# Supplementary material for: Integrative Omics Analysis Reveals a Limited Transcriptional Shock After Yeast Interspecies Hybridization
Source: Front Genet. 2020 May 7;11:404. doi: 10.3389/fgene.2020.00404 (PMC7221068; doi:10.3389/fgene.2020.00404)
Supplement: Supplementary file 7 [file Table_7.XLSX]

## Sheet: Table7
Supplementary table 7. Comparison between SU parental vs SU in hybrid background at 12 C. A. DE analysis; B. list of DE genes; C. GO analysis of DE genes.
A.								B.*				C.
gene	baseMean	log2FoldChange	lfcSE	stat	pvalue	padj		Regulation	SU_gene	SC_ortholog		GO_category	Regulation	GOID	TERM	CORRECTED_PVALUE	UNCORRECTED_PVALUE	NUM_LIST_ANNOTATIONS	LIST_SIZE	TOTAL_NUM_ANNOTATIONS	POPULATION_SIZE	FDR_RATE	EXPECTED_FALSE_POSITIVES	ANNOTATED_GENES
Sbay_1.1	26.602	-0.740485	0.538666	-1.37467	0.169235	0.293152		Up-regulated	YGR144W	Sbay_7.434		Biological Process	Up-regulated	GO:0055114	oxidation-reduction process	0.00684495	1.38843e-05	17	82	462	7166	0	0	YER065C, YGL157W, YMR118C, YGL205W, YLR205C, YIL057C, YIL070C, YHR179W, YMR058W, YDR518W, YIL160C, YFR017C, YDR036C, YGL185C, YLL051C, YPL156C, YBR085W
Sbay_1.2	0	NA	NA	NA	NA	NA		Up-regulated	YGL157W	Sbay_7.108		Biological Process	Up-regulated	GO:0006879	cellular iron ion homeostasis	0.00769376	1.5606e-05	6	82	48	7166	0	0	YLR205C, YMR058W, YLL051C, YLR136C, YEL065W, YHL040C
Sbay_1.3	12.2968	-1.11445	0.591073	-1.88547	0.0593668	0.129831		Up-regulated	YPL156C	Sbay_16.154		Biological Process	Up-regulated	GO:0006875	cellular metal ion homeostasis	0.00941695	1.91013e-05	8	82	102	7166	0	0	YHL040C, YLL051C, YNL027W, YLR205C, YEL065W, YLR136C, YOR316C, YMR058W
Sbay_1.5	54.6004	0.273757	0.290916	0.941018	0.346695	0.49695		Up-regulated	YNL093W	Sbay_14.247		Biological Process	Down-regulated	GO:0046034	ATP metabolic process	5.48778e-13	1.21143e-15	16	71	101	7166	0	0	YOL077W-A, YEL024W, YDR529C, YFR033C, YDL067C, YNL052W, YMR256C, YPR020W, YJL103C, YDR322C-A, YLR295C, YGR183C, YDR298C, YLR395C, YJL166W, YML120C
Sbay_1.6	4831.43	0.0632079	0.614926	0.102789	0.91813	0.953137		Up-regulated	YMR118C	Sbay_13.297		Biological Process	Down-regulated	GO:0009205	purine ribonucleoside triphosphate metabolic process	1.21984e-12	2.69281e-15	16	71	106	7166	0	0	YPR020W, YJL103C, YDR322C-A, YOL077W-A, YDR529C, YFR033C, YEL024W, YDL067C, YNL052W, YMR256C, YLR395C, YJL166W, YML120C, YLR295C, YGR183C, YDR298C
Sbay_1.7	4979	-0.287342	0.178586	-1.60898	0.107621	0.207683		Up-regulated	YLR205C	Sbay_10.299		Biological Process	Down-regulated	GO:0009144	purine nucleoside triphosphate metabolic process	1.65924e-12	3.66279e-15	16	71	108	7166	0	0	YGR183C, YDR298C, YLR295C, YML120C, YLR395C, YJL166W, YFR033C, YDR529C, YEL024W, YDL067C, YNL052W, YOL077W-A, YMR256C, YJL103C, YPR020W, YDR322C-A
Sbay_1.8	300.314	-0.148943	0.291638	-0.510711	0.609554	0.738666		Up-regulated	YGL236C	Sbay_7.24		Biological Process	Down-regulated	GO:0017144	drug metabolic process	2.53929e-12	5.60549e-15	22	71	272	7166	0	0	YLR395C, YJL166W, YML120C, YJR137C, YLR295C, YGR183C, YGR234W, YDR298C, YDR380W, YJR010W, YDR322C-A, YKL001C, YPR020W, YJL103C, YMR256C, YOL077W-A, YLR213C, YEL024W, YDR529C, YFR033C, YDL067C, YNL052W
Sbay_1.9	537.198	0.877449	0.129804	6.75983	1.38157e-11	3.23265e-10		Up-regulated	YJR073C	Sbay_12.163		Biological Process	Down-regulated	GO:0009199	ribonucleoside triphosphate metabolic process	2.6011e-12	5.74194e-15	16	71	111	7166	0	0	YLR295C, YGR183C, YDR298C, YLR395C, YJL166W, YML120C, YMR256C, YOL077W-A, YDR529C, YEL024W, YFR033C, YNL052W, YDL067C, YDR322C-A, YPR020W, YJL103C
Sbay_1.10	608.652	-0.206546	0.182421	-1.13225	0.257529	0.402317		Up-regulated	YLR178C	Sbay_10.275		Biological Process	Down-regulated	GO:0009141	nucleoside triphosphate metabolic process	9.26643e-12	2.04557e-14	16	71	120	7166	0	0	YDR298C, YGR183C, YLR295C, YML120C, YJL166W, YLR395C, YMR256C, YDL067C, YNL052W, YDR529C, YEL024W, YFR033C, YOL077W-A, YDR322C-A, YJL103C, YPR020W
Sbay_1.11	262.997	0.336464	0.223566	1.50499	0.132327	0.242917		Up-regulated	YMR251W	Sbay_13.435		Biological Process	Down-regulated	GO:0009126	purine nucleoside monophosphate metabolic process	1.79311e-11	3.95831e-14	16	71	125	7166	0	0	YDR322C-A, YPR020W, YJL103C, YMR256C, YOL077W-A, YEL024W, YFR033C, YDR529C, YNL052W, YDL067C, YLR395C, YJL166W, YML120C, YLR295C, YGR183C, YDR298C
Sbay_1.12	426.616	1.20402	0.205276	5.86537	4.48119e-09	6.83011e-08		Up-regulated	YER065C	Sbay_5.175		Biological Process	Down-regulated	GO:0009167	purine ribonucleoside monophosphate metabolic process	1.79311e-11	3.95831e-14	16	71	125	7166	0	0	YML120C, YJL166W, YLR395C, YDR298C, YGR183C, YLR295C, YDR322C-A, YJL103C, YPR020W, YMR256C, YNL052W, YDL067C, YFR033C, YDR529C, YEL024W, YOL077W-A
Sbay_1.13	3316.16	-0.163538	0.180704	-0.905005	0.365463	0.516583		Up-regulated	YNL082W	Sbay_14.257		Biological Process	Down-regulated	GO:0006119	oxidative phosphorylation	2.4617e-11	5.43421e-14	11	71	39	7166	0	0	YML120C, YJL166W, YLR395C, YJL103C, YMR256C, YGR183C, YDL067C, YNL052W, YFR033C, YEL024W, YDR529C
Sbay_1.14	912.554	-0.601731	0.142679	-4.21737	2.47172e-05	0.00017563		Up-regulated	YLL051C	Sbay_10.20		Biological Process	Down-regulated	GO:0009161	ribonucleoside monophosphate metabolic process	1.37883e-10	3.04378e-13	16	71	142	7166	0	0	YPR020W, YJL103C, YDR322C-A, YOL077W-A, YNL052W, YDL067C, YEL024W, YDR529C, YFR033C, YMR256C, YJL166W, YLR395C, YML120C, YLR295C, YDR298C, YGR183C
Sbay_1.15	1278.35	0.015911	0.205203	0.077538	0.938196	0.963864		Up-regulated	YDL157C	Sbay_4.88		Biological Process	Down-regulated	GO:0009150	purine ribonucleotide metabolic process	1.54115e-10	3.4021e-13	16	71	143	7166	0	0	YMR256C, YFR033C, YDR529C, YEL024W, YNL052W, YDL067C, YOL077W-A, YDR322C-A, YJL103C, YPR020W, YGR183C, YDR298C, YLR295C, YML120C, YLR395C, YJL166W
Sbay_1.16	515.82	-0.124844	0.137956	-0.904955	0.365489	0.516583		Up-regulated	YGL183C	Sbay_7.80		Biological Process	Down-regulated	GO:0006163	purine nucleotide metabolic process	4.04008e-10	8.9185e-13	16	71	152	7166	0	0	YMR256C, YDR529C, YEL024W, YFR033C, YNL052W, YDL067C, YOL077W-A, YDR322C-A, YJL103C, YPR020W, YGR183C, YDR298C, YLR295C, YML120C, YLR395C, YJL166W
Sbay_1.17	397.645	0.231443	0.146264	1.58236	0.113568	0.216716		Up-regulated	YKL159C	Sbay_11.67		Biological Process	Down-regulated	GO:0009123	nucleoside monophosphate metabolic process	4.47878e-10	9.88693e-13	16	71	153	7166	0	0	YLR395C, YJL166W, YML120C, YLR295C, YGR183C, YDR298C, YPR020W, YJL103C, YDR322C-A, YOL077W-A, YFR033C, YEL024W, YDR529C, YNL052W, YDL067C, YMR256C
Sbay_1.18	421.061	0.547811	0.180886	3.02849	0.00245783	0.00937137		Up-regulated	YHL040C	Sbay_8.12		Biological Process	Down-regulated	GO:0042773	ATP synthesis coupled electron transport	6.03826e-10	1.33295e-12	10	71	37	7166	0	0	YML120C, YLR395C, YJL166W, YFR033C, YEL024W, YDR529C, YDL067C, YNL052W, YGR183C, YMR256C
Sbay_1.19	377.302	0.567591	0.155904	3.64066	0.000271944	0.00143646		Up-regulated	YFR022W	Sbay_6.94		Biological Process	Down-regulated	GO:0042775	mitochondrial ATP synthesis coupled electron transport	6.03826e-10	1.33295e-12	10	71	37	7166	0	0	YLR395C, YJL166W, YML120C, YGR183C, YMR256C, YEL024W, YDR529C, YFR033C, YDL067C, YNL052W
Sbay_1.20	2128.21	-0.141797	0.414081	-0.342437	0.732022	0.829357		Up-regulated	YJR015W	Sbay_12.100		Biological Process	Down-regulated	GO:0009259	ribonucleotide metabolic process	6.71407e-10	1.48213e-12	16	71	157	7166	0	0	YDR298C, YGR183C, YLR295C, YML120C, YJL166W, YLR395C, YMR256C, YDL067C, YNL052W, YFR033C, YDR529C, YEL024W, YOL077W-A, YDR322C-A, YJL103C, YPR020W
Sbay_1.21	1435.36	0.338711	0.195465	1.73285	0.0831221	0.169758		Up-regulated	YIL120W	Sbay_9.70		Biological Process	Down-regulated	GO:0072521	purine-containing compound metabolic process	2.53909e-09	5.60506e-12	16	71	171	7166	0	0	YOL077W-A, YFR033C, YDR529C, YEL024W, YDL067C, YNL052W, YMR256C, YPR020W, YJL103C, YDR322C-A, YLR295C, YGR183C, YDR298C, YLR395C, YJL166W, YML120C
Sbay_1.22	1072.12	0.291671	0.141481	2.06155	0.0392509	0.0930325		Up-regulated	YKR013W	Sbay_11.245		Biological Process	Down-regulated	GO:0019693	ribose phosphate metabolic process	4.32563e-09	9.54886e-12	16	71	177	7166	0	0	YMR256C, YEL024W, YFR033C, YDR529C, YNL052W, YDL067C, YOL077W-A, YDR322C-A, YJL103C, YPR020W, YGR183C, YDR298C, YLR295C, YML120C, YLR395C, YJL166W
Sbay_1.24	883.092	-0.255156	0.159928	-1.59544	0.110613	0.212033		Up-regulated	YBR268W	Sbay_4.529		Biological Process	Down-regulated	GO:0022904	respiratory electron transport chain	8.30302e-09	1.8329e-11	10	71	47	7166	0	0	YMR256C, YGR183C, YDL067C, YNL052W, YFR033C, YEL024W, YDR529C, YML120C, YJL166W, YLR395C
Sbay_1.25	1729.4	0.19586	0.130498	1.50086	0.133391	0.244271		Up-regulated	YNL141W	Sbay_14.197		Biological Process	Down-regulated	GO:0045333	cellular respiration	2.82111e-07	6.22762e-10	12	71	111	7166	0	0	YMR256C, YGR183C, YNL052W, YDL067C, YFR033C, YEL024W, YDR529C, YJR120W, YML120C, YJL166W, YLR395C, YBL030C
Sbay_1.26	1389.39	0.613168	0.294069	2.08512	0.0370587	0.0889705		Up-regulated	YLR179C	Sbay_10.276		Biological Process	Down-regulated	GO:0009117	nucleotide metabolic process	5.44607e-07	1.20222e-09	16	71	244	7166	0	0	YDR298C, YGR183C, YLR295C, YML120C, YJL166W, YLR395C, YNL052W, YDL067C, YFR033C, YEL024W, YDR529C, YOL077W-A, YMR256C, YJL103C, YPR020W, YDR322C-A
Sbay_1.27	96149.8	0.578983	0.159358	3.63323	0.000279892	0.00147454		Up-regulated	YIL152W	Sbay_9.36		Biological Process	Down-regulated	GO:0055086	nucleobase-containing small molecule metabolic process	5.86402e-07	1.29449e-09	17	71	283	7166	0	0	YLR295C, YDR298C, YGR183C, YJL166W, YLR395C, YML120C, YOL077W-A, YNL052W, YDL067C, YEL024W, YFR033C, YDR529C, YMR256C, YPR020W, YJL103C, YDR322C-A, YJR109C
Sbay_1.28	52.3	0.148733	0.439801	0.338184	0.735225	0.831413		Up-regulated	YBR050C	Sbay_4.283		Biological Process	Down-regulated	GO:0006753	nucleoside phosphate metabolic process	7.33413e-07	1.61901e-09	16	71	249	7166	0	0	YMR256C, YDL067C, YNL052W, YFR033C, YEL024W, YDR529C, YOL077W-A, YDR322C-A, YJL103C, YPR020W, YDR298C, YGR183C, YLR295C, YML120C, YJL166W, YLR395C
Sbay_1.29	849.96	0.116388	0.214128	0.543547	0.586753	0.720807		Up-regulated	YBR069C	Sbay_4.308		Biological Process	Down-regulated	GO:0022900	electron transport chain	8.13351e-07	1.79548e-09	10	71	73	7166	0	0	YMR256C, YGR183C, YDL067C, YNL052W, YEL024W, YFR033C, YDR529C, YML120C, YJL166W, YLR395C
Sbay_1.30	7981.17	-0.0613346	0.131029	-0.468099	0.639714	0.761806		Up-regulated	YFL040W	Sbay_6.17		Biological Process	Down-regulated	GO:0009060	aerobic respiration	5.25528e-06	1.16011e-08	10	71	88	7166	0	0	YEL024W, YDR529C, YFR033C, YNL052W, YDL067C, YGR183C, YMR256C, YBL030C, YLR395C, YJL166W
Sbay_1.31	341.334	-0.49462	0.435648	-1.13537	0.256222	0.401083		Up-regulated	YGL185C	Sbay_7.78		Biological Process	Down-regulated	GO:0044281	small molecule metabolic process	1.40317e-05	3.0975e-08	26	71	828	7166	0	0	YKL001C, YER055C, YPR020W, YJL103C, YJR109C, YDR322C-A, YJR010W, YDR035W, YOL077W-A, YEL024W, YDR529C, YFR033C, YDL067C, YNL052W, YOR100C, YMR256C, YJR137C, YER052C, YLR395C, YJL166W, YML120C, YDR380W, YLR295C, YGR183C, YOL032W, YDR298C
Sbay_1.32	656.463	-0.0485301	0.191089	-0.253966	0.799522	0.87589		Up-regulated	YIL101C	Sbay_9.95		Biological Process	Down-regulated	GO:0015980	energy derivation by oxidation of organic compounds	2.48663e-05	5.48925e-08	12	71	164	7166	0	0	YJL166W, YBL030C, YLR395C, YML120C, YJR120W, YNL052W, YDL067C, YDR529C, YEL024W, YFR033C, YMR256C, YGR183C
Sbay_1.33	168.233	-0.682118	0.213495	-3.19501	0.00139827	0.00583667		Up-regulated	YDR281C	Sbay_2.447		Biological Process	Down-regulated	GO:0006122	mitochondrial electron transport, ubiquinol to cytochrome c	2.81451e-05	6.21304e-08	5	71	12	7166	0	0	YGR183C, YJL166W, YEL024W, YFR033C, YDR529C
Sbay_1.34	218.825	0.267243	0.195029	1.37027	0.170602	0.295093		Up-regulated	YFR017C	Sbay_6.87		Biological Process	Down-regulated	GO:0055114	oxidation-reduction process	2.82034e-05	6.22591e-08	19	71	462	7166	0	0	YJR137C, YJL166W, YLR395C, YML120C, YGR234W, YGR183C, YML130C, YKL001C, YML087C, YBL030C, YJR010W, YJR120W, YDL067C, YNL052W, YFR033C, YEL024W, YDR529C, YLR214W, YMR256C
Sbay_1.35	699.092	-0.434774	0.153817	-2.82656	0.00470502	0.0164717		Up-regulated	YBR020W	Sbay_2.149		Biological Process	Down-regulated	GO:1901135	carbohydrate derivative metabolic process	3.56911e-05	7.87883e-08	17	71	372	7166	0	0	YLR395C, YJL166W, YML120C, YLR295C, YGR183C, YDR298C, YDR322C-A, YPR020W, YJL103C, YMR256C, YLR213C, YOL077W-A, YFR033C, YEL024W, YDR529C, YDL067C, YNL052W
Sbay_1.36	573.715	0.382429	0.153146	2.49715	0.0125197	0.036493		Up-regulated	YMR058W	Sbay_13.231		Biological Process	Down-regulated	GO:0006458	'de novo' protein folding	5.27793e-05	1.16511e-07	6	71	25	7166	0	0	YAL005C, YNL007C, YMR186W, YPL240C, YLL024C, YNL064C
Sbay_1.37	997.965	-0.455985	0.160711	-2.8373	0.00454974	0.0160784		Up-regulated	YIR038C	Sbay_9.254		Biological Process	Down-regulated	GO:0019637	organophosphate metabolic process	8.76816e-05	1.93558e-07	18	71	445	7166	0	0	YLR295C, YOL032W, YDR298C, YGR183C, YJL166W, YLR395C, YML120C, YOL077W-A, YDL067C, YNL052W, YFR033C, YEL024W, YDR529C, YMR256C, YPR020W, YJL103C, YDR322C-A, YJR109C
Sbay_1.38	517.319	0.488772	0.20515	2.3825	0.0171953	0.0473605		Up-regulated	YDR321W	Sbay_2.491		Biological Process	Down-regulated	GO:0006091	generation of precursor metabolites and energy	0.000106898	2.35979e-07	13	71	225	7166	0	0	YJL103C, YML120C, YLR395C, YBL030C, YJL166W, YFR033C, YEL024W, YDR529C, YNL052W, YDL067C, YJR120W, YGR183C, YMR256C
Sbay_1.39	169.834	-0.209402	0.234179	-0.894196	0.371217	0.522706		Up-regulated	YNL027W	Sbay_14.318		Biological Process	Down-regulated	GO:0098662	inorganic cation transmembrane transport	0.000113035	2.49524e-07	11	71	153	7166	0	0	YDL067C, YNL052W, YOL077W-A, YGL255W, YDR298C, YMR256C, YLR295C, YLR411W, YPR020W, YDR322C-A, YLR395C
Sbay_1.40	799.647	-0.116952	0.12296	-0.951138	0.341534	0.493675		Up-regulated	YBR231C	Sbay_4.487		Biological Process	Down-regulated	GO:0006812	cation transport	0.000160263	3.53782e-07	13	71	233	7166	0	0	YDR322C-A, YLR395C, YLR411W, YPR020W, YDR298C, YLR214W, YMR256C, YLR295C, YNL052W, YDL067C, YGR096W, YOL077W-A, YGL255W
Sbay_1.41	1051.68	-0.358395	0.298863	-1.19919	0.230453	0.369589		Up-regulated	YER150W	Sbay_5.278		Biological Process	Down-regulated	GO:0098655	cation transmembrane transport	0.000166986	3.68622e-07	12	71	195	7166	0	0	YNL052W, YDL067C, YGR096W, YOL077W-A, YGL255W, YMR256C, YDR298C, YLR295C, YLR411W, YPR020W, YDR322C-A, YLR395C
Sbay_1.42	235.174	-0.691645	0.217254	-3.18358	0.00145464	0.0060467		Up-regulated	YLR121C	Sbay_10.212		Biological Process	Down-regulated	GO:0098660	inorganic ion transmembrane transport	0.000347366	7.66812e-07	11	71	171	7166	0	0	YMR256C, YDR298C, YLR295C, YDL067C, YNL052W, YOL077W-A, YGL255W, YDR322C-A, YLR395C, YLR411W, YPR020W
Sbay_1.43	3013.18	-0.0466431	0.119358	-0.390784	0.695957	0.804008		Up-regulated	YBR241C	Sbay_4.501		Biological Process	Down-regulated	GO:0015992	proton transport	0.000410453	9.06077e-07	9	71	107	7166	0	0	YPR020W, YLR395C, YDR322C-A, YOL077W-A, YNL052W, YDL067C, YLR295C, YDR298C, YMR256C
Sbay_1.44	452.231	0.214802	0.158946	1.35141	0.176563	0.302607		Up-regulated	YBR147W	Sbay_4.396		Biological Process	Down-regulated	GO:1902600	hydrogen ion transmembrane transport	0.000410453	9.06077e-07	9	71	107	7166	0	0	YPR020W, YLR395C, YDR322C-A, YOL077W-A, YDL067C, YNL052W, YLR295C, YMR256C, YDR298C
Sbay_1.45	1762.33	0.151709	0.140567	1.07927	0.280469	0.429561		Up-regulated	YDR476C	Sbay_2.650		Biological Process	Down-regulated	GO:0035719	tRNA import into nucleus	0.000422333	9.32303e-07	3	71	3	7166	0	0	YNL007C, YNL064C, YLL024C
Sbay_1.46	189.985	0.219119	0.251796	0.870224	0.384178	0.535841		Up-regulated	YHR160C	Sbay_15.359		Biological Process	Down-regulated	GO:0034220	ion transmembrane transport	0.000470795	1.03928e-06	13	71	256	7166	0	0	YLR411W, YPR020W, YDR033W, YDR322C-A, YLR395C, YGR096W, YDL067C, YNL052W, YGL255W, YOL077W-A, YDR298C, YMR256C, YLR295C
Sbay_1.47	2.21723	1.32397	1.37932	0.959871	0.33712	0.489777		Up-regulated	YEL065W	Sbay_5.2		Biological Process	Down-regulated	GO:0006754	ATP biosynthetic process	0.000518039	1.14357e-06	5	71	20	7166	0	0	YLR295C, YDR322C-A, YDR298C, YOL077W-A, YPR020W
Sbay_1.48	1086.13	-0.26176	0.124864	-2.09636	0.0360505	0.0872143		Up-regulated	YDR234W	Sbay_2.400		Biological Process	Down-regulated	GO:0015985	energy coupled proton transport, down electrochemical gradient	0.000518039	1.14357e-06	5	71	20	7166	0	0	YLR295C, YDR298C, YDR322C-A, YOL077W-A, YPR020W
Sbay_1.49	6.25808	-2.30149	0.982398	-2.34273	0.0191431	0.0519327		Up-regulated	YMR084W	Sbay_13.262		Biological Process	Down-regulated	GO:0015986	ATP synthesis coupled proton transport	0.000518039	1.14357e-06	5	71	20	7166	0	0	YOL077W-A, YPR020W, YDR298C, YDR322C-A, YLR295C
Sbay_1.50	1732.26	-0.577846	0.178762	-3.23248	0.00122719	0.00523071		Up-regulated	YJR148W	Sbay_12.242		Biological Process	Down-regulated	GO:0006457	protein folding	0.000604764	1.33502e-06	9	71	112	7166	0	0	YML130C, YNL007C, YDR214W, YAL005C, YNL064C, YLL024C, YPL240C, YPR158W, YMR186W
Sbay_1.51	2930.91	0.0396512	0.103971	0.381367	0.702931	0.809265		Up-regulated	YGL251C	Sbay_7.10		Biological Process	Down-regulated	GO:0055085	transmembrane transport	0.000756574	1.67014e-06	17	71	461	7166	0	0	YDR033W, YDR322C-A, YBL030C, YAL005C, YPR020W, YOR100C, YMR256C, YDL067C, YNL052W, YOL077W-A, YLR395C, YLR411W, YDR298C, YLR295C, YGR096W, YGL255W, YLL024C
Sbay_1.52	141.379	0.831299	0.237402	3.50165	0.000462393	0.00228715		Up-regulated	YIL160C	Sbay_9.25		Biological Process	Down-regulated	GO:0015672	monovalent inorganic cation transport	0.0010076	2.22427e-06	9	71	119	7166	0	0	YDR298C, YMR256C, YLR295C, YDL067C, YNL052W, YOL077W-A, YDR322C-A, YLR395C, YPR020W
Sbay_1.53	727.265	0.403989	0.135334	2.98512	0.0028347	0.0106124		Up-regulated	YGR131W	Sbay_7.419		Biological Process	Down-regulated	GO:0009408	response to heat	0.00114139	2.51963e-06	8	71	90	7166	0	0	YAL005C, YDR214W, YKL062W, YNL064C, YLL024C, YPL240C, YPR158W, YMR186W
Sbay_1.54	571.121	0.105417	0.171231	0.615639	0.538133	0.680103		Up-regulated	YLR267W	Sbay_10.365		Biological Process	Down-regulated	GO:0009145	purine nucleoside triphosphate biosynthetic process	0.00170823	3.77093e-06	5	71	25	7166	0	0	YOL077W-A, YPR020W, YLR295C, YDR322C-A, YDR298C
Sbay_1.55	12.3458	-0.221747	0.559318	-0.396459	0.691766	0.801273		Up-regulated	YML058W-A	Sbay_13.99		Biological Process	Down-regulated	GO:0009206	purine ribonucleoside triphosphate biosynthetic process	0.00170823	3.77093e-06	5	71	25	7166	0	0	YOL077W-A, YPR020W, YLR295C, YDR322C-A, YDR298C
Sbay_1.56	2932.72	0.0627423	0.182878	0.343083	0.731536	0.828964		Up-regulated	YIR018W	Sbay_9.231		Biological Process	Down-regulated	GO:0009266	response to temperature stimulus	0.00172076	3.79859e-06	8	71	95	7166	0	0	YNL064C, YLL024C, YPL240C, YMR186W, YPR158W, YKL062W, YAL005C, YDR214W
Sbay_1.57	648.968	0.0291065	0.169443	0.171778	0.863612	0.917074		Up-regulated	YOR316C	Sbay_8.368		Biological Process	Down-regulated	GO:0042026	protein refolding	0.00209874	4.63299e-06	5	71	26	7166	0	0	YPL240C, YLL024C, YNL064C, YAL005C, YMR186W
Sbay_1.58	416.235	0.115147	0.157196	0.732503	0.463862	0.611877		Up-regulated	YKR097W	Sbay_11.334		Biological Process	Down-regulated	GO:0006811	ion transport	0.00243969	5.38563e-06	15	71	395	7166	0	0	YBL030C, YLR395C, YDR322C-A, YDR033W, YPR020W, YLR411W, YLR295C, YLR214W, YDR298C, YMR256C, YOL077W-A, YGL255W, YDL067C, YNL052W, YGR096W
Sbay_1.59	407.185	0.0251591	0.155749	0.161535	0.871672	0.922168		Up-regulated	YIL057C	Sbay_9.141		Biological Process	Down-regulated	GO:0034605	cellular response to heat	0.00304538	6.7227e-06	7	71	73	7166	0	0	YPL240C, YLL024C, YPR158W, YAL005C, YDR214W, YMR186W, YKL062W
Sbay_1.60	770.637	0.0980009	0.17129	0.572135	0.567231	0.704481		Up-regulated	YDR309C	Sbay_2.476		Biological Process	Down-regulated	GO:0016310	phosphorylation	0.00321242	7.09144e-06	15	71	404	7166	0	0	YLR395C, YER052C, YDL214C, YJL166W, YML120C, YKL001C, YJL103C, YGR052W, YGR183C, YMR256C, YEL024W, YDR529C, YFR033C, YNL052W, YDL067C
Sbay_1.61	686.08	0.00773633	0.250957	0.0308273	0.975407	0.986991		Up-regulated	YDL169C	Sbay_4.77		Biological Process	Down-regulated	GO:0006796	phosphate-containing compound metabolic process	0.00384155	8.48025e-06	22	71	826	7166	0	0	YNL052W, YDL067C, YFR033C, YEL024W, YDR529C, YOL077W-A, YMR256C, YGR052W, YJL103C, YPR020W, YKL001C, YDR322C-A, YJR109C, YDL214C, YDR298C, YOL032W, YGR183C, YLR295C, YML120C, YJL166W, YER052C, YLR395C
Sbay_1.62	0	NA	NA	NA	NA	NA		Up-regulated	YDR036C	Sbay_2.194		Biological Process	Down-regulated	GO:0009201	ribonucleoside triphosphate biosynthetic process	0.00440897	9.73282e-06	5	71	30	7166	0	0	YPR020W, YOL077W-A, YDR322C-A, YDR298C, YLR295C
Sbay_1.63	64947.8	-1.69228	0.336233	-5.03306	4.82703e-07	4.9257e-06		Up-regulated	YGL162W	Sbay_7.100		Biological Process	Down-regulated	GO:0006793	phosphorus metabolic process	0.00709819	1.56693e-05	22	71	858	7166	0	0	YGR052W, YMR256C, YOL077W-A, YEL024W, YDR529C, YFR033C, YDL067C, YNL052W, YDL214C, YJR109C, YDR322C-A, YKL001C, YPR020W, YJL103C, YLR295C, YGR183C, YDR298C, YOL032W, YER052C, YLR395C, YJL166W, YML120C
Sbay_1.64	2.72176	-3.42958	1.50406	-2.28022	0.0225946	0.0595171		Up-regulated	YOL141W	Sbay_15.19		Biological Process	Down-regulated	GO:0006404	RNA import into nucleus	0.00826759	1.82508e-05	3	71	6	7166	0	0	YLL024C, YNL064C, YNL007C
Sbay_1.65	2927.91	-1.36729	0.302182	-4.52472	6.0476e-06	4.92189e-05		Up-regulated	YER149C	Sbay_5.277		Biological Process	Down-regulated	GO:0009403	toxin biosynthetic process	0.00826759	1.82508e-05	3	71	6	7166	0	0	YJR010W, YKL001C, YJR137C
Sbay_1.66	16806.1	-1.53351	0.339004	-4.52357	6.0804e-06	4.94187e-05		Up-regulated	YMR199W	Sbay_13.381		Biological Process	Down-regulated	GO:0070813	hydrogen sulfide metabolic process	0.00826759	1.82508e-05	3	71	6	7166	0	0	YJR010W, YJR137C, YKL001C
Sbay_1.68	19711	-0.705442	0.151937	-4.64297	3.43432e-06	2.96848e-05		Up-regulated	YDR242W	Sbay_2.408		Biological Process	Down-regulated	GO:0070814	hydrogen sulfide biosynthetic process	0.00826759	1.82508e-05	3	71	6	7166	0	0	YKL001C, YJR137C, YJR010W
Sbay_1.69	1020.93	-0.323996	0.154309	-2.09965	0.0357593	0.086755		Up-regulated	YGL205W	Sbay_7.56		Biological Process	Down-regulated	GO:0009142	nucleoside triphosphate biosynthetic process	0.0083482	1.84287e-05	5	71	34	7166	0	0	YPR020W, YOL077W-A, YLR295C, YDR298C, YDR322C-A
Sbay_1.70	821.918	-0.0510301	0.135923	-0.375434	0.707338	0.812767		Up-regulated	YIL070C	Sbay_9.131		Biological Process	Down-regulated	GO:0006123	mitochondrial electron transport, cytochrome c to oxygen	0.00865536	1.91068e-05	4	71	17	7166	0	0	YDL067C, YNL052W, YLR395C, YMR256C
Sbay_1.71	0	NA	NA	NA	NA	NA		Up-regulated	YMR316W	Sbay_13.509		Molecular Function	Down-regulated	GO:0009055	electron transfer activity	5.83563e-07	5.40336e-09	9	71	60	7166	0	0	YDR529C, YLR395C, YDL067C, YJL166W, YMR256C, YGR183C, YEL024W, YFR033C, YNL052W
Sbay_1.72	1140.87	-0.145548	0.116401	-1.2504	0.211152	0.34657		Up-regulated	YGL143C	Sbay_7.121		Molecular Function	Down-regulated	GO:0008121	ubiquinol-cytochrome-c reductase activity	1.09248e-06	1.01156e-08	5	71	9	7166	0	0	YDR529C, YEL024W, YFR033C, YGR183C, YJL166W
Sbay_1.73	1598.04	0.0556889	0.178889	0.311305	0.755569	0.846704		Up-regulated	YLR136C	Sbay_10.229		Molecular Function	Down-regulated	GO:0016679	oxidoreductase activity, acting on diphenols and related substances as donors	1.09248e-06	1.01156e-08	5	71	9	7166	0	0	YDR529C, YGR183C, YEL024W, YFR033C, YJL166W
Sbay_1.74	276.591	-0.362712	0.172216	-2.10615	0.0351917	0.0857252		Up-regulated	YHR096C	Sbay_15.287		Molecular Function	Down-regulated	GO:0016681	oxidoreductase activity, acting on diphenols and related substances as donors, cytochrome as acceptor	1.09248e-06	1.01156e-08	5	71	9	7166	0	0	YEL024W, YFR033C, YGR183C, YDR529C, YJL166W
Sbay_1.75	1065.19	0.324286	0.214785	1.50981	0.131091	0.241418		Up-regulated	YPL198W	Sbay_16.109		Molecular Function	Down-regulated	GO:0022890	inorganic cation transmembrane transporter activity	1.66972e-05	1.54604e-07	11	71	146	7166	0	0	YLR295C, YOL077W-A, YLR411W, YNL052W, YGL255W, YDR322C-A, YPR020W, YLR395C, YDL067C, YMR256C, YDR298C
Sbay_1.76	161.918	-0.232818	0.247659	-0.940074	0.34718	0.497392		Up-regulated	YMR317W	Sbay_13.510		Molecular Function	Down-regulated	GO:0015075	ion transmembrane transporter activity	3.28287e-05	3.03969e-07	14	71	271	7166	0	0	YGR096W, YGL255W, YPR020W, YDR322C-A, YMR256C, YBL030C, YDR033W, YDR298C, YLR395C, YDL067C, YOL077W-A, YLR295C, YLR411W, YNL052W
Sbay_1.77	26.2184	-0.652402	0.386536	-1.68782	0.0914459	0.182892		Up-regulated	YBR085W	Sbay_4.330		Molecular Function	Down-regulated	GO:0008324	cation transmembrane transporter activity	4.20801e-05	3.8963e-07	12	71	196	7166	0	0	YGL255W, YDR322C-A, YPR020W, YGR096W, YLR395C, YDL067C, YMR256C, YDR298C, YLR295C, YOL077W-A, YLR411W, YNL052W
Sbay_1.78	24.2767	-0.0289259	0.410033	-0.0705452	0.94376	0.967413		Up-regulated	YDR518W	Sbay_2.699		Molecular Function	Down-regulated	GO:0046933	proton-transporting ATP synthase activity, rotational mechanism	5.0446e-05	4.67092e-07	5	71	17	7166	0	0	YDR298C, YLR295C, YPR020W, YDR322C-A, YOL077W-A
Sbay_1.79	150.562	-0.190331	0.188642	-1.00895	0.312997	0.463843		Up-regulated	YBR141C	Sbay_4.390		Molecular Function	Down-regulated	GO:0015078	hydrogen ion transmembrane transporter activity	7.06839e-05	6.54481e-07	9	71	103	7166	0	0	YDR322C-A, YPR020W, YDR298C, YMR256C, YDL067C, YLR395C, YOL077W-A, YLR295C, YNL052W
Sbay_1.80	88.5472	0.662838	0.271625	2.44027	0.0146763	0.0415459		Up-regulated	YGL156W	Sbay_7.109		Molecular Function	Down-regulated	GO:0016491	oxidoreductase activity	0.000115694	1.07124e-06	15	71	347	7166	0	0	YMR256C, YJL166W, YDL067C, YJR137C, YLR395C, YLR214W, YDR529C, YGR234W, YNL052W, YML087C, YFR033C, YEL024W, YGR183C, YML120C, YML130C
Sbay_1.81	0	NA	NA	NA	NA	NA		Up-regulated	YGR055W	Sbay_7.337		Molecular Function	Down-regulated	GO:0015077	monovalent inorganic cation transmembrane transporter activity	0.000123776	1.14607e-06	9	71	110	7166	0	0	YLR395C, YDL067C, YMR256C, YDR298C, YPR020W, YDR322C-A, YNL052W, YLR295C, YOL077W-A
Sbay_1.82	653.415	-0.322809	0.16029	-2.01391	0.0440187	0.102001		Up-regulated	YER096W	Sbay_5.215		Molecular Function	Down-regulated	GO:0022857	transmembrane transporter activity	0.000268083	2.48225e-06	15	71	371	7166	0	0	YNL052W, YLR411W, YLR295C, YOL077W-A, YDL067C, YLR395C, YDR298C, YDR033W, YMR256C, YBL030C, YDR322C-A, YGL255W, YPR020W, YOR100C, YGR096W
Sbay_1.83	4402.82	1.43104	0.342801	4.17454	2.98585e-05	0.000209184		Up-regulated	YOR229W	Sbay_8.280		Molecular Function	Down-regulated	GO:0044769	ATPase activity, coupled to transmembrane movement of ions, rotational mechanism	0.00124369	1.15156e-05	5	71	31	7166	0	0	YDR298C, YLR295C, YPR020W, YDR322C-A, YOL077W-A
Sbay_1.84	315.545	-0.0990192	0.214649	-0.461306	0.644579	0.765469		Up-regulated	YDL109C	Sbay_4.137		Molecular Function	Down-regulated	GO:0015318	inorganic molecular entity transmembrane transporter activity	0.00174439	1.61518e-05	11	71	234	7166	0	0	YLR295C, YOL077W-A, YLR411W, YNL052W, YGL255W, YDR322C-A, YPR020W, YLR395C, YDL067C, YMR256C, YDR298C
Sbay_1.85	0	NA	NA	NA	NA	NA		Up-regulated	YHR179W	Sbay_15.379		Molecular Function	Down-regulated	GO:0005215	transporter activity	0.00213713	1.97882e-05	15	71	440	7166	0	0	YNL052W, YLR411W, YLR295C, YOL077W-A, YDL067C, YLR395C, YDR298C, YDR033W, YBL030C, YMR256C, YGL255W, YPR020W, YDR322C-A, YOR100C, YGR096W
Sbay_1.86	424.358	0.229851	0.142837	1.60918	0.107576	0.207664		Down-regulated	YDL214C	Sbay_4.33		Molecular Function	Down-regulated	GO:0004129	cytochrome-c oxidase activity	0.00263331	2.43825e-05	4	71	18	7166	0	0	YLR395C, YDL067C, YNL052W, YMR256C
Sbay_1.87	12.2612	2.66209	0.691745	3.84837	0.000118908	0.000709422		Down-regulated	YPL165C	Sbay_16.145		Molecular Function	Down-regulated	GO:0015002	heme-copper terminal oxidase activity	0.00263331	2.43825e-05	4	71	18	7166	0	0	YLR395C, YNL052W, YDL067C, YMR256C
Sbay_1.88	4.77962	1.75225	0.975779	1.79574	0.0725356	0.152881		Down-regulated	YDR380W	Sbay_2.554		Molecular Function	Down-regulated	GO:0016675	oxidoreductase activity, acting on a heme group of donors	0.00263331	2.43825e-05	4	71	18	7166	0	0	YLR395C, YNL052W, YDL067C, YMR256C
Sbay_1.89	5.48169	0.776629	0.77731	0.999124	0.317735	0.468829		Down-regulated	YDR035W	Sbay_2.193		Molecular Function	Down-regulated	GO:0016676	oxidoreductase activity, acting on a heme group of donors, oxygen as acceptor	0.00263331	2.43825e-05	4	71	18	7166	0	0	YMR256C, YNL052W, YDL067C, YLR395C
Sbay_1.90	0	NA	NA	NA	NA	NA		Down-regulated	YEL017C-A	Sbay_5.65		Molecular Function	Down-regulated	GO:0019829	cation-transporting ATPase activity	0.00449452	4.16159e-05	5	71	40	7166	0	0	YPR020W, YDR322C-A, YLR295C, YOL077W-A, YDR298C
Sbay_1.91	2.40624	1.52747	1.22432	1.24761	0.212176	0.347534		Down-regulated	YLR023C	Sbay_10.104		Molecular Function	Down-regulated	GO:0042625	ATPase coupled ion transmembrane transporter activity	0.00803089	7.43601e-05	5	71	45	7166	0	0	YOL077W-A, YLR295C, YPR020W, YDR322C-A, YDR298C
Sbay_1.92	5.52249	1.47717	0.830147	1.77941	0.0751732	0.157553		Down-regulated	YLR108C	Sbay_10.198		Cellular Component	Up-regulated	GO:0031226	intrinsic component of plasma membrane	0.00288197	2.36227e-05	8	82	105	7166	0	0	YLR121C, YIL120W, YGR055W, YMR058W, YHL040C, YFL040W, YEL065W, YHR096C
Sbay_1.93	0	NA	NA	NA	NA	NA		Down-regulated	YNL064C	Sbay_14.277		Cellular Component	Down-regulated	GO:0098800	inner mitochondrial membrane protein complex	1.16587e-11	1.15433e-13	14	71	90	7166	0	0	YPR020W, YNL052W, YDR298C, YOL077W-A, YFR033C, YDR322C-A, YJL166W, YLR295C, YLR395C, YGR183C, YMR256C, YDL067C, YEL024W, YDR529C
Sbay_1.94	0	NA	NA	NA	NA	NA		Down-regulated	YJR109C	Sbay_12.200		Cellular Component	Down-regulated	GO:0070069	cytochrome complex	2.24103e-10	2.21884e-12	9	71	27	7166	0	0	YNL052W, YJL166W, YFR033C, YGR183C, YLR395C, YMR256C, YDL067C, YDR529C, YEL024W
Sbay_1.95	0	NA	NA	NA	NA	NA		Down-regulated	YMR186W	Sbay_13.367		Cellular Component	Down-regulated	GO:0005743	mitochondrial inner membrane	3.61443e-10	3.57865e-12	19	71	260	7166	0	0	YOL077W-A, YML120C, YPR020W, YLR295C, YFR033C, YOR100C, YMR256C, YOR147W, YGR183C, YLR395C, YDR529C, YDL067C, YBL030C, YDR298C, YGR096W, YNL052W, YJL166W, YDR322C-A, YEL024W
Sbay_1.96	8.96411	0.893699	0.64775	1.3797	0.16768	0.291047		Down-regulated	YOL048C	Sbay_15.122		Cellular Component	Down-regulated	GO:0098798	mitochondrial protein complex	4.84012e-10	4.7922e-12	14	71	117	7166	0	0	YMR256C, YLR395C, YGR183C, YDR529C, YEL024W, YDL067C, YOL077W-A, YNL052W, YPR020W, YDR298C, YLR295C, YDR322C-A, YJL166W, YFR033C
Sbay_1.97	5.25426	1.09837	0.840056	1.3075	0.191043	0.320995		Down-regulated	YPR071W	Sbay_16.399		Cellular Component	Down-regulated	GO:0019866	organelle inner membrane	8.06085e-10	7.98104e-12	19	71	272	7166	0	0	YFR033C, YLR295C, YML120C, YPR020W, YOL077W-A, YDL067C, YDR529C, YLR395C, YOR147W, YGR183C, YMR256C, YOR100C, YJL166W, YDR322C-A, YGR096W, YNL052W, YDR298C, YBL030C, YEL024W
Sbay_1.98	12.6862	1.32011	0.62724	2.10463	0.0353238	0.0860119		Down-regulated	YGR234W	Sbay_7.526		Cellular Component	Down-regulated	GO:0005746	mitochondrial respiratory chain	3.17101e-09	3.13961e-11	9	71	35	7166	0	0	YNL052W, YJL166W, YFR033C, YMR256C, YLR395C, YGR183C, YEL024W, YDR529C, YDL067C
Sbay_1.99	0	NA	NA	NA	NA	NA		Down-regulated	YGR096W	Sbay_7.379		Cellular Component	Down-regulated	GO:0098803	respiratory chain complex	3.17101e-09	3.13961e-11	9	71	35	7166	0	0	YFR033C, YJL166W, YNL052W, YDL067C, YDR529C, YEL024W, YGR183C, YLR395C, YMR256C
Sbay_1.100	220.13	0.513723	0.183221	2.80385	0.00504967	0.0173637		Down-regulated	YDR214W	Sbay_2.382		Cellular Component	Down-regulated	GO:0070469	respiratory chain	9.22348e-09	9.13215e-11	9	71	39	7166	0	0	YNL052W, YFR033C, YJL166W, YMR256C, YGR183C, YLR395C, YEL024W, YDR529C, YDL067C
Sbay_1.101	0.608818	3.13768	2.91275	1.07722	0.281382	0.429937		Down-regulated	YLR295C	Sbay_10.390		Cellular Component	Down-regulated	GO:0044455	mitochondrial membrane part	2.23089e-08	2.2088e-10	15	71	185	7166	0	0	YMR256C, YGR183C, YLR395C, YDR529C, YEL024W, YDL067C, YOL077W-A, YDR298C, YPR020W, YGR096W, YNL052W, YLR295C, YJL166W, YDR322C-A, YFR033C
Sbay_1.102	2.26252	1.74649	1.36622	1.27834	0.201131	0.333455		Down-regulated	YJR120W	Sbay_12.211		Cellular Component	Down-regulated	GO:0031966	mitochondrial membrane	8.34835e-07	8.26569e-09	19	71	408	7166	0	0	YDR529C, YDL067C, YMR256C, YOR100C, YLR395C, YOR147W, YGR183C, YLR295C, YFR033C, YOL077W-A, YML120C, YPR020W, YEL024W, YJL166W, YDR322C-A, YBL030C, YNL052W, YGR096W, YDR298C
Sbay_1.104	0.608818	3.13768	2.91275	1.07722	0.281382	0.429937		Down-regulated	YLR297W	Sbay_10.391		Cellular Component	Down-regulated	GO:0005750	mitochondrial respiratory chain complex III	2.02766e-06	2.00758e-08	5	71	10	7166	0	0	YEL024W, YDR529C, YJL166W, YFR033C, YGR183C
Sbay_1.105	0	NA	NA	NA	NA	NA		Down-regulated	YLR214W	Sbay_10.308		Cellular Component	Down-regulated	GO:0045275	respiratory chain complex III	2.02766e-06	2.00758e-08	5	71	10	7166	0	0	YGR183C, YFR033C, YJL166W, YEL024W, YDR529C
Sbay_1.106	1.18367	0.433565	1.68893	0.256709	0.797403	0.875057		Down-regulated	YFR033C	Sbay_6.109		Cellular Component	Down-regulated	GO:0005740	mitochondrial envelope	4.12066e-06	4.07986e-08	19	71	450	7166	0	0	YJL166W, YDR322C-A, YGR096W, YNL052W, YDR298C, YBL030C, YEL024W, YFR033C, YLR295C, YPR020W, YML120C, YOL077W-A, YDL067C, YDR529C, YLR395C, YGR183C, YOR147W, YMR256C, YOR100C
Sbay_1.108	5.14281	0.684828	0.882206	0.776268	0.437591	0.586785		Down-regulated	YAL005C	Sbay_1.63		Cellular Component	Down-regulated	GO:0000276	mitochondrial proton-transporting ATP synthase complex, coupling factor F(o)	1.01189e-05	1.00187e-07	5	71	13	7166	0	0	YLR295C, YDR322C-A, YOL077W-A, YDR298C, YPR020W
Sbay_1.109	2.86082	-0.689182	1.12502	-0.612595	0.540144	0.681437		Down-regulated	YGR052W	Sbay_7.334		Cellular Component	Down-regulated	GO:0045263	proton-transporting ATP synthase complex, coupling factor F(o)	1.01189e-05	1.00187e-07	5	71	13	7166	0	0	YOL077W-A, YPR020W, YDR298C, YLR295C, YDR322C-A
Sbay_1.110	1199.95	0.202369	0.204465	0.989748	0.322297	0.473061		Down-regulated	YER035W	Sbay_5.133		Cellular Component	Down-regulated	GO:0098796	membrane protein complex	1.67418e-05	1.6576e-07	14	71	258	7166	0	0	YJL166W, YDR322C-A, YFR033C, YLR295C, YDR298C, YNL052W, YPR020W, YOL077W-A, YDL067C, YDR529C, YEL024W, YGR183C, YLR395C, YMR256C
Sbay_1.111	77.62	-0.627004	0.294022	-2.13251	0.0329649	0.0810922		Down-regulated	YKL096W	Sbay_11.129		Cellular Component	Down-regulated	GO:0044429	mitochondrial part	5.9888e-05	5.9295e-07	21	71	646	7166	0	0	YLR295C, YFR033C, YOL077W-A, YML120C, YPR020W, YDR529C, YDL067C, YMR256C, YOR100C, YLR395C, YGR234W, YGR183C, YOR147W, YJL166W, YDR322C-A, YBL030C, YGR096W, YNL052W, YDR298C, YEL024W, YML091C
Sbay_1.113	1.69651	4.60408	1.88	2.44898	0.0143261	0.0406505		Down-regulated	YPR010C-A	Sbay_16.333		Cellular Component	Down-regulated	GO:0005753	mitochondrial proton-transporting ATP synthase complex	6.482e-05	6.41782e-07	5	71	18	7166	0	0	YDR322C-A, YLR295C, YDR298C, YPR020W, YOL077W-A
Sbay_1.114	28.0579	-0.526402	0.396928	-1.32619	0.184777	0.312924		Down-regulated	YIL130W	Sbay_9.59		Cellular Component	Down-regulated	GO:0045259	proton-transporting ATP synthase complex	6.482e-05	6.41782e-07	5	71	18	7166	0	0	YPR020W, YDR298C, YOL077W-A, YDR322C-A, YLR295C
Sbay_1.115	14.8494	-0.763616	0.57922	-1.31835	0.187385	0.316358		Down-regulated	YKL001C	Sbay_11.228		Cellular Component	Down-regulated	GO:0033177	proton-transporting two-sector ATPase complex, proton-transporting domain	0.000115501	1.14357e-06	5	71	20	7166	0	0	YLR295C, YDR322C-A, YOL077W-A, YDR298C, YPR020W
Sbay_1.116	2667.24	0.366024	0.614576	0.595571	0.551462	0.691694		Down-regulated	YMR136W	Sbay_13.316		Cellular Component	Down-regulated	GO:0031967	organelle envelope	0.000374735	3.71025e-06	19	71	602	7166	0	0	YDR322C-A, YJL166W, YBL030C, YDR298C, YGR096W, YNL052W, YEL024W, YLR295C, YFR033C, YOL077W-A, YML120C, YPR020W, YDR529C, YDL067C, YOR100C, YMR256C, YOR147W, YGR183C, YLR395C
Sbay_1.117	200.159	0.287962	0.20521	1.40326	0.16054	0.281562		Down-regulated	YPL240C	Sbay_16.67		Cellular Component	Down-regulated	GO:0031975	envelope	0.000374735	3.71025e-06	19	71	602	7166	0	0	YML120C, YPR020W, YOL077W-A, YFR033C, YLR295C, YOR147W, YGR183C, YLR395C, YOR100C, YMR256C, YDL067C, YDR529C, YDR298C, YGR096W, YNL052W, YBL030C, YJL166W, YDR322C-A, YEL024W
Sbay_10.1	112.262	0.12675	0.252299	0.502378	0.615402	0.742598		Down-regulated	YNL052W	Sbay_14.288		Cellular Component	Down-regulated	GO:0031224	intrinsic component of membrane	0.00049355	4.88663e-06	31	71	1437	7166	0	0	YOR147W, YLR411W, YGR183C, YLR395C, YKL096W, YOR100C, YMR256C, YDL067C, YPR010C-A, YDR529C, YML087C, YLR297W, YOL077W-A, YGL255W, YFR033C, YPR157W, YPR071W, YLR295C, YLR023C, YDR033W, YEL024W, YOL048C, YDR298C, YGR096W, YNL052W, YLR214W, YBL030C, YGR041W, YDR322C-A, YJL166W, YEL017C-A
Sbay_10.2	4.95906	-0.440048	0.893322	-0.492598	0.622297	0.748205		Down-regulated	YLL024C	Sbay_10.49		Cellular Component	Down-regulated	GO:0005739	mitochondrion	0.000505416	5.00412e-06	28	71	1213	7166	0	0	YFR033C, YLR295C, YLL024C, YPR020W, YML120C, YGR052W, YOL077W-A, YDL067C, YJR010W, YDR529C, YMR186W, YOR147W, YGR183C, YLR395C, YGR234W, YOR100C, YMR256C, YDL181W, YJL166W, YDR322C-A, YDR298C, YGR096W, YNL052W, YDR035W, YBL030C, YEL024W, YML091C, YDR033W
Sbay_10.3	9.6854	1.72328	0.708591	2.43198	0.0150167	0.0423295		Down-regulated	YDR033W	Sbay_2.186		Cellular Component	Down-regulated	GO:0016021	integral component of membrane	0.000617425	6.11312e-06	30	71	1375	7166	0	0	YEL024W, YOL048C, YDR033W, YGR041W, YDR322C-A, YJL166W, YEL017C-A, YBL030C, YLR214W, YDR298C, YNL052W, YGR096W, YDR529C, YML087C, YDL067C, YPR010C-A, YOR100C, YMR256C, YLR411W, YGR183C, YOR147W, YLR395C, YPR157W, YLR295C, YPR071W, YLR023C, YGL255W, YFR033C, YOL077W-A, YLR297W
Sbay_10.4	22.831	1.12127	0.5254	2.13413	0.0328324	0.0809246		Down-regulated	YML130C	Sbay_13.11		Cellular Component	Down-regulated	GO:0031090	organelle membrane	0.00161704	1.60103e-05	24	71	996	7166	0	0	YDR322C-A, YEL017C-A, YJL166W, YGR096W, YNL052W, YDR298C, YBL030C, YEL024W, YAL005C, YFR033C, YLL024C, YLR295C, YPR020W, YML120C, YLR297W, YOL077W-A, YDL067C, YDR529C, YLR395C, YLR411W, YGR183C, YOR147W, YMR256C, YOR100C
Sbay_10.5	17.4777	0.876808	0.527306	1.66281	0.0963511	0.190476		Down-regulated	YJR094C	Sbay_12.181		Cellular Component	Down-regulated	GO:0016020	membrane	0.0019152	1.89623e-05	38	71	2118	7166	0	0	YGL255W, YFR033C, YPR157W, YLR023C, YLR297W, YML120C, YPR020W, YDL067C, YML130C, YMR186W, YGR183C, YKL096W, YLR395C, YMR256C, YJL166W, YDR322C-A, YDR298C, YNL052W, YBL030C, YEL024W, YOL048C, YDR033W, YPR071W, YLR295C, YLL024C, YOL077W-A, YPR010C-A, YDR529C, YML087C, YLR411W, YOR147W, YOR100C, YGR041W, YEL017C-A, YPL240C, YGR096W, YLR214W, YAL005C
Sbay_10.7	139.943	0.466598	0.218357	2.13686	0.0326094	0.0804821		Down-regulated	YOR147W	Sbay_8.198		Cellular Component	Down-regulated	GO:0005751	mitochondrial respiratory chain complex IV	0.00192978	1.91068e-05	4	71	17	7166	0	0	YLR395C, YNL052W, YMR256C, YDL067C
Sbay_10.8	278.213	0.595926	0.177391	3.35938	0.000781168	0.00356374		Down-regulated	YLR395C	Sbay_10.512		Cellular Component	Down-regulated	GO:0045277	respiratory chain complex IV	0.00192978	1.91068e-05	4	71	17	7166	0	0	YLR395C, YNL052W, YMR256C, YDL067C
Sbay_10.9	116.318	0.254685	0.364217	0.699266	0.484386	0.631166		Down-regulated	YER055C	Sbay_5.161		Cellular Component	Down-regulated	GO:0016469	proton-transporting two-sector ATPase complex	0.00215489	2.13355e-05	5	71	35	7166	0	0	YDR322C-A, YLR295C, YPR020W, YDR298C, YOL077W-A
Sbay_10.10	540.742	0.215476	0.145963	1.47623	0.139882	0.253471		Down-regulated	YDL181W	Sbay_4.66		Cellular Component	Down-regulated	GO:0044425	membrane part	0.00231123	2.28834e-05	33	71	1707	7166	0	0	YPR010C-A, YML087C, YDR529C, YLR411W, YOR147W, YOR100C, YLR295C, YPR071W, YOL077W-A, YEL017C-A, YGR041W, YGR096W, YLR214W, YML130C, YDL067C, YLR395C, YKL096W, YGR183C, YMR256C, YFR033C, YGL255W, YLR023C, YPR157W, YPR020W, YLR297W, YOL048C, YEL024W, YDR033W, YJL166W, YDR322C-A, YNL052W, YDR298C, YBL030C
Sbay_10.11	19.1843	-0.049387	0.464204	-0.106391	0.915272	0.951489		Down-regulated	YDR322C-A	Sbay_2.493		Cellular Component	Down-regulated	GO:1990204	oxidoreductase complex	0.00600882	5.94932e-05	5	71	43	7166	0	0	YDR529C, YEL024W, YJL166W, YFR033C, YGR183C
Sbay_10.12	77.0799	2.1479	0.300097	7.15734	8.22604e-13	2.30252e-11		Down-regulated	YGR041W	Sbay_7.326
Sbay_10.13	250.809	0.892965	0.246151	3.62771	0.000285948	0.00150117		Down-regulated	YOR100C	Sbay_8.154
Sbay_10.14	246.79	-0.709967	0.223309	-3.17931	0.00147628	0.00612817		Down-regulated	YJL103C	Sbay_6.178
Sbay_10.15	3.11308	-0.918802	1.04842	-0.876368	0.38083	0.53261		Down-regulated	YML091C	Sbay_13.58
Sbay_10.16	0.245865	1.73959	4.08047	0.426321	0.669874	NA		Down-regulated	YML087C	Sbay_13.64
Sbay_10.17	852.706	1.2999	1.22582	1.06043	0.288948	0.437623		Down-regulated	YPR020W	Sbay_16.344
Sbay_10.18	286.859	0.560431	0.200752	2.79166	0.00524382	0.0178875		Down-regulated	YBR250W	Sbay_4.511
Sbay_10.19	1773.39	0.633183	0.235166	2.6925	0.00709191	0.0228267		Down-regulated	YML120C	Sbay_13.23
Sbay_10.20	507.68	1.81483	0.19677	9.2231	2.88645e-20	3.03331e-18		Down-regulated	YGR183C	Sbay_7.476
Sbay_10.21	6431.26	0.22135	0.108944	2.03179	0.0421749	0.0986057		Down-regulated	YJL166W	Sbay_6.247
Sbay_10.22	93.3598	0.647644	0.286268	2.26237	0.0236746	0.061899		Down-regulated	YLR213C	Sbay_10.307
Sbay_10.23	2140.7	-0.733021	0.144534	-5.0716	3.94487e-07	4.11668e-06		Down-regulated	YJR137C	Sbay_12.229
Sbay_10.24	2.11479	-1.95182	1.52656	-1.27858	0.201046	0.333406		Down-regulated	YCL058W-A	Sbay_3.154
Sbay_10.25	14162.2	0.306828	0.160306	1.91402	0.055618	0.122786		Down-regulated	YER052C	Sbay_5.157
Sbay_10.26	1850.48	-0.164825	0.178457	-0.923612	0.355688	0.506352		Down-regulated	YOL077W-A	Sbay_15.88
Sbay_10.27	61.9698	0.00648579	0.267149	0.0242778	0.980631	0.989739		Down-regulated	YDL067C	Sbay_4.182
Sbay_10.28	5307.44	-1.41312	0.176131	-8.02311	1.03102e-15	4.71435e-14		Down-regulated	YPR158W	Sbay_16.486
Sbay_10.29	3038.29	-0.205057	0.183073	-1.12009	0.262677	0.408791		Down-regulated	YBL030C	Sbay_2.89
Sbay_10.30	324.735	-1.35444	0.193675	-6.99337	2.6836e-12	6.98902e-11		Down-regulated	YMR256C	Sbay_13.440
Sbay_10.31	0	NA	NA	NA	NA	NA		Down-regulated	YNL007C	Sbay_14.341
Sbay_10.32	0	NA	NA	NA	NA	NA		Down-regulated	YPR157W	Sbay_16.485
Sbay_10.33	0	NA	NA	NA	NA	NA		Down-regulated	YOL032W	Sbay_15.135
Sbay_10.34	0	NA	NA	NA	NA	NA		Down-regulated	YGL255W	Sbay_7.6
Sbay_10.35	182.018	-0.132786	0.255967	-0.518765	0.603925	0.734818		Down-regulated	YOR107W	Sbay_8.159
Sbay_10.36	627.359	-0.178103	0.126953	-1.40291	0.160644	0.281562		Down-regulated	YDR529C	Sbay_2.711
Sbay_10.37	104.784	-0.140919	0.258934	-0.544227	0.586285	0.720527		Down-regulated	YOR204W	Sbay_8.257
Sbay_10.38	468.021	-0.0556282	0.270506	-0.205645	0.837068	0.899218		Down-regulated	YLR411W	Sbay_10.527
Sbay_10.39	85.1848	-0.827719	0.291642	-2.83814	0.00453775	0.016055		Down-regulated	YKL062W	Sbay_11.164
Sbay_10.40	181.339	-0.274632	0.255965	-1.07292	0.283305	0.431824		Down-regulated	YJR010W	Sbay_12.94
Sbay_10.41	635.102	0.181665	0.129735	1.40027	0.161432	0.282494		Down-regulated	YEL024W	Sbay_5.45
Sbay_10.42	2942.8	-0.0987046	0.145494	-0.678411	0.497511	0.642257		Down-regulated	YDR298C	Sbay_2.464
Sbay_10.43	1666.1	-0.696517	0.723686	-0.962456	0.33582	0.4886		Down-regulated	YGL117W	Sbay_7.151
Sbay_10.44	658.991	-0.980928	0.214967	-4.56315	5.03919e-06	4.16917e-05
Sbay_10.45	54792.5	-0.962698	0.363947	-2.64516	0.00816516	0.0257012
Sbay_10.47	0	NA	NA	NA	NA	NA		*Only SC orthologs are shown
Sbay_10.48	131.064	-1.17101	0.204075	-5.73815	9.57156e-09	1.38153e-07
Sbay_10.49	55632.9	-1.51724	0.328912	-4.6129	3.97093e-06	3.36434e-05
Sbay_10.51	2252.47	0.0702932	0.203037	0.346209	0.729185	0.827552
Sbay_10.52	398.788	-0.152685	0.204818	-0.745467	0.455989	0.603886
Sbay_10.54	946.621	0.379146	0.13792	2.74902	0.00597733	0.0199466
Sbay_10.55	2240.63	-1.29329	0.172478	-7.49829	6.4655e-14	2.22577e-12
Sbay_10.56	315.437	-0.352634	0.301144	-1.17098	0.241607	0.384491
Sbay_10.57	8460.14	0.290166	0.170568	1.70117	0.0889115	0.178838
Sbay_10.58	160.548	-0.0175095	0.213731	-0.081923	0.934708	0.962603
Sbay_10.59	235.249	-0.104815	0.18282	-0.573322	0.566427	0.703774
Sbay_10.60	0	NA	NA	NA	NA	NA
Sbay_10.61	590.457	0.217873	0.156977	1.38792	0.16516	0.28759
Sbay_10.62	2481.79	0.0735633	0.181161	0.406066	0.684694	0.796246
Sbay_10.63	159.313	-0.80837	0.246179	-3.28367	0.00102463	0.00448652
Sbay_10.64	664.971	-0.58793	0.232385	-2.52999	0.0114066	0.0339084
Sbay_10.65	700.237	-1.17494	0.130681	-8.99092	2.45172e-19	2.22513e-17
Sbay_10.66	2507.94	1.27905	0.125466	10.1944	2.09961e-24	4.19223e-22
Sbay_10.67	738.992	-0.0714055	0.32485	-0.219811	0.826019	0.892518
Sbay_10.68	643.861	-0.309196	0.147183	-2.10076	0.035662	0.0865892
Sbay_10.69	324.139	-0.0807482	0.150965	-0.534881	0.592732	0.726453
Sbay_10.70	27.2346	-0.33895	0.376278	-0.900797	0.367696	0.518878
Sbay_10.71	0	NA	NA	NA	NA	NA
Sbay_10.72	304.902	0.0589587	0.181296	0.325207	0.745024	0.839168
Sbay_10.73	463.775	0.0451849	0.153722	0.293939	0.768804	0.854544
Sbay_10.74	258.791	0.147865	0.167815	0.88112	0.378253	0.53012
Sbay_10.75	2515.65	-0.264826	0.129718	-2.04155	0.0411958	0.0967318
Sbay_10.76	0	NA	NA	NA	NA	NA
Sbay_10.78	611.178	0.338605	0.155588	2.17629	0.0295338	0.0741129
Sbay_10.79	673.448	-0.181352	0.270754	-0.669805	0.502982	0.647962
Sbay_10.81	659.57	-0.421275	0.201187	-2.09395	0.0362645	0.0874847
Sbay_10.82	150.463	0.179899	0.207592	0.866598	0.386162	0.537506
Sbay_10.83	858.382	0.487724	0.142298	3.42749	0.000609192	0.00288008
Sbay_10.84	1362.44	-1.00509	0.142348	-7.06081	1.65533e-12	4.46641e-11
Sbay_10.85	258.666	0.206053	0.194624	1.05872	0.289725	0.438527
Sbay_10.86	1168.69	0.61874	0.156484	3.95401	7.68515e-05	0.000485502
Sbay_10.87	973.337	-0.111404	0.339039	-0.328587	0.742468	0.836761
Sbay_10.88	143.011	0.147832	0.187749	0.787393	0.431052	0.581009
Sbay_10.89	0	NA	NA	NA	NA	NA
Sbay_10.90	0.523543	1.57135	3.15459	0.498116	0.618402	0.745318
Sbay_10.91	53.8052	0.46202	0.301785	1.53096	0.12578	0.234629
Sbay_10.92	0.669446	-1.03142	2.435	-0.423584	0.671869	0.786342
Sbay_10.93	0.932385	-0.168184	2.04213	-0.0823571	0.934363	0.962603
Sbay_10.94	65.2531	1.19552	0.353811	3.37899	0.000727536	0.00336521
Sbay_10.95	184.614	0.856485	0.193638	4.42312	9.72843e-06	7.56025e-05
Sbay_10.96	264.598	-0.348041	0.174383	-1.99584	0.0459513	0.105419
Sbay_10.97	474.477	1.01184	0.212092	4.77075	1.83544e-06	1.68624e-05
Sbay_10.98	517.077	0.0796839	0.149243	0.533921	0.593396	0.727029
Sbay_10.99	609.163	-0.57162	0.140917	-4.05644	4.98267e-05	0.000331625
Sbay_10.100	313.474	-0.854146	0.171942	-4.96765	6.77694e-07	6.65473e-06
Sbay_10.101	272.611	-0.305492	0.2379	-1.28412	0.1991	0.331191
Sbay_10.102	507.357	-0.787381	0.242118	-3.25206	0.00114571	0.00493017
Sbay_10.104	3373.37	-1.70351	0.220861	-7.71301	1.22882e-14	4.7488e-13
Sbay_10.105	648.977	-0.454607	0.164954	-2.75596	0.00585195	0.0196107
Sbay_10.106	1108.96	0.0652496	0.129443	0.50408	0.614205	0.741661
Sbay_10.107	638.128	0.521807	0.139395	3.74338	0.000181558	0.00101639
Sbay_10.108	1745.93	-0.543344	0.223262	-2.43366	0.0149471	0.042173
Sbay_10.109	6375.06	-0.404418	0.116767	-3.46347	0.000533263	0.00258756
Sbay_10.110	44965.3	-0.251582	0.143285	-1.75581	0.0791212	0.163708
Sbay_10.111	9.99542	0.0437987	0.752747	0.0581851	0.953601	0.974288
Sbay_10.112	333.168	0.135617	0.23537	0.576187	0.564489	0.702094
Sbay_10.113	890.659	-0.453874	0.159398	-2.84742	0.0044075	0.0156311
Sbay_10.114	740.58	0.268201	0.155892	1.72043	0.0853546	0.173196
Sbay_10.115	0.126235	-0.183963	4.08047	-0.0450838	0.964041	NA
Sbay_10.116	53.0395	-0.195118	0.284249	-0.686433	0.49244	0.638191
Sbay_10.117	0.923123	-1.62457	2.0272	-0.801385	0.422909	0.572609
Sbay_10.118	877.089	-1.13798	0.151979	-7.48776	7.00585e-14	2.398e-12
Sbay_10.119	2.09436	0.0919497	1.37026	0.0671038	0.946499	0.96915
Sbay_10.120	2.55017	-1.46776	1.30715	-1.12287	0.261493	0.407265
Sbay_10.121	0	NA	NA	NA	NA	NA
Sbay_10.122	0.6591	-2.44412	2.35694	-1.03699	0.29974	0.449986
Sbay_10.123	3994.89	-1.32752	0.175646	-7.55793	4.09527e-14	1.4689e-12
Sbay_10.124	644.469	-0.295997	0.138391	-2.13884	0.0324487	0.0802196
Sbay_10.125	3.07365	0.352471	1.23586	0.285204	0.775488	0.859262
Sbay_10.126	20.102	-0.710839	0.527691	-1.34707	0.177957	0.304299
Sbay_10.127	1889.3	0.654891	0.133698	4.8983	9.66705e-07	9.32458e-06
Sbay_10.128	114204	0.0236975	0.148003	0.160116	0.87279	0.922703
Sbay_10.129	494.438	-0.271712	0.167227	-1.62481	0.104204	0.202328
Sbay_10.130	92.5271	0.333417	0.28943	1.15198	0.24933	0.392919
Sbay_10.131	285.548	-0.0120716	0.15884	-0.0759988	0.93942	0.964871
Sbay_10.132	23919.9	0.0941651	0.127481	0.738661	0.460113	0.608271
Sbay_10.133	486.086	0.278389	0.205407	1.35531	0.17532	0.301253
Sbay_10.134	327.715	0.081365	0.264442	0.307686	0.758321	0.848639
Sbay_10.135	216.586	0.0985455	0.273346	0.360515	0.718462	0.820355
Sbay_10.136	496.436	0.294618	0.138191	2.13196	0.0330102	0.0811703
Sbay_10.137	146.897	-0.436592	0.28565	-1.52842	0.126409	0.235299
Sbay_10.138	19.7371	0.908718	0.454285	2.00033	0.045465	0.104704
Sbay_10.139	398.044	0.255051	0.135764	1.87863	0.0602947	0.131572
Sbay_10.140	1541.33	0.322407	0.33966	0.949206	0.342516	0.49426
Sbay_10.141	532.899	0.143574	0.204926	0.700613	0.483545	0.630482
Sbay_10.142	12382.9	0.11387	0.684589	0.166333	0.867895	0.91917
Sbay_10.143	305.032	0.0667441	0.147925	0.451203	0.651843	0.771704
Sbay_10.144	7340.74	0.00708769	0.146087	0.048517	0.961304	0.979121
Sbay_10.145	6423.9	-0.541614	0.155752	-3.47741	0.000506274	0.00248166
Sbay_10.146	1058.26	-0.867544	0.177727	-4.88133	1.05372e-06	1.00988e-05
Sbay_10.147	196.089	0.0733484	0.297281	0.246731	0.805117	0.880527
Sbay_10.148	734.483	-0.592308	0.127883	-4.63163	3.62803e-06	3.109e-05
Sbay_10.149	772.565	-0.580585	0.235595	-2.46434	0.0137266	0.0393949
Sbay_10.150	1226.03	-0.164938	0.190393	-0.866306	0.386323	0.537506
Sbay_10.151	475.308	-0.274612	0.143721	-1.91073	0.0560391	0.1235
Sbay_10.152	333.741	0.142582	0.235053	0.606598	0.544118	0.685584
Sbay_10.153	8146.87	1.3013	0.158088	8.23147	1.84929e-16	9.54933e-15
Sbay_10.154	248.272	0.282802	0.335192	0.8437	0.398837	0.548848
Sbay_10.155	1187.12	-0.457801	0.128172	-3.57176	0.000354594	0.00180154
Sbay_10.156	945.697	0.255742	0.167169	1.52984	0.126056	0.234933
Sbay_10.157	96.8218	1.19555	0.43326	2.75942	0.00579044	0.0194749
Sbay_10.158	430.904	-0.195904	0.320222	-0.611774	0.540687	0.681979
Sbay_10.159	60072.5	-0.389454	0.137938	-2.82341	0.00475163	0.0165864
Sbay_10.160	599.861	1.28989	0.151699	8.50295	1.84825e-17	1.11828e-15
Sbay_10.161	568.781	0.0312004	0.129062	0.241748	0.808976	0.882974
Sbay_10.162	1564.43	-0.250763	0.179057	-1.40047	0.161373	0.282494
Sbay_10.163	545.131	1.4733	0.172212	8.55513	1.17736e-17	7.34621e-16
Sbay_10.164	1461.22	-0.372474	0.276023	-1.34943	0.177198	0.303477
Sbay_10.165	513.745	0.131596	0.314886	0.417917	0.676008	0.789643
Sbay_10.166	374.292	-0.0575877	0.204128	-0.282116	0.777855	0.860855
Sbay_10.167	2437.61	-0.290313	0.105262	-2.75799	0.00581579	0.0195233
Sbay_10.168	412.262	-0.740565	0.202103	-3.66429	0.000248027	0.00131826
Sbay_10.169	171.821	0.514205	0.189958	2.70694	0.00679066	0.0220466
Sbay_10.170	414.833	0.669675	0.14401	4.65019	3.31625e-06	2.88306e-05
Sbay_10.171	453.482	-0.160147	0.163346	-0.980412	0.326883	0.477684
Sbay_10.172	699.288	0.270883	0.149234	1.81515	0.0695009	0.14789
Sbay_10.173	2214.59	-0.0775379	0.1506	-0.514861	0.60665	0.736861
Sbay_10.174	1094.66	0.599947	0.153441	3.90996	9.23111e-05	0.000568872
Sbay_10.175	67.4064	1.35094	0.291392	4.63615	3.54951e-06	3.05482e-05
Sbay_10.176	172.727	-0.400391	0.223454	-1.79183	0.0731603	0.153927
Sbay_10.177	1559.95	0.183566	0.116587	1.5745	0.115372	0.219321
Sbay_10.178	543.298	-0.482796	0.147831	-3.26586	0.00109132	0.00473012
Sbay_10.179	910.701	-0.248984	0.152299	-1.63484	0.102083	0.199145
Sbay_10.180	1036.62	-0.416005	0.130058	-3.19862	0.00138089	0.00577757
Sbay_10.181	527.427	-0.0687417	0.155402	-0.442348	0.658238	0.776456
Sbay_10.182	491.848	0.094986	0.152445	0.623084	0.533229	0.675274
Sbay_10.183	556.269	1.4149	0.173464	8.15676	3.4412e-16	1.67584e-14
Sbay_10.185	280.717	0.804027	0.189953	4.23276	2.3084e-05	0.000165398
Sbay_10.186	1733.39	0.829857	0.142941	5.80559	6.4139e-09	9.55704e-08
Sbay_10.187	298.538	0.478528	0.179913	2.65978	0.00781926	0.0248603
Sbay_10.188	181.333	-0.129957	0.259706	-0.500401	0.616793	0.743827
Sbay_10.189	464.423	0.357031	0.178622	1.99881	0.0456294	0.104881
Sbay_10.190	323.282	0.198698	0.172915	1.14911	0.250513	0.394161
Sbay_10.191	2022.19	-0.272179	0.28423	-0.9576	0.338264	0.490487
Sbay_10.192	208.634	-0.467963	0.243598	-1.92105	0.0547257	0.12141
Sbay_10.193	13.3528	0.352213	0.654401	0.538222	0.590424	0.724424
Sbay_10.194	7.61269	-1.09028	0.764643	-1.42587	0.153907	0.27243
Sbay_10.195	12.7488	0.167972	0.595523	0.282058	0.777899	0.860855
Sbay_10.196	10.3063	-0.686688	0.669942	-1.025	0.305364	0.456257
Sbay_10.197	1.31911	-2.21519	1.82858	-1.21142	0.225734	0.36348
Sbay_10.198	757.418	-1.82059	0.304576	-5.97746	2.26644e-09	3.62026e-08
Sbay_10.199	37995.9	-0.414371	0.280705	-1.47618	0.139896	0.253471
Sbay_10.200	51542.7	-0.313166	0.113336	-2.76316	0.00572445	0.0192637
Sbay_10.201	0.307815	0.777822	3.70522	0.209926	0.833725	0.896752
Sbay_10.202	4733.93	0.225727	0.139053	1.62332	0.104521	0.202848
Sbay_10.203	0.767577	0.27242	2.38988	0.113989	0.909247	0.947692
Sbay_10.204	118.082	-0.287628	0.214982	-1.33792	0.180923	0.308229
Sbay_10.205	750.912	-0.236478	0.15468	-1.52882	0.126308	0.235184
Sbay_10.206	1185.25	0.243575	0.123121	1.97835	0.0478895	0.108673
Sbay_10.207	698.379	-0.337556	0.167537	-2.01481	0.0439242	0.101861
Sbay_10.208	531.171	0.200307	0.141005	1.42057	0.155442	0.274337
Sbay_10.209	862.629	0.436439	0.169191	2.57956	0.00989268	0.0300897
Sbay_10.210	377.118	0.0638026	0.198743	0.32103	0.748188	0.842233
Sbay_10.211	5726.69	0.493695	0.159058	3.10386	0.00191011	0.00761754
Sbay_10.212	1017.24	2.36093	0.383543	6.15557	7.4809e-10	1.30263e-08
Sbay_10.213	0	NA	NA	NA	NA	NA
Sbay_10.214	24.8028	-0.287747	0.421555	-0.682586	0.494869	0.640368
Sbay_10.216	20.3888	-0.259994	0.447724	-0.580702	0.561442	0.700376
Sbay_10.217	95.9566	-0.769289	0.281102	-2.73669	0.00620607	0.020571
Sbay_10.218	156.906	0.233125	0.248027	0.939916	0.347261	0.497392
Sbay_10.219	225.237	1.22734	0.232963	5.26841	1.37612e-07	1.5671e-06
Sbay_10.220	309.264	0.226193	0.152274	1.48544	0.137428	0.250286
Sbay_10.221	138.442	0.216028	0.200631	1.07674	0.281596	0.430076
Sbay_10.222	845.702	-0.492621	0.290278	-1.69706	0.0896844	0.18009
Sbay_10.223	868.411	-1.27817	0.217406	-5.87917	4.12328e-09	6.33293e-08
Sbay_10.224	473.846	-0.020579	0.284727	-0.0722761	0.942382	0.966562
Sbay_10.225	148.282	-0.18628	0.225372	-0.826545	0.408495	0.558777
Sbay_10.226	690.58	0.170046	0.184259	0.922864	0.356078	0.506647
Sbay_10.227	2191.95	-2.04609	0.873309	-2.34292	0.0191334	0.0519299
Sbay_10.228	392.644	0.0700043	0.139856	0.500545	0.616692	0.743827
Sbay_10.229	109.157	2.6602	0.271069	9.81373	9.82721e-23	1.59095e-20
Sbay_10.230	177.918	0.561218	0.1781	3.15115	0.00162631	0.00668148
Sbay_10.231	1418.22	0.231992	0.170765	1.35854	0.174291	0.300001
Sbay_10.232	736.547	0.719855	0.177371	4.05848	4.93929e-05	0.000329469
Sbay_10.235	92.982	-0.292261	0.227188	-1.28643	0.198293	0.330593
Sbay_10.237	803.881	0.0349194	0.660154	0.0528958	0.957815	0.97673
Sbay_10.238	0.566536	1.72108	2.6332	0.653609	0.513364	0.657024
Sbay_10.239	678.81	-0.0806583	0.148143	-0.544461	0.586124	0.720527
Sbay_10.240	92.757	1.23557	0.279127	4.42657	9.57437e-06	7.4578e-05
Sbay_10.241	758.147	0.190632	0.151358	1.25948	0.207858	0.342428
Sbay_10.242	416.143	0.844915	0.168013	5.02888	4.9336e-07	5.0259e-06
Sbay_10.243	492.952	-0.373861	0.195082	-1.91644	0.0553096	0.122253
Sbay_10.244	156.07	-0.614518	0.278287	-2.20822	0.027229	0.069464
Sbay_10.245	392.621	-0.228254	0.15037	-1.51795	0.129027	0.238468
Sbay_10.246	685.033	-0.195091	0.151046	-1.2916	0.196495	0.328681
Sbay_10.247	829.551	0.614339	0.22689	2.70765	0.00677605	0.0220174
Sbay_10.248	0.40663	-1.74432	3.35056	-0.520604	0.602642	0.734003
Sbay_10.249	25278.3	0.191809	0.107264	1.78819	0.0737458	0.154996
Sbay_10.250	214.934	0.53289	0.218698	2.43664	0.0148243	0.0419054
Sbay_10.251	376.26	-0.175264	0.23328	-0.751303	0.45247	0.601219
Sbay_10.252	4402.75	0.130181	0.106085	1.22714	0.219771	0.35658
Sbay_10.253	189.741	0.0102385	0.248305	0.0412333	0.96711	0.983506
Sbay_10.254	9.7033	-3.38023	0.91322	-3.70144	0.000214382	0.00117488
Sbay_10.255	80.6316	-1.29652	0.276344	-4.6917	2.70943e-06	2.40081e-05
Sbay_10.256	369.122	-0.779962	0.233959	-3.33375	0.000856841	0.00384222
Sbay_10.260	2516.56	0.750436	0.135537	5.53676	3.0812e-08	4.09232e-07
Sbay_10.261	8.35143	0.274657	0.705528	0.389292	0.69706	0.804817
Sbay_10.262	213.223	0.0322984	0.175302	0.184244	0.853822	0.910845
Sbay_10.263	571.344	-0.56243	0.131253	-4.28509	1.82667e-05	0.000134917
Sbay_10.265	323.339	0.0933039	0.180045	0.518226	0.6043	0.735126
Sbay_10.266	95217.8	0.0826953	0.158173	0.522816	0.601102	0.733769
Sbay_10.267	1424.8	-1.45952	0.222657	-6.555	5.56426e-11	1.16538e-09
Sbay_10.268	928.943	0.496153	0.125477	3.95414	7.68089e-05	0.000485502
Sbay_10.269	1917.62	0.251941	0.141262	1.7835	0.0745044	0.15637
Sbay_10.270	922.458	-0.0535821	0.136783	-0.391729	0.695258	0.803666
Sbay_10.271	137.902	-0.298584	0.277152	-1.07733	0.281333	0.429937
Sbay_10.272	6622.28	-0.185607	0.188563	-0.984322	0.324957	0.475915
Sbay_10.273	480.081	-0.160274	0.178491	-0.897939	0.369218	0.520282
Sbay_10.274	3539.84	-0.605364	0.20409	-2.96616	0.0030154	0.0111979
Sbay_10.275	1588.57	1.55262	0.268248	5.78799	7.12335e-09	1.05096e-07
Sbay_10.276	92.6381	2.19978	0.263222	8.35712	6.42653e-17	3.53164e-15
Sbay_10.277	1307.45	0.357302	0.245244	1.45692	0.145137	0.260369
Sbay_10.278	653.732	0.101096	0.128872	0.784463	0.432769	0.582929
Sbay_10.279	977.163	0.0274489	0.120336	0.228101	0.819568	0.889672
Sbay_10.280	390.104	-0.0228324	0.281165	-0.0812064	0.935278	0.962762
Sbay_10.281	13513.8	-0.317761	0.125272	-2.53656	0.0111946	0.0333943
Sbay_10.282	1112.32	-0.319643	0.127163	-2.51364	0.0119491	0.0351894
Sbay_10.283	1913.67	0.127529	0.145839	0.874452	0.381872	0.53357
Sbay_10.284	641.522	0.459309	0.127644	3.59836	0.000320235	0.00164512
Sbay_10.285	494.362	0.209933	0.167555	1.25292	0.210234	0.345393
Sbay_10.286	742.4	-0.30316	0.169403	-1.78958	0.0735213	0.154632
Sbay_10.287	279.714	0.176966	0.162573	1.08854	0.276358	0.424894
Sbay_10.288	3153.56	0.173247	0.14106	1.22818	0.21938	0.356146
Sbay_10.289	1877.26	0.12481	0.163584	0.762973	0.445479	0.594551
Sbay_10.290	3869.72	1.13133	0.186028	6.08151	1.19055e-09	2.00321e-08
Sbay_10.291	1280.79	0.7476	0.15413	4.85046	1.23178e-06	1.16378e-05
Sbay_10.292	974.701	0.330833	0.275131	1.20246	0.229187	0.367952
Sbay_10.293	11311.6	-0.0726708	0.208397	-0.348713	0.727305	0.826599
Sbay_10.294	524.679	-0.119865	0.157622	-0.76046	0.44698	0.596039
Sbay_10.295	557.034	-0.513234	0.124979	-4.10658	4.01569e-05	0.00027334
Sbay_10.296	1812.04	0.235708	0.171964	1.37068	0.170474	0.294956
Sbay_10.297	3656.31	1.01393	0.163538	6.19993	5.64891e-10	9.97017e-09
Sbay_10.298	1344.59	1.04745	0.151599	6.90936	4.86829e-12	1.22013e-10
Sbay_10.299	3913.32	1.86028	0.281841	6.60047	4.0987e-11	8.96029e-10
Sbay_10.300	2159.03	0.23428	0.16349	1.43299	0.15186	0.269763
Sbay_10.301	1086.69	0.415823	0.137655	3.02075	0.0025215	0.00957756
Sbay_10.302	2837.44	0.331039	0.10811	3.06205	0.00219824	0.00855029
Sbay_10.303	706.023	0.561193	0.151288	3.70943	0.000207728	0.0011447
Sbay_10.304	120.909	-0.3711	0.214265	-1.73197	0.083279	0.169963
Sbay_10.305	260.605	0.228849	0.168852	1.35532	0.175314	0.301253
Sbay_10.306	276.506	-0.745113	0.216236	-3.44583	0.000569304	0.0027281
Sbay_10.307	219.183	-2.0225	0.271081	-7.46087	8.59554e-14	2.87639e-12
Sbay_10.308	1174.71	-2.39175	0.345253	-6.92753	4.28258e-12	1.08239e-10
Sbay_10.310	396.142	-0.322817	0.219684	-1.46946	0.141707	0.255825
Sbay_10.311	12681.6	-1.30902	0.347859	-3.76309	0.000167825	0.000954672
Sbay_10.312	910.241	0.623617	0.202687	3.07676	0.00209266	0.00819818
Sbay_10.313	1395.95	-0.656664	0.17205	-3.81671	0.000135244	0.000792671
Sbay_10.314	1371.2	-0.471449	0.129828	-3.63135	0.000281945	0.00148405
Sbay_10.315	576.178	0.436449	0.22973	1.89984	0.0574544	0.126155
Sbay_10.316	897.348	-0.40289	0.223974	-1.79883	0.0720461	0.152117
Sbay_10.317	510.358	-0.604221	0.219067	-2.75815	0.00581292	0.0195233
Sbay_10.318	748.456	-0.775741	0.139861	-5.5465	2.91441e-08	3.89672e-07
Sbay_10.319	1683.76	-0.940614	0.191563	-4.91021	9.09775e-07	8.8038e-06
Sbay_10.320	295.256	0.0395514	0.158722	0.249186	0.803217	0.878931
Sbay_10.321	3.79559	-0.934325	0.951266	-0.98219	0.326006	0.476869
Sbay_10.322	0.235396	-0.985169	4.00567	-0.245944	0.805726	NA
Sbay_10.323	225.651	0.109215	0.232632	0.469476	0.638729	0.76136
Sbay_10.324	1715.1	0.297482	0.144014	2.06564	0.0388623	0.0923018
Sbay_10.325	0	NA	NA	NA	NA	NA
Sbay_10.326	0.148734	-0.183963	4.08047	-0.0450838	0.964041	NA
Sbay_10.327	666.843	1.23733	0.173155	7.1458	8.94751e-13	2.48128e-11
Sbay_10.328	91.6845	0.797825	0.221591	3.60044	0.000317684	0.00163341
Sbay_10.330	51.5066	1.29195	0.313355	4.12295	3.74054e-05	0.000258132
Sbay_10.332	1633.92	1.4843	0.217611	6.82088	9.0483e-12	2.20323e-10
Sbay_10.333	385.597	0.505153	0.162295	3.11256	0.0018547	0.00744118
Sbay_10.334	1032.14	0.979091	0.138503	7.06908	1.55963e-12	4.22724e-11
Sbay_10.335	446.445	0.0135276	0.14261	0.0948571	0.924428	0.956856
Sbay_10.336	2073.92	0.0641529	0.147402	0.435223	0.6634	0.78041
Sbay_10.338	243.723	-0.0713045	0.185467	-0.384459	0.700638	0.807547
Sbay_10.339	484.555	0.0638697	0.185399	0.344499	0.730471	0.828227
Sbay_10.340	3125.39	-0.0589968	0.105274	-0.560414	0.575197	0.71216
Sbay_10.341	77.4089	-0.220906	0.320033	-0.69026	0.490031	0.635989
Sbay_10.342	274.068	0.312046	0.196593	1.58727	0.112452	0.215185
Sbay_10.343	0.446203	-1.87373	3.98335	-0.470391	0.638076	0.761008
Sbay_10.344	603.149	0.011967	0.144364	0.0828944	0.933936	0.962561
Sbay_10.345	1291.57	-0.05058	0.135128	-0.374311	0.708173	0.812947
Sbay_10.346	59928.9	-0.212694	0.189013	-1.12528	0.260469	0.406092
Sbay_10.347	1532.67	0.453285	0.123052	3.68368	0.00022989	0.00123946
Sbay_10.348	380.026	-1.08624	0.233292	-4.65615	3.22172e-06	2.81724e-05
Sbay_10.349	940.561	0.321131	0.173666	1.84913	0.0644387	0.138695
Sbay_10.350	208.748	-0.0277751	0.209342	-0.132678	0.894448	0.938637
Sbay_10.351	136.209	-0.761919	0.225439	-3.37971	0.000725613	0.00335891
Sbay_10.352	1117.8	-1.28607	0.177511	-7.24501	4.3242e-13	1.28865e-11
Sbay_10.353	0.771795	0.193914	2.11918	0.0915044	0.927092	0.958182
Sbay_10.354	10834.3	0.601141	0.155585	3.86375	0.00011166	0.00066828
Sbay_10.356	17565.2	0.299202	0.201516	1.48476	0.137608	0.250539
Sbay_10.357	30076.7	0.00562417	0.182808	0.0307654	0.975457	0.986991
Sbay_10.358	754.002	0.228858	0.162015	1.41258	0.15778	0.277972
Sbay_10.359	969.125	-0.144618	0.153993	-0.939125	0.347667	0.497735
Sbay_10.360	2446.63	-0.0797927	0.223576	-0.356893	0.721172	0.822353
Sbay_10.361	282.223	-1.39151	0.833732	-1.66901	0.0951151	0.188406
Sbay_10.362	7545.36	-0.563994	0.163708	-3.44511	0.000570817	0.00273317
Sbay_10.363	77.0544	0.110035	0.418439	0.262966	0.792577	0.871857
Sbay_10.364	444.477	0.564174	0.173096	3.25931	0.00111682	0.00482106
Sbay_10.365	230.571	1.94199	0.286372	6.78135	1.19059e-11	2.83002e-10
Sbay_10.366	611.224	0.124867	0.133601	0.93462	0.349984	0.500455
Sbay_10.367	4939.7	0.0074105	0.114262	0.0648552	0.948289	0.970154
Sbay_10.368	220.984	0.00785855	0.241848	0.0324938	0.974078	0.986539
Sbay_10.369	137.796	-0.182819	0.234203	-0.780601	0.435037	0.584731
Sbay_10.370	0	NA	NA	NA	NA	NA
Sbay_10.371	32.5144	-0.0600157	0.358898	-0.167222	0.867195	0.919055
Sbay_10.372	415.204	-0.0718497	0.164197	-0.437583	0.661689	0.779146
Sbay_10.373	325.325	-0.617007	0.210363	-2.93306	0.00335635	0.0122964
Sbay_10.374	665.672	0.235492	0.332672	0.707881	0.479019	0.62567
Sbay_10.375	605.538	-0.265052	0.124579	-2.12757	0.0333724	0.0818206
Sbay_10.376	546.306	-0.83101	0.283882	-2.92731	0.00341912	0.0124881
Sbay_10.377	32.1136	0.542325	0.338528	1.60201	0.109154	0.209764
Sbay_10.378	568.389	0.272513	0.132938	2.04993	0.0403717	0.0952073
Sbay_10.379	103.81	1.38862	0.235982	5.88446	3.99349e-09	6.14936e-08
Sbay_10.380	950.317	-0.0631751	0.156272	-0.404265	0.686018	0.796984
Sbay_10.381	7180.26	-1.01027	0.188052	-5.37226	7.77554e-08	9.52464e-07
Sbay_10.382	497.704	0.50632	0.17503	2.89277	0.00381863	0.0137959
Sbay_10.383	6221.28	-0.272421	0.124891	-2.18126	0.0291641	0.0733387
Sbay_10.384	191.466	0.463474	0.226311	2.04795	0.0405645	0.0955401
Sbay_10.385	474.579	0.436408	0.148968	2.92955	0.00339455	0.0124287
Sbay_10.386	854.57	-0.71323	0.203831	-3.49913	0.000466783	0.00230179
Sbay_10.387	775.449	0.273596	0.155278	1.76198	0.0780725	0.16238
Sbay_10.388	782.859	0.0628331	0.140282	0.447906	0.654221	0.77384
Sbay_10.389	7260.23	-0.0122374	0.180046	-0.0679681	0.945811	0.968895
Sbay_10.390	3290.28	-1.83577	0.250718	-7.32204	2.44231e-13	7.61951e-12
Sbay_10.391	797.772	-1.82159	0.344432	-5.2887	1.2319e-07	1.42453e-06
Sbay_10.392	384.427	0.40471	0.152675	2.6508	0.00803012	0.0254096
Sbay_10.393	510.236	0.999377	0.192451	5.19288	2.07063e-07	2.30541e-06
Sbay_10.394	7728.62	-0.891963	0.188477	-4.73249	2.21786e-06	1.99474e-05
Sbay_10.395	2992.12	0.155773	0.144116	1.08089	0.279748	0.428784
Sbay_10.396	0	NA	NA	NA	NA	NA
Sbay_10.397	1207.85	-0.747133	0.3627	-2.05992	0.0394064	0.0932244
Sbay_10.398	1.00366	-3.06336	2.01337	-1.52151	0.128132	0.237252
Sbay_10.399	15565.4	-0.100697	0.220426	-0.45683	0.647794	0.768221
Sbay_10.400	1127.31	0.256773	0.14205	1.80762	0.0706653	0.149888
Sbay_10.401	237.112	0.0284184	0.198024	0.14351	0.885887	0.932708
Sbay_10.402	1.40601	-0.237728	1.6295	-0.14589	0.884008	0.931507
Sbay_10.403	0.320671	0.777823	3.6559	0.212759	0.831515	0.895501
Sbay_10.404	1.20697	0.198247	2.19213	0.0904354	0.927941	0.958505
Sbay_10.405	1083.13	0.22044	0.133767	1.64794	0.0993659	0.19534
Sbay_10.406	551.78	-1.00264	0.176367	-5.68499	1.30817e-08	1.83943e-07
Sbay_10.407	491.097	-0.0433023	0.219708	-0.19709	0.843757	0.903648
Sbay_10.408	3443.99	0.797391	0.127091	6.27419	3.51458e-10	6.30309e-09
Sbay_10.409	38.5897	-0.684518	0.424133	-1.61392	0.106544	0.20607
Sbay_10.410	0	NA	NA	NA	NA	NA
Sbay_10.411	2173.2	0.19987	0.10428	1.91667	0.0552804	0.122233
Sbay_10.412	39.8269	0.219123	0.323434	0.677487	0.498097	0.64274
Sbay_10.413	168.618	0.388807	0.212556	1.8292	0.0673702	0.144124
Sbay_10.414	118.748	-0.831034	0.218302	-3.80681	0.000140769	0.000817853
Sbay_10.415	545.629	0.0289504	0.139292	0.20784	0.835354	0.898138
Sbay_10.416	293.54	0.148358	0.173879	0.853222	0.393536	0.54403
Sbay_10.417	609.308	-0.190969	0.128307	-1.48837	0.136653	0.249254
Sbay_10.418	178.299	0.980107	0.226603	4.32522	1.5238e-05	0.000114276
Sbay_10.419	994.601	0.366655	0.166132	2.20701	0.0273136	0.069578
Sbay_10.420	12266.6	-0.428001	0.138065	-3.1	0.0019352	0.00769711
Sbay_10.421	472.26	-0.269698	0.163844	-1.64607	0.0997502	0.195903
Sbay_10.422	7248.07	0.0786735	0.258031	0.3049	0.760442	0.850158
Sbay_10.423	0.327483	-1.46814	4.00786	-0.366315	0.71413	0.817072
Sbay_10.424	1377.8	-0.573741	0.164244	-3.49323	0.000477219	0.00235077
Sbay_10.425	22.1487	-0.0843624	0.455148	-0.185351	0.852953	0.91008
Sbay_10.426	947.1	-0.162323	0.133673	-1.21433	0.224621	0.362078
Sbay_10.427	786.307	-0.0710987	0.124733	-0.570009	0.568672	0.705235
Sbay_10.428	1212.32	-0.682332	0.148308	-4.60076	4.20947e-06	3.54638e-05
Sbay_10.429	0	NA	NA	NA	NA	NA
Sbay_10.430	7414.7	-0.0368633	0.150381	-0.245132	0.806354	0.881237
Sbay_10.431	0.126235	-0.183963	4.08047	-0.0450838	0.964041	NA
Sbay_10.432	1766.72	0.0364049	0.128882	0.282466	0.777586	0.860855
Sbay_10.433	550.092	0.765852	0.296859	2.57985	0.00988421	0.0300846
Sbay_10.435	1334.1	-0.209956	0.17846	-1.17649	0.239399	0.381688
Sbay_10.436	0.235396	-0.985169	4.00567	-0.245944	0.805726	NA
Sbay_10.437	45849.9	-0.213871	0.135558	-1.57771	0.114633	0.218193
Sbay_10.438	14.032	-0.593009	0.569892	-1.04056	0.298079	0.448503
Sbay_10.439	5866.3	-0.600218	0.144406	-4.15647	3.23201e-05	0.000225113
Sbay_10.441	19.0955	0.760535	0.53555	1.4201	0.155578	0.274496
Sbay_10.442	0	NA	NA	NA	NA	NA
Sbay_10.443	0.453718	-1.93585	3.21092	-0.602895	0.546578	0.687816
Sbay_10.444	0.218322	-0.892363	4.05642	-0.219988	0.82588	NA
Sbay_10.445	12601.1	-0.147209	0.127057	-1.15861	0.246615	0.389968
Sbay_10.446	2563.11	-0.349263	0.157662	-2.21526	0.0267419	0.0683671
Sbay_10.447	32.4625	0.359008	0.361071	0.994286	0.320084	0.471197
Sbay_10.448	2841.06	-0.447675	0.116396	-3.84614	0.000119995	0.000713277
Sbay_10.449	362.114	1.00658	0.272934	3.68799	0.000226029	0.00122305
Sbay_10.450	7.19423	0.991187	0.772924	1.28239	0.199707	0.33183
Sbay_10.451	1288.17	0.589218	0.174169	3.38303	0.000716905	0.00332116
Sbay_10.452	927.663	0.887582	0.121129	7.32755	2.34401e-13	7.4289e-12
Sbay_10.453	798.452	-0.130906	0.158421	-0.826314	0.408626	0.558828
Sbay_10.454	340.317	-0.188877	0.213244	-0.885729	0.375764	0.526878
Sbay_10.455	22074.7	-0.233545	0.167797	-1.39183	0.163974	0.285691
Sbay_10.456	9751.59	-0.603873	0.231775	-2.60543	0.00917603	0.0282739
Sbay_10.457	435.732	-0.0475361	0.143977	-0.330164	0.741276	0.835903
Sbay_10.458	734.405	-0.426977	0.138416	-3.08474	0.00203729	0.00801797
Sbay_10.459	9545.69	0.484136	0.317578	1.52446	0.127394	0.236397
Sbay_10.461	319.884	-0.134859	0.1933	-0.697665	0.485387	0.631783
Sbay_10.462	504.549	-0.529846	0.168615	-3.14234	0.00167601	0.00684809
Sbay_10.463	204.373	0.253535	0.192198	1.31913	0.187125	0.316007
Sbay_10.464	476.799	0.343733	0.13067	2.63054	0.00852483	0.0266249
Sbay_10.465	379.896	-0.762166	0.163339	-4.66616	3.06885e-06	2.69142e-05
Sbay_10.466	239.409	-0.242169	0.261802	-0.925012	0.35496	0.505749
Sbay_10.467	926.7	-1.37771	0.310716	-4.43399	9.25045e-06	7.24316e-05
Sbay_10.468	7.60907	-0.469571	0.701278	-0.669593	0.503117	0.647962
Sbay_10.469	1.36151	-1.04984	1.62899	-0.644473	0.519269	0.661918
Sbay_10.470	1.59249	-1.43359	1.67161	-0.857612	0.391107	0.542041
Sbay_10.471	0.508979	-0.302276	3.22567	-0.0937094	0.92534	0.957469
Sbay_10.472	16.2521	-1.17761	0.561716	-2.09645	0.036042	0.0872143
Sbay_10.474	8.93511	-0.83602	0.693188	-1.20605	0.227798	0.366072
Sbay_10.475	3.14334	-0.803147	1.17511	-0.683466	0.494312	0.640063
Sbay_10.476	0.768261	-2.67213	2.19774	-1.21585	0.22404	0.361433
Sbay_10.477	0	NA	NA	NA	NA	NA
Sbay_10.478	0.27497	-1.17782	3.82529	-0.307904	0.758155	NA
Sbay_10.479	60.0338	-0.660152	0.531764	-1.24144	0.214444	0.350387
Sbay_10.480	3.89735	-0.378902	0.98039	-0.38648	0.699141	0.806598
Sbay_10.481	0	NA	NA	NA	NA	NA
Sbay_10.482	8.63452	-0.0236787	0.662262	-0.0357543	0.971478	0.985434
Sbay_10.483	4113.46	-0.587193	0.170711	-3.43968	0.000582395	0.00277751
Sbay_10.484	225.967	0.700418	0.201231	3.48067	0.000500167	0.00245839
Sbay_10.485	900.049	0.300815	0.127569	2.35805	0.0183712	0.0501794
Sbay_10.486	1573.95	0.000965303	0.116168	0.00830953	0.99337	0.995364
Sbay_10.487	1104.29	-0.523324	0.13221	-3.95828	7.54903e-05	0.000479012
Sbay_10.489	964.684	-0.802995	0.199839	-4.0182	5.86436e-05	0.00038307
Sbay_10.490	937.484	-0.341111	0.126361	-2.69949	0.00694457	0.022449
Sbay_10.491	1881.79	-0.826243	0.171606	-4.81476	1.47374e-06	1.36864e-05
Sbay_10.492	108.452	0.486216	0.22696	2.1423	0.0321697	0.0797254
Sbay_10.493	2.71405	1.43607	1.16144	1.23646	0.216287	0.352054
Sbay_10.494	6.37665	1.27693	0.774598	1.64851	0.0992475	0.19525
Sbay_10.495	0	NA	NA	NA	NA	NA
Sbay_10.496	2447.49	0.0758539	0.120936	0.627222	0.530514	0.672546
Sbay_10.497	329.24	0.9065	0.174876	5.18366	2.17573e-07	2.40898e-06
Sbay_10.498	65.472	-0.1206	0.292599	-0.412169	0.680216	0.793166
Sbay_10.499	1591.69	1.16641	0.124544	9.36545	7.57255e-21	9.25706e-19
Sbay_10.500	340.209	0.306526	0.200237	1.53082	0.125815	0.234629
Sbay_10.501	1336.17	-0.225855	0.160832	-1.40429	0.160232	0.281219
Sbay_10.502	58.6977	-0.0202297	0.368635	-0.0548773	0.956236	0.975632
Sbay_10.503	748.913	-0.277219	0.197507	-1.40359	0.160442	0.281501
Sbay_10.504	803.38	-0.01617	0.139688	-0.115757	0.907845	0.947107
Sbay_10.505	7009.85	-0.501488	0.169452	-2.95946	0.00308179	0.0114091
Sbay_10.506	2478.56	0.113033	0.183876	0.614725	0.538737	0.680521
Sbay_10.507	340.695	1.03735	0.173265	5.98707	2.13658e-09	3.44035e-08
Sbay_10.508	6105.6	-0.51806	0.100599	-5.14977	2.60809e-07	2.82529e-06
Sbay_10.509	956.631	-0.12638	0.154144	-0.819879	0.412285	0.562549
Sbay_10.510	316.154	-0.769961	0.195146	-3.94557	7.96116e-05	0.000498822
Sbay_10.511	497.646	-1.09776	0.231078	-4.75061	2.02807e-06	1.83506e-05
Sbay_10.512	3087.08	-1.63843	0.249034	-6.57913	4.73203e-11	1.01232e-09
Sbay_10.513	894.335	-0.35532	0.155397	-2.28652	0.0222237	0.0588765
Sbay_10.514	218.679	-0.00573605	0.215281	-0.0266445	0.978743	0.988789
Sbay_10.515	1066.44	0.446678	0.115817	3.85675	0.000114906	0.000686228
Sbay_10.516	5776.4	-1.08492	0.170662	-6.35713	2.05563e-10	3.85995e-09
Sbay_10.517	1979.4	-0.438047	0.213758	-2.04926	0.0404365	0.0953225
Sbay_10.518	28.7269	-1.6254	0.541035	-3.00423	0.0026625	0.0100458
Sbay_10.519	1642.1	-1.44508	0.157163	-9.19483	3.75586e-20	3.8789e-18
Sbay_10.520	171.253	-0.219149	0.187272	-1.17022	0.241913	0.384672
Sbay_10.521	269.391	0.0851549	0.190538	0.446917	0.654935	0.773856
Sbay_10.522	7497.16	-0.265026	0.137696	-1.92471	0.0542653	0.120478
Sbay_10.523	1.97148	-1.82686	1.55358	-1.17591	0.239633	0.381857
Sbay_10.524	169.746	0.513379	0.262009	1.9594	0.0500664	0.112701
Sbay_10.525	1277.82	-0.113345	0.230055	-0.492688	0.622233	0.748205
Sbay_10.526	2381.09	-0.0669552	0.104636	-0.639884	0.522248	0.663893
Sbay_10.527	6718.99	-2.45531	0.199828	-12.2871	1.06292e-34	7.36222e-32
Sbay_10.528	244.702	0.356002	0.18423	1.93238	0.053313	0.118804
Sbay_10.529	156.176	-0.308062	0.280053	-1.10001	0.271326	0.419418
Sbay_10.530	5861.41	0.762128	0.22179	3.43627	0.000589793	0.00280338
Sbay_10.531	2.44855	-0.496191	1.57628	-0.314786	0.752924	0.845363
Sbay_10.532	1254.66	-0.215981	0.194385	-1.1111	0.266526	0.413706
Sbay_10.533	956.461	0.0946539	0.120355	0.786457	0.4316	0.581616
Sbay_10.534	606.886	0.305415	0.168869	1.80859	0.0705144	0.149674
Sbay_10.535	0.245865	1.73959	4.08047	0.426321	0.669874	NA
Sbay_10.536	889.029	0.246127	0.170982	1.43949	0.150012	0.267194
Sbay_10.537	2289.43	0.0126918	0.17987	0.0705612	0.943747	0.967413
Sbay_10.538	1341.13	-0.849002	0.121011	-7.01589	2.28486e-12	6.00278e-11
Sbay_10.539	325.725	0.180967	0.169004	1.07079	0.284265	0.432939
Sbay_10.540	289.754	-0.0447294	0.186624	-0.239677	0.810581	0.884082
Sbay_10.541	0.977383	-0.252317	1.83203	-0.137725	0.890458	0.935584
Sbay_10.542	232.985	0.107848	0.157957	0.682768	0.494753	0.640357
Sbay_10.543	197.487	0.0227296	0.200583	0.113318	0.909779	0.947828
Sbay_10.544	723.093	0.0322626	0.137398	0.234811	0.814356	0.886102
Sbay_10.545	2868.68	0.346914	0.1124	3.08641	0.00202586	0.00798349
Sbay_10.546	1549.16	0.17696	0.137668	1.28541	0.19865	0.330808
Sbay_10.547	460.998	-0.0728596	0.17768	-0.410061	0.681761	0.794195
Sbay_10.549	3008.32	-0.542382	0.321202	-1.6886	0.0912954	0.182713
Sbay_10.550	793.719	-0.156299	0.182979	-0.854191	0.392999	0.543719
Sbay_10.551	315.257	-0.485504	0.351635	-1.3807	0.16737	0.290654
Sbay_10.552	1860.38	-0.832372	0.153946	-5.40692	6.41163e-08	8.06842e-07
Sbay_10.553	301.771	-0.0599744	0.16246	-0.369164	0.712006	0.815813
Sbay_10.555	6862.67	-0.428	0.194498	-2.20054	0.0277686	0.0705701
Sbay_10.556	537.678	0.335926	0.147218	2.28183	0.0224994	0.0593706
Sbay_10.557	1594.98	1.04132	0.17525	5.94191	2.81725e-09	4.41762e-08
Sbay_10.558	713.602	-0.219488	0.147623	-1.48682	0.137063	0.249774
Sbay_10.559	35222.8	0.148189	0.149553	0.990875	0.321747	0.472832
Sbay_10.560	635.748	0.00212209	0.167128	0.0126974	0.989869	0.992853
Sbay_10.561	233.419	-0.369051	0.168822	-2.18604	0.0288123	0.0726983
Sbay_10.562	0.757314	-1.24832	2.9049	-0.429729	0.667393	0.782785
Sbay_10.563	0.367056	-1.6151	3.44125	-0.469334	0.638831	0.76136
Sbay_10.564	333.159	-0.170731	0.297361	-0.574156	0.565863	0.703219
Sbay_10.565	6070	0.166439	0.165442	1.00603	0.314401	0.465233
Sbay_10.566	10169.5	-0.218417	0.146688	-1.48899	0.136489	0.249031
Sbay_10.567	3068.81	-0.567574	0.234647	-2.41884	0.0155699	0.0436424
Sbay_10.568	673.101	-0.162294	0.14268	-1.13747	0.255343	0.399976
Sbay_10.569	448.767	-0.139185	0.255887	-0.543932	0.586488	0.720628
Sbay_10.571	177.644	-0.550696	0.20141	-2.7342	0.00625311	0.020694
Sbay_10.572	38.0757	-0.856053	0.369878	-2.31442	0.0206446	0.0552845
Sbay_10.573	1688.86	-0.0497749	0.150347	-0.331066	0.740595	0.835588
Sbay_10.574	0.572438	-2.23177	3.0426	-0.733508	0.463248	0.611307
Sbay_10.575	0.833184	3.58259	2.66999	1.3418	0.179661	0.306777
Sbay_10.576	335.854	-1.15584	0.153047	-7.55218	4.28047e-14	1.52619e-12
Sbay_10.577	103.448	-0.264586	0.231092	-1.14494	0.252234	0.396038
Sbay_10.578	92.5721	-0.436873	0.309877	-1.40983	0.15859	0.279234
Sbay_10.579	340.342	-0.601785	0.196603	-3.06092	0.00220661	0.00856616
Sbay_10.580	564.788	3.3069	0.204749	16.151	1.11698e-58	3.34535e-55
Sbay_101.1	849.719	0.765763	0.224065	3.4176	0.000631767	0.00297507
Sbay_104.1	272.927	-0.47925	0.194415	-2.46509	0.0136979	0.0393716
Sbay_106.1	31.3431	2.22212	0.438417	5.06851	4.00948e-07	4.17683e-06
Sbay_108.1	398.192	-0.984612	0.188589	-5.22093	1.78022e-07	2.00066e-06
Sbay_109.1	1.65464	-1.55054	1.54409	-1.00417	0.315294	0.466209
Sbay_11.1	115.395	1.81002	0.361043	5.0133	5.35042e-07	5.39546e-06
Sbay_11.2	3053.2	1.45637	0.353542	4.11937	3.79916e-05	0.000261274
Sbay_11.3	614.35	2.44348	0.354119	6.90017	5.19412e-12	1.29637e-10
Sbay_11.4	757.945	0.139057	0.225029	0.617952	0.536607	0.678404
Sbay_11.5	658.282	0.318408	0.14424	2.20748	0.0272807	0.0695367
Sbay_11.6	791.629	0.103822	0.134598	0.771351	0.440499	0.589497
Sbay_11.7	1865.6	0.184296	0.16047	1.14848	0.250771	0.394361
Sbay_11.8	2713.61	-0.235231	0.111841	-2.10325	0.0354436	0.0862615
Sbay_11.9	1249.59	0.0572118	0.171003	0.334567	0.737952	0.833868
Sbay_11.10	5132.96	-0.0617584	0.129164	-0.478139	0.632552	0.756737
Sbay_11.11	57.9854	0.466703	0.338422	1.37906	0.167877	0.291211
Sbay_11.12	0	NA	NA	NA	NA	NA
Sbay_11.13	244.465	0.484132	0.171061	2.83018	0.00465216	0.0163344
Sbay_11.14	1613.86	0.540675	0.141907	3.81006	0.000138936	0.000811927
Sbay_11.15	868.122	-0.157176	0.14534	-1.08144	0.279503	0.428628
Sbay_11.17	583.069	-0.402136	0.20139	-1.99681	0.0458463	0.105218
Sbay_11.19	1398.2	0.263434	0.160665	1.63965	0.101078	0.197603
Sbay_11.20	634.118	-0.326489	0.150393	-2.17091	0.0299382	0.0750648
Sbay_11.21	3239.97	-0.189493	0.186432	-1.01642	0.309429	0.460035
Sbay_11.22	16.527	0.107187	0.492501	0.217638	0.827711	0.893567
Sbay_11.24	192.383	0.891152	0.265433	3.35735	0.00078693	0.00358407
Sbay_11.25	110.416	0.702963	0.203564	3.45327	0.000553829	0.00266247
Sbay_11.26	8.57436	-2.77253	0.843208	-3.28807	0.00100878	0.00443005
Sbay_11.27	1959.43	0.395369	0.150011	2.63561	0.00839873	0.0263257
Sbay_11.28	7705.33	0.979563	0.15298	6.40319	1.52159e-10	2.91193e-09
Sbay_11.29	952.269	1.08183	0.1404	7.70538	1.30459e-14	5.00929e-13
Sbay_11.30	1595.34	0.139484	0.107056	1.30291	0.192607	0.32326
Sbay_11.31	2086.21	0.897562	0.150003	5.98364	2.18208e-09	3.50419e-08
Sbay_11.32	230.47	0.437219	0.296452	1.47484	0.140256	0.253817
Sbay_11.33	1450.84	0.21184	0.128615	1.64708	0.0995408	0.19562
Sbay_11.34	0	NA	NA	NA	NA	NA
Sbay_11.35	371.424	-0.18035	0.140196	-1.28641	0.198301	0.330593
Sbay_11.36	173.046	0.898648	0.269421	3.33548	0.000851526	0.00382931
Sbay_11.37	281.927	0.843842	0.437884	1.92709	0.0539682	0.120041
Sbay_11.38	828.285	0.170637	0.122393	1.39418	0.163265	0.284703
Sbay_11.39	1784.68	0.533931	0.237182	2.25114	0.0243765	0.0633747
Sbay_11.40	1607.93	-0.72401	0.157062	-4.60972	4.03208e-06	3.41132e-05
Sbay_11.41	560.237	0.601779	0.137267	4.38399	1.16524e-05	8.95997e-05
Sbay_11.42	6003.09	-0.441663	0.16427	-2.68864	0.00717445	0.0230676
Sbay_11.43	3146.3	0.742726	0.202017	3.67654	0.000236417	0.00127008
Sbay_11.44	17636.6	0.118915	0.137282	0.866209	0.386376	0.537506
Sbay_11.45	879.159	0.405108	0.142182	2.84921	0.00438277	0.0155526
Sbay_11.46	19.8042	0.613976	0.650204	0.944282	0.345025	0.49585
Sbay_11.47	890.281	-0.316971	0.160348	-1.97677	0.0480681	0.10894
Sbay_11.48	1237.78	-0.256815	0.16019	-1.60319	0.108893	0.209532
Sbay_11.49	477.863	0.548383	0.227317	2.41242	0.0158472	0.0443366
Sbay_11.50	1458.44	-0.0814213	0.1736	-0.469015	0.639059	0.76148
Sbay_11.51	1586.86	0.115068	0.2983	0.385745	0.699686	0.807002
Sbay_11.52	481.841	0.124065	0.239046	0.519002	0.603759	0.734766
Sbay_11.53	2102.13	1.45138	0.12549	11.5657	6.14563e-31	3.0677e-28
Sbay_11.54	730.442	-0.124972	0.163707	-0.76339	0.445231	0.594368
Sbay_11.55	1233.02	0.965536	0.157235	6.14071	8.21554e-10	1.42229e-08
Sbay_11.56	553.372	-0.126904	0.147566	-0.859984	0.389798	0.540985
Sbay_11.57	23.3904	-0.61587	0.477176	-1.29065	0.196823	0.328954
Sbay_11.58	159.685	0.247301	0.249837	0.989849	0.322248	0.473061
Sbay_11.59	0	NA	NA	NA	NA	NA
Sbay_11.60	7030.03	-0.750597	0.145492	-5.15903	2.48239e-07	2.70354e-06
Sbay_11.61	994.187	0.176882	0.197925	0.893681	0.371492	0.522725
Sbay_11.62	664.078	-0.178402	0.175805	-1.01477	0.310215	0.460481
Sbay_11.63	18.5169	1.55061	0.577217	2.68635	0.00722369	0.023201
Sbay_11.64	368.013	-0.182737	0.186342	-0.98065	0.326766	0.477629
Sbay_11.65	2294.38	-2.70099	0.166573	-16.2151	3.94603e-59	2.36367e-55
Sbay_11.66	1226.66	-0.165801	0.164484	-1.00801	0.313451	0.464286
Sbay_11.67	606.797	1.52723	0.191177	7.98861	1.36472e-15	6.01077e-14
Sbay_11.68	75.9785	0.735579	0.289699	2.53911	0.0111134	0.0332017
Sbay_11.69	4261.08	0.730152	0.110431	6.61181	3.79645e-11	8.4225e-10
Sbay_11.70	4636.65	-0.586085	0.127006	-4.61462	3.93822e-06	3.34135e-05
Sbay_11.71	1345.29	0.387781	0.140858	2.753	0.00590526	0.0197391
Sbay_11.72	489.345	-0.24569	0.24671	-0.995867	0.319315	0.470297
Sbay_11.73	0.235396	-0.985169	4.00567	-0.245944	0.805726	NA
Sbay_11.74	97191.1	0.310171	0.155971	1.98864	0.0467407	0.106699
Sbay_11.75	3624.17	0.0473078	0.121971	0.387862	0.698118	0.805728
Sbay_11.76	11309.9	-0.0865401	0.161825	-0.534776	0.592805	0.726453
Sbay_11.77	539.13	0.306458	0.193987	1.57978	0.114157	0.217494
Sbay_11.78	7327.03	-1.17224	0.159046	-7.37047	1.70028e-13	5.41739e-12
Sbay_11.79	1227.89	-0.388531	0.209432	-1.85517	0.0635721	0.137175
Sbay_11.80	4288.94	0.299198	0.143717	2.08185	0.0373561	0.0894992
Sbay_11.81	241.248	-0.268733	0.265314	-1.01288	0.311115	0.461282
Sbay_11.82	457.178	0.209474	0.290821	0.720285	0.47135	0.619027
Sbay_11.83	11132	0.297742	0.122856	2.4235	0.0153716	0.0432078
Sbay_11.84	2973.97	-0.836083	0.167662	-4.98673	6.141e-07	6.07006e-06
Sbay_11.85	571.945	-0.00653993	0.172845	-0.0378369	0.969818	0.984612
Sbay_11.86	520.765	-0.580945	0.179502	-3.23642	0.00121038	0.00517499
Sbay_11.87	278.558	-0.427756	0.153186	-2.79239	0.00523208	0.0178576
Sbay_11.88	2865.88	0.71161	0.144334	4.93031	8.20981e-07	8.02231e-06
Sbay_11.89	826.061	0.488686	0.139015	3.51533	0.0004392	0.00218687
Sbay_11.90	1160.25	-0.0624913	0.112817	-0.553917	0.579636	0.715585
Sbay_11.91	525.461	0.392622	0.131338	2.98939	0.00279537	0.0104848
Sbay_11.92	290.396	0.371008	0.250878	1.47884	0.139183	0.252498
Sbay_11.93	219.831	0.157191	0.172829	0.909518	0.363077	0.514387
Sbay_11.94	280.949	-0.273784	0.213331	-1.28338	0.19936	0.331436
Sbay_11.95	866.927	-0.0645588	0.22168	-0.291225	0.770879	0.855955
Sbay_11.96	684.47	0.0662752	0.124352	0.532963	0.594059	0.727556
Sbay_11.97	0	NA	NA	NA	NA	NA
Sbay_11.98	865.321	0.187354	0.169908	1.10268	0.270166	0.418056
Sbay_11.99	3277.26	0.152426	0.106881	1.42614	0.153829	0.272373
Sbay_11.100	660.385	-0.206237	0.244079	-0.844959	0.398134	0.548457
Sbay_11.101	452.721	-0.466863	0.161686	-2.88747	0.00388356	0.0139967
Sbay_11.102	626.991	0.34281	0.193723	1.76959	0.0767954	0.16056
Sbay_11.103	692.778	-0.0894839	0.169613	-0.527578	0.597792	0.730771
Sbay_11.104	324.35	-0.56422	0.247864	-2.27633	0.0228263	0.0599954
Sbay_11.105	887.475	-0.142867	0.13298	-1.07435	0.282666	0.431271
Sbay_11.106	0	NA	NA	NA	NA	NA
Sbay_11.107	6446.43	0.354391	0.156214	2.26862	0.0232916	0.061031
Sbay_11.108	889.129	-0.923623	0.146127	-6.32071	2.60371e-10	4.76948e-09
Sbay_11.109	7.18129	-1.65438	0.758813	-2.18022	0.0292409	0.073501
Sbay_11.110	906.978	1.09671	0.236087	4.64535	3.395e-06	2.93874e-05
Sbay_11.111	273.485	0.363584	0.217607	1.67083	0.0947548	0.187941
Sbay_11.112	1718.51	-0.717198	0.160347	-4.47279	7.72072e-06	6.1012e-05
Sbay_11.113	275.912	0.124921	0.290033	0.430712	0.666677	0.782211
Sbay_11.114	9813.19	0.0719132	0.180116	0.399261	0.689701	0.79975
Sbay_11.115	85.1436	0.0776746	0.236169	0.328895	0.742235	0.836723
Sbay_11.116	43.0076	0.50132	0.359918	1.39288	0.163657	0.285222
Sbay_11.117	0.967037	-1.59148	2.34646	-0.678247	0.497615	0.642257
Sbay_11.118	228.242	-0.083758	0.16959	-0.493886	0.621387	0.747561
Sbay_11.119	664.084	0.395126	0.157626	2.50674	0.0121851	0.0357612
Sbay_11.120	3283.69	0.176032	0.146011	1.20561	0.227969	0.366095
Sbay_11.121	4261.07	-0.218711	0.206663	-1.0583	0.28992	0.438652
Sbay_11.122	1.01627	2.66833	1.99894	1.33487	0.181919	0.309396
Sbay_11.123	854.476	-0.489768	0.230378	-2.12594	0.0335086	0.0820927
Sbay_11.124	1082.84	-0.577036	0.246757	-2.33848	0.0193626	0.0524094
Sbay_11.125	786.589	-0.262215	0.267557	-0.980033	0.32707	0.477841
Sbay_11.126	188.136	0.271029	0.247481	1.09515	0.273451	0.42194
Sbay_11.127	469.237	0.610888	0.336999	1.81273	0.0698733	0.148472
Sbay_11.128	10.5872	-0.467071	0.688273	-0.678614	0.497383	0.642234
Sbay_11.129	4423.97	-1.63175	0.305646	-5.33869	9.36198e-08	1.12095e-06
Sbay_11.130	282.538	0.0526093	0.24559	0.214215	0.830379	0.89476
Sbay_11.131	1865.05	0.309594	0.133724	2.31517	0.0206034	0.0552438
Sbay_11.132	377.716	-0.443639	0.260026	-1.70613	0.0879832	0.177567
Sbay_11.133	610.012	-0.209156	0.16254	-1.2868	0.198165	0.330593
Sbay_11.134	2740.75	-0.314215	0.191052	-1.64466	0.10004	0.196151
Sbay_11.135	179.42	-0.497946	0.196518	-2.53385	0.0112817	0.0335873
Sbay_11.136	222.447	0.0796035	0.183607	0.433555	0.664612	0.781206
Sbay_11.137	1439.61	0.535295	0.156029	3.43074	0.000601948	0.00285033
Sbay_11.138	2936.27	0.764675	0.197299	3.87572	0.000106308	0.000641275
Sbay_11.139	247.605	-0.565167	0.374845	-1.50774	0.131622	0.241994
Sbay_11.140	6992.18	-0.724926	0.184433	-3.93057	8.47462e-05	0.000526587
Sbay_11.141	83.0509	-0.0861399	0.243012	-0.354467	0.722989	0.823641
Sbay_11.142	1122.82	0.271194	0.319353	0.849197	0.395771	0.54586
Sbay_11.143	26438.9	-0.408085	0.143968	-2.83455	0.004589	0.0161694
Sbay_11.144	4009.68	-0.160834	0.130039	-1.23681	0.216156	0.351936
Sbay_11.145	502.471	-0.435381	0.141957	-3.06699	0.00216228	0.00842687
Sbay_11.146	284.546	-0.13348	0.386642	-0.34523	0.729921	0.827917
Sbay_11.147	2425.52	0.0728472	0.146336	0.497806	0.618621	0.745431
Sbay_11.148	647.764	-0.198848	0.163508	-1.21613	0.223934	0.361359
Sbay_11.149	541.571	0.388102	0.143925	2.69655	0.00700622	0.0226117
Sbay_11.150	1173.17	0.352716	0.156385	2.25543	0.0241061	0.06289
Sbay_11.151	113.089	0.448509	0.328842	1.36391	0.172597	0.297684
Sbay_11.152	0.109161	-0.183963	4.08047	-0.0450838	0.964041	NA
Sbay_11.153	335.084	0.282692	0.175093	1.61453	0.106413	0.205883
Sbay_11.154	0.126235	-0.183963	4.08047	-0.0450838	0.964041	NA
Sbay_11.155	228.193	1.38393	0.350016	3.9539	7.68883e-05	0.000485502
Sbay_11.156	1103.31	-0.00447154	0.186119	-0.0240251	0.980833	0.989739
Sbay_11.157	0	NA	NA	NA	NA	NA
Sbay_11.158	2917.05	-0.28873	0.276468	-1.04435	0.296323	0.44622
Sbay_11.159	39.6818	-0.523825	0.373545	-1.40231	0.160823	0.281758
Sbay_11.160	3032.73	-0.127086	0.209708	-0.606012	0.544507	0.685752
Sbay_11.161	2497.9	-0.269789	0.112091	-2.40686	0.0160901	0.0448488
Sbay_11.162	631.592	0.320047	0.186977	1.71169	0.0869541	0.176024
Sbay_11.163	5.85742	-0.38649	0.830787	-0.465209	0.641782	0.763612
Sbay_11.164	1974.68	-1.71639	0.306959	-5.5916	2.24983e-08	3.06284e-07
Sbay_11.165	304.469	0.0669157	0.161367	0.414681	0.678375	0.791439
Sbay_11.166	192978	0.50776	0.137758	3.68589	0.000227908	0.00122988
Sbay_11.167	415.024	-0.0300115	0.135003	-0.222303	0.824078	0.891832
Sbay_11.168	1036.36	0.290636	0.150927	1.92567	0.0541453	0.120301
Sbay_11.169	715.296	-0.972104	0.173901	-5.58998	2.2709e-08	3.08451e-07
Sbay_11.170	17714.5	-0.519588	0.156527	-3.31948	0.000901859	0.00401945
Sbay_11.171	7.42035	0.259056	0.732352	0.353731	0.72354	0.824112
Sbay_11.172	4721.33	-0.416438	0.11373	-3.66165	0.000250599	0.00133075
Sbay_11.173	1619.08	1.03611	0.144477	7.17144	7.42113e-13	2.10676e-11
Sbay_11.174	1655.23	-0.108359	0.144034	-0.752315	0.451862	0.600677
Sbay_11.175	2953.61	-1.2933	0.250503	-5.16279	2.43296e-07	2.65454e-06
Sbay_11.176	504.018	0.258953	0.129393	2.00129	0.0453609	0.104545
Sbay_11.177	190.029	0.354208	0.170574	2.07656	0.0378422	0.0903371
Sbay_11.178	68.231	-0.242954	0.262866	-0.924248	0.355357	0.506084
Sbay_11.179	374.819	-0.208005	0.155583	-1.33693	0.181244	0.308599
Sbay_11.180	1109.02	0.292136	0.153442	1.90388	0.0569255	0.12527
Sbay_11.181	315.033	-0.593521	0.256448	-2.31439	0.0206463	0.0552845
Sbay_11.182	199.745	-1.49555	1.02154	-1.46401	0.143192	0.257729
Sbay_11.183	189.898	0.312903	0.236386	1.32369	0.185605	0.313882
Sbay_11.184	540.598	0.357635	0.156914	2.27917	0.0226567	0.0595757
Sbay_11.185	1076.22	0.00325061	0.112712	0.0288398	0.976992	0.987877
Sbay_11.186	3442.69	0.00629251	0.165961	0.0379156	0.969755	0.984612
Sbay_11.187	571.669	-0.84858	0.218782	-3.87865	0.000105038	0.000634891
Sbay_11.188	38885.3	0.0476355	0.212821	0.223829	0.82289	0.89134
Sbay_11.189	781.168	-0.310337	0.165093	-1.87976	0.0601404	0.131283
Sbay_11.190	1296.41	0.516516	0.160683	3.2145	0.00130674	0.00550694
Sbay_11.191	510.143	-0.394373	0.148808	-2.65022	0.00804399	0.025432
Sbay_11.192	0.148734	-0.183963	4.08047	-0.0450838	0.964041	NA
Sbay_11.193	573.395	-0.647414	0.179034	-3.61615	0.000299021	0.00155346
Sbay_11.195	1322.46	1.13097	0.280382	4.03368	5.49106e-05	0.000361048
Sbay_11.197	811.744	0.0111124	0.175063	0.0634766	0.949387	0.971111
Sbay_11.198	453.34	-0.384456	0.163962	-2.34479	0.019038	0.0517412
Sbay_11.199	580.544	-0.999748	0.171486	-5.82992	5.5455e-09	8.34612e-08
Sbay_11.200	331.494	-0.390891	0.186874	-2.09174	0.0364618	0.0879252
Sbay_11.201	688.626	0.0360364	0.1303	0.276564	0.782115	0.863252
Sbay_11.202	1717.04	0.255437	0.126512	2.01908	0.0434791	0.101085
Sbay_11.203	559.351	0.469329	0.153109	3.06533	0.0021743	0.00846268
Sbay_11.204	264.855	0.147449	0.179126	0.823157	0.410418	0.560384
Sbay_11.205	857.488	-0.079088	0.251593	-0.314349	0.753256	0.845578
Sbay_11.207	1681.13	-0.282515	0.13066	-2.16221	0.0306017	0.0762814
Sbay_11.208	615.985	0.239374	0.136376	1.75524	0.0792178	0.163852
Sbay_11.209	299.006	-0.0976562	0.18456	-0.529131	0.596714	0.729602
Sbay_11.210	388.101	0.0520502	0.150717	0.345351	0.72983	0.827917
Sbay_11.211	436.538	-0.534904	0.161614	-3.30977	0.000933733	0.00415223
Sbay_11.212	5564.11	-1.39215	0.194305	-7.16477	7.79164e-13	2.20151e-11
Sbay_11.213	682.63	-1.20757	0.214402	-5.63226	1.77866e-08	2.45488e-07
Sbay_11.214	764.622	-0.48673	0.288523	-1.68697	0.0916094	0.183158
Sbay_11.215	2937.99	0.106708	0.131485	0.811561	0.417044	0.566332
Sbay_11.216	487.492	-0.309804	0.139574	-2.21963	0.0264437	0.0677783
Sbay_11.217	240.293	-0.0316767	0.201179	-0.157455	0.874886	0.924426
Sbay_11.218	1413.17	-0.441119	0.117926	-3.74065	0.000183544	0.00102654
Sbay_11.219	1874.3	-0.928913	0.229983	-4.03905	5.36688e-05	0.000353659
Sbay_11.220	1157.94	-1.07666	0.13797	-7.80357	6.01811e-15	2.37161e-13
Sbay_11.221	1997.42	0.0374561	0.115519	0.324241	0.745756	0.839834
Sbay_11.222	472.234	0.0856614	0.159594	0.536745	0.591444	0.72523
Sbay_11.223	17701.3	-0.28522	0.128094	-2.22665	0.0259707	0.0668232
Sbay_11.224	427.322	0.341453	0.161246	2.1176	0.0342092	0.0835358
Sbay_11.225	386.322	0.0494788	0.208355	0.237473	0.81229	0.884952
Sbay_11.226	1802.7	1.0072	0.14032	7.17785	7.08176e-13	2.03941e-11
Sbay_11.227	1213.61	0.237702	0.148306	1.60278	0.108983	0.209615
Sbay_11.228	356.182	-3.13197	0.385442	-8.12566	4.44924e-16	2.0985e-14
Sbay_11.229	0	NA	NA	NA	NA	NA
Sbay_11.231	3883.64	0.264856	0.116447	2.27448	0.022937	0.0602072
Sbay_11.232	1340.97	0.0333526	0.113002	0.295152	0.767878	0.85432
Sbay_11.233	540.721	-0.242366	0.14032	-1.72723	0.0841258	0.171224
Sbay_11.235	130.19	-0.794625	0.231078	-3.43878	0.000584349	0.00278239
Sbay_11.236	451.988	0.272493	0.160163	1.70135	0.0888765	0.178828
Sbay_11.237	3103.07	1.38185	0.115226	11.9925	3.89116e-33	2.33081e-30
Sbay_11.238	479.457	0.497274	0.164093	3.03044	0.00244198	0.00934067
Sbay_11.239	716.507	-0.701116	0.129213	-5.42603	5.76213e-08	7.31253e-07
Sbay_11.240	166.497	0.575396	0.285333	2.01658	0.0437393	0.101471
Sbay_11.241	0	NA	NA	NA	NA	NA
Sbay_11.242	200.962	-0.827609	0.215927	-3.83281	0.000126688	0.000748382
Sbay_11.243	1055.02	-0.567667	0.161074	-3.52426	0.000424675	0.00212337
Sbay_11.244	0.8681	-0.220231	2.2711	-0.0969708	0.92275	0.955823
Sbay_11.245	213.008	1.62336	0.24538	6.61569	3.69822e-11	8.23507e-10
Sbay_11.246	1542.97	0.225887	0.132388	1.70625	0.0879607	0.177567
Sbay_11.247	37.7712	0.852254	0.364203	2.34005	0.019281	0.052212
Sbay_11.248	5028.03	-1.18385	0.18807	-6.29476	3.07872e-10	5.58835e-09
Sbay_11.249	210.891	-0.417482	0.181758	-2.29691	0.0216236	0.0575669
Sbay_11.250	3307.61	-0.0485871	0.118021	-0.411681	0.680574	0.793274
Sbay_11.251	379.456	0.340059	0.151389	2.24626	0.0246876	0.0639337
Sbay_11.252	301.806	0.316603	0.151104	2.09526	0.0361477	0.0873585
Sbay_11.253	465.277	-0.205589	0.166216	-1.23688	0.216132	0.351936
Sbay_11.254	565.571	0.442819	0.13388	3.30758	0.000941069	0.00418175
Sbay_11.255	474.276	0.23332	0.147635	1.58039	0.114018	0.217437
Sbay_11.256	382.411	-0.126717	0.29629	-0.427677	0.668886	0.78415
Sbay_11.257	473.27	0.205861	0.211564	0.973044	0.330531	0.482192
Sbay_11.258	1017.02	0.0382943	0.156451	0.244769	0.806635	0.881383
Sbay_11.259	0.235396	-0.985169	4.00567	-0.245944	0.805726	NA
Sbay_11.260	452.389	-0.324382	0.191224	-1.69635	0.0898205	0.180303
Sbay_11.261	1730.96	-0.821745	0.12975	-6.33331	2.3996e-10	4.4363e-09
Sbay_11.262	1216.81	-0.305471	0.172837	-1.76739	0.0771623	0.161102
Sbay_11.263	505.415	-0.476531	0.196495	-2.42515	0.015302	0.043093
Sbay_11.264	793.439	-0.406354	0.13415	-3.02911	0.00245278	0.00936841
Sbay_11.265	3.32837	-1.54939	1.16207	-1.3333	0.182432	0.310005
Sbay_11.266	3.62468	-0.190163	1.02377	-0.185748	0.852642	0.90991
Sbay_11.267	1053.19	-0.161061	0.118594	-1.35809	0.174435	0.300163
Sbay_11.268	299.277	0.677517	0.193628	3.49907	0.00046689	0.00230179
Sbay_11.269	209.583	0.355259	0.233297	1.52278	0.127815	0.236884
Sbay_11.270	631.561	0.991091	0.211672	4.68219	2.83825e-06	2.50754e-05
Sbay_11.271	0.496122	-0.302998	3.25083	-0.0932065	0.92574	0.957551
Sbay_11.272	13.3604	-0.914839	0.643725	-1.42116	0.155269	0.274273
Sbay_11.273	492.406	-0.398839	0.260164	-1.53303	0.125269	0.234046
Sbay_11.274	0.21151	1.73959	4.08047	0.426321	0.669874	NA
Sbay_11.275	68.2245	0.754279	0.447888	1.68408	0.0921668	0.184088
Sbay_11.277	3688	-0.421992	0.163218	-2.58546	0.009725	0.0297208
Sbay_11.278	1862.65	0.159154	0.176287	0.902815	0.366624	0.517751
Sbay_11.279	167.984	0.300301	0.219768	1.36645	0.171799	0.29675
Sbay_11.280	141.48	0.864891	0.203341	4.2534	2.10549e-05	0.000152502
Sbay_11.281	4071.29	0.00417081	0.209648	0.0198943	0.984128	0.992078
Sbay_11.282	3389.81	0.53789	0.142649	3.77071	0.000162782	0.000926865
Sbay_11.283	725.181	0.318864	0.194596	1.63859	0.101298	0.197969
Sbay_11.284	1332.48	0.0953329	0.182857	0.521351	0.602122	0.734003
Sbay_11.285	308.751	0.250549	0.164792	1.52039	0.128413	0.237542
Sbay_11.286	321.414	0.334356	0.244763	1.36604	0.171926	0.296869
Sbay_11.287	151.833	0.910417	0.471378	1.93139	0.0534343	0.11903
Sbay_11.288	524.405	0.34793	0.154804	2.24754	0.0246053	0.0637689
Sbay_11.289	184.084	0.176283	0.183899	0.958586	0.337767	0.490135
Sbay_11.290	599.519	0.212247	0.30311	0.700233	0.483782	0.630654
Sbay_11.291	9269.71	-0.451551	0.125653	-3.59365	0.000326083	0.00166659
Sbay_11.292	1341.44	-0.605378	0.191618	-3.15929	0.00158151	0.00652429
Sbay_11.293	455.392	-0.795036	0.181185	-4.38797	1.14415e-05	8.82042e-05
Sbay_11.294	6740.04	0.0117013	0.118482	0.0987606	0.921328	0.955264
Sbay_11.295	315.289	-0.503064	0.279608	-1.79918	0.0719908	0.152108
Sbay_11.296	755.394	-1.36931	0.243771	-5.61721	1.94065e-08	2.66006e-07
Sbay_11.297	1546.23	0.504369	0.149951	3.36356	0.000769429	0.00353171
Sbay_11.298	277.121	0.301201	0.233841	1.28806	0.197725	0.330093
Sbay_11.299	288.68	-0.0383445	0.196023	-0.195612	0.844914	0.904725
Sbay_11.300	1188.21	0.705555	0.11768	5.99552	2.02832e-09	3.29259e-08
Sbay_11.301	1717.16	0.57966	0.225008	2.57617	0.00999013	0.0303145
Sbay_11.302	4094.69	0.213626	0.162869	1.31164	0.18964	0.319265
Sbay_11.303	770.638	0.392772	0.127693	3.0759	0.0020987	0.00821649
Sbay_11.304	208.398	0.110257	0.185104	0.595652	0.551408	0.691694
Sbay_11.305	491.434	0.528837	0.153131	3.4535	0.000553353	0.00266232
Sbay_11.306	1234.4	-0.486681	0.125675	-3.87254	0.000107705	0.000647744
Sbay_11.307	1177.76	0.301571	0.124756	2.41728	0.0156368	0.0437888
Sbay_11.308	8.83662	-1.30127	0.717015	-1.81484	0.0695482	0.147938
Sbay_11.309	0.716657	-1.03236	2.3926	-0.431481	0.666118	0.781903
Sbay_11.310	681.115	-0.308957	0.175598	-1.75946	0.0784993	0.162943
Sbay_11.311	204.613	-0.655941	0.275092	-2.38444	0.017105	0.0471727
Sbay_11.312	693.555	1.12576	0.220087	5.11506	3.13636e-07	3.31336e-06
Sbay_11.313	103.612	-0.82268	0.329345	-2.49793	0.0124921	0.0364479
Sbay_11.314	273.43	0.671239	0.189254	3.54675	0.000390008	0.00197144
Sbay_11.315	498.201	-1.10317	0.164291	-6.71471	1.88436e-11	4.34127e-10
Sbay_11.316	2144.02	0.49801	0.759521	0.65569	0.512024	0.655767
Sbay_11.317	1062.42	0.234268	0.278294	0.841802	0.399899	0.550033
Sbay_11.318	846.174	-0.418911	0.151191	-2.77074	0.00559296	0.0188795
Sbay_11.319	124.088	0.245324	0.257425	0.952992	0.340594	0.492921
Sbay_11.320	1281.69	0.631795	0.124875	5.05942	4.20538e-07	4.35064e-06
Sbay_11.321	2235.31	1.06374	0.132042	8.05603	7.8811e-16	3.63137e-14
Sbay_11.322	350.519	-0.285603	0.158238	-1.80489	0.0710914	0.150686
Sbay_11.323	493.351	0.291256	0.146895	1.98275	0.047395	0.10774
Sbay_11.324	541.715	-0.12279	0.144453	-0.850035	0.395305	0.545558
Sbay_11.325	1607.71	-0.274531	0.146995	-1.86761	0.0618159	0.134207
Sbay_11.326	1137.1	0.2617	0.116214	2.25189	0.0243292	0.0633068
Sbay_11.327	347.447	-0.638164	0.220412	-2.89532	0.00378772	0.0137008
Sbay_11.328	2295.02	1.10124	0.245162	4.49188	7.05961e-06	5.63827e-05
Sbay_11.329	2683.83	0.309197	0.65108	0.474899	0.634859	0.758891
Sbay_11.330	22270.2	-0.444658	0.126562	-3.51337	0.000442463	0.00220129
Sbay_11.331	2101.57	-0.290414	0.110371	-2.63126	0.00850685	0.026595
Sbay_11.332	272.749	0.577268	0.175732	3.28494	0.00102003	0.00447291
Sbay_11.333	1060.18	-0.482551	0.155599	-3.10125	0.00192706	0.00766984
Sbay_11.334	18.9836	2.05422	0.52022	3.94876	7.85568e-05	0.000493033
Sbay_11.335	598.689	-0.0779949	0.184437	-0.422881	0.672382	0.786788
Sbay_11.336	206.572	-0.245793	0.387466	-0.634361	0.525845	0.667385
Sbay_11.338	1088.66	-0.513641	0.139905	-3.67136	0.000241259	0.00129023
Sbay_11.339	183.087	-0.0414305	0.226452	-0.182955	0.854833	0.911274
Sbay_11.340	239.058	-0.0986284	0.275547	-0.357936	0.720391	0.821792
Sbay_111.1	15.901	0.566252	0.471754	1.20031	0.230019	0.368991
Sbay_113.1	0.126235	-0.183963	4.08047	-0.0450838	0.964041	NA
Sbay_114.1	14.2833	-0.625816	0.658259	-0.950714	0.341749	0.493748
Sbay_12.1	1.77079	1.27585	1.67825	0.760227	0.447119	0.596092
Sbay_12.2	5.63829	-0.224908	0.95589	-0.235286	0.813987	0.886022
Sbay_12.3	450.734	-2.53388	0.901755	-2.80995	0.00495497	0.0171223
Sbay_12.4	85977.9	-0.583471	0.175483	-3.32495	0.000884345	0.00395611
Sbay_12.5	1610.14	-0.0953802	0.116866	-0.816153	0.414413	0.563802
Sbay_12.6	2382.42	0.303625	0.143735	2.1124	0.0346522	0.0845486
Sbay_12.7	2934.43	0.112874	0.139483	0.80923	0.418383	0.567636
Sbay_12.8	746.799	-0.716932	0.211162	-3.39518	0.000685844	0.00319456
Sbay_12.9	372.659	-0.201365	0.159197	-1.26488	0.205914	0.339702
Sbay_12.10	1025.89	0.121952	0.16529	0.737807	0.460632	0.608602
Sbay_12.11	158.807	0.692994	0.195778	3.5397	0.00040059	0.00201641
Sbay_12.12	689.56	0.202227	0.184867	1.0939	0.273998	0.422457
Sbay_12.13	5101.47	0.555729	0.20692	2.68571	0.00723752	0.023233
Sbay_12.14	394.741	0.122639	0.133978	0.915371	0.359997	0.511112
Sbay_12.15	266.381	-0.390904	0.164075	-2.38247	0.0171968	0.0473605
Sbay_12.16	765.297	-0.0664481	0.172386	-0.385461	0.699896	0.807002
Sbay_12.17	2151.36	-0.767043	0.143683	-5.33843	9.37553e-08	1.12095e-06
Sbay_12.18	811.419	-0.0772165	0.195172	-0.395633	0.692376	0.801436
Sbay_12.19	200.487	0.453104	0.180881	2.50498	0.0122457	0.035904
Sbay_12.20	2266.2	0.300883	0.110275	2.72848	0.00636265	0.0209639
Sbay_12.21	129.486	1.14009	0.22009	5.1801	2.21761e-07	2.44632e-06
Sbay_12.22	0	NA	NA	NA	NA	NA
Sbay_12.23	0	NA	NA	NA	NA	NA
Sbay_12.24	0	NA	NA	NA	NA	NA
Sbay_12.25	12.2621	-0.448388	0.531555	-0.84354	0.398926	0.548848
Sbay_12.26	0	NA	NA	NA	NA	NA
Sbay_12.27	0.675491	0.751852	2.96223	0.253813	0.79964	0.87589
Sbay_12.28	29.6357	1.28897	0.417419	3.08796	0.00201535	0.00795777
Sbay_12.29	1166.07	0.680774	0.210772	3.2299	0.00123833	0.00526446
Sbay_12.30	2.51971	0.666016	1.32755	0.501688	0.615887	0.743033
Sbay_12.31	1.0048	0.808581	1.94982	0.414694	0.678366	0.791439
Sbay_12.32	204.523	0.828596	0.282876	2.92918	0.00339855	0.0124358
Sbay_12.35	2253.59	0.420264	0.272484	1.54234	0.122991	0.231017
Sbay_12.36	1621.1	-0.125303	0.131912	-0.9499	0.342163	0.494093
Sbay_12.37	1344.28	-0.398412	0.131419	-3.03161	0.00243255	0.00931051
Sbay_12.38	0.126235	-0.183963	4.08047	-0.0450838	0.964041	NA
Sbay_12.39	0	NA	NA	NA	NA	NA
Sbay_12.40	1.85942	-0.336959	1.49991	-0.224653	0.822249	0.891286
Sbay_12.41	22.487	0.252238	0.439174	0.574347	0.565733	0.703219
Sbay_12.42	461.883	-0.124852	0.152045	-0.821152	0.41156	0.561815
Sbay_12.43	12.5541	0.493476	0.621127	0.794485	0.426913	0.576727
Sbay_12.44	0.337745	0.777824	3.5947	0.216381	0.828691	0.893745
Sbay_12.45	1363.35	0.153483	0.135495	1.13275	0.257317	0.402121
Sbay_12.46	597.065	-0.889977	0.167425	-5.31568	1.0626e-07	1.25295e-06
Sbay_12.47	25184.1	-1.42789	0.375076	-3.80692	0.000140708	0.000817853
Sbay_12.48	407.565	-0.000887448	0.327905	-0.00270642	0.997841	0.998674
Sbay_12.49	461.769	0.112701	0.177385	0.635348	0.525202	0.666799
Sbay_12.50	383.924	0.28045	0.148206	1.89229	0.0584518	0.128157
Sbay_12.51	753.314	-1.00185	0.134978	-7.42237	1.15045e-13	3.73335e-12
Sbay_12.52	0	NA	NA	NA	NA	NA
Sbay_12.54	0.344557	-1.53802	3.5009	-0.43932	0.660429	0.777969
Sbay_12.55	5900.51	1.40086	0.17512	7.99944	1.2499e-15	5.58722e-14
Sbay_12.56	92.6167	-0.945286	0.275151	-3.43552	0.000591422	0.00280714
Sbay_12.57	421.424	-0.353703	0.182032	-1.94308	0.0520069	0.116413
Sbay_12.58	0	NA	NA	NA	NA	NA
Sbay_12.59	578.953	-0.14365	0.131617	-1.09142	0.275087	0.423568
Sbay_12.60	3511.23	-0.0922913	0.146486	-0.630034	0.528672	0.670353
Sbay_12.61	93.1297	0.640156	0.324855	1.97059	0.048771	0.110282
Sbay_12.62	1494	0.204472	0.201225	1.01613	0.309565	0.460123
Sbay_12.63	2782.35	0.198429	0.128258	1.54711	0.121836	0.229569
Sbay_12.64	344.273	0.211425	0.170902	1.23711	0.216046	0.351936
Sbay_12.65	2315.04	0.0808742	0.29014	0.278742	0.780443	0.862438
Sbay_12.66	184.503	-0.0588131	0.309653	-0.189932	0.849362	0.907704
Sbay_12.67	0	NA	NA	NA	NA	NA
Sbay_12.68	0.558898	1.61525	2.62848	0.61452	0.538872	0.680549
Sbay_12.69	494.36	-0.229424	0.261498	-0.877346	0.380299	0.532177
Sbay_12.70	0	NA	NA	NA	NA	NA
Sbay_12.71	2846.72	0.221284	0.131968	1.6768	0.0935823	0.186108
Sbay_12.72	59.7104	-0.430337	0.269601	-1.5962	0.110444	0.211835
Sbay_12.73	0.487867	-2.02857	3.1553	-0.642909	0.520283	0.661918
Sbay_12.74	222.029	-0.090168	0.181765	-0.496069	0.619846	0.746307
Sbay_12.75	0.109161	-0.183963	4.08047	-0.0450838	0.964041	NA
Sbay_12.76	2646.69	-0.778269	0.139543	-5.57727	2.44317e-08	3.30352e-07
Sbay_12.77	519.825	-0.688226	0.194127	-3.54524	0.000392259	0.00198114
Sbay_12.78	643.379	0.481747	0.135387	3.55829	0.000373275	0.00189324
Sbay_12.79	2988.31	0.205843	0.16154	1.27425	0.202574	0.335291
Sbay_12.80	2699.98	0.464213	0.169591	2.73725	0.00619549	0.0205487
Sbay_12.81	0.126235	-0.183963	4.08047	-0.0450838	0.964041	NA
Sbay_12.83	1789.75	-0.196539	0.13547	-1.45079	0.146837	0.262667
Sbay_12.84	850.181	-0.0675162	0.221471	-0.304853	0.760478	0.850158
Sbay_12.85	453.823	-0.0624337	0.199396	-0.313113	0.754195	0.84582
Sbay_12.87	204.984	-0.537147	0.193011	-2.78299	0.005386	0.0182892
Sbay_12.88	1015.04	-0.0909318	0.121067	-0.751088	0.4526	0.601258
Sbay_12.89	114.968	0.665447	0.215572	3.08689	0.00202261	0.0079787
Sbay_12.90	284.616	0.422156	0.160587	2.62883	0.00856802	0.0267026
Sbay_12.91	2345.45	-0.403417	0.147339	-2.73802	0.00618104	0.0205122
Sbay_12.92	634.229	0.0538459	0.140263	0.383894	0.701057	0.807875
Sbay_12.93	32026	0.417517	0.30221	1.38155	0.167111	0.29048
Sbay_12.94	429.994	-2.67939	0.42636	-6.28433	3.29272e-10	5.94078e-09
Sbay_12.95	512.325	-0.153088	0.204758	-0.747653	0.45467	0.602957
Sbay_12.96	112.926	0.0233711	0.204056	0.114533	0.908815	0.947407
Sbay_12.97	190.311	0.554369	0.226797	2.44434	0.0145118	0.0410997
Sbay_12.98	432.186	0.181377	0.166199	1.09132	0.27513	0.423568
Sbay_12.99	2297.72	0.350889	0.120858	2.90331	0.0036924	0.0134127
Sbay_12.100	50.9846	1.69982	0.367603	4.62406	3.76299e-06	3.21545e-05
Sbay_12.101	0	NA	NA	NA	NA	NA
Sbay_12.102	186.945	0.112156	0.268918	0.417065	0.676631	0.790216
Sbay_12.103	495.029	-0.0484258	0.235858	-0.205318	0.837324	0.899331
Sbay_12.104	3382.43	-0.674377	0.164535	-4.09867	4.15524e-05	0.000282198
Sbay_12.105	532.021	0.142806	0.155308	0.919504	0.357832	0.50852
Sbay_12.106	295.37	1.11236	0.277245	4.01219	6.0157e-05	0.000392101
Sbay_12.107	74.984	0.350139	0.258249	1.35582	0.175157	0.301145
Sbay_12.108	105.283	0.000142372	0.254275	0.000559912	0.999553	0.99972
Sbay_12.109	94.8836	0.49659	0.21647	2.29404	0.0217883	0.0579795
Sbay_12.110	349.028	0.647955	0.170622	3.79761	0.000146101	0.000846367
Sbay_12.111	573.773	0.539132	0.167308	3.2224	0.00127121	0.00537749
Sbay_12.112	268.349	-0.809773	0.278619	-2.90638	0.00365639	0.0132899
Sbay_12.113	427.27	-0.394638	0.149592	-2.63809	0.00833742	0.0261749
Sbay_12.114	566.294	0.30481	0.159911	1.90612	0.0566341	0.12472
Sbay_12.116	1063.4	0.107764	0.136805	0.787721	0.43086	0.58088
Sbay_12.117	995.463	1.38061	0.148684	9.28554	1.60883e-20	1.81828e-18
Sbay_12.118	736.026	0.244398	0.127505	1.91678	0.0552662	0.122233
Sbay_12.119	240.645	-0.284646	0.213671	-1.33217	0.182805	0.310469
Sbay_12.121	252.718	-0.376514	0.184059	-2.04562	0.040794	0.0959011
Sbay_12.122	705.921	-0.378759	0.150135	-2.52279	0.0116428	0.0344551
Sbay_12.123	353.647	-0.8371	0.235472	-3.55498	0.000378005	0.00191561
Sbay_12.124	925.532	-0.376027	0.136036	-2.76417	0.00570685	0.0192153
Sbay_12.125	138.902	-0.058197	0.252627	-0.230368	0.817806	0.888701
Sbay_12.126	0.245865	1.73959	4.08047	0.426321	0.669874	NA
Sbay_12.127	1030.5	0.213287	0.119942	1.77824	0.075364	0.157843
Sbay_12.128	38631.3	-0.267435	0.152138	-1.75784	0.0787747	0.16333
Sbay_12.129	667.422	0.497927	0.306206	1.62612	0.103925	0.202047
Sbay_12.130	1.73833	-0.0447286	1.82148	-0.0245561	0.980409	0.989739
Sbay_12.131	7.83381	0.448285	0.911697	0.491704	0.622928	0.748745
Sbay_12.132	7123.24	-0.52059	0.261762	-1.98879	0.0467245	0.106699
Sbay_12.133	1240.8	0.171538	0.161925	1.05937	0.289433	0.438247
Sbay_12.134	300.418	0.0887138	0.218444	0.406116	0.684657	0.796246
Sbay_12.135	438.245	0.160046	0.189185	0.845976	0.397566	0.547957
Sbay_12.136	0.27497	-1.17782	3.82529	-0.307904	0.758155	NA
Sbay_12.137	731.907	0.176913	0.161422	1.09597	0.273092	0.421703
Sbay_12.138	135.11	0.279369	0.296561	0.942028	0.346178	0.496436
Sbay_12.139	322.099	-0.995099	0.204283	-4.87116	1.10942e-06	1.05819e-05
Sbay_12.140	0	NA	NA	NA	NA	NA
Sbay_12.141	40.4746	-0.136284	0.369204	-0.369128	0.712032	0.815813
Sbay_12.142	8.32863	1.17484	0.858821	1.36797	0.171321	0.296166
Sbay_12.143	0.498335	-0.112378	3.21687	-0.0349341	0.972132	0.985434
Sbay_12.144	365.47	-0.173913	0.154866	-1.12299	0.261442	0.407265
Sbay_12.145	0.109161	-0.183963	4.08047	-0.0450838	0.964041	NA
Sbay_12.146	384.167	-0.0841117	0.18271	-0.460356	0.64526	0.765823
Sbay_12.147	633.62	-0.128189	0.143927	-0.890653	0.373115	0.524192
Sbay_12.148	6106.74	-0.344568	0.164464	-2.0951	0.0361624	0.0873585
Sbay_12.149	556.802	-0.34	0.151183	-2.24892	0.0245174	0.0636304
Sbay_12.150	214.921	0.40114	0.216666	1.85143	0.0641083	0.138133
Sbay_12.151	269.634	0.233278	0.197246	1.18267	0.236938	0.378469
Sbay_12.152	438.495	0.393562	0.265938	1.4799	0.1389	0.252343
Sbay_12.153	3526.38	0.16851	0.145188	1.16063	0.245794	0.389293
Sbay_12.154	5409.89	-0.0247696	0.112702	-0.219779	0.826043	0.892518
Sbay_12.155	1161.14	-0.463487	0.172778	-2.68255	0.00730631	0.0234413
Sbay_12.156	0	NA	NA	NA	NA	NA
Sbay_12.157	121.711	0.21599	0.242549	0.890501	0.373197	0.524192
Sbay_12.158	532.293	-0.150004	0.13563	-1.10598	0.268735	0.416165
Sbay_12.159	494.251	0.487415	0.201503	2.4189	0.0155676	0.0436424
Sbay_12.160	1451.35	0.490552	0.305492	1.60578	0.108323	0.208635
Sbay_12.161	0.629995	-0.707165	2.24019	-0.315671	0.752252	0.844892
Sbay_12.162	1068.04	0.451924	0.177356	2.54812	0.0108305	0.0325186
Sbay_12.163	2158.92	1.88268	0.174544	10.7863	3.99623e-27	1.32985e-24
Sbay_12.164	462.344	0.985753	0.158676	6.21236	5.21932e-10	9.24963e-09
Sbay_12.165	1283.75	0.29525	0.128311	2.30106	0.0213884	0.0570167
Sbay_12.166	965.615	-0.153737	0.130493	-1.17812	0.238747	0.380953
Sbay_12.167	6335.89	-1.12955	0.11453	-9.86243	6.05628e-23	1.03649e-20
Sbay_12.168	104.492	-0.980307	0.437976	-2.23826	0.0252038	0.0651299
Sbay_12.169	1664.32	0.0392141	0.131718	0.297713	0.765922	0.853558
Sbay_12.170	329.808	-0.677281	0.223616	-3.02877	0.00245549	0.00936841
Sbay_12.171	468.736	-0.488806	0.170159	-2.87265	0.00407051	0.0145827
Sbay_12.172	419.223	-0.0247729	0.158238	-0.156555	0.875596	0.924718
Sbay_12.173	1390.11	-0.157012	0.17432	-0.900712	0.367742	0.518878
Sbay_12.174	26.975	1.06557	0.437124	2.43769	0.0147815	0.0418042
Sbay_12.175	1155.01	0.233752	0.107685	2.1707	0.0299541	0.0750734
Sbay_12.176	501.068	-0.0755359	0.139604	-0.541073	0.588457	0.722307
Sbay_12.177	1044.85	-0.456818	0.141112	-3.23727	0.00120679	0.00516334
Sbay_12.178	2233.89	-0.490289	0.130633	-3.75318	0.000174607	0.000985763
Sbay_12.179	894.163	0.457003	0.259865	1.75862	0.0786422	0.163112
Sbay_12.180	1065.38	0.127623	0.12139	1.05134	0.293102	0.442348
Sbay_12.181	296.354	-1.71077	0.222655	-7.68348	1.54824e-14	5.8696e-13
Sbay_12.182	8449.81	-0.532591	0.145075	-3.67115	0.00024146	0.00129023
Sbay_12.183	4.2209	1.32576	1.02716	1.2907	0.196809	0.328954
Sbay_12.184	1272.21	0.39816	0.234988	1.69438	0.0901923	0.180807
Sbay_12.185	69.9277	0.370781	0.2519	1.47194	0.141038	0.255001
Sbay_12.186	154.457	0.141314	0.207598	0.680712	0.496053	0.641274
Sbay_12.187	334.23	-0.357552	0.238023	-1.50217	0.133052	0.243849
Sbay_12.188	647.942	0.634995	0.155871	4.07385	4.62416e-05	0.000310524
Sbay_12.189	0.198654	1.73959	4.08047	0.426321	0.669874	NA
Sbay_12.190	2731.37	1.20145	0.130168	9.22998	2.70686e-20	2.90577e-18
Sbay_12.191	336.712	0.308258	0.228018	1.3519	0.176407	0.302426
Sbay_12.192	1725.48	0.172087	0.126138	1.36427	0.172481	0.29757
Sbay_12.193	10279.8	0.842186	0.242344	3.47517	0.000510522	0.00249635
Sbay_12.194	2990.91	0.389645	0.14365	2.71245	0.00667869	0.0217894
Sbay_12.195	659.384	0.0429217	0.136033	0.315525	0.752363	0.844892
Sbay_12.196	27.1371	0.490597	0.376052	1.3046	0.19203	0.322382
Sbay_12.197	1.40872	-0.979944	1.74412	-0.561856	0.574214	0.71109
Sbay_12.198	0	NA	NA	NA	NA	NA
Sbay_12.199	39.7805	0.0183461	0.334414	0.0548606	0.956249	0.975632
Sbay_12.200	1678.58	-1.7601	0.339727	-5.18092	2.20793e-07	2.44013e-06
Sbay_12.201	413.429	-0.425152	0.152734	-2.78361	0.00537575	0.0182647
Sbay_12.202	361.188	-0.718883	0.269307	-2.66938	0.0075991	0.0241991
Sbay_12.203	59.9164	0.295988	0.352638	0.839351	0.401272	0.551163
Sbay_12.204	94.981	0.753285	0.229798	3.27803	0.00104534	0.004562
Sbay_12.205	1881.52	0.926599	0.145529	6.36709	1.9265e-10	3.62885e-09
Sbay_12.206	559.275	-0.888075	0.347795	-2.55344	0.0106664	0.0321065
Sbay_12.207	82.5745	0.161474	0.310153	0.520626	0.602627	0.734003
Sbay_12.208	1132.33	-0.108567	0.130258	-0.833476	0.404576	0.554557
Sbay_12.209	377.612	0.0859241	0.149609	0.574325	0.565748	0.703219
Sbay_12.210	355.477	-0.118415	0.153854	-0.76966	0.441501	0.590707
Sbay_12.211	440.231	-1.73954	0.194233	-8.95591	3.36941e-19	2.84264e-17
Sbay_12.212	21500	-1.36697	0.154638	-8.83983	9.58633e-19	7.17776e-17
Sbay_12.213	531.411	-0.420139	0.164498	-2.55407	0.0106472	0.0320648
Sbay_12.214	46135.4	0.0386053	0.128884	0.299536	0.764531	0.852325
Sbay_12.215	484.886	-0.144761	0.192346	-0.752609	0.451685	0.600576
Sbay_12.216	1465.04	0.0948003	0.1321	0.717639	0.47298	0.62076
Sbay_12.217	1415.2	-0.133711	0.206286	-0.648181	0.516868	0.660508
Sbay_12.218	495.187	-0.369353	0.208791	-1.76901	0.076892	0.160706
Sbay_12.219	0.257895	-1.09557	3.89732	-0.281108	0.778627	NA
Sbay_12.220	184.3	0.13389	0.17949	0.745947	0.4557	0.603886
Sbay_12.221	968.938	-0.175579	0.153877	-1.14103	0.253856	0.398108
Sbay_12.222	551.885	0.212126	0.175283	1.21019	0.226205	0.36414
Sbay_12.223	677.521	-0.524888	0.192915	-2.72082	0.00651199	0.0213269
Sbay_12.224	188.63	0.462568	0.205392	2.25213	0.0243143	0.0632953
Sbay_12.225	605.706	0.282766	0.135603	2.08524	0.0370471	0.0889705
Sbay_12.226	312.038	0.127812	0.145957	0.875683	0.381202	0.533007
Sbay_12.227	519.343	1.01347	0.251238	4.03391	5.48572e-05	0.000361048
Sbay_12.228	417.658	0.345009	0.168492	2.04763	0.0405968	0.0955499
Sbay_12.229	1694.79	-1.57597	0.295137	-5.33978	9.30572e-08	1.11706e-06
Sbay_12.230	331.198	-0.63551	0.169614	-3.74681	0.000179101	0.00100545
Sbay_12.232	3388.29	0.278584	0.129059	2.15858	0.0308828	0.0768861
Sbay_12.233	451.656	0.294675	0.153022	1.9257	0.0541422	0.120301
Sbay_12.234	248.047	-0.177369	0.159913	-1.10916	0.267363	0.414612
Sbay_12.235	562.451	0.636679	0.161902	3.93249	8.40694e-05	0.000523468
Sbay_12.236	2574.4	0.18149	0.150268	1.20777	0.227135	0.365441
Sbay_12.237	746.883	-0.239512	0.157377	-1.52189	0.128036	0.23718
Sbay_12.238	10299.3	0.0550592	0.136357	0.403786	0.68637	0.797238
Sbay_12.240	6.46668	0.315334	0.885602	0.356068	0.72179	0.822744
Sbay_12.241	123.004	0.36341	0.277737	1.30847	0.190714	0.320532
Sbay_12.242	1026.28	1.59695	0.229623	6.95464	3.53452e-12	9.00926e-11
Sbay_12.243	9.12635	1.17149	0.629431	1.86118	0.0627186	0.135724
Sbay_12.244	9.27336	-0.880191	0.620107	-1.41942	0.155777	0.274685
Sbay_12.245	2.67835	-0.0972304	1.12724	-0.0862555	0.931263	0.960541
Sbay_12.246	143.171	1.46108	0.203343	7.18531	6.70564e-13	1.94984e-11
Sbay_12.247	107.13	-0.118197	0.225245	-0.524752	0.599756	0.732554
Sbay_12.248	0	NA	NA	NA	NA	NA
Sbay_12.249	209.521	0.0443626	0.173181	0.256162	0.797825	0.87527
Sbay_12.250	100.592	0.790721	0.25678	3.07937	0.00207436	0.0081457
Sbay_12.251	0	NA	NA	NA	NA	NA
Sbay_12.252	61.2767	-0.313863	0.278327	-1.12768	0.259456	0.404829
Sbay_12.253	814.592	0.498499	0.217877	2.28798	0.0221384	0.0587546
Sbay_12.254	0.218322	-0.892363	4.05642	-0.219988	0.82588	NA
Sbay_12.255	1.42812	0.549687	2.13152	0.257885	0.796496	0.875057
Sbay_12.256	147.87	-0.325145	0.198157	-1.64085	0.100829	0.197182
Sbay_12.257	0.880956	-0.192137	2.01064	-0.0955602	0.92387	0.956609
Sbay_12.258	328.107	0.858883	0.171463	5.00914	5.46739e-07	5.48571e-06
Sbay_12.259	170.1	-0.827878	1.07651	-0.769037	0.441872	0.59107
Sbay_12.260	11.5796	1.23645	0.571185	2.16471	0.0304102	0.0758988
Sbay_12.261	4.59948	-0.71415	1.47359	-0.484634	0.627936	0.753171
Sbay_12.262	0	NA	NA	NA	NA	NA
Sbay_12.263	312.207	-2.39921	0.774588	-3.0974	0.00195227	0.00775471
Sbay_12.264	4.38121	-3.16997	1.26607	-2.50378	0.0122875	0.036009
Sbay_12.265	649.277	-2.713	0.980089	-2.76812	0.00563814	0.0190053
Sbay_12.266	191.262	-0.620924	0.182649	-3.39955	0.00067498	0.00314641
Sbay_12.267	1.40462	0.692852	1.5922	0.435154	0.663451	0.78041
Sbay_12.268	0.570754	1.69088	2.62447	0.644274	0.519398	0.661918
Sbay_12.269	0	NA	NA	NA	NA	NA
Sbay_12.270	0	NA	NA	NA	NA	NA
Sbay_12.271	0	NA	NA	NA	NA	NA
Sbay_12.272	6.21833	-0.513663	0.788583	-0.651374	0.514805	0.658203
Sbay_12.273	8.16629	0.655781	0.632852	1.03623	0.300094	0.450405
Sbay_13.1	0	NA	NA	NA	NA	NA
Sbay_13.2	986.38	-0.593321	0.269476	-2.20176	0.0276826	0.0704113
Sbay_13.3	8.46228	-0.690124	0.79149	-0.87193	0.383247	0.534742
Sbay_13.4	44.2896	-0.112048	0.309191	-0.362392	0.717059	0.819223
Sbay_13.5	103.836	-0.466535	0.237663	-1.96301	0.0496446	0.111973
Sbay_13.6	575.38	-0.34287	0.138766	-2.47085	0.0134792	0.0388924
Sbay_13.7	2.08996	0.746015	1.26297	0.590685	0.554731	0.694574
Sbay_13.8	1.12308	-1.95208	1.92371	-1.01475	0.310227	0.460481
Sbay_13.9	6.94062	0.662201	0.734681	0.901345	0.367405	0.518679
Sbay_13.10	478.27	2.15579	0.196834	10.9523	6.47584e-28	2.42439e-25
Sbay_13.11	4690.48	-1.53561	0.335251	-4.58048	4.63905e-06	3.87018e-05
Sbay_13.12	353.439	0.542417	0.290245	1.86883	0.061647	0.133889
Sbay_13.13	1550.45	0.821613	0.137428	5.97849	2.25215e-09	3.60706e-08
Sbay_13.14	13748.9	-0.0191978	0.311952	-0.0615407	0.950929	0.972356
Sbay_13.15	1684.16	0.0317978	0.123747	0.256958	0.797212	0.875057
Sbay_13.17	4221.11	0.291035	0.272152	1.06938	0.284897	0.433241
Sbay_13.18	675.32	0.65564	0.193728	3.38433	0.000713525	0.00330806
Sbay_13.19	2409.03	0.550439	0.178686	3.08048	0.00206668	0.00812299
Sbay_13.20	435.432	0.42082	0.846839	0.496931	0.619238	0.745725
Sbay_13.21	5.88741	-1.01533	0.818586	-1.24035	0.214846	0.350758
Sbay_13.22	829.633	0.140863	0.170973	0.823895	0.409999	0.560067
Sbay_13.23	8232.43	-1.54472	0.247564	-6.23968	4.38475e-10	7.81687e-09
Sbay_13.24	279.603	0.0258195	0.230505	0.112013	0.910813	0.948006
Sbay_13.25	227.261	0.0089323	0.180717	0.049427	0.960579	0.978555
Sbay_13.26	1793.16	-0.782926	0.128969	-6.07067	1.27381e-09	2.12538e-08
Sbay_13.27	395.354	-0.568152	0.161985	-3.50743	0.000452453	0.0022454
Sbay_13.28	1780.97	-0.487764	0.143314	-3.40346	0.00066537	0.00310644
Sbay_13.29	542.327	-0.125146	0.180142	-0.694703	0.487241	0.633509
Sbay_13.30	0.986583	-3.04242	2.03855	-1.49245	0.135582	0.247678
Sbay_13.31	98.1866	0.0663809	0.35084	0.189206	0.849932	0.90815
Sbay_13.32	232.648	0.581047	0.197612	2.94035	0.00327846	0.0120552
Sbay_13.33	780.589	-0.795451	0.14756	-5.39069	7.0188e-08	8.72254e-07
Sbay_13.34	5731.17	1.05502	0.174996	6.02882	1.65164e-09	2.70309e-08
Sbay_13.35	173.689	0.186528	0.186355	1.00093	0.316862	0.467996
Sbay_13.36	53.1587	-0.56791	0.347756	-1.63307	0.102454	0.199512
Sbay_13.37	278.744	-0.192652	0.164089	-1.17408	0.240365	0.38282
Sbay_13.38	2300.89	-0.0751827	0.169336	-0.443986	0.657053	0.775669
Sbay_13.39	1595.61	0.0369437	0.138064	0.267585	0.789019	0.86943
Sbay_13.40	258.417	-0.271898	0.176437	-1.54105	0.123304	0.231461
Sbay_13.41	1031.21	-0.629516	0.147158	-4.27783	1.88727e-05	0.000138538
Sbay_13.42	22.2395	0.618388	0.402569	1.53611	0.124512	0.233295
Sbay_13.43	61.9242	0.451383	0.364506	1.23834	0.21559	0.351561
Sbay_13.44	0	NA	NA	NA	NA	NA
Sbay_13.45	166.024	-1.38979	0.25714	-5.40481	6.48788e-08	8.14726e-07
Sbay_13.46	629.507	-0.316674	0.161094	-1.96577	0.0493253	0.11141
Sbay_13.47	0	NA	NA	NA	NA	NA
Sbay_13.48	83.2645	1.87577	0.251497	7.45842	8.75638e-14	2.91393e-12
Sbay_13.49	459.963	-0.454811	0.184219	-2.46886	0.0135543	0.0390714
Sbay_13.50	364.94	-0.325849	0.187042	-1.74212	0.0814882	0.167449
Sbay_13.51	446.819	-0.494584	0.172912	-2.86032	0.00423208	0.0150804
Sbay_13.52	460.022	-0.312263	0.188713	-1.6547	0.0979857	0.193198
Sbay_13.53	144.925	0.204698	0.191207	1.07056	0.284369	0.432987
Sbay_13.54	592.249	0.38566	0.171743	2.24557	0.0247317	0.0640203
Sbay_13.55	1027.65	-0.383299	0.28095	-1.3643	0.172474	0.29757
Sbay_13.56	2761.8	0.263414	0.181951	1.44772	0.147695	0.263719
Sbay_13.58	38.845	-3.0675	0.477897	-6.41874	1.37411e-10	2.65455e-09
Sbay_13.59	1845.4	-2.40763	0.271804	-8.85798	8.14781e-19	6.31539e-17
Sbay_13.61	2.40595	-2.13139	1.46518	-1.45469	0.145754	0.261241
Sbay_13.62	5.48617	-0.91429	0.895019	-1.02153	0.307003	0.457267
Sbay_13.63	458.096	-0.370842	0.192432	-1.92714	0.0539626	0.120041
Sbay_13.64	365.135	-1.59838	0.29073	-5.49782	3.84517e-08	4.98541e-07
Sbay_13.65	3043.67	0.392161	0.133504	2.93744	0.00330934	0.0121613
Sbay_13.66	4210.57	0.223983	0.157359	1.42339	0.154622	0.273459
Sbay_13.67	13.5448	-0.176291	0.606851	-0.290501	0.771433	0.856036
Sbay_13.68	629.945	-0.496612	0.191424	-2.59431	0.00947811	0.0290701
Sbay_13.69	2907.06	-1.34676	0.163332	-8.24558	1.64361e-16	8.56104e-15
Sbay_13.70	232.468	-0.528998	0.208977	-2.53137	0.0113618	0.033792
Sbay_13.71	187.335	-1.30062	0.222441	-5.84703	5.00441e-09	7.55073e-08
Sbay_13.72	322.045	0.564896	0.285223	1.98054	0.0476426	0.108221
Sbay_13.73	703.486	0.438771	0.157579	2.78445	0.00536182	0.0182381
Sbay_13.74	4135.41	0.207401	0.102654	2.0204	0.0433421	0.100862
Sbay_13.75	271.349	-0.27365	0.234997	-1.16448	0.244228	0.387402
Sbay_13.76	186.657	-0.000134413	0.198078	-0.000678588	0.999459	0.99972
Sbay_13.77	2294.01	-0.0844991	0.170727	-0.494936	0.620645	0.746969
Sbay_13.78	8126.73	-0.0689814	0.180438	-0.3823	0.702239	0.808769
Sbay_13.79	579.902	0.490856	0.222964	2.20151	0.0277	0.0704257
Sbay_13.80	0	NA	NA	NA	NA	NA
Sbay_13.81	1.57128	-1.44343	1.846	-0.781921	0.434261	0.584338
Sbay_13.82	12554.2	-0.21189	0.14066	-1.5064	0.131965	0.242476
Sbay_13.83	7947.06	-0.303641	0.139926	-2.17	0.0300067	0.0751737
Sbay_13.84	616.357	-0.0673316	0.153351	-0.439069	0.660611	0.77803
Sbay_13.85	0.126235	-0.183963	4.08047	-0.0450838	0.964041	NA
Sbay_13.86	4978.68	0.432929	0.149448	2.89685	0.0037693	0.0136506
Sbay_13.87	1579.48	0.240532	0.126505	1.90137	0.0572541	0.125808
Sbay_13.88	542.969	0.168212	0.161798	1.03964	0.298507	0.449023
Sbay_13.89	1113.24	0.290187	0.109694	2.64543	0.00815881	0.0256947
Sbay_13.90	6.77745	-1.32909	0.8899	-1.49353	0.135298	0.247311
Sbay_13.92	437.651	0.120142	0.156457	0.767893	0.442551	0.591249
Sbay_13.93	245.768	-0.31717	0.167323	-1.89555	0.0580193	0.127349
Sbay_13.94	34533.1	0.0419537	0.15051	0.278743	0.780442	0.862438
Sbay_13.95	586.356	0.209566	0.14655	1.43	0.152717	0.270804
Sbay_13.96	265.558	0.0284081	0.190185	0.149371	0.881261	0.929194
Sbay_13.97	106.301	0.603463	0.258382	2.33555	0.0195148	0.0527497
Sbay_13.98	1096.52	-0.800552	0.155804	-5.1382	2.77384e-07	2.97766e-06
Sbay_13.99	16.8309	2.05092	0.50752	4.04106	5.32101e-05	0.000351409
Sbay_13.100	1134.52	-0.79081	0.149567	-5.28735	1.24104e-07	1.42959e-06
Sbay_13.101	1417.6	-0.594979	0.160157	-3.71497	0.000203231	0.00112105
Sbay_13.102	367.846	-0.883165	0.26235	-3.36637	0.000761653	0.00350407
Sbay_13.103	6510.26	-0.427128	0.236954	-1.80258	0.0714549	0.151349
Sbay_13.104	1181.84	0.461476	0.152856	3.01903	0.00253586	0.00962166
Sbay_13.105	2327.22	-0.47009	0.355772	-1.32133	0.186393	0.315037
Sbay_13.106	2.98554	-0.432537	1.09334	-0.39561	0.692392	0.801436
Sbay_13.107	240.607	-0.702085	0.175192	-4.00751	6.13627e-05	0.000398658
Sbay_13.108	965.643	-1.25193	0.331247	-3.77944	0.000157181	0.000897535
Sbay_13.109	260.145	-0.14441	0.161576	-0.893761	0.37145	0.522725
Sbay_13.110	622.414	1.39921	0.195087	7.1722	7.38004e-13	2.10507e-11
Sbay_13.111	670.359	0.578401	0.13956	4.14447	3.40595e-05	0.000236678
Sbay_13.112	2218.03	-0.323408	0.172431	-1.87558	0.0607134	0.132293
Sbay_13.113	3.71856	-0.28452	1.22479	-0.232302	0.816304	0.887577
Sbay_13.114	211.369	-0.170673	0.224704	-0.759547	0.447525	0.596501
Sbay_13.116	0	NA	NA	NA	NA	NA
Sbay_13.117	151.743	0.635852	0.356949	1.78135	0.0748545	0.156995
Sbay_13.118	856.423	-1.00529	0.209036	-4.80916	1.51566e-06	1.40321e-05
Sbay_13.119	293.506	-0.359586	0.16466	-2.18381	0.0289765	0.0730203
Sbay_13.120	0	NA	NA	NA	NA	NA
Sbay_13.121	250.001	-0.156742	0.178213	-0.879519	0.37912	0.531211
Sbay_13.122	93.5626	0.337278	0.241539	1.39637	0.162603	0.283963
Sbay_13.123	129.147	-0.504959	0.270513	-1.86667	0.0619478	0.134445
Sbay_13.124	1526.79	-0.0663143	0.175153	-0.378608	0.704979	0.810942
Sbay_13.125	1008.71	0.0968417	0.256528	0.377509	0.705795	0.811617
Sbay_13.126	332.409	-0.42217	0.239343	-1.76387	0.077754	0.161999
Sbay_13.127	691.674	-0.158988	0.12692	-1.25266	0.210328	0.345452
Sbay_13.128	705.954	-0.0342283	0.157833	-0.216864	0.828314	0.89366
Sbay_13.129	2765.45	0.349137	0.136901	2.55028	0.0107635	0.0323338
Sbay_13.130	777.166	0.00995158	0.161283	0.0617027	0.9508	0.972356
Sbay_13.131	23238.3	-0.0182452	0.231308	-0.0788785	0.937129	0.963527
Sbay_13.132	19.7636	0.598116	0.467053	1.28062	0.200329	0.332493
Sbay_13.133	20163.8	-0.124575	0.134495	-0.926242	0.35432	0.505088
Sbay_13.134	1960	0.475977	0.155966	3.05179	0.00227479	0.00879662
Sbay_13.135	21529.8	-0.294322	0.111248	-2.64565	0.00815337	0.025691
Sbay_13.136	324.85	-0.655085	0.173259	-3.78095	0.00015623	0.000895434
Sbay_13.137	1328.15	0.444062	0.211518	2.0994	0.0357813	0.0867732
Sbay_13.138	395.706	0.559169	0.182282	3.0676	0.00215785	0.00842054
Sbay_13.139	600.6	0.00278756	0.124656	0.0223621	0.982159	0.990593
Sbay_13.140	308.544	-0.314654	0.160886	-1.95576	0.0504934	0.113364
Sbay_13.141	309.187	-0.663028	0.176594	-3.75455	0.000173656	0.000982249
Sbay_13.142	1432.29	-0.186607	0.118423	-1.57577	0.115079	0.218972
Sbay_13.143	1140.67	-0.990037	0.140871	-7.02798	2.09539e-12	5.55372e-11
Sbay_13.145	258.55	0.391516	0.196222	1.99527	0.0460137	0.105481
Sbay_13.146	247.789	0.995748	0.193229	5.15322	2.56055e-07	2.78361e-06
Sbay_13.147	1407.07	0.330385	0.117028	2.82312	0.00475585	0.0165915
Sbay_13.149	1686.2	-0.00472133	0.135837	-0.0347572	0.972273	0.985434
Sbay_13.150	163.221	-0.275963	0.180485	-1.529	0.126263	0.235174
Sbay_13.151	2983.09	-0.0832365	0.121986	-0.682345	0.495021	0.640426
Sbay_13.152	1452.1	1.20983	0.139593	8.66683	4.44319e-18	2.99042e-16
Sbay_13.153	5526.26	0.104012	0.273039	0.380942	0.703247	0.809308
Sbay_13.154	20.118	-1.07392	0.438179	-2.45087	0.0142512	0.0404763
Sbay_13.155	3039.32	-0.0362781	0.142981	-0.253727	0.799706	0.87589
Sbay_13.156	1039.72	-0.571213	0.167585	-3.40851	0.000653194	0.00306361
Sbay_13.157	0	NA	NA	NA	NA	NA
Sbay_13.158	138.233	0.532114	0.325105	1.63675	0.101683	0.198658
Sbay_13.159	5107.6	-0.0567617	0.162057	-0.350259	0.726145	0.825822
Sbay_13.160	367.021	-0.874773	0.148839	-5.87731	4.16984e-09	6.38807e-08
Sbay_13.161	1569.27	0.369985	0.147882	2.5019	0.0123527	0.0361647
Sbay_13.162	0	NA	NA	NA	NA	NA
Sbay_13.163	380.065	0.166049	0.286376	0.57983	0.562029	0.700636
Sbay_13.164	8.82649	-1.61497	0.678591	-2.37989	0.0173178	0.047628
Sbay_13.165	4109.68	0.0193234	0.148504	0.13012	0.896471	0.940102
Sbay_13.166	144.726	-1.09287	0.333213	-3.27979	0.00103885	0.00454211
Sbay_13.167	1198.41	0.365056	0.127945	2.85323	0.00432772	0.0153846
Sbay_13.168	734.975	0.307041	0.12979	2.36568	0.017997	0.0493824
Sbay_13.169	134.009	0.103743	0.315506	0.328816	0.742295	0.836723
Sbay_13.170	23585.1	1.04801	0.200047	5.23882	1.61607e-07	1.82302e-06
Sbay_13.171	6.15859	0.792164	0.73845	1.07274	0.283389	0.431824
Sbay_13.172	5854.71	0.5471	0.222288	2.46122	0.0138466	0.0396089
Sbay_13.173	482.017	-1.1631	0.135949	-8.5554	1.17457e-17	7.34621e-16
Sbay_13.174	29354.9	0.0983506	0.386508	0.25446	0.799141	0.87589
Sbay_13.175	0	NA	NA	NA	NA	NA
Sbay_13.176	5670.55	-0.0741941	0.12794	-0.579914	0.561972	0.700636
Sbay_13.177	182.551	-0.965025	0.227823	-4.23585	2.2769e-05	0.000163337
Sbay_13.180	2.83693	-0.216824	1.13259	-0.19144	0.848181	0.907088
Sbay_13.181	408.728	-0.144683	0.282429	-0.512283	0.608453	0.73778
Sbay_13.182	1895.35	-1.11811	0.400321	-2.79304	0.0052216	0.0178576
Sbay_13.183	1988.47	-0.272801	0.3176	-0.858946	0.390371	0.541654
Sbay_13.184	93.7515	-0.0892099	0.253285	-0.352212	0.72468	0.825096
Sbay_13.185	29.8614	-0.13644	0.403996	-0.337726	0.73557	0.831646
Sbay_13.186	412.315	-0.241008	0.18121	-1.32999	0.183521	0.311326
Sbay_13.187	1758.29	1.22112	0.199495	6.12104	9.2965e-10	1.60017e-08
Sbay_13.188	400.198	-0.566935	0.171438	-3.30693	0.00094323	0.00418825
Sbay_13.189	778.418	-0.0765399	0.352654	-0.21704	0.828177	0.89366
Sbay_13.190	473.155	0.881273	0.167487	5.26176	1.42685e-07	1.61872e-06
Sbay_13.191	0	NA	NA	NA	NA	NA
Sbay_13.192	3909.43	1.27051	0.144051	8.81984	1.14628e-18	8.47683e-17
Sbay_13.193	134.985	0.0914417	0.195087	0.468724	0.639267	0.761577
Sbay_13.194	508.929	0.13677	0.167145	0.81827	0.413203	0.563288
Sbay_13.195	3149.22	-0.00633106	0.114758	-0.0551688	0.956004	0.975632
Sbay_13.196	315.096	0.0253139	0.16595	0.152539	0.878761	0.927212
Sbay_13.197	737.35	0.177825	0.135201	1.31527	0.18842	0.317835
Sbay_13.198	347.217	-0.434319	0.221069	-1.96463	0.049457	0.111665
Sbay_13.199	10682.8	-0.0822426	0.141176	-0.582555	0.560193	0.699375
Sbay_13.200	0.772001	0.369871	2.43302	0.152021	0.87917	0.927316
Sbay_13.201	383.211	0.159201	0.241105	0.660299	0.509062	0.653231
Sbay_13.202	897.88	-0.0490134	0.122773	-0.399219	0.689732	0.79975
Sbay_13.203	103.827	0.0907329	0.334643	0.271134	0.786288	0.867014
Sbay_13.204	252.427	0.0882553	0.222374	0.396877	0.691458	0.801273
Sbay_13.205	307.606	-0.611519	0.168894	-3.62072	0.000293781	0.00153155
Sbay_13.206	1207.1	-0.9478	0.146661	-6.4625	1.02985e-10	2.03434e-09
Sbay_13.207	449.877	0.659865	0.159738	4.13091	3.61325e-05	0.000250502
Sbay_13.208	1128.78	0.484378	0.202308	2.39426	0.016654	0.0460561
Sbay_13.209	312.165	0.716348	0.207422	3.45358	0.000553203	0.00266232
Sbay_13.210	242.272	0.593577	0.184898	3.21029	0.00132601	0.00557391
Sbay_13.211	0.819212	0.501555	2.82189	0.177737	0.858929	0.914358
Sbay_13.212	185.613	-0.319172	0.187352	-1.70359	0.0884578	0.178225
Sbay_13.213	933.449	-0.287737	0.153261	-1.87743	0.0604595	0.131788
Sbay_13.214	432.812	-0.480695	0.153269	-3.13629	0.00171101	0.0069626
Sbay_13.215	0.148734	-0.183963	4.08047	-0.0450838	0.964041	NA
Sbay_13.216	1694.74	0.104196	0.143902	0.724074	0.46902	0.616644
Sbay_13.217	173.263	0.0404121	0.262838	0.153753	0.877805	0.926365
Sbay_13.218	1195.13	0.122051	0.309599	0.394221	0.693418	0.802313
Sbay_13.219	210.026	2.53288	0.305657	8.28668	1.16454e-16	6.28435e-15
Sbay_13.220	109.548	2.42943	0.350461	6.93212	4.14581e-12	1.05226e-10
Sbay_13.221	0.109161	-0.183963	4.08047	-0.0450838	0.964041	NA
Sbay_13.222	2123.1	0.822071	0.294028	2.79589	0.00517562	0.0177255
Sbay_13.223	52.8106	0.186679	0.472559	0.395039	0.692814	0.801769
Sbay_13.224	0	NA	NA	NA	NA	NA
Sbay_13.225	155.988	0.372463	0.202287	1.84126	0.0655828	0.140702
Sbay_13.226	468.531	0.347224	0.227769	1.52446	0.127394	0.236397
Sbay_13.227	1617.81	-0.24433	0.12021	-2.03253	0.0421	0.0984689
Sbay_13.228	198.381	0.91175	0.234436	3.88912	0.00010061	0.000613078
Sbay_13.229	111.932	-0.128098	0.289157	-0.443006	0.657761	0.7762
Sbay_13.230	2.13036	1.5132	1.40488	1.07711	0.281433	0.429937
Sbay_13.231	2973.05	1.97228	0.2693	7.32373	2.41173e-13	7.56349e-12
Sbay_13.232	242.223	0.607773	0.18908	3.21437	0.00130732	0.00550694
Sbay_13.233	749.44	0.096921	0.124083	0.781096	0.434746	0.584541
Sbay_13.234	961.041	-0.02409	0.135122	-0.178283	0.858501	0.914358
Sbay_13.236	733.156	-1.04225	0.343345	-3.03557	0.00240085	0.0092305
Sbay_13.237	71.9295	1.05776	0.330959	3.19605	0.00139323	0.00581971
Sbay_13.238	780.26	-0.503635	0.147132	-3.42301	0.000619308	0.00292099
Sbay_13.239	125.964	0.408566	0.202602	2.01659	0.0437379	0.101471
Sbay_13.241	285.867	0.349479	0.205354	1.70184	0.0887854	0.178704
Sbay_13.242	545.945	-0.0203101	0.202397	-0.100348	0.920068	0.954638
Sbay_13.243	195.103	-0.158743	0.224632	-0.706683	0.479764	0.62637
Sbay_13.244	17.2293	0.904355	0.6469	1.39798	0.162118	0.283282
Sbay_13.246	524.812	-0.921838	0.234431	-3.93223	8.41628e-05	0.000523505
Sbay_13.247	3.57851	-2.77815	1.42785	-1.94569	0.0516915	0.115794
Sbay_13.248	1088.71	0.0022477	0.134873	0.0166652	0.986704	0.99241
Sbay_13.249	1989.08	-0.227998	0.119226	-1.91231	0.0558363	0.123144
Sbay_13.250	225.99	0.696065	0.185529	3.75179	0.000175579	0.000989389
Sbay_13.251	511.653	0.216116	0.151802	1.42367	0.154542	0.273459
Sbay_13.252	386.559	-0.246568	0.149473	-1.64958	0.0990279	0.194996
Sbay_13.254	453.361	-0.4297	0.205574	-2.09024	0.0365961	0.0881212
Sbay_13.255	0.109161	-0.183963	4.08047	-0.0450838	0.964041	NA
Sbay_13.256	255.936	-0.141841	0.155748	-0.910709	0.362449	0.513741
Sbay_13.257	236.913	0.283888	0.187522	1.51389	0.130053	0.239853
Sbay_13.258	2252.1	-0.0964676	0.162557	-0.593437	0.552888	0.692846
Sbay_13.259	1920.38	-0.189821	0.171192	-1.10882	0.267508	0.414693
Sbay_13.260	3580.36	-0.110593	0.262903	-0.420661	0.674003	0.787915
Sbay_13.261	4825.16	0.802234	0.186114	4.31046	1.62918e-05	0.000121378
Sbay_13.262	882.568	2.27272	0.185017	12.2838	1.10618e-34	7.36222e-32
Sbay_13.263	2323.16	-0.0492618	0.201659	-0.244282	0.807012	0.881467
Sbay_13.264	219.33	0.398086	0.178019	2.23619	0.0253392	0.0654514
Sbay_13.265	853.367	0.141553	0.142966	0.990113	0.322119	0.473045
Sbay_13.266	3694.68	0.852589	0.139467	6.11318	9.76651e-10	1.66197e-08
Sbay_13.267	1014.52	-0.0932552	0.31461	-0.296415	0.766913	0.854168
Sbay_13.268	963.213	-0.14806	0.136772	-1.08253	0.279015	0.4281
Sbay_13.269	1647.49	-0.00653042	0.12718	-0.0513477	0.959048	0.977821
Sbay_13.270	836.807	-0.762329	0.209636	-3.63644	0.000276435	0.00145889
Sbay_13.271	44.7432	0.613041	0.297471	2.06084	0.0393181	0.093113
Sbay_13.272	1604.34	-1.33019	0.346022	-3.84422	0.000120937	0.000717951
Sbay_13.273	10060.2	-1.29432	0.742595	-1.74297	0.0813396	0.167373
Sbay_13.274	274.495	-0.256342	0.156124	-1.64191	0.100609	0.197008
Sbay_13.275	704.466	0.291019	0.127911	2.27517	0.0228958	0.0601459
Sbay_13.276	0.27497	-1.17782	3.82529	-0.307904	0.758155	NA
Sbay_13.277	3198.2	0.699582	0.120136	5.82325	5.77151e-09	8.6645e-08
Sbay_13.278	389.978	-0.443258	0.179033	-2.47585	0.0132921	0.0384078
Sbay_13.279	16.6444	0.522426	0.552917	0.944855	0.344733	0.49585
Sbay_13.280	4347.34	-0.246679	0.152385	-1.61878	0.105494	0.204435
Sbay_13.281	536.671	0.488014	0.231219	2.11062	0.0348054	0.0848532
Sbay_13.282	54782.1	0.366245	0.177214	2.06668	0.0387644	0.0921059
Sbay_13.283	110.506	0.899879	0.299716	3.00244	0.00267826	0.0100962
Sbay_13.284	0	NA	NA	NA	NA	NA
Sbay_13.285	0	NA	NA	NA	NA	NA
Sbay_13.286	19.2754	0.644882	0.554308	1.1634	0.244667	0.387814
Sbay_13.287	2619.52	-1.06489	0.317045	-3.35881	0.000782801	0.00356847
Sbay_13.288	2512.36	-0.138625	0.131478	-1.05436	0.291716	0.440924
Sbay_13.289	1985.59	-0.0196286	0.120121	-0.163407	0.870198	0.920934
Sbay_13.290	311.208	0.381724	0.178222	2.14185	0.0322058	0.0797821
Sbay_13.291	148.302	0.142248	0.220748	0.644388	0.519324	0.661918
Sbay_13.292	373.114	-0.461859	0.159978	-2.88702	0.00388912	0.0140083
Sbay_13.293	776.263	0.513501	0.173856	2.9536	0.00314087	0.011592
Sbay_13.294	801.649	-0.0924889	0.134189	-0.689246	0.490669	0.636583
Sbay_13.295	36571.5	0.0216442	0.147975	0.146269	0.883709	0.931507
Sbay_13.296	159.236	-0.304928	0.194543	-1.56741	0.11702	0.221889
Sbay_13.297	13.1627	2.35942	0.579656	4.07037	4.69377e-05	0.000314141
Sbay_13.298	1078.37	-0.264334	0.171112	-1.5448	0.122396	0.230183
Sbay_13.299	9098.57	0.56734	0.624495	0.908479	0.363625	0.514921
Sbay_13.300	5245.01	0.222111	0.125444	1.7706	0.076628	0.160322
Sbay_13.301	3557.99	-0.618309	0.191721	-3.22505	0.0012595	0.00533927
Sbay_13.302	730.275	0.228083	0.138954	1.64143	0.100709	0.197063
Sbay_13.303	2006.08	-0.361541	0.14709	-2.45796	0.0139729	0.0398561
Sbay_13.304	1737.02	-0.373357	0.118536	-3.14974	0.00163416	0.00670915
Sbay_13.305	103.597	-0.292851	0.232962	-1.25707	0.208727	0.343482
Sbay_13.306	207.227	0.306333	0.201157	1.52286	0.127794	0.236884
Sbay_13.307	1155.22	-0.235278	0.264731	-0.888746	0.37414	0.525093
Sbay_13.308	1061.66	-0.226389	0.118086	-1.91715	0.0552185	0.122186
Sbay_13.309	121.499	0.273986	0.202509	1.35295	0.17607	0.302022
Sbay_13.310	0	NA	NA	NA	NA	NA
Sbay_13.311	1303.24	0.733677	0.286549	2.56039	0.0104556	0.0315512
Sbay_13.312	87.3132	-0.363797	0.241408	-1.50698	0.131816	0.242276
Sbay_13.313	7.37836	0.174194	0.676058	0.257662	0.796668	0.875057
Sbay_13.314	590.577	-0.380824	0.300709	-1.26642	0.205363	0.33897
Sbay_13.315	2340.1	0.0423596	0.190561	0.222289	0.824089	0.891832
Sbay_13.316	978.586	-1.66192	0.313571	-5.29998	1.15815e-07	1.35495e-06
Sbay_13.317	199.988	0.244295	0.199571	1.2241	0.220914	0.357449
Sbay_13.318	83.0106	1.13459	0.227069	4.99666	5.8331e-07	5.82338e-06
Sbay_13.319	2000.27	-0.240794	0.155317	-1.55034	0.121059	0.22868
Sbay_13.320	1889.01	-0.366575	0.12785	-2.86723	0.00414081	0.0147816
Sbay_13.321	18359.8	0.193068	0.113927	1.69466	0.0901391	0.180761
Sbay_13.322	15695.5	0.149789	0.141187	1.06092	0.288726	0.437603
Sbay_13.323	75.1961	-0.5058	0.341548	-1.48091	0.138632	0.252001
Sbay_13.324	12073.2	-0.9263	0.186047	-4.97885	6.39625e-07	6.31087e-06
Sbay_13.325	4626.11	0.0597041	0.166098	0.359452	0.719257	0.820951
Sbay_13.326	103.358	-0.150296	0.326958	-0.45968	0.645746	0.766222
Sbay_13.327	198.863	-0.637922	0.193087	-3.3038	0.000953844	0.00422598
Sbay_13.328	1312.74	-0.23647	0.16271	-1.45332	0.146134	0.261765
Sbay_13.329	548.251	0.15239	0.167664	0.908906	0.3634	0.514723
Sbay_13.330	430.919	0.122921	0.148989	0.825032	0.409354	0.559568
Sbay_13.331	491.515	-0.250901	0.139262	-1.80164	0.0716016	0.151499
Sbay_13.332	264.133	-0.0737457	0.15108	-0.488123	0.625463	0.750656
Sbay_13.333	156.132	-0.613107	0.194555	-3.15133	0.00162526	0.00668148
Sbay_13.334	51.9717	0.393753	0.280683	1.40284	0.160664	0.281562
Sbay_13.335	1398.03	0.527319	0.142877	3.69073	0.000223613	0.00121304
Sbay_13.336	1985.86	0.932068	0.146728	6.35234	2.12063e-10	3.95718e-09
Sbay_13.337	0.487867	-2.02857	3.1553	-0.642909	0.520283	0.661918
Sbay_13.338	196.364	0.322438	0.217748	1.48079	0.138664	0.252001
Sbay_13.339	486.052	0.545277	0.142802	3.81842	0.000134309	0.000788738
Sbay_13.340	511.402	-0.341577	0.201689	-1.69358	0.0903446	0.180991
Sbay_13.341	1023.08	0.309045	0.205247	1.50572	0.132138	0.242719
Sbay_13.342	112.511	-0.612383	0.231138	-2.64942	0.00806291	0.0254462
Sbay_13.343	0	NA	NA	NA	NA	NA
Sbay_13.344	193.394	0.427425	0.170783	2.50274	0.0123237	0.0360972
Sbay_13.345	1193.47	0.52996	0.171913	3.08272	0.00205119	0.00806739
Sbay_13.346	789.009	1.17394	0.192451	6.09992	1.06121e-09	1.79567e-08
Sbay_13.347	392.093	0.15458	0.145146	1.06499	0.286879	0.435701
Sbay_13.348	112.712	-1.33809	0.340141	-3.93391	8.35738e-05	0.000520923
Sbay_13.349	2742.38	-0.980702	0.380125	-2.57994	0.00988164	0.0300846
Sbay_13.350	482.19	0.337218	0.147919	2.27975	0.0226226	0.059559
Sbay_13.352	1070.69	-0.256155	0.167405	-1.53015	0.12598	0.234865
Sbay_13.353	527.004	-0.00120502	0.166779	-0.00722524	0.994235	0.995898
Sbay_13.354	13122.2	1.45444	0.160708	9.05019	1.42723e-19	1.357e-17
Sbay_13.355	170.012	1.14845	0.275485	4.16882	3.06177e-05	0.000213504
Sbay_13.356	90.1152	0.686088	0.235499	2.91334	0.00357584	0.0130209
Sbay_13.357	422.1	-0.0514697	0.173408	-0.296813	0.766609	0.854006
Sbay_13.358	267.108	0.429541	0.246553	1.74218	0.0814762	0.167449
Sbay_13.359	880.845	-0.199914	0.142838	-1.39959	0.161637	0.282771
Sbay_13.360	120.876	-0.380512	0.286087	-1.33006	0.183499	0.311326
Sbay_13.361	143.995	-0.258852	0.221673	-1.16772	0.242921	0.385753
Sbay_13.362	916.116	-0.687976	0.212756	-3.23365	0.00122221	0.00521813
Sbay_13.363	130.98	-1.40699	0.384832	-3.65611	0.000256076	0.00135743
Sbay_13.364	1525.14	-0.0617253	0.123708	-0.498962	0.617806	0.744749
Sbay_13.365	276.359	-0.12974	0.170888	-0.759211	0.447727	0.596637
Sbay_13.366	279.21	0.0272029	0.219189	0.124107	0.90123	0.943481
Sbay_13.367	54298.5	-1.69297	0.366559	-4.61854	3.86456e-06	3.29754e-05
Sbay_13.368	213.269	0.192353	0.206673	0.930712	0.352002	0.502262
Sbay_13.369	2381.19	0.346455	0.138682	2.4982	0.0124827	0.0364383
Sbay_13.370	1416.62	0.75855	1.04736	0.724248	0.468914	0.616639
Sbay_13.371	431.877	-0.302844	0.180564	-1.67721	0.0935017	0.18601
Sbay_13.372	824.277	-0.355483	0.135304	-2.62729	0.00860685	0.026786
Sbay_13.373	685.233	0.0607846	0.161992	0.375232	0.707488	0.812771
Sbay_13.374	2576.33	0.862218	0.126735	6.80332	1.02236e-11	2.46933e-10
Sbay_13.375	5181.19	-0.144955	0.162988	-0.88936	0.37381	0.524753
Sbay_13.376	58.8513	-0.512007	0.292141	-1.7526	0.0796703	0.164447
Sbay_13.377	1447.66	0.538643	0.256126	2.10304	0.0354622	0.0862615
Sbay_13.378	5873.55	0.54372	0.206349	2.63495	0.00841497	0.0263628
Sbay_13.379	1014.03	-0.0668127	0.121096	-0.551734	0.58113	0.716987
Sbay_13.380	215.095	-0.0499338	0.210604	-0.237098	0.812581	0.884974
Sbay_13.381	206.79	1.59467	0.234631	6.7965	1.07191e-11	2.56831e-10
Sbay_13.382	1692.51	-0.475604	0.115393	-4.12162	3.76217e-05	0.000259051
Sbay_13.383	407.187	0.960793	0.150832	6.36997	1.89065e-10	3.57255e-09
Sbay_13.384	1669.57	0.137312	0.291979	0.470281	0.638154	0.761008
Sbay_13.385	5812.37	0.753269	0.140069	5.37783	7.53903e-08	9.27285e-07
Sbay_13.386	94.4999	0.00458068	0.243558	0.0188074	0.984995	0.992117
Sbay_13.387	14091.4	-0.612876	0.186015	-3.29478	0.000985003	0.00434076
Sbay_13.388	115.487	1.0636	0.414016	2.56898	0.0101998	0.0308726
Sbay_13.389	693.801	0.000593183	0.12492	0.00474849	0.996211	0.997377
Sbay_13.390	14.62	1.14222	0.519352	2.19931	0.0278557	0.0707614
Sbay_13.391	1458.02	0.446062	0.138908	3.2112	0.00132183	0.00556023
Sbay_13.392	666.924	-0.215368	0.146745	-1.46763	0.142204	0.256489
Sbay_13.393	1617.56	0.704284	0.204697	3.44061	0.000580398	0.00277239
Sbay_13.394	363.468	0.523023	0.152425	3.43135	0.000600594	0.00284617
Sbay_13.395	771.734	-0.52153	0.150294	-3.47006	0.000520335	0.00254018
Sbay_13.396	417.226	-0.210916	0.152491	-1.38314	0.166621	0.289797
Sbay_13.397	1041	0.611073	0.129419	4.72167	2.33915e-06	2.09753e-05
Sbay_13.398	657.499	-0.628892	0.170362	-3.69151	0.000222931	0.00121066
Sbay_13.399	1893.95	-0.849175	0.133268	-6.37193	1.86659e-10	3.53824e-09
Sbay_13.400	5618.38	0.124092	0.179007	0.693224	0.488169	0.634296
Sbay_13.401	539.228	-0.341073	0.128305	-2.65829	0.00785374	0.0249437
Sbay_13.402	1421.62	0.0650381	0.14795	0.439594	0.660231	0.777969
Sbay_13.403	1257.78	0.0349131	0.157704	0.221385	0.824793	0.892272
Sbay_13.404	303.4	-0.40123	0.181806	-2.20691	0.0273201	0.069578
Sbay_13.405	397.639	0.0998938	0.171296	0.583165	0.559782	0.699284
Sbay_13.407	316.825	-1.38714	0.16924	-8.19629	2.47919e-16	1.24793e-14
Sbay_13.408	455.478	-0.0204085	0.167676	-0.121714	0.903126	0.94427
Sbay_13.409	1394.92	1.12968	0.143256	7.88569	3.12795e-15	1.30114e-13
Sbay_13.410	2287.29	0.0329049	0.160479	0.205042	0.837539	0.899401
Sbay_13.411	642.803	0.500393	0.148815	3.36253	0.000772324	0.00353957
Sbay_13.412	639.842	0.717337	0.134909	5.3172	1.05376e-07	1.24744e-06
Sbay_13.413	2846.24	-0.105017	0.221686	-0.473718	0.635701	0.759747
Sbay_13.414	11149.8	0.0249909	0.14696	0.170052	0.864969	0.91767
Sbay_13.415	844.843	-0.0250649	0.146048	-0.171621	0.863736	0.917074
Sbay_13.416	73.2744	-1.08481	0.345735	-3.13768	0.00170292	0.00694012
Sbay_13.417	685.324	-0.342366	0.200822	-1.70482	0.0882272	0.17794
Sbay_13.418	659.323	0.217547	0.129934	1.67428	0.0940753	0.18684
Sbay_13.419	2923.94	0.129602	0.147747	0.877185	0.380386	0.532177
Sbay_13.420	292.568	-0.200973	0.20966	-0.958564	0.337779	0.490135
Sbay_13.421	1912.39	0.100425	0.105755	0.949595	0.342318	0.494093
Sbay_13.422	1719.85	-0.273543	0.135204	-2.02319	0.0430531	0.100267
Sbay_13.423	0	NA	NA	NA	NA	NA
Sbay_13.424	148.385	0.166166	0.339433	0.48954	0.62446	0.749902
Sbay_13.425	407.718	0.241339	0.157963	1.52782	0.126556	0.235499
Sbay_13.426	805.14	-0.380007	0.226019	-1.6813	0.0927037	0.184914
Sbay_13.427	12887.3	-0.0555163	0.154069	-0.360333	0.718598	0.820355
Sbay_13.428	2047.59	-0.0689096	0.168915	-0.407954	0.683307	0.795532
Sbay_13.429	28.5724	1.34767	0.359788	3.74572	0.000179874	0.00100885
Sbay_13.430	731.909	0.285797	0.161821	1.76614	0.0773729	0.161429
Sbay_13.431	1310.67	-0.540987	0.161756	-3.34447	0.000824388	0.00372124
Sbay_13.432	1242.46	-0.468862	0.138342	-3.38916	0.000701078	0.00325792
Sbay_13.433	0	NA	NA	NA	NA	NA
Sbay_13.434	6288.44	0.181149	0.265606	0.682023	0.495224	0.640552
Sbay_13.435	46.9843	1.75335	0.362123	4.84187	1.28622e-06	1.21139e-05
Sbay_13.436	46630.6	-0.711046	0.163038	-4.36123	1.29335e-05	9.86904e-05
Sbay_13.437	248.054	0.125602	0.173688	0.723145	0.469591	0.617123
Sbay_13.438	424.389	0.397835	0.147419	2.69868	0.00696161	0.0224919
Sbay_13.439	515.426	0.124557	0.171208	0.727519	0.466908	0.614431
Sbay_13.440	2177.53	-2.06804	0.184809	-11.1902	4.55506e-29	1.94891e-26
Sbay_13.441	494.688	-0.583067	0.172886	-3.37254	0.000744774	0.00343698
Sbay_13.442	1133.66	-0.472681	0.145927	-3.23915	0.00119887	0.00513679
Sbay_13.443	496.926	-0.00269431	0.234925	-0.0114688	0.990849	0.993503
Sbay_13.444	5860.57	-0.0709961	0.182962	-0.388038	0.697988	0.805728
Sbay_13.445	4148.3	-0.107634	0.144373	-0.745525	0.455954	0.603886
Sbay_13.446	717.211	0.309847	0.2509	1.23494	0.216852	0.352782
Sbay_13.447	359.572	-0.5275	0.148805	-3.54491	0.00039275	0.00198195
Sbay_13.448	646.385	0.548298	0.137099	3.99929	6.35319e-05	0.000411857
Sbay_13.449	671.626	0.127444	0.217933	0.584786	0.558692	0.698121
Sbay_13.450	1568.81	0.26327	0.262574	1.00265	0.316029	0.46695
Sbay_13.451	1662.37	0.658483	0.142658	4.61583	3.91535e-06	3.32666e-05
Sbay_13.452	222.804	0.249963	0.200986	1.24368	0.213617	0.349417
Sbay_13.453	129.844	0.814097	0.2902	2.8053	0.005027	0.0173374
Sbay_13.454	127.182	-0.536904	0.232036	-2.31388	0.0206744	0.0553349
Sbay_13.455	229.689	0.837049	0.215774	3.87928	0.000104766	0.000633885
Sbay_13.456	4.77361	0.178258	1.03913	0.171546	0.863795	0.917074
Sbay_13.457	27.5436	-0.0621926	0.374941	-0.165873	0.868257	0.919367
Sbay_13.458	20.9113	-0.237277	0.469102	-0.505811	0.612989	0.74118
Sbay_13.459	0	NA	NA	NA	NA	NA
Sbay_13.460	3640.39	0.388213	0.210697	1.84252	0.0653997	0.14036
Sbay_13.461	512.873	-0.0484672	0.157569	-0.307594	0.758391	0.848639
Sbay_13.462	71.4029	-0.378633	0.333992	-1.13366	0.256937	0.401736
Sbay_13.463	1056.73	-0.049841	0.15995	-0.311603	0.755342	0.846651
Sbay_13.464	1283.66	0.558371	0.163896	3.40687	0.000657126	0.00307755
Sbay_13.465	1116.74	-0.331627	0.12253	-2.70651	0.00679947	0.0220633
Sbay_13.466	1373.82	0.50935	0.137413	3.70671	0.000209968	0.00115281
Sbay_13.467	7.21984	-0.288111	0.693505	-0.415442	0.677818	0.791294
Sbay_13.468	511.64	-0.50506	0.301727	-1.6739	0.0941507	0.186928
Sbay_13.470	772.508	0.46064	0.223162	2.06415	0.0390037	0.092601
Sbay_13.471	599.886	-0.312793	0.160642	-1.94715	0.0515173	0.115447
Sbay_13.472	287.932	-0.291567	0.21636	-1.3476	0.177787	0.304095
Sbay_13.473	0	NA	NA	NA	NA	NA
Sbay_13.474	201.755	-0.148425	0.193276	-0.767943	0.442521	0.591249
Sbay_13.475	513.328	-0.370056	0.136106	-2.71889	0.00655021	0.0214286
Sbay_13.476	1829.92	0.967648	0.164311	5.88911	3.8828e-09	5.99433e-08
Sbay_13.477	968.925	0.682634	0.169602	4.02491	5.69959e-05	0.000373529
Sbay_13.478	366.624	0.570132	0.202489	2.81562	0.00486825	0.0168657
Sbay_13.479	515.412	0.0680385	0.155809	0.436679	0.662344	0.779764
Sbay_13.480	1270.76	0.318832	0.351494	0.907079	0.364365	0.515725
Sbay_13.481	2370.68	-0.486953	0.267127	-1.82293	0.0683141	0.145831
Sbay_13.482	124.982	-0.504019	0.29245	-1.72344	0.0848088	0.172263
Sbay_13.483	735.763	0.631251	0.138175	4.56849	4.91253e-06	4.07563e-05
Sbay_13.484	448.467	0.40819	0.16969	2.40551	0.01615	0.044982
Sbay_13.485	2694.38	-0.00122693	0.140293	-0.00874544	0.993022	0.995182
Sbay_13.486	2259.35	-0.382423	0.170161	-2.24742	0.0246133	0.0637689
Sbay_13.487	6956.31	0.572102	0.155727	3.67375	0.00023902	0.00127947
Sbay_13.488	1412.42	0.182067	0.159736	1.1398	0.25437	0.398764
Sbay_13.489	215.29	0.50086	0.177349	2.82415	0.00474062	0.0165576
Sbay_13.490	2808.45	-0.0848315	0.373201	-0.227308	0.820184	0.889763
Sbay_13.491	507.75	0.534563	0.169482	3.15411	0.00160991	0.00662774
Sbay_13.492	1753.21	-0.0628832	0.139443	-0.450959	0.652019	0.771704
Sbay_13.493	204.23	1.33796	0.205267	6.51814	7.11855e-11	1.45529e-09
Sbay_13.494	101.288	1.29182	0.262157	4.92767	8.32164e-07	8.11834e-06
Sbay_13.495	2374.43	0.0735337	0.135101	0.544286	0.586244	0.720527
Sbay_13.496	1084.11	0.576936	0.157445	3.66436	0.000247957	0.00131826
Sbay_13.498	66.1374	-0.214715	0.286133	-0.750402	0.453012	0.601673
Sbay_13.499	9954.42	0.290516	0.214656	1.3534	0.175927	0.301978
Sbay_13.500	1973.26	-0.530977	0.158469	-3.35066	0.000806191	0.0036501
Sbay_13.502	5620.4	-0.64769	0.153612	-4.2164	2.48231e-05	0.000176173
Sbay_13.503	804.27	-0.0212076	0.136212	-0.155696	0.876273	0.925238
Sbay_13.504	2048.7	-0.172316	0.138691	-1.24245	0.214072	0.350066
Sbay_13.505	150.985	0.449928	0.24995	1.80007	0.0718494	0.151862
Sbay_13.506	797.47	-0.0793969	0.174902	-0.453951	0.649864	0.770219
Sbay_13.507	1824.01	0.12973	0.158971	0.816063	0.414464	0.563802
Sbay_13.508	6019.03	-0.593971	0.262579	-2.26207	0.0236932	0.0619207
Sbay_13.509	3355.6	2.05866	0.194341	10.593	3.2103e-26	9.15699e-24
Sbay_13.510	110.811	2.39774	0.519307	4.61719	3.88963e-06	3.3142e-05
Sbay_13.511	2.24717	-2.00212	1.90254	-1.05234	0.292644	0.441991
Sbay_13.512	61.5846	2.66967	0.59526	4.48489	7.29524e-06	5.81097e-05
Sbay_13.513	2042.59	0.39378	0.107724	3.65546	0.000256718	0.00135963
Sbay_13.514	1860.77	-1.47576	0.915547	-1.61189	0.106986	0.206724
Sbay_13.515	444.026	0.0700911	0.257329	0.272379	0.78533	0.866163
Sbay_13.516	163.883	-0.361143	0.234955	-1.53708	0.124275	0.232991
Sbay_13.517	4.15901	0.47894	0.945313	0.506647	0.612403	0.740765
Sbay_14.1	231.123	-1.21129	0.232842	-5.20219	1.96956e-07	2.20517e-06
Sbay_14.3	9.18874	-0.664647	0.654285	-1.01584	0.309707	0.46022
Sbay_14.4	16.771	0.984704	0.477915	2.06042	0.0393589	0.0931488
Sbay_14.6	4.02641	1.80712	1.09134	1.65588	0.0977462	0.192789
Sbay_14.7	4.40895	-0.290599	0.919797	-0.315938	0.752049	0.844856
Sbay_14.8	0	NA	NA	NA	NA	NA
Sbay_14.9	6.33798	1.48121	0.838462	1.76658	0.0772985	0.16133
Sbay_14.10	765.061	2.0899	0.379083	5.51303	3.5271e-08	4.60291e-07
Sbay_14.11	1632.4	0.142415	0.117814	1.2088	0.226738	0.364901
Sbay_14.12	1812.97	0.345772	0.150994	2.28998	0.0220227	0.0584733
Sbay_14.13	76.3422	0.34424	0.242046	1.42221	0.154966	0.2739
Sbay_14.14	5237.21	-0.805	0.178967	-4.49803	6.8586e-06	5.49974e-05
Sbay_14.15	324.989	0.141453	0.15182	0.931715	0.351484	0.50188
Sbay_14.16	196.799	0.210519	0.196221	1.07287	0.283332	0.431824
Sbay_14.17	1070.06	0.309505	0.132253	2.34025	0.0192708	0.052208
Sbay_14.18	899.496	0.362776	0.179248	2.02388	0.0429826	0.100181
Sbay_14.19	1439.58	-0.165261	0.147635	-1.11938	0.262976	0.409086
Sbay_14.20	364.972	0.417196	0.153928	2.71034	0.00672152	0.0219009
Sbay_14.21	0.444518	2.65696	3.25428	0.81645	0.414243	0.563802
Sbay_14.22	321.97	-0.403878	0.174237	-2.31798	0.0204502	0.0549312
Sbay_14.23	458.068	-0.290069	0.15446	-1.87796	0.0603873	0.131678
Sbay_14.24	3211.3	1.14662	0.114992	9.97127	2.03605e-23	3.92311e-21
Sbay_14.25	487.215	0.144511	0.180006	0.802814	0.422082	0.571748
Sbay_14.26	537.19	0.637966	0.272162	2.34406	0.0190749	0.0518179
Sbay_14.27	264.411	-0.132801	0.298186	-0.445364	0.656057	0.774952
Sbay_14.28	144.812	-0.349366	0.23743	-1.47145	0.141169	0.255161
Sbay_14.29	444.406	1.05827	0.142544	7.42414	1.13513e-13	3.71553e-12
Sbay_14.30	118.35	-0.252328	0.243691	-1.03544	0.300462	0.450731
Sbay_14.31	2131.24	-0.111922	0.314605	-0.355753	0.722025	0.822856
Sbay_14.32	2475.36	-0.0195897	0.119882	-0.163408	0.870197	0.920934
Sbay_14.33	3230.83	0.771291	0.124409	6.19964	5.6592e-10	9.97017e-09
Sbay_14.34	2026.21	0.339212	0.250508	1.35409	0.175707	0.301744
Sbay_14.35	270.59	0.108166	0.15673	0.690142	0.490105	0.635989
Sbay_14.36	2.37732	-3.17088	1.59891	-1.98315	0.0473506	0.10768
Sbay_14.37	12647.7	-0.230712	0.143458	-1.60822	0.107788	0.207871
Sbay_14.38	7694.72	0.0469143	0.204707	0.229178	0.818731	0.889086
Sbay_14.40	361.983	-0.498787	0.299671	-1.66445	0.0960228	0.190015
Sbay_14.41	124.856	1.3055	0.462104	2.82511	0.00472643	0.0165177
Sbay_14.42	431.192	-0.703901	0.207767	-3.38794	0.000704193	0.00326733
Sbay_14.43	975.293	0.0907597	0.133379	0.680464	0.496211	0.641274
Sbay_14.44	517.877	0.162125	0.151549	1.06978	0.284717	0.433077
Sbay_14.45	232.975	-0.795373	0.161717	-4.91831	8.72946e-07	8.48855e-06
Sbay_14.46	379.008	-0.372113	0.154797	-2.40388	0.0162223	0.0450935
Sbay_14.47	1338.33	-0.0436004	0.21985	-0.198319	0.842796	0.903103
Sbay_14.48	130.98	0.669231	0.336127	1.991	0.0464805	0.106307
Sbay_14.49	588.356	0.71978	0.136483	5.27377	1.33651e-07	1.5249e-06
Sbay_14.50	61.1482	0.0230917	0.401049	0.0575783	0.954085	0.974496
Sbay_14.51	806.655	-0.277585	0.118803	-2.33652	0.0194644	0.0526373
Sbay_14.52	3221.25	-0.0708231	0.120629	-0.587116	0.557126	0.696621
Sbay_14.53	309.722	0.0812664	0.152811	0.53181	0.594857	0.728372
Sbay_14.54	0.245865	1.73959	4.08047	0.426321	0.669874	NA
Sbay_14.55	84.0383	1.12946	0.327319	3.45063	0.000559273	0.00268648
Sbay_14.56	0	NA	NA	NA	NA	NA
Sbay_14.57	2410.67	0.862377	0.119304	7.2284	4.88733e-13	1.44926e-11
Sbay_14.58	0.595961	3.1031	3.68753	0.841513	0.400061	0.550129
Sbay_14.59	0.245865	1.73959	4.08047	0.426321	0.669874	NA
Sbay_14.60	417.894	-0.890697	0.174148	-5.11459	3.14422e-07	3.31582e-06
Sbay_14.61	150.137	-0.11566	0.228362	-0.506476	0.612522	0.740765
Sbay_14.62	3526.7	-0.631798	0.208546	-3.02954	0.00244929	0.00936265
Sbay_14.63	2094.07	0.181565	0.16924	1.07283	0.283348	0.431824
Sbay_14.64	23.6348	0.739279	0.411423	1.79688	0.0723544	0.15266
Sbay_14.65	301.772	0.246579	0.259144	0.951513	0.341344	0.493519
Sbay_14.66	243.588	0.370241	0.295712	1.25203	0.210557	0.345734
Sbay_14.67	272.461	-0.272856	0.16442	-1.65951	0.0970138	0.191597
Sbay_14.68	6458.79	-0.45946	0.239241	-1.92049	0.0547958	0.121521
Sbay_14.69	213.998	-0.135457	0.213554	-0.634298	0.525886	0.667385
Sbay_14.70	751.166	0.172415	0.148831	1.15846	0.246676	0.389968
Sbay_14.71	1705.5	-0.679123	0.125437	-5.41405	6.16153e-08	7.78641e-07
Sbay_14.73	6.26954	0.86811	0.884096	0.981918	0.32614	0.476949
Sbay_14.74	0.109161	-0.183963	4.08047	-0.0450838	0.964041	NA
Sbay_14.75	3778.83	-0.848319	0.217063	-3.90817	9.29966e-05	0.00057192
Sbay_14.76	1317.17	-0.257379	0.137496	-1.8719	0.0612201	0.133107
Sbay_14.77	941.152	-0.0478432	0.18843	-0.253905	0.799569	0.87589
Sbay_14.78	1504.38	-0.332044	0.132427	-2.50737	0.0121632	0.0357146
Sbay_14.79	903.022	0.0530115	0.179055	0.296062	0.767183	0.854168
Sbay_14.80	541.338	-0.17546	0.177384	-0.989154	0.322588	0.473371
Sbay_14.81	259.51	-0.373991	0.169179	-2.21063	0.0270617	0.0690963
Sbay_14.82	83.8676	-0.163272	0.253508	-0.644051	0.519542	0.661918
Sbay_14.83	279.979	0.339461	0.225995	1.50207	0.133079	0.243849
Sbay_14.84	526.552	-0.387372	0.156148	-2.48081	0.0131085	0.0379327
Sbay_14.85	564.266	-0.366993	0.136831	-2.68209	0.00731638	0.023461
Sbay_14.86	579.334	-0.536651	0.17357	-3.09183	0.00198924	0.00786505
Sbay_14.87	7444.47	-0.412804	0.132098	-3.12498	0.00177817	0.00719193
Sbay_14.88	103.911	0.141147	0.334624	0.421809	0.673165	0.78755
Sbay_14.89	283.551	-0.674393	0.208418	-3.23578	0.00121312	0.00518301
Sbay_14.90	2846.67	0.942937	0.138812	6.79289	1.09911e-11	2.62297e-10
Sbay_14.91	1783.51	-0.23782	0.175727	-1.35335	0.175944	0.301978
Sbay_14.92	447.257	0.20462	0.154417	1.32511	0.185134	0.313352
Sbay_14.93	380.908	-0.374063	0.180874	-2.06809	0.0386315	0.0918629
Sbay_14.94	1474.81	-0.573786	0.23701	-2.42093	0.0154808	0.0434714
Sbay_14.95	2487.92	-0.0129824	0.167661	-0.0774326	0.938279	0.963864
Sbay_14.96	1171.69	-0.0104797	0.114825	-0.0912667	0.927281	0.958182
Sbay_14.97	206.29	0.0217985	0.192671	0.113139	0.909921	0.947828
Sbay_14.98	3309.24	-0.380475	0.155579	-2.44553	0.0144638	0.040983
Sbay_14.99	2517.31	0.548658	0.15781	3.4767	0.00050763	0.00248627
Sbay_14.100	616.179	0.223182	0.194733	1.14609	0.251757	0.395703
Sbay_14.101	2389.23	0.00916183	0.18539	0.0494191	0.960585	0.978555
Sbay_14.103	318.508	0.49489	0.179663	2.75454	0.00587742	0.019657
Sbay_14.105	6010.6	0.0773923	0.197276	0.392305	0.694833	0.803484
Sbay_14.106	820.851	-0.895937	0.151315	-5.92101	3.19978e-09	4.99133e-08
Sbay_14.107	41.3541	-0.103138	0.480373	-0.214705	0.829997	0.89451
Sbay_14.108	775.412	-0.198855	0.174578	-1.13906	0.254678	0.399038
Sbay_14.109	818.222	-1.00323	0.235611	-4.258	2.06266e-05	0.000150126
Sbay_14.110	266.897	0.145768	0.183219	0.795592	0.426269	0.575987
Sbay_14.111	636.522	-0.503096	0.128241	-3.92305	8.74347e-05	0.000541047
Sbay_14.112	1005.53	-0.410476	0.185324	-2.21492	0.0267657	0.0683987
Sbay_14.114	85.824	0.579911	0.253519	2.28745	0.0221696	0.0587593
Sbay_14.115	1955.23	-0.567726	0.112721	-5.03656	4.73979e-07	4.84494e-06
Sbay_14.116	326.407	0.13589	0.17814	0.762828	0.445566	0.594551
Sbay_14.117	123.589	-0.202923	0.204061	-0.994422	0.320017	0.471197
Sbay_14.118	838.405	0.382114	0.125687	3.04021	0.00236417	0.0091246
Sbay_14.119	473.656	-0.212219	0.172955	-1.22702	0.219816	0.35658
Sbay_14.120	280.636	-0.0755305	0.249445	-0.302794	0.762047	0.850664
Sbay_14.121	535.505	0.148526	0.260641	0.569849	0.56878	0.705235
Sbay_14.122	8524.67	-0.799651	0.24002	-3.3316	0.000863498	0.00386862
Sbay_14.123	884.212	0.123344	0.169706	0.726807	0.467344	0.614711
Sbay_14.124	201.913	0.843287	0.212187	3.97427	7.05963e-05	0.000451304
Sbay_14.125	977.053	-0.16412	0.189528	-0.86594	0.386523	0.537561
Sbay_14.126	822.279	-0.498014	0.168358	-2.95807	0.00309567	0.0114463
Sbay_14.127	966.881	0.246395	0.128488	1.91765	0.0551548	0.122136
Sbay_14.128	463.825	-0.304594	0.198675	-1.53313	0.125244	0.234046
Sbay_14.130	418.322	0.34188	0.136919	2.49694	0.0125269	0.0364963
Sbay_14.131	1462.14	-0.501507	0.156587	-3.20274	0.00136126	0.00570606
Sbay_14.132	151.067	-0.181026	0.217492	-0.832331	0.405222	0.555314
Sbay_14.133	0.297469	-1.28034	4.02169	-0.318358	0.750213	0.843346
Sbay_14.134	5159.55	0.605758	0.145255	4.17032	3.04175e-05	0.000212603
Sbay_14.135	9079.37	1.091	0.131956	8.26793	1.36307e-16	7.22546e-15
Sbay_14.136	624.74	-0.048745	0.289357	-0.16846	0.866222	0.918511
Sbay_14.137	128.856	-0.30733	0.227939	-1.3483	0.177561	0.303796
Sbay_14.138	14.3775	-0.504134	0.561455	-0.897907	0.369235	0.520282
Sbay_14.139	61.5509	-0.496048	0.484781	-1.02324	0.306194	0.456813
Sbay_14.140	304.721	-0.411671	0.19291	-2.134	0.0328427	0.0809246
Sbay_14.141	2078.54	0.270228	0.176032	1.53511	0.124757	0.233675
Sbay_14.142	865.18	-0.79999	0.159658	-5.01064	5.42481e-07	5.45212e-06
Sbay_14.143	3.03383	-2.54799	1.45767	-1.74798	0.080467	0.165749
Sbay_14.144	723.958	-0.473715	0.169643	-2.79242	0.00523149	0.0178576
Sbay_14.145	44.6449	0.308585	0.401862	0.767889	0.442553	0.591249
Sbay_14.146	1004.88	-0.920885	0.665901	-1.38292	0.16669	0.289833
Sbay_14.147	690.342	-0.212455	0.420297	-0.505488	0.613216	0.741304
Sbay_14.148	777.377	-0.182565	0.17716	-1.03051	0.30277	0.453712
Sbay_14.149	4515.08	0.344148	0.21543	1.59749	0.110156	0.211417
Sbay_14.150	175.989	0.980454	0.217529	4.50723	6.56787e-06	5.28784e-05
Sbay_14.151	5360.36	-0.980046	0.170138	-5.7603	8.39624e-09	1.22967e-07
Sbay_14.152	3155.36	-0.0303845	0.138154	-0.219932	0.825924	0.892518
Sbay_14.154	147.454	-0.35314	0.200326	-1.76283	0.0779296	0.162252
Sbay_14.155	118.636	0.796093	0.363463	2.1903	0.0285024	0.0720681
Sbay_14.156	1816.35	-0.335048	0.25831	-1.29708	0.194604	0.325973
Sbay_14.157	1311.93	1.15263	0.136827	8.42396	3.63969e-17	2.11668e-15
Sbay_14.158	696.886	-0.724191	0.155598	-4.65425	3.25164e-06	2.83341e-05
Sbay_14.159	666.961	-0.00604734	0.231591	-0.0261122	0.979168	0.988908
Sbay_14.160	725.225	1.056	0.160993	6.55927	5.4071e-11	1.14044e-09
Sbay_14.161	2409.31	-0.639252	0.274652	-2.3275	0.0199389	0.0537023
Sbay_14.162	91.8397	-0.720418	0.286466	-2.51484	0.0119085	0.0351292
Sbay_14.163	37327.2	-0.161108	0.111028	-1.45106	0.146762	0.262654
Sbay_14.164	2716.73	0.776623	0.12069	6.43485	1.23596e-10	2.41942e-09
Sbay_14.165	943.266	-0.618925	0.133711	-4.62881	3.67773e-06	3.14708e-05
Sbay_14.166	949.088	0.285874	0.269534	1.06062	0.288862	0.437603
Sbay_14.167	2318.3	0.323073	0.233119	1.38587	0.165785	0.288511
Sbay_14.168	292.77	0.345332	0.211421	1.63339	0.102387	0.199447
Sbay_14.169	870.822	-0.0714608	0.199658	-0.357917	0.720406	0.821792
Sbay_14.170	603.889	0.317106	0.128891	2.46026	0.0138837	0.0396838
Sbay_14.171	1015.53	-0.385799	0.123851	-3.11501	0.00183936	0.00739247
Sbay_14.172	438.139	-0.204539	0.154192	-1.32653	0.184666	0.312825
Sbay_14.173	233.151	-0.238197	0.171744	-1.38693	0.165463	0.288033
Sbay_14.174	242.591	-0.134324	0.202899	-0.662024	0.507956	0.652091
Sbay_14.175	1097.72	-0.0828235	0.151226	-0.54768	0.583912	0.71879
Sbay_14.176	24.0637	0.672987	0.488055	1.37892	0.16792	0.291211
Sbay_14.177	15189	-0.313242	0.130655	-2.39747	0.0165089	0.0457393
Sbay_14.178	851.658	-0.326068	0.160078	-2.03694	0.0416565	0.0975841
Sbay_14.179	17515.1	1.21834	0.241569	5.04345	4.57203e-07	4.6975e-06
Sbay_14.180	341.729	0.0863632	0.162647	0.530987	0.595428	0.728772
Sbay_14.181	240.902	0.416465	0.161142	2.58446	0.00975328	0.0297768
Sbay_14.182	1708.9	-0.0279756	0.160406	-0.174405	0.861547	0.915824
Sbay_14.183	2275.17	-0.0837684	0.185749	-0.450976	0.652007	0.771704
Sbay_14.184	1113.27	0.16367	0.154679	1.05813	0.289997	0.438657
Sbay_14.185	4454.22	-0.414359	0.114292	-3.62545	0.000288456	0.00151036
Sbay_14.186	513.707	-0.869858	0.173022	-5.02745	4.97045e-07	5.05484e-06
Sbay_14.187	270.613	-0.176125	0.160781	-1.09543	0.273328	0.421858
Sbay_14.188	258.589	0.440786	0.262522	1.67904	0.0931441	0.185606
Sbay_14.189	1316.84	0.0321145	0.167454	0.191781	0.847914	0.906965
Sbay_14.190	24.8527	-0.379027	0.467692	-0.810419	0.4177	0.566837
Sbay_14.191	143.558	-0.154244	0.190129	-0.811259	0.417217	0.566439
Sbay_14.192	1578.61	0.499864	0.114358	4.37104	1.23655e-05	9.48393e-05
Sbay_14.193	49.1712	-0.795975	0.337908	-2.3556	0.0184929	0.0504428
Sbay_14.194	46.7814	-0.119257	0.298865	-0.399034	0.689868	0.79975
Sbay_14.195	1921.87	0.83788	0.263016	3.18566	0.00144425	0.00601184
Sbay_14.196	23.6674	0.658737	0.454074	1.45072	0.146857	0.262667
Sbay_14.197	89.7342	1.63915	0.428494	3.82539	0.000130568	0.000769028
Sbay_14.198	1183.34	-0.367962	0.118997	-3.09219	0.00198688	0.00786091
Sbay_14.199	160.198	0.0409404	0.181924	0.225041	0.821948	0.891286
Sbay_14.200	3639.15	0.113267	0.114141	0.992335	0.321034	0.472016
Sbay_14.201	5083.37	1.04475	0.12029	8.68532	3.77691e-18	2.60043e-16
Sbay_14.202	652.42	0.366749	0.144395	2.53989	0.0110887	0.0331513
Sbay_14.203	5842.35	0.536804	0.12705	4.22515	2.38781e-05	0.000170071
Sbay_14.204	3865.76	1.40055	0.154146	9.0859	1.02848e-19	1.00993e-17
Sbay_14.205	209.629	0.522811	0.178904	2.9223	0.00347455	0.0126828
Sbay_14.206	0	NA	NA	NA	NA	NA
Sbay_14.207	885.056	-0.207506	0.246004	-0.843506	0.398946	0.548848
Sbay_14.208	4222.65	0.680685	0.128864	5.28218	1.27654e-07	1.46484e-06
Sbay_14.209	576.15	-0.236778	0.188305	-1.25742	0.208602	0.343466
Sbay_14.210	194.91	-0.588414	0.275873	-2.13292	0.0329314	0.081066
Sbay_14.211	5.46671	2.05916	1.03364	1.99214	0.0463561	0.106086
Sbay_14.212	678.01	0.0820933	0.149176	0.550311	0.582106	0.717895
Sbay_14.213	74.2561	-0.708217	0.278846	-2.53982	0.011091	0.0331513
Sbay_14.214	47.2788	-1.30399	0.405381	-3.21669	0.00129679	0.00547411
Sbay_14.215	838.72	-0.688032	0.137267	-5.01236	5.37676e-07	5.4129e-06
Sbay_14.216	406.548	0.440721	0.261362	1.68625	0.0917476	0.183373
Sbay_14.217	1142.29	0.0834268	0.161926	0.515215	0.606403	0.736861
Sbay_14.218	1218.96	0.402668	0.129591	3.10723	0.00188848	0.00755645
Sbay_14.219	4945.38	0.484466	0.148316	3.26645	0.00108904	0.00473012
Sbay_14.220	377.968	0.193473	0.35532	0.544503	0.586095	0.720527
Sbay_14.221	2437.38	-0.492295	0.145727	-3.3782	0.00072963	0.00337228
Sbay_14.222	78.9939	0.225245	0.392053	0.574527	0.565611	0.703219
Sbay_14.223	548.313	0.905058	0.175125	5.16808	2.36508e-07	2.58991e-06
Sbay_14.224	2476.57	-0.535405	0.198934	-2.69138	0.00711577	0.0228912
Sbay_14.225	509.109	0.329759	0.273377	1.20624	0.227724	0.366072
Sbay_14.226	725.622	0.287239	0.787724	0.364644	0.715377	0.817769
Sbay_14.228	534.447	-0.849807	0.430066	-1.97599	0.0481559	0.109098
Sbay_14.229	1649.47	-0.480043	0.255995	-1.8752	0.0607648	0.132309
Sbay_14.230	662.126	0.00208644	0.170801	0.0122156	0.990254	0.993072
Sbay_14.231	252.118	-0.662818	0.167373	-3.96013	7.49096e-05	0.000475831
Sbay_14.232	489.172	-0.46232	0.16085	-2.87423	0.0040502	0.0145187
Sbay_14.233	1675.51	-0.595415	0.220065	-2.70564	0.00681737	0.0220974
Sbay_14.234	0	NA	NA	NA	NA	NA
Sbay_14.236	373.974	0.37767	0.167653	2.25269	0.0242784	0.0632295
Sbay_14.237	342.13	0.260853	0.334388	0.780091	0.435338	0.584942
Sbay_14.238	791.91	-0.217816	0.163804	-1.32974	0.183605	0.311381
Sbay_14.239	1333.37	-1.28271	0.232638	-5.51375	3.51273e-08	4.59417e-07
Sbay_14.240	367.926	0.471642	0.150327	3.13744	0.00170433	0.00694012
Sbay_14.241	4552.84	0.426925	0.178565	2.39087	0.0168087	0.0464197
Sbay_14.242	499.682	0.333086	0.176892	1.88299	0.0597015	0.130468
Sbay_14.243	2.99143	-3.54178	1.508	-2.34866	0.0188414	0.0513232
Sbay_14.244	14740.1	0.166304	0.150063	1.10823	0.267764	0.414952
Sbay_14.245	217.208	0.0654075	0.204963	0.319119	0.749636	0.843146
[truncated: 4,419 more rows]
