# Supplementary material for: Integrative Omics Analysis Reveals a Limited Transcriptional Shock After Yeast Interspecies Hybridization
Source: Front Genet. 2020 May 7;11:404. doi: 10.3389/fgene.2020.00404 (PMC7221068; doi:10.3389/fgene.2020.00404)
Supplement: Supplementary file 9 [file Table_9.XLSX]

## Sheet: Table9
Supplementary table 9. Comparison between SC vs SU homeologs in the hybrid at 12 C. A. ASE analysis; B. list of ASE genes; C. GO analysis of ASE genes.
A.									B.			C.
gene_SC	gene_SU	baseMean	log2FoldChange	lfcSE	stat	pvalue	padj		Regulation	SC_ortholog		GO_category	Regulation	GOID	TERM	CORRECTED_PVALUE	UNCORRECTED_PVALUE	NUM_LIST_ANNOTATIONS	LIST_SIZE	TOTAL_NUM_ANNOTATIONS	POPULATION_SIZE	FDR_RATE	EXPECTED_FALSE_POSITIVES	ANNOTATED_GENES
YBR177C	Sbay_4.429	1623.33	-0.407975	0.14861	-2.74528	0.0060459	0.0114264		Up-regulated	YFL010C		Biological Process	Up-regulated	GO:0006012	galactose metabolic process	0.017119	2.09024e-05	5	208	13	7166	0.02	0.02	YBR018C, YLR081W, YKL127W, YBR019C, YBR020W
YIL140W	Sbay_9.48	166.183	0.119483	0.226684	0.527088	0.598133	0.665647		Up-regulated	YBR117C		Biological Process	Down-regulated	GO:0045229	external encapsulating structure organization	1.49082e-05	1.87998e-08	26	213	250	7166	0	0	YNL128W, YDL095W, YEL040W, YJR151C, YOR092W, YOR231W, YKL096W, YJL158C, YIL011W, YLR054C, YER011W, YOR242C, YGR225W, YIL015W, YCL048W, YDR523C, YOR010C, YGL028C, YBL043W, YLR330W, YOR009W, YOR298W, YOL048C, YMR104C, YDR273W, YHL028W
YLR268W	Sbay_10.366	599.833	-0.34297	0.129354	-2.6514	0.00801581	0.0147046		Up-regulated	YMR009W		Biological Process	Down-regulated	GO:0071555	cell wall organization	1.49082e-05	1.87998e-08	26	213	250	7166	0	0	YIL015W, YCL048W, YDR523C, YOR010C, YBL043W, YLR330W, YGL028C, YOR242C, YGR225W, YMR104C, YDR273W, YHL028W, YOR009W, YOR298W, YOL048C, YJR151C, YOR092W, YOR231W, YKL096W, YNL128W, YDL095W, YEL040W, YLR054C, YIL011W, YER011W, YJL158C
YOR011W	Sbay_15.188	48.6667	0.0865764	0.391293	0.221257	0.824892	0.861356		Up-regulated	YPL092W		Biological Process	Down-regulated	GO:1903046	meiotic cell cycle process	1.94884e-05	2.45755e-08	27	213	271	7166	0	0	YLL039C, YLR035C, YLR330W, YCL048W, YLR227C, YDR523C, YGR225W, YIL112W, YOR242C, YDR273W, YHL024W, YIL072W, YNL294C, YHR157W, YOR298W, YOL048C, YPR120C, YOR338W, YKL096W, YDL154W, YJL106W, YIL073C, YDR318W, YGL251C, YNL128W, YLR054C, YPL130W
YPL043W	Sbay_16.271	1234.27	-0.120989	0.129324	-0.935552	0.349504	0.42329		Up-regulated	YKL052C		Biological Process	Down-regulated	GO:0071554	cell wall organization or biogenesis	3.5028e-05	4.41715e-08	28	213	297	7166	0	0	YJL158C, YIL011W, YLR054C, YER011W, YNL128W, YPL221W, YDL095W, YEL040W, YJR151C, YOR092W, YOR231W, YKL096W, YOR009W, YOR298W, YOL048C, YMR104C, YNL294C, YDR273W, YHL028W, YOR242C, YGR225W, YIL015W, YCL048W, YDR523C, YOR010C, YLR330W, YBL043W, YGL028C
YJL155C	Sbay_6.234	688.667	0.719317	0.114475	6.28362	3.30782e-10	1.83273e-09		Up-regulated	YOR313C		Biological Process	Down-regulated	GO:0071852	fungal-type cell wall organization or biogenesis	5.15084e-05	6.49538e-08	24	213	230	7166	0	0	YLR054C, YIL011W, YER011W, YJL158C, YJR151C, YKL096W, YOR231W, YDL095W, YNL128W, YPL221W, YEL040W, YNL294C, YMR104C, YDR273W, YOR009W, YOL048C, YOR298W, YDR523C, YIL015W, YCL048W, YLR330W, YOR010C, YOR242C, YGR225W
YHR067W	Sbay_15.256	115.917	-1.06111	0.249489	-4.25314	2.10795e-05	6.17967e-05		Up-regulated	YGR126W		Biological Process	Down-regulated	GO:0031505	fungal-type cell wall organization	8.08364e-05	1.01937e-07	22	213	201	7166	0	0	YER011W, YIL011W, YLR054C, YJL158C, YKL096W, YOR231W, YJR151C, YEL040W, YDL095W, YNL128W, YDR273W, YMR104C, YOL048C, YOR298W, YOR009W, YLR330W, YOR010C, YDR523C, YIL015W, YCL048W, YGR225W, YOR242C
YAL008W	Sbay_1.60	404.515	0.0637543	0.13478	0.473025	0.636195	0.699748		Up-regulated	YJL149W		Biological Process	Down-regulated	GO:0048646	anatomical structure formation involved in morphogenesis	0.000129331	1.6309e-07	20	213	173	7166	0	0	YOR242C, YGR225W, YCL048W, YLR227C, YDR523C, YLL039C, YLR330W, YOR338W, YOR298W, YOL048C, YNL294C, YDR273W, YHL024W, YNL128W, YIL073C, YKL096W, YJL106W, YPL130W, YLR313C, YLR054C
YNR028W	Sbay_14.382	297.784	-0.230895	0.178409	-1.29419	0.195601	0.255682		Up-regulated	YBR182C		Biological Process	Down-regulated	GO:0010927	cellular component assembly involved in morphogenesis	0.000138939	1.75206e-07	13	213	73	7166	0	0	YNL128W, YOR242C, YGR225W, YDR523C, YCL048W, YLR330W, YKL096W, YLR313C, YPL130W, YOL048C, YOR298W, YLR054C, YDR273W
YMR111C	Sbay_13.290	216.995	0.418812	0.175099	2.39186	0.0167633	0.0287196		Up-regulated	YNL239W		Biological Process	Down-regulated	GO:0030437	ascospore formation	0.000145115	1.82995e-07	16	213	113	7166	0	0	YOR242C, YGR225W, YDR523C, YLR227C, YCL048W, YLR330W, YLL039C, YOR338W, YOL048C, YOR298W, YNL294C, YDR273W, YNL128W, YKL096W, YPL130W, YLR054C
YBR255W	Sbay_4.516	352.25	-0.376484	0.145577	-2.58616	0.00970528	0.0175249		Up-regulated	YNL145W		Biological Process	Down-regulated	GO:0048468	cell development	0.000145115	1.82995e-07	16	213	113	7166	0	0	YPL130W, YLR054C, YNL128W, YKL096W, YOL048C, YOR298W, YOR338W, YDR273W, YNL294C, YGR225W, YOR242C, YLR330W, YLL039C, YDR523C, YLR227C, YCL048W
YFR027W	Sbay_6.99	76.6667	-0.0382715	0.304266	-0.125783	0.899904	0.919949		Up-regulated	YDR525W-A		Biological Process	Down-regulated	GO:0051321	meiotic cell cycle	0.00017125	2.15952e-07	28	213	320	7166	0	0	YPL130W, YLR054C, YDR318W, YGL251C, YNL128W, YDL154W, YKL096W, YJL106W, YIL073C, YOR298W, YPR120C, YOL048C, YOR338W, YDR273W, YHL024W, YIL072W, YHR157W, YNL294C, YGR225W, YIL112W, YOR242C, YLR035C, YLL039C, YLR330W, YLR227C, YCL048W, YOR230W, YDR523C
YBR128C	Sbay_4.376	122	0.872096	0.238337	3.65909	0.000253113	0.000615686		Up-regulated	YOR303W		Biological Process	Down-regulated	GO:0034293	sexual sporulation	0.000267221	3.36975e-07	16	213	118	7166	0	0	YOL048C, YOR298W, YOR338W, YDR273W, YNL294C, YGR225W, YOR242C, YLR330W, YLL039C, YDR523C, YLR227C, YCL048W, YPL130W, YLR054C, YNL128W, YKL096W
YOL115W	Sbay_15.44	711.238	0.449193	0.136813	3.28327	0.00102611	0.00225006		Up-regulated	YMR266W		Biological Process	Down-regulated	GO:0043935	sexual sporulation resulting in formation of a cellular spore	0.000267221	3.36975e-07	16	213	118	7166	0	0	YNL128W, YKL096W, YPL130W, YLR054C, YOR242C, YGR225W, YDR523C, YCL048W, YLR227C, YLR330W, YLL039C, YOR338W, YOL048C, YOR298W, YNL294C, YDR273W
YDL214C	Sbay_4.33	78.9316	0.535973	0.323623	1.65616	0.0976887	0.138722		Up-regulated	YCL001W-A		Biological Process	Down-regulated	GO:0030435	sporulation resulting in formation of a cellular spore	0.000313627	3.95495e-07	19	213	166	7166	0	0	YNL294C, YDR273W, YHL024W, YOR338W, YOR298W, YOL048C, YCL048W, YLR227C, YDR523C, YLL039C, YLR330W, YOR242C, YGR225W, YLR054C, YPL130W, YIL073C, YKL096W, YJL106W, YNL128W
YLR016C	Sbay_10.96	241.083	-0.928775	0.181376	-5.12072	3.04378e-07	1.17013e-06		Up-regulated	YPL167C		Biological Process	Down-regulated	GO:0043934	sporulation	0.000415419	5.23857e-07	19	213	169	7166	0	0	YLR054C, YPL130W, YJL106W, YKL096W, YIL073C, YNL128W, YHL024W, YDR273W, YNL294C, YOL048C, YOR298W, YOR338W, YLR330W, YLL039C, YDR523C, YCL048W, YLR227C, YGR225W, YOR242C
YNL300W	Sbay_14.40	464.667	0.56798	0.164363	3.45564	0.000548979	0.00125918		Up-regulated	YDR155C		Biological Process	Down-regulated	GO:0009653	anatomical structure morphogenesis	0.0010037	1.26571e-06	21	213	214	7166	0	0	YLR313C, YPL130W, YLR054C, YNL128W, YIL073C, YJL106W, YKL096W, YOR338W, YOL048C, YOR298W, YNL294C, YMR104C, YHL024W, YDR273W, YOR242C, YGR225W, YDR523C, YLR227C, YCL048W, YLR330W, YLL039C
YAL056W	Sbay_1.10	532.657	-0.550476	0.149021	-3.69396	0.000220786	0.000540603		Up-regulated	YKR039W		Biological Process	Down-regulated	GO:0030476	ascospore wall assembly	0.00103039	1.29936e-06	10	213	49	7166	0	0	YLR330W, YCL048W, YDR523C, YGR225W, YOR242C, YNL128W, YDR273W, YLR054C, YOR298W, YOL048C
YGR148C	Sbay_7.439	12616.8	-0.0113377	0.0875352	-0.129521	0.896945	0.91801		Up-regulated	YNL015W		Biological Process	Down-regulated	GO:0042244	spore wall assembly	0.00103039	1.29936e-06	10	213	49	7166	0	0	YOR242C, YNL128W, YGR225W, YDR523C, YCL048W, YLR330W, YOL048C, YOR298W, YLR054C, YDR273W
YJR122W	Sbay_12.213	507.845	-1.21842	0.161884	-7.52652	5.21106e-14	4.13852e-13		Up-regulated	YLR205C		Biological Process	Down-regulated	GO:0070590	spore wall biogenesis	0.00103039	1.29936e-06	10	213	49	7166	0	0	YNL128W, YOR242C, YGR225W, YCL048W, YDR523C, YLR330W, YOR298W, YOL048C, YLR054C, YDR273W
YLR152C	Sbay_10.251	390.775	-1.62238	0.206055	-7.87352	3.44791e-15	3.0358e-14		Up-regulated	YBR161W		Biological Process	Down-regulated	GO:0070591	ascospore wall biogenesis	0.00103039	1.29936e-06	10	213	49	7166	0	0	YLR330W, YCL048W, YDR523C, YGR225W, YOR242C, YNL128W, YDR273W, YLR054C, YOR298W, YOL048C
YDR459C	Sbay_2.634	269.368	1.23969	0.18246	6.79432	1.08826e-11	6.891e-11		Up-regulated	YPL027W		Biological Process	Down-regulated	GO:0071940	fungal-type cell wall assembly	0.00125492	1.58249e-06	10	213	50	7166	0	0	YDR273W, YLR054C, YOL048C, YOR298W, YLR330W, YDR523C, YCL048W, YGR225W, YOR242C, YNL128W
YIL034C	Sbay_9.166	1228.92	-0.842256	0.0984945	-8.5513	1.21712e-17	1.31499e-16		Up-regulated	YBR183W		Biological Process	Down-regulated	GO:0048856	anatomical structure development	0.00135878	1.71347e-06	21	213	218	7166	0	0	YOR298W, YOL048C, YOR338W, YDR273W, YHL024W, YMR104C, YNL294C, YGR225W, YOR242C, YLL039C, YLR330W, YCL048W, YLR227C, YDR523C, YPL130W, YLR313C, YLR054C, YNL128W, YKL096W, YJL106W, YIL073C
YLR244C	Sbay_10.340	1982.75	0.485768	0.100018	4.85682	1.19284e-06	4.2168e-06		Up-regulated	YOL058W		Biological Process	Down-regulated	GO:0070726	cell wall assembly	0.00152092	1.91793e-06	10	213	51	7166	0	0	YOR242C, YNL128W, YGR225W, YDR523C, YCL048W, YLR330W, YOL048C, YOR298W, YLR054C, YDR273W
YNL003C	Sbay_14.345	404.917	-0.999801	0.205821	-4.85762	1.18803e-06	4.20555e-06		Up-regulated	YPL177C		Biological Process	Down-regulated	GO:0032989	cellular component morphogenesis	0.00397717	5.01535e-06	14	213	112	7166	0	0	YLR054C, YMR104C, YDR273W, YLR313C, YPL130W, YOL048C, YOR298W, YDR523C, YCL048W, YLR330W, YKL096W, YNL128W, YOR242C, YGR225W
YBR111W-A	Sbay_4.360	321.213	0.26755	0.149654	1.78779	0.0738097	0.10816		Up-regulated	YPR170W-B		Biological Process	Down-regulated	GO:0003006	developmental process involved in reproduction	0.00438595	5.53083e-06	17	213	162	7166	0	0	YOR338W, YOR298W, YOL048C, YNL294C, YDR273W, YOR242C, YGR225W, YCL048W, YLR227C, YDR523C, YLL039C, YLR330W, YPL130W, YLR313C, YLR054C, YNL128W, YKL096W
YJR084W	Sbay_12.172	325.667	-0.168647	0.157288	-1.07222	0.283623	0.353839		Up-regulated	YPL272C		Biological Process	Down-regulated	GO:0048869	cellular developmental process	0.0047868	6.03632e-06	25	213	315	7166	0	0	YLL039C, YLR330W, YCL048W, YLR310C, YLR227C, YDR523C, YGR225W, YOR242C, YDR273W, YHL024W, YDR026C, YMR104C, YNL294C, YOR298W, YGL014W, YOL048C, YGL208W, YOR338W, YKL096W, YJL106W, YIL073C, YNL128W, YLR054C, YPL130W, YLR313C
YBR135W	Sbay_4.383	355.038	0.745439	0.152498	4.8882	1.01765e-06	3.65732e-06		Up-regulated	YIR030C		Biological Process	Down-regulated	GO:0030154	cell differentiation	0.00495173	6.2443e-06	19	213	199	7166	0	0	YNL128W, YJL106W, YKL096W, YIL073C, YPL130W, YLR054C, YGR225W, YOR242C, YLR330W, YLL039C, YDR523C, YLR227C, YCL048W, YOL048C, YOR298W, YOR338W, YHL024W, YDR273W, YNL294C
YBR004C	Sbay_2.133	360.667	-0.899012	0.160622	-5.59706	2.18023e-08	9.68038e-08		Up-regulated	YLR081W		Biological Process	Down-regulated	GO:0022413	reproductive process in single-celled organism	0.00620832	7.8289e-06	16	213	149	7166	0	0	YOL048C, YOR298W, YOR338W, YDR273W, YNL294C, YGR225W, YOR242C, YLR330W, YLL039C, YDR523C, YCL048W, YLR227C, YPL130W, YLR054C, YNL128W, YKL096W
YBR160W	Sbay_4.411	767.833	0.949986	0.130422	7.28396	3.24172e-13	2.38124e-12		Up-regulated	YMR096W		Biological Process	Down-regulated	GO:0009272	fungal-type cell wall biogenesis	0.00688428	8.68131e-06	12	213	87	7166	0	0	YNL128W, YOR242C, YPL221W, YGR225W, YCL048W, YDR523C, YLR330W, YOR298W, YOL048C, YLR054C, YNL294C, YDR273W
YBR070C	Sbay_4.309	234.74	-0.0181306	0.172686	-0.104992	0.916382	0.933299		Up-regulated	YCR061W		Biological Process	Down-regulated	GO:0000003	reproduction	0.00805476	1.01573e-05	33	213	500	7166	0	0	YNL294C, YIL072W, YDR273W, YOL048C, YDR523C, YPR075C, YIL015W, YLR330W, YOR242C, YOR212W, YLR054C, YIL073C, YIR006C, YDL154W, YHR157W, YHL024W, YOR338W, YPR120C, YOR298W, YOR230W, YLR227C, YCL048W, YLR035C, YLL039C, YIL112W, YGR225W, YLR313C, YPL130W, YJL106W, YKL096W, YNL128W, YGL251C, YDR318W
YLR313C	Sbay_10.410	68.4724	-8.62563	1.21875	-7.07746	1.46824e-12	1.01524e-11		Up-regulated	YPL067C		Biological Process	Down-regulated	GO:0022414	reproductive process	0.010784	1.3599e-05	32	213	484	7166	0	0	YPL130W, YLR313C, YKL096W, YJL106W, YDR318W, YGL251C, YNL128W, YHL024W, YHR157W, YOR298W, YPR120C, YOR338W, YLR035C, YLL039C, YLR227C, YCL048W, YOR230W, YGR225W, YIL112W, YLR054C, YDL154W, YIL073C, YDR273W, YIL072W, YNL294C, YOL048C, YLR330W, YIL015W, YDR523C, YPR075C, YOR212W, YOR242C
YDL238C	Sbay_4.6	189.286	-0.271355	0.185548	-1.46245	0.143618	0.195129		Up-regulated	YBR133C		Biological Process	Down-regulated	GO:0032502	developmental process	0.0108099	1.36316e-05	25	213	330	7166	0	0	YPL130W, YLR313C, YLR054C, YNL128W, YIL073C, YKL096W, YJL106W, YGL208W, YOR338W, YOR298W, YGL014W, YOL048C, YMR104C, YDR026C, YNL294C, YDR273W, YHL024W, YOR242C, YGR225W, YCL048W, YLR310C, YLR227C, YDR523C, YLL039C, YLR330W
YJL082W	Sbay_6.155	1759.3	0.850122	0.100088	8.49376	2.00064e-17	2.13483e-16		Up-regulated	YMR281W		Biological Process	Down-regulated	GO:0019953	sexual reproduction	0.015771	1.98877e-05	20	213	235	7166	0	0	YLL039C, YLR330W, YLR227C, YCL048W, YIL015W, YDR523C, YPR075C, YGR225W, YOR212W, YOR242C, YDR273W, YNL294C, YOR298W, YOL048C, YOR338W, YKL096W, YNL128W, YLR054C, YPL130W, YLR313C
YHR007C	Sbay_8.63	4177.67	-0.214302	0.0874658	-2.45012	0.0142809	0.0247944		Up-regulated	YNR041C		Biological Process	Down-regulated	GO:0044703	multi-organism reproductive process	0.015771	1.98877e-05	20	213	235	7166	0	0	YLR054C, YLR313C, YPL130W, YKL096W, YNL128W, YDR273W, YNL294C, YOL048C, YOR298W, YOR338W, YLR330W, YLL039C, YPR075C, YDR523C, YLR227C, YCL048W, YIL015W, YGR225W, YOR212W, YOR242C
YIR004W	Sbay_9.213	1096.33	-0.169521	0.103507	-1.63777	0.101469	0.143697		Up-regulated	YJR119C		Biological Process	Down-regulated	GO:0032505	reproduction of a single-celled organism	0.0172193	2.17141e-05	18	213	198	7166	0	0	YOR338W, YOR298W, YOL048C, YNL294C, YDR273W, YOR242C, YGR225W, YLR227C, YCL048W, YDR523C, YLL039C, YLR330W, YPL130W, YLR313C, YLR054C, YNL128W, YKL096W, YIR006C
YPR133W-A	Sbay_16.461	1832.12	-0.306625	0.0931996	-3.28999	0.00100192	0.00220168		Up-regulated	YDR406W		Molecular Function	Up-regulated	GO:0005227	calcium activated cation channel activity	0.000728323	3.37187e-06	4	208	5	7166	0	0	YMR266W, YOL084W, YOR087W, YLL005C
YPL191C	Sbay_16.115	263.75	1.40989	0.182035	7.74516	9.5459e-15	8.0496e-14		Up-regulated	YOR186W		Molecular Function	Up-regulated	GO:0005261	cation channel activity	0.00951639	4.40574e-05	4	208	8	7166	0	0	YOR087W, YLL005C, YMR266W, YOL084W
YKL190W	Sbay_11.33	881.45	0.69982	0.109737	6.37727	1.80269e-10	1.0262e-09		Up-regulated	YBL029C-A		Molecular Function	Up-regulated	GO:0140135	mechanosensitive cation channel activity	0.00951639	4.40574e-05	4	208	8	7166	0	0	YLL005C, YOR087W, YMR266W, YOL084W
YGL215W	Sbay_7.45	827.577	-4.58449	0.168912	-27.1412	3.2119e-162	1.85077e-159		Up-regulated	YPL054W		Molecular Function	Up-regulated	GO:0022857	transmembrane transporter activity	0.016745	7.7523e-05	25	208	375	7166	0	0	YKR093W, YOR087W, YCL025C, YMR266W, YDR406W, YHR096C, YDR338C, YHL008C, YOR348C, YMR319C, YBR147W, YLL005C, YIL120W, YGR281W, YLR004C, YKR050W, YBR294W, YLR081W, YPL092W, YKR039W, YPL189W, YOR390W, YIL121W, YLR237W, YOL084W
YDR312W	Sbay_2.479	176.16	-0.422513	0.232877	-1.81432	0.0696291	0.102497		Up-regulated	YBR018C		Molecular Function	Up-regulated	GO:0015193	L-proline transmembrane transporter activity	0.0203865	9.43819e-05	3	208	4	7166	0	0	YKR039W, YCL025C, YOR348C
YLR348C	Sbay_10.449	419.513	0.287121	0.167059	1.71868	0.0856725	0.123348		Up-regulated	YMR244W		Molecular Function	Up-regulated	GO:0005215	transporter activity	0.0232621	0.000107695	26	208	406	7166	0	0	YCL025C, YMR266W, YKR093W, YOR087W, YHL008C, YOR237W, YHR096C, YDR406W, YDR338C, YGR281W, YLR004C, YKR050W, YBR294W, YOR348C, YBR147W, YMR319C, YLL005C, YIL120W, YKR039W, YIL121W, YOR390W, YPL189W, YOL084W, YLR237W, YLR081W, YPL092W
YBR248C	Sbay_4.509	881.583	-0.380881	0.126513	-3.0106	0.00260735	0.00532351		Up-regulated	YJR086W		Molecular Function	Up-regulated	GO:0008381	mechanosensitive ion channel activity	0.0418782	0.00019388	4	208	11	7166	0.0029	0.02	YMR266W, YOL084W, YLL005C, YOR087W
YNR067C	Sbay_14.425	1063.54	-0.640078	0.13083	-4.89245	9.95892e-07	3.59158e-06		Up-regulated	YLR237W		Molecular Function	Up-regulated	GO:0022836	gated channel activity	0.0418782	0.00019388	4	208	11	7166	0.0025	0.02	YLL005C, YOR087W, YMR266W, YOL084W
YNL152W	Sbay_14.187	241.667	0.0594585	0.169198	0.351414	0.725277	0.777769		Up-regulated	YIL121W		Molecular Function	Up-regulated	GO:0022839	ion gated channel activity	0.0418782	0.00019388	4	208	11	7166	0.0022	0.02	YOL084W, YMR266W, YOR087W, YLL005C
YLR382C	Sbay_10.499	2013.37	-0.900541	0.0998031	-9.02318	1.82706e-19	2.29422e-18		Up-regulated	YKL149C		Cellular Component	Up-regulated	GO:0071944	cell periphery	0.00010275	6.00878e-07	49	208	829	7166	0	0	YNL145W, YPL092W, YBR067C, YOR104W, YIL120W, YKR093W, YBR294W, YJR150C, YOL084W, YMR017W, YJR086W, YBR183W, YMR008C, YLR187W, YLL005C, YOR247W, YLR121C, YLR042C, YGR213C, YGR014W, YOR190W, YOR087W, YCL025C, YBR093C, YCL024W, YLR081W, YOR348C, YGR281W, YLR004C, YNL047C, YBR148W, YHR096C, YOR390W, YGR263C, YMR319C, YGR238C, YKR039W, YLR237W, YFL026W, YLR262C, YBL060W, YDR406W, YBR133C, YKR050W, YMR…
YKL063C	Sbay_11.162	503.87	0.177059	0.134866	1.31285	0.189232	0.248445		Up-regulated	YGL183C		Cellular Component	Up-regulated	GO:0005886	plasma membrane	0.000183494	1.07307e-06	37	208	553	7166	0	0	YMR017W, YOL084W, YBR294W, YKR093W, YOR104W, YPL092W, YNL145W, YIL120W, YLR121C, YGR014W, YGR213C, YMR008C, YLR187W, YLL005C, YJR086W, YHR096C, YMR319C, YOR390W, YGR281W, YOR348C, YLR004C, YNL047C, YLR081W, YOR087W, YCL025C, YIL121W, YJL163C, YBL029C-A, YML006C, YMR266W, YKR050W, YDR406W, YLR262C, YBL060W, YKR039W, YFL026W, YLR237W
YFL045C	Sbay_6.8	5476.83	0.1611	0.0921047	1.7491	0.0802736	0.116372		Up-regulated	YBR066C		Cellular Component	Up-regulated	GO:0031226	intrinsic component of plasma membrane	0.000659027	3.85396e-06	15	208	128	7166	0	0	YLR081W, YKR039W, YFL026W, YIL120W, YOR087W, YHR096C, YLR121C, YIL121W, YMR319C, YJL163C, YGR014W, YOR390W, YBR294W, YKR050W, YLR004C
YFL010C	Sbay_6.50	809.493	1.71021	0.139038	12.3003	9.02387e-35	2.73671e-33		Up-regulated	YKL159C		Cellular Component	Up-regulated	GO:0031224	intrinsic component of membrane	0.000669073	3.91271e-06	65	208	1318	7166	0	0	YGR101W, YKR039W, YFL026W, YDR338C, YIL121W, YOR044W, YJL163C, YOR186W, YDR307W, YDR281C, YCL025C, YOR324C, YGL057C, YLR081W, YGR281W, YBR147W, YOR390W, YGL088W, YER001W, YGR263C, YBR183W, YMR008C, YLL005C, YHL008C, YGR049W, YIL117C, YGR213C, YLR042C, YGR014W, YJL172W, YNR041C, YPL092W, YLR205C, YBR067C, YBL059W, YOR104W, YIL155C, YKR093W, YDL211C, YMR281W, YPR170W-B, YLR237W, YLR265C, YDR406W, Y…
YDR141C	Sbay_2.302	677.436	-0.0261818	0.121306	-0.215833	0.829118	0.864109		Up-regulated	YPL052W		Cellular Component	Up-regulated	GO:0005887	integral component of plasma membrane	0.00162467	9.50102e-06	14	208	121	7166	0	0	YMR319C, YJL163C, YGR014W, YOR390W, YBR294W, YHR096C, YIL121W, YLR004C, YKR050W, YLR081W, YFL026W, YOR087W, YIL120W, YKR039W
YJL131C	Sbay_6.211	616.144	-0.29244	0.125474	-2.33069	0.0197698	0.0333298		Up-regulated	YLR146W-A		Cellular Component	Up-regulated	GO:0016021	integral component of membrane	0.0042987	2.51386e-05	60	208	1249	7166	0	0	YDR406W, YMR266W, YKR050W, YGR177C, YKR005C, YMR244W, YIL121W, YOR044W, YDR525W-A, YJL163C, YGR101W, YKR039W, YLR237W, YFL026W, YDR338C, YLR265C, YOR348C, YGR281W, YLR004C, YBR147W, YHR096C, YOR390W, YMR319C, YER001W, YGL088W, YGR263C, YDR307W, YOR186W, YDR281C, YCL025C, YOR087W, YOR324C, YGL057C, YLR081W, YIL117C, YNL046W, YPL189W, YGR213C, YDR438W, YJL172W, YNR041C, YGR014W, YBR183W, YLL005C, Y…
YDL170W	Sbay_4.76	350.672	1.46129	0.166735	8.76414	1.88213e-18	2.18361e-17		Up-regulated	YPR145W		Cellular Component	Up-regulated	GO:0044459	plasma membrane part	0.00754384	4.4116e-05	16	208	175	7166	0	0	YOR087W, YIL120W, YLR081W, YLR004C, YHR096C, YMR319C, YOR390W, YBR294W, YKR039W, YJR086W, YFL026W, YKR050W, YLR121C, YIL121W, YGR014W, YJL163C
YBR117C	Sbay_4.364	289.167	1.64298	0.16946	9.69538	3.15459e-22	4.97255e-21		Up-regulated	YOR087W		Cellular Component	Down-regulated	GO:0009277	fungal-type cell wall	0.000274294	1.5764e-06	16	213	132	7166	0	0	YBR092C, YPL130W, YOR010C, YER011W, YCL048W, YJL052W, YJR151C, YGL028C, YOL048C, YOR009W, YEL040W, YKL096W, YOR242C, YJL158C, YIL011W, YIL015W
YGL135W	Sbay_16.86	12538.3	-1.01262	0.0767193	-13.199	8.89032e-40	3.29323e-38		Up-regulated	YKL127W		Cellular Component	Down-regulated	GO:0005618	cell wall	0.000497824	2.86106e-06	16	213	138	7166	0	0	YOR010C, YPL130W, YBR092C, YGL028C, YJR151C, YJL052W, YER011W, YCL048W, YOL048C, YEL040W, YOR009W, YKL096W, YIL011W, YIL015W, YJL158C, YOR242C
YJR044C	Sbay_12.127	608.167	0.617782	0.141761	4.35791	1.31313e-05	3.98473e-05		Up-regulated	YBL029W		Cellular Component	Down-regulated	GO:0030312	external encapsulating structure	0.000497824	2.86106e-06	16	213	138	7166	0	0	YGL028C, YJL052W, YJR151C, YCL048W, YER011W, YOR010C, YPL130W, YBR092C, YIL011W, YIL015W, YJL158C, YOR242C, YKL096W, YOL048C, YEL040W, YOR009W
YJL140W	Sbay_6.220	1221.77	-0.0158596	0.107616	-0.147372	0.882838	0.907692		Up-regulated	YML017W		Cellular Component	Down-regulated	GO:0071944	cell periphery	0.00122927	7.06477e-06	47	213	829	7166	0	0	YBR092C, YLR407W, YLR411W, YOR273C, YOR010C, YDR038C, YGR241C, YNL209W, YCR021C, YOR212W, YPR075C, YER060W, YKL209C, YKL096W, YPR183W, YOL048C, YEL040W, YOR242C, YGL181W, YNL294C, YIL011W, YGL208W, YIL015W, YDR497C, YPL130W, YDR039C, YDL124W, YBR054W, YLR310C, YLR313C, YIR006C, YGR254W, YCL048W, YER103W, YER011W, YOL122C, YGL255W, YJR151C, YJL052W, YGL028C, YLR130C, YOR009W, YJL158C, YDR033W, YER…
YJR011C	Sbay_12.96	92.2025	1.17496	0.279811	4.19913	2.67948e-05	7.7156e-05		Up-regulated	YGR281W		Cellular Component	Down-regulated	GO:0005628	prospore membrane	0.0116105	6.67272e-05	10	213	75	7166	0.02	0.1	YKL096W, YDR523C, YPL130W, YOL048C, YGR241C, YDR273W, YLR054C, YOR242C, YOL015W, YFR032C
YPL039W	Sbay_16.277	194.429	0.322836	0.228368	1.41367	0.157459	0.211605		Up-regulated	YGR014W		Cellular Component	Down-regulated	GO:0042763	intracellular immature spore	0.0116105	6.67272e-05	10	213	75	7166	0.0167	0.1	YOR242C, YOL015W, YFR032C, YDR523C, YKL096W, YPL130W, YOL048C, YGR241C, YDR273W, YLR054C
YKL048C	Sbay_11.178	137.696	-1.25413	0.258268	-4.85592	1.1983e-06	4.23325e-06		Up-regulated	YGR238C		Cellular Component	Down-regulated	GO:0042764	ascospore-type prospore	0.0116105	6.67272e-05	10	213	75	7166	0.0143	0.1	YPL130W, YDR523C, YKL096W, YOL048C, YLR054C, YDR273W, YGR241C, YOR242C, YOL015W, YFR032C
YDR083W	Sbay_2.243	769.001	0.809584	0.125879	6.43144	1.26403e-10	7.25942e-10		Up-regulated	YGR263C		Cellular Component	Down-regulated	GO:0031225	anchored component of membrane	0.0226083	0.000129933	9	213	66	7166	0.0175	0.14	YJR151C, YIL011W, YER011W, YCL048W, YOR010C, YEL040W, YOR009W, YPL130W, YKL096W
YMR009W	Sbay_13.172	2646.25	1.64303	0.107118	15.3386	4.22374e-53	2.7727e-51		Up-regulated	YMR310C		Cellular Component	Down-regulated	GO:0005576	extracellular region	0.0379078	0.000217861	12	213	120	7166	0.0178	0.16	YER065C, YIL015W, YGL028C, YIL011W, YJR151C, YJL158C, YER011W, YOR010C, YKL096W, YPL130W, YEL040W, YOR009W
YPR064W	Sbay_16.391	0.373741	-0.708249	4.0837	-0.173433	0.862311	0.890283		Up-regulated	YKR005C		Cellular Component	Down-regulated	GO:0031224	intrinsic component of membrane	0.0447175	0.000256997	60	213	1318	7166	0.016	0.16	YBR284W, YNL294C, YDR284C, YGL126W, YIL011W, YKL209C, YKL096W, YPR183W, YER060W, YEL040W, YOL048C, YJL118W, YCR021C, YNL237W, YPR063C, YLL015W, YPR075C, YNL270C, YGR168C, YLR411W, YCR067C, YOR320C, YLR152C, YDR038C, YOR273C, YOR010C, YOR100C, YOR298W, YOR092W, YPL221W, YDR033W, YHL028W, YER056C, YIL013C, YLR164W, YHL040C, YER053C-A, YDR089W, YLR130C, YOR009W, YCL048W, YNL080C, YOL122C, YER011W, Y…
YIR013C	Sbay_9.224	1.58821	1.19952	1.75953	0.681727	0.495412	0.570048		Up-regulated	YER084W
YJL122W	Sbay_6.201	583.29	-0.498685	0.129356	-3.85514	0.000115665	0.00029977		Up-regulated	YDL021W
YKL188C	Sbay_11.36	155.333	-0.372138	0.216175	-1.72147	0.0851656	0.122686		Up-regulated	YBL060W
YLR189C	Sbay_10.285	494.667	-1.01669	0.138182	-7.35765	1.87175e-13	1.40476e-12		Up-regulated	YBR019C
YDR363W	Sbay_2.534	289.512	0.107469	0.159676	0.673043	0.50092	0.575222		Up-regulated	YBR148W
YFL021W	Sbay_6.37	98.5099	-0.986499	0.3124	-3.15781	0.00158959	0.00337025		Up-regulated	YPL113C
YPL194W	Sbay_16.112	151.365	0.343229	0.210373	1.63152	0.10278	0.145276		Up-regulated	YFR023W
YLR362W	Sbay_10.464	436.21	-0.389995	0.133231	-2.92721	0.00342022	0.00676478		Up-regulated	YKR029C
YPL092W	Sbay_16.220	200.917	2.64053	0.303346	8.70468	3.18478e-18	3.63794e-17		Up-regulated	YDR249C
YOR377W	Sbay_8.434	478	0.408246	0.14715	2.77436	0.00553112	0.010538		Up-regulated	YIL120W
YMR283C	Sbay_13.472	244.357	-0.500856	0.170362	-2.93994	0.00328273	0.00652019		Up-regulated	YJR159W
YOR074C	Sbay_8.123	453.583	0.655781	0.144544	4.53689	5.70912e-06	1.81753e-05		Up-regulated	YIL045W
YPL024W	Sbay_16.294	136.667	-0.507131	0.251322	-2.01785	0.0436067	0.0676269		Up-regulated	YOR028C
YKL134C	Sbay_11.91	354.391	0.712668	0.167596	4.2523	2.11584e-05	6.19929e-05		Up-regulated	YJR097W
YPL165C	Sbay_16.145	17.75	-3.49077	0.873249	-3.99745	6.40289e-05	0.000172496		Up-regulated	YEL021W
YGR144W	Sbay_7.434	22.1634	0.185819	0.472023	0.393664	0.693829	0.751495		Up-regulated	YGL159W
YDR090C	Sbay_2.251	260.5	0.868216	0.18072	4.80421	1.55362e-06	5.41835e-06		Up-regulated	YGL121C
YIL108W	Sbay_9.87	590.112	-0.273938	0.135973	-2.01465	0.043941	0.068003		Up-regulated	YLR042C
YLR307C-A	Sbay_10.403	0.332386	-1.04819	4.35624	-0.240619	0.809851	0.847948		Up-regulated	YIL152W
YKL052C	Sbay_11.174	663.324	2.00727	0.148048	13.5582	7.08166e-42	2.96173e-40		Up-regulated	YOL084W
YBR273C	Sbay_4.534	968.509	-0.409918	0.103135	-3.97459	7.04999e-05	0.000188752		Up-regulated	YMR280C
YFR005C	Sbay_6.68	428.659	0.522281	0.158516	3.29482	0.000984857	0.00217062		Up-regulated	YMR017W
YOR313C	Sbay_8.364	48.517	1.92285	0.477769	4.02464	5.70629e-05	0.000154774		Up-regulated	YMR173W
YER093C-A	Sbay_5.212	321.497	-0.879796	0.15258	-5.76612	8.11165e-09	3.81387e-08		Up-regulated	YHR075C
YAL026C	Sbay_1.40	553	0.113387	0.130165	0.8711	0.383699	0.460084		Up-regulated	YDR281C
YOL034W	Sbay_15.133	298.594	0.305954	0.164621	1.85854	0.063093	0.0938713		Up-regulated	YOR012W
YJR135W-A	Sbay_12.227	622.776	-0.464865	0.134349	-3.46014	0.000539889	0.00123943		Up-regulated	YDL211C
YFL017W-A	Sbay_6.42	122.607	-0.0933413	0.222571	-0.419378	0.67494	0.735146		Up-regulated	YLR281C
YFR050C	Sbay_12.7	2093.33	-0.130376	0.102232	-1.27529	0.202205	0.263146		Up-regulated	YGL067W
YBL008W	Sbay_2.117	267.667	0.108808	0.161537	0.673576	0.500581	0.575103		Up-regulated	YNL047C
YLR079W	Sbay_10.162	872.964	-0.148181	0.11786	-1.25726	0.208658	0.270554		Up-regulated	YCL024W
YLR447C	Sbay_10.565	4065.42	0.19566	0.0863252	2.26654	0.0234183	0.0387886		Up-regulated	YNL046W
YGL237C	Sbay_7.23	293.17	0.0553018	0.154966	0.356863	0.721194	0.774992		Up-regulated	YBR020W
YGR126W	Sbay_7.414	334.583	2.04784	0.163435	12.53	5.11603e-36	1.63776e-34		Up-regulated	YER037W
YIL062C	Sbay_9.139	1439.25	-0.223394	0.0963303	-2.31904	0.020393	0.0343259		Up-regulated	YER175C
YNL295W	Sbay_14.44	385.295	0.374562	0.150944	2.48146	0.0130845	0.0229321		Up-regulated	YBR033W
YDR016C	Sbay_2.166	246.121	0.328128	0.186188	1.76234	0.0780112	0.113578		Up-regulated	YKL132C
YNR032C-A	Sbay_14.387	314.841	1.36086	0.153912	8.84181	9.4178e-19	1.1332e-17		Up-regulated	YDR179C
YPL059W	Sbay_16.255	1479.83	-1.45902	0.101207	-14.4162	4.09187e-47	2.10103e-45		Up-regulated	YDR453C
YAR019C	Sbay_1.86	283	0.476616	0.161486	2.95144	0.00316295	0.00630645		Up-regulated	YJL164C
YDR299W	Sbay_2.465	575.579	0.197198	0.143766	1.37166	0.170169	0.226593		Up-regulated	YIL117C
YOL116W	Sbay_15.43	308.516	0.0975738	0.168789	0.578083	0.563208	0.633991		Up-regulated	YCL025C
YJL149W	Sbay_6.229	415.662	1.59077	0.154703	10.2828	8.42821e-25	1.58941e-23		Up-regulated	YIL155C
YBR182C	Sbay_4.433	245.417	2.64444	0.20372	12.9808	1.57285e-38	5.51136e-37		Up-regulated	YOR019W
YKL088W	Sbay_11.137	880.466	1.12547	0.129881	8.66534	4.50169e-18	5.06416e-17		Up-regulated	YOR044W
YDR196C	Sbay_2.364	442.25	-1.45155	0.146507	-9.90767	3.85535e-23	6.42889e-22		Up-regulated	YOR134W
YMR175W	Sbay_13.356	35.7496	1.26965	0.386124	3.2882	0.00100832	0.00221292		Up-regulated	YHR205W
YBR202W	Sbay_4.457	817.917	0.701908	0.126064	5.56788	2.57859e-08	1.13616e-07		Up-regulated	YOR236W
YHR101C	Sbay_15.296	331.307	0.894393	0.149336	5.98914	2.10955e-09	1.06525e-08		Up-regulated	YDR106W
YNL239W	Sbay_14.105	2186.79	1.62896	0.12452	13.082	4.17317e-39	1.49256e-37		Up-regulated	YDR461C-A
YDR410C	Sbay_2.587	110.063	1.04191	0.25219	4.13147	3.6045e-05	0.000101262		Up-regulated	YLR121C
YBR280C	Sbay_4.540	743.633	1.02518	0.135477	7.5672	3.81354e-14	3.0662e-13		Up-regulated	YDR446W
YGR020C	Sbay_7.301	2257.58	0.364369	0.088811	4.10275	4.0827e-05	0.000113284		Up-regulated	YJR094C
YNR045W	Sbay_14.400	413.333	-0.0418114	0.165161	-0.253155	0.800148	0.839667		Up-regulated	YFL027C
YPL143W	Sbay_16.168	11487.9	-0.111835	0.0794871	-1.40696	0.159439	0.21388		Up-regulated	YBR147W
YML105C	Sbay_13.39	1112.3	0.212839	0.103209	2.06222	0.0391868	0.0615081		Up-regulated	YHL008C
YLL040C	Sbay_10.29	1346.45	0.336222	0.106316	3.16249	0.00156426	0.00332332		Up-regulated	YER142C
YLR314C	Sbay_10.411	1858.84	-0.227653	0.0969868	-2.34726	0.0189122	0.0320205		Up-regulated	YDR180W
YIL091C	Sbay_9.108	641.69	0.329571	0.13032	2.52894	0.0114406	0.0203397		Up-regulated	YGR177C
YOR234C	Sbay_8.285	5211.05	0.0567149	0.0852615	0.665188	0.50593	0.579579		Up-regulated	YLR438W
YOR322C	Sbay_8.374	741.664	0.468817	0.138493	3.38512	0.000711465	0.0016035		Up-regulated	YBR089C-A
YML092C	Sbay_13.56	1861	0.0495057	0.0978093	0.506145	0.612755	0.679296		Up-regulated	YPR052C
YLR357W	Sbay_10.458	652.293	-0.0150754	0.14127	-0.106714	0.915016	0.932274		Up-regulated	YEL019C
YPL104W	Sbay_16.208	1064.58	-1.46866	0.147898	-9.93025	3.07492e-23	5.17744e-22		Up-regulated	YLL005C
YNL103W	Sbay_14.236	484.921	-0.550244	0.147847	-3.72172	0.000197867	0.000489313		Up-regulated	YJL162C
YAL046C	Sbay_1.18	329.368	0.338085	0.154956	2.18181	0.0291237	0.0472724		Up-regulated	YDR514C
YDR198C	Sbay_2.366	207.707	-0.788625	0.190422	-4.14146	3.45106e-05	9.73203e-05		Up-regulated	YLR364W
YAL039C	Sbay_1.26	1393.81	-0.845898	0.13663	-6.19115	5.97252e-10	3.22641e-09		Up-regulated	YLR004C
YDL200C	Sbay_4.48	106.5	1.35364	0.239353	5.65542	1.55469e-08	7.04159e-08		Up-regulated	YPL189W
YNR018W	Sbay_14.372	1203	0.796857	0.13886	5.73857	9.54778e-09	4.46079e-08		Up-regulated	YGL179C
YNL168C	Sbay_14.170	571.333	-0.677091	0.121235	-5.58494	2.33782e-08	1.0327e-07		Up-regulated	YDR438W
YDL185W	Sbay_4.63	9138.1	0.625766	0.0780693	8.01551	1.09679e-15	1.0139e-14		Up-regulated	YMR095C
YFR047C	Sbay_12.10	731.56	-0.339541	0.127654	-2.65986	0.00781737	0.0143874		Up-regulated	YBR067C
YBR215W	Sbay_4.473	459.842	1.02569	0.150137	6.83172	8.39004e-12	5.3717e-11		Up-regulated	YNL024C
YGL092W	Sbay_7.177	1284.58	0.342358	0.115985	2.95175	0.00315975	0.00630249		Up-regulated	YER054C
YLR403W	Sbay_10.519	714.74	0.00885274	0.123047	0.0719461	0.942645	0.953549		Up-regulated	YKR015C
YNL240C	Sbay_14.103	303.985	-0.299475	0.215789	-1.38782	0.165193	0.221025		Up-regulated	YOR190W
YBR159W	Sbay_4.410	1348.67	0.487529	0.104909	4.64716	3.36535e-06	1.1046e-05		Up-regulated	YER001W
YDR364C	Sbay_2.537	264.75	0.310897	0.166239	1.87018	0.0614589	0.091746		Up-regulated	YHL022C
YML127W	Sbay_13.15	932.333	1.06465	0.117058	9.09502	9.45725e-20	1.21399e-18		Up-regulated	YJR078W
YDR404C	Sbay_2.581	622.833	-0.0056846	0.13021	-0.0436571	0.965178	0.97268		Up-regulated	YLR053C
YHR078W	Sbay_15.270	368.917	-0.410511	0.15063	-2.72529	0.00642447	0.0120671		Up-regulated	YJL163C
YGR084C	Sbay_7.366	2466.06	0.130984	0.094614	1.38441	0.166233	0.222073		Up-regulated	YOL104C
YDR286C	Sbay_2.452	220.559	-0.210114	0.174434	-1.20455	0.228377	0.292869		Up-regulated	YNL211C
YFR018C	Sbay_6.89	126.864	-9.4985	1.19977	-7.91693	2.43456e-15	2.19195e-14		Up-regulated	YBL059W
YCR002C	Sbay_3.21	1042	0.118487	0.108956	1.08748	0.276827	0.346518		Up-regulated	YHR177W
YHR141C	Sbay_15.338	11296.6	-0.350581	0.0769374	-4.55671	5.1962e-06	1.66651e-05		Up-regulated	YLR187W
YER042W	Sbay_5.142	886.833	-0.15756	0.139373	-1.13049	0.25827	0.326361		Up-regulated	YML006C
YOR163W	Sbay_8.217	448.026	0.121419	0.143095	0.848515	0.396151	0.472719		Up-regulated	YGR101W
YGL157W	Sbay_7.108	637.297	-1.6254	0.436652	-3.72242	0.000197319	0.000488214		Up-regulated	YLR262C
YNL162W-A	Sbay_14.176	39.1228	0.778829	0.440517	1.76799	0.0770627	0.112372		Up-regulated	YPL026C
YLR233C	Sbay_10.328	116.888	-0.0475896	0.243211	-0.195672	0.844867	0.876121		Up-regulated	YJR150C
YGR099W	Sbay_7.382	209.054	-0.0826636	0.182322	-0.453394	0.650265	0.712352		Up-regulated	YDR036C
YBL015W	Sbay_2.107	1075.67	0.332145	0.147633	2.2498	0.0244617	0.0402726		Up-regulated	YDR338C
YNL067W	Sbay_14.274	8620.42	0.230794	0.0894558	2.57998	0.00988056	0.0178166		Up-regulated	YGL162W
YOL090W	Sbay_15.76	483.5	0.148177	0.155494	0.952947	0.340617	0.414755		Up-regulated	YOR315W
YLR300W	Sbay_10.394	4673.42	0.387119	0.131099	2.95289	0.00314817	0.00628422		Up-regulated	YML043C
YNL145W	Sbay_14.194	19.8112	1.6902	0.567061	2.98063	0.00287659	0.00580918		Up-regulated	YGL057C
YBL003C	Sbay_2.125	3854.25	-0.0357605	0.0912476	-0.391906	0.695128	0.752438		Up-regulated	YLR399C
YJR140C	Sbay_12.233	357.25	-0.0321848	0.148606	-0.216578	0.828538	0.863677		Up-regulated	YMR121C
YOR212W	Sbay_8.265	33.75	-2.43097	0.455363	-5.33853	9.37022e-08	3.85361e-07		Up-regulated	YPL219W
YOR033C	Sbay_8.86	384.819	0.139179	0.147644	0.942664	0.345853	0.419554		Up-regulated	YKR093W
YOR062C	Sbay_8.112	283.557	0.988876	0.22209	4.4526	8.48363e-06	2.6345e-05		Up-regulated	YOR324C
YJR095W	Sbay_12.183	9.83333	-2.64367	0.839302	-3.14984	0.00163359	0.00345505		Up-regulated	YDR449C
YBR191W	Sbay_4.443	10323.9	0.259265	0.0765386	3.38737	0.000705661	0.00159181		Up-regulated	YGL096W
YMR164C	Sbay_13.344	188.951	-0.478565	0.189644	-2.5235	0.0116194	0.0206223		Up-regulated	YJL172W
YBR043C	Sbay_4.275	438.43	0.0876008	0.153743	0.569787	0.568822	0.639062		Up-regulated	YGR213C
YHR005C-A	Sbay_8.60	2678.29	-0.851532	0.0919504	-9.26078	2.02948e-20	2.73374e-19		Up-regulated	YJL088W
YDR380W	Sbay_2.554	254.167	-3.28775	0.466229	-7.05179	1.76632e-12	1.20846e-11		Up-regulated	YLR265C
YGL100W	Sbay_7.166	780.808	-0.287806	0.114964	-2.50345	0.0122988	0.021687		Up-regulated	YOR114W
YBR094W	Sbay_4.341	630.333	0.0479001	0.132491	0.361535	0.7177	0.772358		Up-regulated	YCL037C
YHR112C	Sbay_15.308	294.75	0.314254	0.170515	1.84297	0.0653338	0.0967508		Up-regulated	YBR294W
YNR007C	Sbay_14.360	415.005	0.0622417	0.144971	0.42934	0.667676	0.728181		Up-regulated	YBL071W-A
YDR035W	Sbay_2.193	1671	-0.337017	0.111038	-3.03516	0.00240408	0.00493961		Up-regulated	YLL013C
YGR042W	Sbay_7.327	251	-1.41413	0.175199	-8.07158	6.93934e-16	6.55508e-15		Up-regulated	YPR127W
YPL156C	Sbay_16.154	233.62	-1.50684	0.199945	-7.53626	4.83643e-14	3.8528e-13		Up-regulated	YOR104W
YDR485C	Sbay_2.659	615.298	0.257419	0.133047	1.9348	0.0530152	0.0803674		Up-regulated	YER073W
YGR077C	Sbay_7.359	283.675	8.71245e-05	0.171161	0.000509022	0.999594	0.999787		Up-regulated	YOR287C
YOR216C	Sbay_8.269	620.415	0.146569	0.120467	1.21667	0.223728	0.28769		Up-regulated	YCR072C
YIL044C	Sbay_9.156	610.152	0.87962	0.136119	6.46213	1.03242e-10	5.95564e-10		Up-regulated	YDR528W
YPL239W	Sbay_16.68	696.388	0.0629478	0.129877	0.484673	0.627908	0.691512		Up-regulated	YDR480W
YNL197C	Sbay_14.144	695.871	-0.551337	0.122225	-4.51082	6.45763e-06	2.03954e-05		Up-regulated	YCR043C
YPR183W	Sbay_16.515	1163.17	-1.86679	0.117063	-15.947	2.9913e-57	2.24825e-55		Up-regulated	YJL146W
YLR069C	Sbay_10.153	6214.75	0.204715	0.0807573	2.53495	0.0112465	0.0200083		Up-regulated	YMR018W
YDL073W	Sbay_4.176	317.172	-0.240635	0.159602	-1.50772	0.131627	0.180825		Up-regulated	YHR096C
YDL004W	Sbay_4.249	1456.67	-0.0625227	0.107083	-0.583872	0.559306	0.630557		Up-regulated	YGL088W
YEL017C-A	Sbay_5.65	1072.38	-0.947164	0.115126	-8.22722	1.91604e-16	1.88193e-15		Up-regulated	YDR307W
YNL093W	Sbay_14.247	135.801	-0.0429978	0.254334	-0.16906	0.865749	0.893132		Up-regulated	YKR050W
YCR046C	Sbay_3.85	900.267	-1.32976	0.109895	-12.1002	1.05322e-33	2.98471e-32		Up-regulated	YMR170C
YLR059C	Sbay_10.143	353.127	-1.27911	0.147705	-8.65993	4.72054e-18	5.29886e-17		Up-regulated	YBR093C
YOL001W	Sbay_15.174	202.26	-0.306149	0.190343	-1.60841	0.107746	0.151593		Up-regulated	YNL147W
YDR525W-A	Sbay_2.708	277.25	1.64277	0.172615	9.51694	1.78352e-21	2.62765e-20		Up-regulated	YOR348C
YIL056W	Sbay_9.143	1020.34	-0.291457	0.113716	-2.56303	0.0103762	0.0186198		Up-regulated	YMR317W
YBR054W	Sbay_4.286	491.917	-8.02989	0.501059	-16.0258	8.43387e-58	6.62698e-56		Up-regulated	YMR319C
YDR507C	Sbay_2.687	404.411	-0.849999	0.159691	-5.32275	1.02208e-07	4.19009e-07		Up-regulated	YOR237W
YDR379C-A	Sbay_2.553	203.099	-0.877439	0.187236	-4.68628	2.78218e-06	9.26085e-06		Up-regulated	YMR008C
YOL063C	Sbay_15.102	403.583	-0.390594	0.142708	-2.73701	0.00620008	0.011688		Up-regulated	YFL026W
YPL224C	Sbay_16.82	540.922	-0.0287386	0.131408	-0.218697	0.826886	0.862137		Up-regulated	YDR157W
YLR137W	Sbay_10.230	221.508	-0.633168	0.186705	-3.39128	0.000695679	0.00157094		Up-regulated	YJL056C
YEL007W	Sbay_5.79	1024.84	0.387211	0.116971	3.31031	0.000931935	0.00206011		Up-regulated	YBR254C
YLR020C	Sbay_10.100	371.308	-1.41576	0.150063	-9.43443	3.93124e-21	5.67894e-20		Up-regulated	YGR049W
YNL217W	Sbay_14.125	817.214	-0.286594	0.167346	-1.71258	0.0867902	0.124818		Up-regulated	YEL048C
YKL204W	Sbay_11.19	1076.12	-0.00342308	0.106424	-0.0321645	0.974341	0.9802		Up-regulated	YOR247W
YER067W	Sbay_5.179	7394.67	1.08599	0.271322	4.00258	6.26546e-05	0.000169145		Up-regulated	YLR134W
YDL042C	Sbay_4.210	119.849	0.904217	0.239557	3.77454	0.000160302	0.000404539		Up-regulated	YOR390W
YOR058C	Sbay_8.107	223.844	0.0882707	0.180199	0.489851	0.624239	0.688642		Up-regulated	YDR076W
YPL248C	Sbay_16.59	193.304	1.00319	0.194981	5.14507	2.67415e-07	1.03494e-06		Down-regulated	YLR152C
YDR531W	Sbay_2.713	753.833	1.41588	0.124151	11.4045	3.97082e-30	9.57798e-29		Down-regulated	YLR313C
YIL013C	Sbay_9.192	140.289	-1.56803	0.265372	-5.9088	3.44608e-09	1.69485e-08		Down-regulated	YGL215W
YPL005W	Sbay_16.313	221.917	0.354549	0.199549	1.77675	0.07561	0.110517		Down-regulated	YPL165C
YMR233W	Sbay_13.417	406.784	1.11674	0.150536	7.41843	1.18516e-13	9.06526e-13		Down-regulated	YFR018C
YPL206C	Sbay_16.100	1289.42	1.36504	0.113287	12.0494	1.95269e-33	5.47387e-32		Down-regulated	YGL157W
YOL136C	Sbay_15.24	962.917	1.14991	0.158568	7.25185	4.11111e-13	2.99208e-12		Down-regulated	YOR212W
YDL060W	Sbay_4.189	1106.71	-0.130626	0.105365	-1.23974	0.21507	0.277737		Down-regulated	YJR095W
YLR002C	Sbay_10.79	598.563	0.516668	0.130326	3.96443	7.35701e-05	0.000196364		Down-regulated	YDR380W
YOR303W	Sbay_8.354	1533	2.21422	0.156118	14.183	1.16792e-45	5.60816e-44		Down-regulated	YPL156C
YDR320C-A	Sbay_2.490	188.554	-0.107299	0.190361	-0.563658	0.572987	0.64235		Down-regulated	YPR183W
YDR393W	Sbay_2.570	359.397	-0.0518634	0.145618	-0.356161	0.72172	0.775397		Down-regulated	YBR054W
YBR293W	Sbay_4.553	197.741	1.03307	0.249995	4.13236	3.59061e-05	0.000101001		Down-regulated	YIL013C
YIR022W	Sbay_9.238	726.5	0.612937	0.125994	4.8648	1.14574e-06	4.06974e-06		Down-regulated	YGR019W
YGL084C	Sbay_7.186	672.25	-0.34525	0.116856	-2.95449	0.00313184	0.00625402		Down-regulated	YCR060W
YNR052C	Sbay_14.407	788.645	-0.326187	0.120092	-2.71614	0.00660477	0.0123521		Down-regulated	YOL014W
YJL063C	Sbay_6.140	2591.08	0.042886	0.0937592	0.457406	0.647379	0.709641		Down-regulated	YGL014W
YGR019W	Sbay_7.300	1024	-1.69827	0.111148	-15.2794	1.04938e-52	6.7186e-51		Down-regulated	YMR168C
YGL244W	Sbay_7.17	1151.89	0.243162	0.104594	2.32482	0.0200817	0.0338239		Down-regulated	YMR104C
YHR032W	Sbay_15.218	1045.5	-0.130553	0.118505	-1.10167	0.270605	0.340125		Down-regulated	YOR338W
YEL032W	Sbay_5.37	754.276	1.07585	0.121059	8.88701	6.27772e-19	7.64232e-18		Down-regulated	YDL095W
YOL076W	Sbay_15.90	588.417	0.38617	0.128982	2.99397	0.0027537	0.00558713		Down-regulated	YGL181W
YER145C	Sbay_5.273	2792.98	1.07742	0.124551	8.65048	5.12844e-18	5.73191e-17		Down-regulated	YFR014C
YER110C	Sbay_5.230	1852.17	0.0403474	0.0946272	0.426382	0.669829	0.729929		Down-regulated	YNL128W
YHR123W	Sbay_15.320	238.268	-0.00211772	0.202843	-0.0104402	0.99167	0.994739		Down-regulated	YDR530C
YBL033C	Sbay_2.86	544.158	-0.499841	0.141704	-3.52737	0.000419712	0.000983563		Down-regulated	YLR180W
YDR022C	Sbay_2.172	184.517	-0.0389106	0.177928	-0.218688	0.826893	0.862137		Down-regulated	YLR330W
YPL266W	Sbay_16.39	899.667	-0.518103	0.119688	-4.32877	1.49945e-05	4.51053e-05		Down-regulated	YMR303C
YLR088W	Sbay_10.172	470.417	0.589965	0.137769	4.28226	1.85004e-05	5.47933e-05		Down-regulated	YNR014W
YHR203C	Sbay_15.409	9889.02	-1.12297	0.0779289	-14.4102	4.46519e-47	2.27024e-45		Down-regulated	YOL048C
YOR304W	Sbay_8.355	682.491	0.19871	0.127182	1.56241	0.118192	0.164903		Down-regulated	YMR107W
YLR023C	Sbay_10.104	711.317	1.3669	0.16426	8.32154	8.68309e-17	8.76079e-16		Down-regulated	YGR234W
YMR118C	Sbay_13.297	7.97435	2.20962	0.931337	2.37252	0.0176671	0.0301684		Down-regulated	YDR524C
YML112W	Sbay_13.32	206.519	0.191385	0.178677	1.07112	0.284116	0.354359		Down-regulated	YLR407W
YGL062W	Sbay_7.209	2500.75	0.676968	0.325355	2.08071	0.0374606	0.0590668		Down-regulated	YOR298W
YNL229C	Sbay_14.115	1012.46	0.618581	0.10381	5.95876	2.5416e-09	1.26738e-08		Down-regulated	YMR152W
YER169W	Sbay_5.303	513.868	-0.421111	0.141259	-2.98113	0.00287185	0.00580187		Down-regulated	YGL028C
YNL321W	Sbay_14.19	776.857	0.525098	0.11226	4.67752	2.90363e-06	9.62801e-06		Down-regulated	YCL026C-B
YOR226C	Sbay_8.277	133.167	0.180954	0.247577	0.7309	0.46484	0.541843		Down-regulated	YPL184C
YGL241W	Sbay_7.20	484.441	-0.238249	0.142161	-1.67591	0.0937562	0.13365		Down-regulated	YOR092W
YEL025C	Sbay_5.44	375.034	-0.41386	0.149691	-2.76476	0.00569645	0.0108291		Down-regulated	YDL154W
YLR108C	Sbay_10.198	238.296	1.07431	0.211153	5.08784	3.62162e-07	1.38304e-06		Down-regulated	YKL055C
YLR229C	Sbay_10.324	1522.75	-0.12669	0.0961426	-1.31774	0.187592	0.246604		Down-regulated	YCR018C
YNL186W	Sbay_14.156	1188.48	0.390638	0.121106	3.2256	0.00125707	0.00271294		Down-regulated	YGR201C
YMR040W	Sbay_13.209	269.538	-0.479439	0.164289	-2.91826	0.0035199	0.0069434		Down-regulated	YJR108W
YDR077W	Sbay_2.236	22638.6	-1.22406	0.103362	-11.8424	2.35538e-32	6.39529e-31		Down-regulated	YFR032C
YCL044C	Sbay_3.168	237.974	0.169219	0.169035	1.00109	0.316784	0.389392		Down-regulated	YDR284C
YKR008W	Sbay_11.239	525.004	0.440087	0.134741	3.26617	0.00109012	0.00238236		Down-regulated	YOR242C
YLR017W	Sbay_10.97	723.667	-0.780128	0.128312	-6.07992	1.20244e-09	6.2672e-09		Down-regulated	YER065C
YMR146C	Sbay_13.325	3991.5	-0.290705	0.0933164	-3.11527	0.0018378	0.00384772		Down-regulated	YDR533C
YPR165W	Sbay_16.495	5512	0.0348374	0.0816217	0.426816	0.669514	0.729739		Down-regulated	YIL015W
YPR024W	Sbay_16.351	2439.58	0.619932	0.0900231	6.88636	5.7236e-12	3.71962e-11		Down-regulated	YLR011W
YDR226W	Sbay_2.393	6937.08	0.266946	0.085015	3.13999	0.00168955	0.00356179		Down-regulated	YHR150W
YMR266W	Sbay_13.450	668.713	3.8122	0.161088	23.6653	8.20441e-124	2.65926e-121		Down-regulated	YOR180C
YDR057W	Sbay_2.214	468.657	0.540961	0.133483	4.05265	5.06398e-05	0.000138512		Down-regulated	YOL016C
YKR064W	Sbay_11.299	243.869	-0.350295	0.17323	-2.02213	0.0431627	0.0669984		Down-regulated	YJL052W
YLR097C	Sbay_10.181	405.229	-0.430278	0.160544	-2.68013	0.00735937	0.0136257		Down-regulated	YJL158C
YCR060W	Sbay_3.95	113.5	-1.5771	0.256394	-6.15107	7.69623e-10	4.09781e-09		Down-regulated	YKL197C
YJL036W	Sbay_12.45	834.417	0.465491	0.113034	4.11813	3.81956e-05	0.000106668		Down-regulated	YHL040C
YER041W	Sbay_5.140	190.401	-0.205964	0.186549	-1.10407	0.269561	0.338978		Down-regulated	YBR181C
YER009W	Sbay_5.97	2014.58	-0.253796	0.0937802	-2.70629	0.00680403	0.0126927		Down-regulated	YLR130C
YBR036C	Sbay_4.268	2056.67	0.210626	0.0956069	2.20304	0.0275917	0.0450113		Down-regulated	YIL094C
YLR446W	Sbay_10.564	141.741	0.992283	0.230639	4.30233	1.69013e-05	5.04025e-05		Down-regulated	YNL237W
YDL139C	Sbay_4.105	134.557	0.152693	0.21601	0.70688	0.479641	0.555352		Down-regulated	YPR015C
YDR246W	Sbay_2.412	368.591	-0.913731	0.152756	-5.98164	2.20902e-09	1.11115e-08		Down-regulated	YDR223W
YOL014W	Sbay_15.157	2971.79	-2.5774	0.154591	-16.6724	2.08008e-62	1.73988e-60		Down-regulated	YAL060W
YOR288C	Sbay_8.336	322.082	0.32349	0.162067	1.99603	0.0459311	0.0707661		Down-regulated	YIR036C
YLR163C	Sbay_10.260	2210.92	-0.379425	0.100519	-3.77465	0.00016023	0.000404539		Down-regulated	YKL096W
YCR028C	Sbay_3.61	460.95	0.397417	0.140612	2.82635	0.00470825	0.00909046		Down-regulated	YDR089W
YNL190W	Sbay_14.151	2568.56	0.496336	0.0893184	5.55693	2.74568e-08	1.20568e-07		Down-regulated	YJR015W
YLR115W	Sbay_10.206	737.043	0.668015	0.116881	5.71535	1.09478e-08	5.07374e-08		Down-regulated	YOL122C
YNL288W	Sbay_14.51	788.147	-0.883434	0.11854	-7.45264	9.14922e-14	7.09235e-13		Down-regulated	YGL208W
YML054C	Sbay_13.105	1144.5	-0.611784	0.116533	-5.24987	1.52207e-07	6.09597e-07		Down-regulated	YBR284W
YHR089C	Sbay_15.283	2774.61	0.174558	0.0936635	1.86368	0.0623672	0.093022		Down-regulated	YKL032C
YGL014W	Sbay_7.265	558.716	-1.71647	0.138372	-12.4047	2.46297e-35	7.78839e-34		Down-regulated	YDR523C
YMR168C	Sbay_13.348	167.75	-2.39822	0.27807	-8.62451	6.43657e-18	7.10214e-17		Down-regulated	YFR016C
YIL124W	Sbay_9.67	1282.38	-0.0393079	0.0998988	-0.393478	0.693967	0.751495		Down-regulated	YDR132C
YPL200W	Sbay_16.107	0.496868	-0.911722	4.39665	-0.207368	0.835723	0.869886		Down-regulated	YLR179C
YLL035W	Sbay_10.37	156.643	-0.116695	0.236094	-0.494273	0.621113	0.686215		Down-regulated	YCL048W
YMR279C	Sbay_13.467	3.50094	1.59705	1.31823	1.21151	0.225702	0.289797		Down-regulated	YDR222W
YMR258C	Sbay_13.442	572.5	0.173707	0.127436	1.36309	0.172855	0.22944		Down-regulated	YPL183C
YCR006C	Sbay_3.26	29.1702	-0.583114	0.466264	-1.25061	0.211078	0.27332		Down-regulated	YOR230W
YER007W	Sbay_5.94	88.7865	-0.80561	0.264695	-3.04354	0.00233809	0.00481929		Down-regulated	YPL149W
YGL114W	Sbay_7.154	575.167	-0.190221	0.126643	-1.50202	0.133091	0.182547		Down-regulated	YGL126W
YER027C	Sbay_5.123	765.295	-0.275737	0.12157	-2.26814	0.0233209	0.038652		Down-regulated	YBR201C-A
YER167W	Sbay_5.301	793.417	0.371084	0.118842	3.12249	0.00179327	0.00376209		Down-regulated	YLR453C
YDL013W	Sbay_4.236	352.327	-1.11987	0.154705	-7.23874	4.5286e-13	3.28466e-12		Down-regulated	YFR017C
YBL106C	Sbay_2.10	319.167	-0.555619	0.154253	-3.602	0.000315779	0.000753974		Down-regulated	YML108W
YMR104C	Sbay_13.281	790.291	-1.76421	0.173796	-10.151	3.27834e-24	5.96542e-23		Down-regulated	YHR157W
YGL044C	Sbay_7.231	464.679	-0.213567	0.140921	-1.51551	0.129643	0.178621		Down-regulated	YOR273C
YGL169W	Sbay_7.95	408.5	-0.461724	0.139947	-3.29927	0.000969362	0.0021392		Down-regulated	YHR137W
YER107C	Sbay_5.228	568.25	-0.911109	0.131709	-6.91762	4.59302e-12	3.01512e-11		Down-regulated	YEL040W
YNR044W	Sbay_14.399	119.094	-0.143625	0.22463	-0.639385	0.522572	0.595618		Down-regulated	YKL001C
YDL195W	Sbay_4.53	3523.95	0.273847	0.0921137	2.97293	0.00294975	0.00593613		Down-regulated	YDR391C
YBR038W	Sbay_4.270	702.669	0.607989	0.115779	5.25127	1.51052e-07	6.05844e-07		Down-regulated	YFR015C
YLR219W	Sbay_10.313	703.228	0.266606	0.157623	1.69141	0.0907582	0.129769		Down-regulated	YER011W
YDR117C	Sbay_2.276	541.583	0.633233	0.129498	4.88989	1.00892e-06	3.62848e-06		Down-regulated	YDR318W
YLR120C	Sbay_10.211	3522.86	0.718605	0.1163	6.17891	6.45462e-10	3.47598e-09		Down-regulated	YJL106W
YCR026C	Sbay_3.58	412.164	-0.764938	0.137794	-5.55133	2.83506e-08	1.24073e-07		Down-regulated	YPL095C
YBL052C	Sbay_2.64	213.584	-0.082339	0.192529	-0.427671	0.66889	0.729213		Down-regulated	YEL023C
YBR060C	Sbay_4.298	324.163	-0.173649	0.166342	-1.04393	0.296519	0.368059		Down-regulated	YDR033W
YPL202C	Sbay_16.105	313.484	-0.523184	0.169775	-3.08164	0.00205865	0.00428589		Down-regulated	YOL110W
YEL047C	Sbay_5.23	714.309	0.787874	0.13539	5.81927	5.91041e-09	2.82762e-08		Down-regulated	YHL025W
YPR036W	Sbay_16.366	4523.92	-0.0956231	0.0845258	-1.13129	0.257934	0.326016		Down-regulated	YPR081C
YBR076W	Sbay_4.314	2.33169	1.40549	2.01449	0.697691	0.485371	0.560733		Down-regulated	YHL028W
YNL317W	Sbay_14.22	313.343	-0.886503	0.152519	-5.81242	6.15771e-09	2.94051e-08		Down-regulated	YER056C
YCR087C-A	Sbay_3.123	273.805	-1.41107	0.176088	-8.0134	1.11577e-15	1.02961e-14		Down-regulated	YDL124W
YGR235C	Sbay_7.527	778.5	0.231372	0.114569	2.0195	0.0434355	0.0673816		Down-regulated	YNR017W
YDR068W	Sbay_2.227	717.15	-0.0430646	0.131253	-0.328104	0.742833	0.792334		Down-regulated	YFR034W-A
YDL055C	Sbay_4.194	12965.2	0.646324	0.116822	5.53256	3.15599e-08	1.37192e-07		Down-regulated	YIL074C
YPR176C	Sbay_16.509	486.417	-0.265215	0.127756	-2.07596	0.0378978	0.0596473		Down-regulated	YOR096W
YDR177W	Sbay_2.343	1900.75	0.267864	0.10148	2.63957	0.00830122	0.0151745		Down-regulated	YHL024W
YCL001W-A	Sbay_3.18	13.4129	3.36816	0.94053	3.58113	0.000342109	0.000813097		Down-regulated	YMR090W
YJL003W	Sbay_12.78	351	1.18552	0.147327	8.04685	8.49528e-16	7.93811e-15		Down-regulated	YPL221W
YML072C	Sbay_13.83	3269.87	0.853785	0.0916274	9.31801	1.18543e-20	1.63068e-19		Down-regulated	YIL158W
YHR052W	Sbay_15.243	1452.08	0.365987	0.0993419	3.68412	0.000229497	0.000560609		Down-regulated	YGR066C
YDR142C	Sbay_2.303	183.205	-0.392305	0.203714	-1.92576	0.0541339	0.0819058		Down-regulated	YGR150C
YPL249C-A	Sbay_16.57	12273.1	-0.136956	0.0847862	-1.61531	0.106243	0.149763		Down-regulated	YJL133C-A
YKR026C	Sbay_11.258	729	0.348314	0.131773	2.64329	0.00821057	0.0150406		Down-regulated	YOR344C
YFL044C	Sbay_6.9	446.713	-0.261536	0.149457	-1.74991	0.0801341	0.116212		Down-regulated	YDR497C
YJR043C	Sbay_12.125	218.021	-0.904309	0.202922	-4.45644	8.33309e-06	2.59085e-05		Down-regulated	YMR270C
YPL263C	Sbay_16.42	851.664	0.0233175	0.110034	0.211912	0.832176	0.866773		Down-regulated	YOR339C
YJR012C	Sbay_12.97	128.534	0.978084	0.223777	4.3708	1.23791e-05	3.76528e-05		Down-regulated	YLR054C
YJL130C	Sbay_6.210	3180.33	0.457312	0.0905003	5.05316	4.34566e-07	1.64022e-06		Down-regulated	YHR033W
YPL078C	Sbay_16.234	2443.42	-0.363966	0.0928308	-3.92074	8.82771e-05	0.000232743		Down-regulated	YBR253W
YJR126C	Sbay_12.217	946.809	-0.275374	0.130226	-2.11459	0.0344646	0.0548262		Down-regulated	YIL111W
YKL060C	Sbay_11.166	142797	0.204116	0.08349	2.4448	0.0144932	0.0251377		Down-regulated	YOR052C
YBL085W	Sbay_2.33	974.957	-0.770232	0.121882	-6.3195	2.62416e-10	1.4649e-09		Down-regulated	YOL015W
YKL173W	Sbay_11.50	862.328	0.480688	0.128233	3.74856	0.000177854	0.000444936		Down-regulated	YPR147C
YIR023W	Sbay_9.239	331.814	0.0828348	0.154547	0.535986	0.591968	0.660488		Down-regulated	YAL015C
YGR200C	Sbay_7.494	845.381	0.31924	0.118442	2.69533	0.00703196	0.0130662		Down-regulated	YLR273C
YCR044C	Sbay_3.83	567.233	0.72191	0.12506	5.77251	7.80982e-09	3.67529e-08		Down-regulated	YFR034C
YLR383W	Sbay_10.500	335.992	0.0224912	0.153041	0.146962	0.883162	0.907845		Down-regulated	YGL251C
YDL177C	Sbay_4.70	94.4634	0.297978	0.2518	1.18339	0.236655	0.302289		Down-regulated	YIL073C
YIL127C	Sbay_9.64	456.167	0.711748	0.149119	4.77302	1.81484e-06	6.25235e-06		Down-regulated	YGR286C
YDR491C	Sbay_2.667	0.535709	-1.66563	3.62934	-0.458935	0.646281	0.708736		Down-regulated	YOR100C
YDR082W	Sbay_2.242	202.748	-0.127032	0.195111	-0.651072	0.515	0.588409		Down-regulated	YLR164W
YOR338W	Sbay_8.388	274.141	-1.54442	0.165216	-9.3479	8.94084e-21	1.24309e-19		Down-regulated	YNL206C
YDR348C	Sbay_2.519	863.796	0.203095	0.124214	1.63504	0.10204	0.144348		Down-regulated	YIR006C
YER044C-A	Sbay_5.145	9.68355	0.519313	0.759159	0.684063	0.493935	0.568727		Down-regulated	YGR169C
YKL182W	Sbay_11.42	5885.08	-0.282205	0.0825032	-3.42053	0.000624985	0.00142282		Down-regulated	YIL072W
YOR291W	Sbay_8.340	781.167	0.0481398	0.116929	0.411701	0.680558	0.739911		Down-regulated	YIL112W
YDR469W	Sbay_2.644	201.667	0.0338542	0.188479	0.179618	0.857453	0.886336		Down-regulated	YJR107W
YMR079W	Sbay_13.258	1603	0.414875	0.108686	3.81718	0.000134984	0.000345351		Down-regulated	YPR063C
YDR333C	Sbay_2.503	743.978	0.444318	0.127278	3.49093	0.000481345	0.0011144		Down-regulated	YGR124W
YKL018C-A	Sbay_11.209	194.667	-0.0191353	0.207043	-0.0924221	0.926363	0.940165		Down-regulated	YPL130W
YKL051W	Sbay_11.175	1160.17	0.224095	0.126022	1.77822	0.0753682	0.110226		Down-regulated	YCR021C
YMR013C	Sbay_13.177	116	-0.154583	0.256127	-0.60354	0.546149	0.618548		Down-regulated	YDR038C
YPL167C	Sbay_16.143	372.35	2.10926	0.163965	12.8641	7.16865e-38	2.47844e-36		Down-regulated	YDR495C
YLR223C	Sbay_10.317	444.187	-0.395034	0.151759	-2.60304	0.0092402	0.0167551		Down-regulated	YEL054C
YIR012W	Sbay_9.223	1206.42	0.23021	0.103686	2.22026	0.0264013	0.0432125		Down-regulated	YGR225W
YLR363C	Sbay_10.465	220.583	0.596709	0.185489	3.21695	0.00129561	0.00278798		Down-regulated	YNL080C
YFL020C	Sbay_6.39	15.8634	1.47922	0.605833	2.44162	0.0146214	0.0253431		Down-regulated	YOR231W
YNR046W	Sbay_14.401	321.417	-0.472394	0.15061	-3.13654	0.00170955	0.00359957		Down-regulated	YGR168C
YNL328C	Sbay_14.13	47.5	0.240036	0.347237	0.691275	0.489393	0.564625		Down-regulated	YGR203W
YJL179W	Sbay_6.260	439.417	0.145159	0.138327	1.04939	0.294	0.365445		Down-regulated	YGR153W
YJL014W	Sbay_12.63	2466.7	-0.169043	0.0883422	-1.9135	0.0556844	0.0839474		Down-regulated	YPR075C
YDR219C	Sbay_2.387	422.713	-0.136615	0.139454	-0.979642	0.327263	0.400468		Down-regulated	YDR039C
YCR011C	Sbay_3.37	1058.33	-0.27723	0.111513	-2.48608	0.0129161	0.0226522		Down-regulated	YDR026C
YLR431C	Sbay_10.547	282.626	0.431266	0.182254	2.36629	0.0179673	0.0306106		Down-regulated	YER045C
YKR046C	Sbay_11.281	2552.97	-0.100054	0.0922908	-1.08412	0.278312	0.34821		Down-regulated	YBL056W
YJR036C	Sbay_12.119	150.873	-0.0887733	0.206798	-0.429275	0.667723	0.728181		Down-regulated	YLL015W
YJR005W	Sbay_12.88	746.917	-0.161682	0.113432	-1.42536	0.154054	0.207674		Down-regulated	YER103W
YGR217W	Sbay_7.511	264.955	0.884083	0.164659	5.36917	7.91001e-08	3.28171e-07		Down-regulated	YDR273W
YKL183W	Sbay_11.41	444.679	0.388328	0.131141	2.96115	0.00306493	0.00613459		Down-regulated	YIR016W
YBL098W	Sbay_2.20	387.891	0.858718	0.150646	5.70023	1.19644e-08	5.50556e-08		Down-regulated	YCL049C
YDL095W	Sbay_4.151	940.973	-2.9793	0.162783	-18.3022	7.9407e-75	1.0044e-72		Down-regulated	YLR227C
YGR216C	Sbay_7.510	268.5	0.672009	0.179776	3.73805	0.000185456	0.000461516		Down-regulated	YGR254W
YOR174W	Sbay_8.227	399.137	-0.743315	0.149343	-4.97722	6.45034e-07	2.37582e-06		Down-regulated	YJR145C
YER030W	Sbay_5.127	683.976	-0.993545	0.131315	-7.56611	3.8456e-14	3.08719e-13		Down-regulated	YOL108C
YFL002C	Sbay_6.59	513.25	-1.06162	0.169326	-6.26972	3.61687e-10	1.99969e-09		Down-regulated	YMR318C
YDR155C	Sbay_2.317	13038.4	1.55769	0.0904518	17.2212	1.84024e-66	1.83528e-64		Down-regulated	YNL270C
YPR149W	Sbay_16.478	4977.13	-0.295505	0.106219	-2.78203	0.00540199	0.0103299		Down-regulated	YHR020W
YGL181W	Sbay_7.81	725.775	-1.56425	0.118137	-13.241	5.088e-40	1.91205e-38		Down-regulated	YML100W
YJL176C	Sbay_6.257	696.524	1.04827	0.120034	8.73314	2.4769e-18	2.85449e-17		Down-regulated	YER028C
YJR072C	Sbay_12.162	930.381	0.0213756	0.116747	0.183094	0.854724	0.884003		Down-regulated	YHR044C
YDR047W	Sbay_2.204	2143.01	-0.691698	0.0974788	-7.09588	1.28533e-12	8.92334e-12		Down-regulated	YPR120C
YKR039W	Sbay_11.273	172.677	2.30721	0.256288	9.00243	2.20774e-19	2.75887e-18		Down-regulated	YMR097C
YPL087W	Sbay_16.225	1628.33	0.121508	0.0983888	1.23497	0.21684	0.279734		Down-regulated	YER060W
YNL015W	Sbay_14.332	3682.25	1.5634	0.100239	15.5967	7.66511e-55	5.30017e-53		Down-regulated	YGR241C
YCR084C	Sbay_3.121	1791.58	-1.19457	0.0974729	-12.2554	1.57185e-34	4.71193e-33		Down-regulated	YBR071W
YDR302W	Sbay_2.468	286.25	0.535598	0.177021	3.02561	0.00248129	0.00508816		Down-regulated	YER053C-A
YGL003C	Sbay_7.279	326.083	-1.27204	0.165561	-7.68319	1.55171e-14	1.28549e-13		Down-regulated	YFR025C
YJL054W	Sbay_6.130	1521.91	-0.204862	0.0947439	-2.16227	0.0305971	0.0493193		Down-regulated	YJR151C
YHR178W	Sbay_15.378	265.595	0.372173	0.182821	2.03572	0.0417783	0.0651419		Down-regulated	YMR182C
YLR205C	Sbay_10.299	2639.76	2.00347	0.152643	13.1252	2.36168e-39	8.62513e-38		Down-regulated	YGL255W
YDR268W	Sbay_2.436	653.417	1.44551	0.134757	10.7268	7.6199e-27	1.59342e-25		Down-regulated	YFR007W
YGL192W	Sbay_7.72	313.564	0.103417	0.151562	0.682343	0.495022	0.569726		Down-regulated	YDR288W
YPL170W	Sbay_16.140	428.083	-0.269237	0.153841	-1.7501	0.0801007	0.116196		Down-regulated	YOR320C
YOL003C	Sbay_15.172	274.498	0.238566	0.156459	1.52479	0.127313	0.175971		Down-regulated	YBR092C
YML094W	Sbay_13.54	432.756	0.168037	0.154055	1.09076	0.275377	0.345203		Down-regulated	YOR107W
YKR006C	Sbay_11.237	2252.05	0.914244	0.100166	9.12729	7.02372e-20	9.08354e-19		Down-regulated	YLR402W
YDL117W	Sbay_4.129	567.742	-0.126075	0.128629	-0.980142	0.327016	0.400342		Down-regulated	YIL011W
YMR131C	Sbay_13.311	1535.94	0.128164	0.11755	1.0903	0.275581	0.345376		Down-regulated	YOR010C
YJL081C	Sbay_6.154	974.417	0.147031	0.112315	1.3091	0.1905	0.24973		Down-regulated	YLL039C
YDR204W	Sbay_2.371	696.917	0.230602	0.114508	2.01386	0.0440247	0.0681123		Down-regulated	YLR411W
YBR085C-A	Sbay_4.332	2491.81	-0.282546	0.107393	-2.63096	0.00851448	0.0155534		Down-regulated	YKR075C
YDR251W	Sbay_2.417	1495.73	-0.00996678	0.10165	-0.09805	0.921893	0.936887		Down-regulated	YPL034W
YJR054W	Sbay_12.139	204.767	1.36792	0.231272	5.91478	3.3231e-09	1.63817e-08		Down-regulated	YLR035C
YPL269W	Sbay_16.36	103.776	-0.633841	0.257337	-2.46308	0.0137748	0.0240526		Down-regulated	YGR268C
YMR293C	Sbay_13.483	551.166	0.278605	0.125541	2.21923	0.026471	0.0433055		Down-regulated	YJL118W
YER089C	Sbay_5.204	962.893	-0.700807	0.134467	-5.21176	1.87062e-07	7.40539e-07		Down-regulated	YLR310C
YAL038W	Sbay_1.27	77338.2	0.131616	0.0776617	1.69473	0.0901266	0.128937		Down-regulated	YKL209C
YIL105C	Sbay_9.90	662.173	-0.0485598	0.127203	-0.381751	0.702646	0.758992		Down-regulated	YNL209W
YNL137C	Sbay_14.201	3867.25	0.289234	0.0835513	3.46175	0.000536669	0.00123367		Down-regulated	YNL294C
YNL119W	Sbay_14.220	384.98	0.50516	0.165607	3.05036	0.00228567	0.00472439		Down-regulated	YER104W
YNR006W	Sbay_14.358	631.846	-0.267783	0.122788	-2.18086	0.0291935	0.0473709		Down-regulated	YDL130W-A
YML126C	Sbay_13.17	4469.25	0.0374232	0.0913005	0.40989	0.681887	0.7412		Down-regulated	YBL043W
YAL047C	Sbay_1.17	251.598	0.974928	0.177028	5.50719	3.64606e-08	1.57308e-07		Down-regulated	YDL182W
YIL150C	Sbay_9.38	160.884	0.81929	0.212017	3.86427	0.000111422	0.000289495		Down-regulated	YMR130W
YJL208C	Sbay_6.287	760.988	-0.493236	0.116641	-4.22868	2.35065e-05	6.82175e-05		Down-regulated	YOR009W
YDR285W	Sbay_2.451	192.058	-0.903889	0.198774	-4.54731	5.43359e-06	1.73835e-05		Down-regulated	YCR067C
YNL064C	Sbay_14.277	3264.33	-0.0447076	0.104045	-0.429695	0.667417	0.728181		Down-regulated	YHR086W
YGR158C	Sbay_7.449	443.52	-0.811409	0.134435	-6.03569	1.58284e-09	8.11932e-09
YKL077W	Sbay_11.147	1666.67	0.261949	0.0998561	2.62326	0.00870916	0.0158811
YFR046C	Sbay_12.11	163.809	0.0326293	0.196563	0.165999	0.868157	0.894727
YBR212W	Sbay_4.470	967.152	-0.242077	0.10454	-2.31563	0.0205782	0.0346191
YJR109C	Sbay_12.200	510.417	0.937656	0.154509	6.06864	1.29001e-09	6.69e-09
YKL025C	Sbay_11.201	526.478	0.0582706	0.126448	0.460828	0.644922	0.707845
YLR254C	Sbay_10.350	202.275	-0.94718	0.189724	-4.99242	5.96275e-07	2.2072e-06
YFR014C	Sbay_6.78	933.973	-2.57603	0.146119	-17.6297	1.45821e-69	1.54332e-67
YBR158W	Sbay_4.409	563.21	1.38144	0.144306	9.57299	1.03858e-21	1.56572e-20
YPL150W	Sbay_16.160	433.428	-0.44878	0.143569	-3.12589	0.00177271	0.00372347
YPL105C	Sbay_16.207	1463.17	-0.173976	0.104283	-1.6683	0.0952554	0.135564
YLR392C	Sbay_10.509	436.5	0.997317	0.180564	5.52335	3.32592e-08	1.43975e-07
YOL097C	Sbay_15.68	2221.94	-0.0368317	0.0985914	-0.373579	0.708717	0.764277
YOR110W	Sbay_8.163	394.547	-0.207335	0.1421	-1.45908	0.144544	0.19618
YJL096W	Sbay_6.170	1558.99	-0.395869	0.103688	-3.8179	0.000134593	0.000344521
YJR141W	Sbay_12.234	231.753	-0.267673	0.173381	-1.54384	0.122627	0.170266
YDR407C	Sbay_2.584	452.428	-0.138265	0.138269	-0.999968	0.317326	0.389688
YLR354C	Sbay_10.455	12310.4	-0.222286	0.120415	-1.846	0.0648922	0.0961517
YGR110W	Sbay_7.395	153.562	-0.339758	0.220119	-1.54352	0.122705	0.170329
YIL065C	Sbay_9.136	557.167	0.491823	0.151532	3.24568	0.00117171	0.00254246
YKL029C	Sbay_11.195	1677.58	0.297979	0.0972104	3.0653	0.00217448	0.00451075
YBR258C	Sbay_4.520	141.917	-0.810132	0.210214	-3.85384	0.000116278	0.000301058
YLR457C	Sbay_10.578	108	-0.869623	0.264403	-3.289	0.00100543	0.00220752
YLR301W	Sbay_10.395	1803.4	0.872547	0.099299	8.78707	1.53513e-18	1.80117e-17
YNL146W	Sbay_14.193	27.0833	1.24993	0.509739	2.45209	0.0142029	0.0246672
YAL007C	Sbay_1.61	739.75	-0.262925	0.124336	-2.11463	0.0344611	0.0548262
YJL070C	Sbay_6.145	320.597	-0.963319	0.15909	-6.05518	1.40259e-09	7.23047e-09
YHR142W	Sbay_15.339	334.917	-0.981414	0.151798	-6.46525	1.01133e-10	5.84699e-10
YGR098C	Sbay_7.381	167.572	-0.688326	0.208249	-3.30531	0.000948708	0.0020954
YBR223C	Sbay_4.480	239.459	-1.08881	0.183179	-5.944	2.78156e-09	1.38256e-08
YOR103C	Sbay_8.156	258.2	0.0969641	0.178721	0.542544	0.587444	0.655863
YGL154C	Sbay_7.111	134.466	0.584681	0.229537	2.54722	0.0108584	0.019391
YNL075W	Sbay_14.264	469.167	-0.213174	0.137791	-1.54708	0.121844	0.169269
YJL154C	Sbay_6.232	1292	0.272385	0.105787	2.57484	0.0100285	0.0180457
YDR091C	Sbay_2.252	1638.67	0.0574127	0.108804	0.527669	0.597729	0.665484
YJL123C	Sbay_6.202	1663.07	-0.30195	0.105375	-2.86547	0.00416389	0.0081333
YPL159C	Sbay_16.151	536.417	-0.069498	0.140232	-0.495594	0.620181	0.685477
YHR066W	Sbay_15.255	570.639	0.444087	0.160781	2.76207	0.00574367	0.0109109
YJL203W	Sbay_6.282	212.5	-0.177818	0.186541	-0.953239	0.340469	0.414672
YAL009W	Sbay_1.59	266.333	0.731094	0.162744	4.4923	7.04582e-06	2.21452e-05
YIL147C	Sbay_9.41	565.89	0.219192	0.125907	1.7409	0.0817008	0.118253
YPL244C	Sbay_16.63	523.583	0.848742	0.137479	6.17362	6.67438e-10	3.58316e-09
YBR129C	Sbay_4.377	278.706	0.185574	0.167417	1.10845	0.267666	0.336922
YDL160C	Sbay_4.86	442.113	-1.27567	0.137329	-9.28919	1.55465e-20	2.12168e-19
YBR176W	Sbay_4.428	312.167	-0.0494006	0.171443	-0.288146	0.773235	0.816035
YLR183C	Sbay_10.280	494.982	-0.285779	0.149985	-1.90538	0.0567308	0.0853265
YPL173W	Sbay_16.137	2041.1	-0.32211	0.10751	-2.99608	0.00273475	0.0055552
YDL215C	Sbay_4.32	1392.5	0.664698	0.289342	2.29727	0.0216033	0.0361169
YGR167W	Sbay_7.459	2709.78	0.440627	0.101038	4.36098	1.29479e-05	3.93366e-05
YPR065W	Sbay_16.393	825.892	1.34379	0.157417	8.53651	1.38336e-17	1.48532e-16
YJL059W	Sbay_6.135	128.767	0.0857735	0.21447	0.399933	0.689206	0.747902
YKL099C	Sbay_11.125	540.917	0.79852	0.130711	6.10906	1.00222e-09	5.28741e-09
YPL097W	Sbay_16.214	1308.26	0.288373	0.0996919	2.89265	0.00382009	0.00749849
YDR315C	Sbay_2.483	124.919	0.562267	0.227046	2.47644	0.0132699	0.0232022
YJL143W	Sbay_6.223	2018.75	-0.87267	0.0989758	-8.817	1.17565e-18	1.40806e-17
YBR161W	Sbay_4.412	404.905	1.71334	0.162485	10.5446	5.37814e-26	1.08949e-24
YGL238W	Sbay_7.22	904.833	-0.244793	0.126072	-1.94169	0.0521742	0.0793244
YDL239C	Sbay_4.5	141.443	1.49498	0.230443	6.48742	8.73161e-11	5.10509e-10
YML081C-A	Sbay_13.69	1073.75	0.046091	0.117039	0.393811	0.693721	0.751495
YNL128W	Sbay_14.211	16.3087	-2.22719	0.646088	-3.4472	0.000566433	0.00129635
YIL118W	Sbay_9.76	525.583	0.548795	0.131404	4.1764	2.96153e-05	8.47599e-05
YDR450W	Sbay_2.625	13271.9	-0.18906	0.079498	-2.37817	0.0173988	0.0297495
YNL151C	Sbay_14.188	400.647	-0.76779	0.168842	-4.54738	5.43178e-06	1.73835e-05
YPL190C	Sbay_16.116	1483.21	0.0980884	0.105694	0.92804	0.353387	0.427493
YKL191W	Sbay_11.32	472.356	-1.35955	0.140663	-9.66532	4.23307e-22	6.53354e-21
YLR220W	Sbay_10.314	755.917	0.516378	0.116831	4.41987	9.8761e-06	3.03781e-05
YHR006W	Sbay_8.62	474.983	0.47923	0.135689	3.53181	0.000412721	0.000968494
YPL201C	Sbay_16.106	29.4107	0.710697	0.537387	1.3225	0.186	0.244841
YHR120W	Sbay_15.317	281.271	-0.293018	0.164669	-1.77944	0.0751684	0.110026
YMR232W	Sbay_13.416	44.5	-0.31996	0.402868	-0.794206	0.427075	0.503939
YGR106C	Sbay_7.389	1955.92	0.226955	0.100517	2.25789	0.0239527	0.0394962
YMR180C	Sbay_13.361	155.359	-1.38017	0.208078	-6.63295	3.29036e-11	2.0075e-10
YKL021C	Sbay_11.205	853.975	0.463502	0.114728	4.04001	5.34497e-05	0.000145583
YHR025W	Sbay_15.211	1575.58	-0.323986	0.0975129	-3.32249	0.000892181	0.00198067
YNL083W	Sbay_14.256	571.089	-0.686939	0.123319	-5.57044	2.54099e-08	1.12054e-07
YOR328W	Sbay_8.379	225.58	0.00119045	0.195848	0.00607843	0.99515	0.997247
YNL258C	Sbay_14.84	420.565	-0.342947	0.136185	-2.51824	0.0117942	0.0208825
YOR098C	Sbay_8.152	711.754	-0.85059	0.126506	-6.7237	1.77161e-11	1.10163e-10
YIL026C	Sbay_9.173	308.019	0.337292	0.160261	2.10464	0.0353226	0.0559337
YOL137W	Sbay_15.23	342.056	1.37772	0.161003	8.55712	1.15724e-17	1.25291e-16
YLR410W	Sbay_10.526	1400.42	0.432687	0.109481	3.95218	7.7443e-05	0.000205642
YDR530C	Sbay_2.712	317.5	-1.51197	0.170801	-8.85221	8.58025e-19	1.03482e-17
YDR131C	Sbay_2.294	104.813	-0.624601	0.24274	-2.57312	0.0100786	0.0181296
YER111C	Sbay_5.232	197.714	-0.741354	0.194098	-3.81949	0.000133728	0.000342477
YEL031W	Sbay_5.38	1972.25	0.0695853	0.109728	0.634163	0.525975	0.598837
YOL071W	Sbay_15.94	721.402	0.0106326	0.113526	0.093658	0.925381	0.939719
YER147C	Sbay_5.275	206.462	-0.554514	0.184651	-3.00304	0.00267299	0.00544681
YDL063C	Sbay_4.187	569.303	0.577647	0.133238	4.33546	1.45455e-05	4.3882e-05
YER144C	Sbay_5.272	664.777	-0.755078	0.131439	-5.7447	9.20847e-09	4.31392e-08
YNL163C	Sbay_14.175	915.25	-0.444913	0.111457	-3.99178	6.55786e-05	0.000176213
YGR185C	Sbay_7.478	2529.33	0.0723744	0.103365	0.700185	0.483812	0.559057
YJL189W	Sbay_6.269	8475.06	-0.019084	0.0871343	-0.219018	0.826636	0.862137
YMR238W	Sbay_13.422	1037	0.586939	0.109598	5.35536	8.53839e-08	3.52549e-07
YER168C	Sbay_5.302	506.75	0.0144982	0.139528	0.103908	0.917242	0.933808
YPL265W	Sbay_16.40	870.582	0.0422613	0.174201	0.242601	0.808314	0.846681
YIL083C	Sbay_9.116	513.073	0.311184	0.136492	2.27986	0.0226158	0.0376519
YOR081C	Sbay_8.130	254.696	-0.427285	0.170756	-2.50231	0.0123386	0.0217425
YEL026W	Sbay_5.43	1033.33	-0.0040321	0.111452	-0.0361779	0.971141	0.97736
YLL050C	Sbay_10.21	4530.11	0.576851	0.104136	5.53938	3.03553e-08	1.32177e-07
YDR392W	Sbay_2.569	479.483	-0.631283	0.138452	-4.55958	5.1257e-06	1.64696e-05
YBR290W	Sbay_4.550	777.676	0.149887	0.111027	1.35001	0.177014	0.234242
YLR180W	Sbay_10.277	5577.33	-1.68758	0.127238	-13.2632	3.78636e-40	1.43329e-38
YNL274C	Sbay_14.68	2348.17	0.17456	0.109374	1.59599	0.110491	0.155118
YIL096C	Sbay_9.102	199.667	0.389083	0.214302	1.81558	0.0694348	0.10224
YML113W	Sbay_13.31	125.323	-0.638939	0.235179	-2.71682	0.00659116	0.0123444
YDR021W	Sbay_2.171	147.917	0.308755	0.228696	1.35007	0.176994	0.234242
YGL063W	Sbay_7.206	98.5348	-1.3855	0.29034	-4.77199	1.82412e-06	6.2773e-06
YPL212C	Sbay_16.94	889.651	0.114343	0.130564	0.875764	0.381158	0.45746
YMR005W	Sbay_13.168	800.993	-0.738898	0.130914	-5.64417	1.65985e-08	7.48519e-08
YMR296C	Sbay_13.486	1576.16	0.024108	0.112624	0.214058	0.830502	0.865204
YIL018W	Sbay_9.182	21885.1	-0.683071	0.0750107	-9.1063	8.52366e-20	1.09687e-18
YHR136C	Sbay_15.333	25.5015	1.08946	0.501521	2.17232	0.0298315	0.0482853
YGL173C	Sbay_7.90	2627.3	0.267993	0.0873487	3.06808	0.00215438	0.00447262
YLR330W	Sbay_10.426	1514.44	-1.67735	0.117744	-14.2457	4.76904e-46	2.31142e-44
YMR188C	Sbay_13.369	3119.08	-1.01395	0.108747	-9.32392	1.12117e-20	1.5505e-19
YGL149W	Sbay_7.115	1.48852	-3.12314	2.10762	-1.48183	0.138386	0.188877
YPR095C	Sbay_16.422	354.148	0.591407	0.150757	3.92291	8.74846e-05	0.000230771
YOR310C	Sbay_8.361	4445.98	0.34516	0.0983099	3.51093	0.000446534	0.00104124
YFR051C	Sbay_12.6	1833.83	0.183543	0.123224	1.48951	0.136353	0.186577
YHR024C	Sbay_15.210	1720.83	-0.450335	0.0964665	-4.6683	3.03704e-06	1.00319e-05
YOL131W	Sbay_15.28	1.74812	0.360395	1.83326	0.196587	0.844151	0.876033
YDR188W	Sbay_2.357	2561.31	-0.148616	0.0874083	-1.70025	0.0890843	0.127834
YAL027W	Sbay_1.39	193.083	-1.11177	0.213227	-5.21404	1.8477e-07	7.33702e-07
YMR194W	Sbay_13.375	3775.04	1.32677	0.0831507	15.9562	2.58134e-57	1.96865e-55
YGL236C	Sbay_7.24	1267	-0.0295519	0.104036	-0.284053	0.77637	0.818344
YGR129W	Sbay_7.417	169.747	-0.692753	0.207114	-3.34478	0.000823472	0.00183442
YAR018C	Sbay_1.84	206.333	-0.202217	0.177589	-1.13868	0.254836	0.323125
YHR133C	Sbay_15.330	678.083	0.528222	0.13396	3.94314	8.04205e-05	0.00021333
YDR017C	Sbay_2.167	654.902	-0.430501	0.129405	-3.32678	0.000878543	0.00195207
YMR303C	Sbay_13.494	3042	-6.00478	0.162499	-36.9527	6.58042e-299	8.53151e-296
YOR369C	Sbay_8.425	25046.3	-0.156251	0.077688	-2.01127	0.0442974	0.0684729
YNL275W	Sbay_14.67	135.202	1.48614	0.261465	5.68391	1.31647e-08	6.0046e-08
YOL117W	Sbay_15.42	179.345	-0.0584026	0.195141	-0.299283	0.764724	0.809524
YNR014W	Sbay_14.367	253.788	-1.80624	0.17647	-10.2354	1.37644e-24	2.5677e-23
YGR021W	Sbay_7.302	1394.61	-0.308272	0.11519	-2.67619	0.00744634	0.0137671
YDR411C	Sbay_2.588	741.75	-0.289466	0.118654	-2.43958	0.0147042	0.0254611
YBR283C	Sbay_4.543	2639.75	0.439405	0.0935741	4.6958	2.65567e-06	8.8682e-06
YIL090W	Sbay_9.109	677.25	0.790875	0.117404	6.73635	1.62414e-11	1.01236e-10
YBR205W	Sbay_4.460	928.917	0.192723	0.111165	1.73366	0.0829786	0.119735
YPL027W	Sbay_16.290	50.5524	5.68352	0.675369	8.41542	3.9148e-17	4.05583e-16
YOR321W	Sbay_8.373	216.75	-0.521212	0.184016	-2.83244	0.00461947	0.00893902
YML104C	Sbay_13.40	182.477	-0.1217	0.187071	-0.650556	0.515333	0.588661
YBR183W	Sbay_4.434	1111.48	1.73301	0.136125	12.731	3.97493e-37	1.32994e-35
YMR186W	Sbay_13.367	11999	0.299016	0.0965284	3.0977	0.00195031	0.00407178
YDR195W	Sbay_2.363	364.735	0.0407129	0.151145	0.269363	0.78765	0.828887
YOR319W	Sbay_8.370	165.083	0.319691	0.225425	1.41817	0.156142	0.210162
YOL048C	Sbay_15.122	244.983	-4.20943	0.260071	-16.1857	6.36676e-59	5.15906e-57
YHR201C	Sbay_15.405	1023.28	0.638339	0.119025	5.36307	8.18204e-08	3.38914e-07
YNL256W	Sbay_14.86	582.516	-0.231746	0.127222	-1.82158	0.0685183	0.101005
YOL058W	Sbay_15.107	734.75	2.27311	0.163519	13.9012	6.22916e-44	2.83372e-42
YMR278W	Sbay_13.466	724.75	0.75701	0.119059	6.35826	2.04054e-10	1.15275e-09
YGL045W	Sbay_7.230	450.724	-1.28693	0.137434	-9.36397	7.67989e-21	1.07935e-19
YER106W	Sbay_5.227	2.03598	-3.87288	2.205	-1.7564	0.0790195	0.114917
YPR071W	Sbay_16.399	94.4739	-0.154408	0.26578	-0.58096	0.561268	0.632218
YMR107W	Sbay_13.286	71.9399	-3.93846	0.357179	-11.0266	2.84499e-28	6.44284e-27
YMR207C	Sbay_13.389	489.565	0.260308	0.131642	1.9774	0.0479966	0.0735551
YML015C	Sbay_13.145	278.083	-0.42054	0.164626	-2.55452	0.0106334	0.0190286
YOR197W	Sbay_8.253	1979.69	0.478189	0.11221	4.26157	2.02998e-05	5.97773e-05
YKR089C	Sbay_11.325	951.236	-0.0259201	0.104128	-0.248926	0.803418	0.842744
YEL004W	Sbay_5.82	139.833	-0.163922	0.21446	-0.764348	0.44466	0.522548
YER166W	Sbay_5.300	835.81	-0.448002	0.119445	-3.7507	0.000176341	0.000441362
YDL014W	Sbay_4.234	5400.65	0.496205	0.0884606	5.60934	2.03105e-08	9.06456e-08
YNL098C	Sbay_14.241	3679.08	-0.315443	0.0934364	-3.37602	0.000735436	0.00165393
YOR351C	Sbay_8.405	7.24428	0.727278	0.852883	0.852729	0.393809	0.47025
YBR056W	Sbay_4.289	2175.17	0.0857807	0.0907169	0.945587	0.344359	0.418427
YLL032C	Sbay_10.40	165.685	-0.164952	0.201633	-0.81808	0.413312	0.490045
YCR027C	Sbay_3.60	197.402	0.58137	0.195068	2.98035	0.00287919	0.00581218
YDL194W	Sbay_4.54	250.891	-0.74088	0.168052	-4.40864	1.04023e-05	3.1902e-05
YER079W	Sbay_5.192	426.292	-0.590851	0.13704	-4.31152	1.62137e-05	4.85196e-05
YBR039W	Sbay_4.271	2169.08	0.407847	0.0927137	4.399	1.08752e-05	3.3254e-05
YER024W	Sbay_5.119	137.075	-0.169575	0.208766	-0.812273	0.416635	0.493529
YDR116C	Sbay_2.275	1948.75	-0.270391	0.092232	-2.93164	0.00337175	0.00667655
YOR093C	Sbay_8.146	402.81	-0.571967	0.1382	-4.13868	3.49304e-05	9.83972e-05
YGR258C	Sbay_7.556	542.07	0.194629	0.133142	1.46182	0.143791	0.195311
YIL021W	Sbay_9.178	1238.03	-0.261277	0.104863	-2.4916	0.012717	0.0223561
YPL234C	Sbay_16.72	1796.92	0.213342	0.0945315	2.25683	0.0240187	0.0395808
YMR110C	Sbay_13.289	1553.93	-0.676166	0.109447	-6.17803	6.49062e-10	3.48812e-09
YDL056W	Sbay_4.193	471.611	-0.312528	0.144464	-2.16337	0.0305126	0.0492187
YGR234W	Sbay_7.526	21	-3.93462	0.640935	-6.13887	8.31095e-10	4.42057e-09
YPL213W	Sbay_16.93	194.917	0.419117	0.187069	2.24044	0.0250624	0.0412091
YKL117W	Sbay_11.107	4261.19	-0.0840208	0.0852086	-0.98606	0.324104	0.397346
YMR178W	Sbay_13.359	632.75	-0.352024	0.141371	-2.49006	0.012772	0.0224375
YPR017C	Sbay_16.341	235.583	1.14953	0.188448	6.09997	1.06091e-09	5.58e-09
YGL115W	Sbay_7.153	1151.67	-1.30322	0.106865	-12.195	3.30613e-34	9.79747e-33
YNL299W	Sbay_14.41	207.102	0.563465	0.197023	2.85989	0.00423782	0.00827149
YOL129W	Sbay_15.31	1309.25	-0.528022	0.100581	-5.24971	1.5234e-07	6.09597e-07
YEL044W	Sbay_5.25	445.73	-0.889124	0.147894	-6.01188	1.83383e-09	9.3421e-09
YMR247C	Sbay_13.432	584.412	0.950585	0.128128	7.41901	1.18002e-13	9.03928e-13
YDR427W	Sbay_2.603	1293.25	0.605626	0.10668	5.67705	1.37035e-08	6.24486e-08
YML071C	Sbay_13.84	504.378	-0.618289	0.13121	-4.7122	2.45058e-06	8.22038e-06
YBR077C	Sbay_4.316	361.5	-0.43173	0.158892	-2.71713	0.00658506	0.0123375
YDR176W	Sbay_2.342	734.525	0.232478	0.123201	1.88698	0.0591636	0.0886774
YPL177C	Sbay_16.132	1020.22	1.84088	0.144848	12.709	5.26741e-37	1.75108e-35
YDR122W	Sbay_2.283	1096.12	0.146063	0.10683	1.36725	0.171546	0.22801
YER120W	Sbay_5.241	2147.3	0.158914	0.094014	1.69032	0.0909665	0.130031
YNL090W	Sbay_14.250	310.25	0.154091	0.163666	0.9415	0.346448	0.42008
YBR042C	Sbay_4.274	435.833	1.1064	0.1609	6.87633	6.14157e-12	3.97134e-11
YOL062C	Sbay_15.103	1166.33	-0.465878	0.104357	-4.46426	8.03449e-06	2.50552e-05
YDR381W	Sbay_2.555	3234.71	0.65517	0.0966918	6.77585	1.23675e-11	7.81217e-11
YGL103W	Sbay_7.164	23490.1	0.0544799	0.0755672	0.720947	0.470942	0.547244
YDR484W	Sbay_2.658	238.816	-0.224611	0.173044	-1.298	0.194288	0.254118
YJL194W	Sbay_6.274	76.0833	-0.910976	0.303617	-3.00041	0.00269617	0.00548974
YMR098C	Sbay_13.275	613.718	-0.25082	0.126295	-1.98598	0.0470355	0.0722316
YOL022C	Sbay_15.145	688.75	0.307229	0.123547	2.48674	0.0128919	0.0226191
YGR192C	Sbay_7.486	116951	-1.27788	0.0757744	-16.8642	8.24863e-64	7.25041e-62
YBR095C	Sbay_4.342	544.116	1.14895	0.156934	7.32123	2.45715e-13	1.8204e-12
YHR111W	Sbay_15.307	456.583	0.58415	0.142352	4.10355	4.06853e-05	0.000112952
YBL045C	Sbay_2.72	4041	-0.0268955	0.0943233	-0.285141	0.775536	0.817964
YGL071W	Sbay_7.198	585.337	0.201204	0.142811	1.40888	0.158871	0.213281
YDR524C	Sbay_2.706	220.213	-1.89526	0.204922	-9.24872	2.27188e-20	3.03659e-19
YGR043C	Sbay_7.328	291.5	0.855692	0.219751	3.89391	9.86424e-05	0.000258103
YPR170W-B	Sbay_16.502	743.105	6.70881	0.393995	17.0277	5.12101e-65	4.74242e-63
YOR224C	Sbay_8.276	967.917	-0.177515	0.118402	-1.49925	0.133808	0.183336
YDL070W	Sbay_4.179	1422.5	0.363209	0.110997	3.27224	0.001067	0.00233579
YNL193W	Sbay_14.148	448.704	0.0627128	0.166994	0.375539	0.70726	0.762864
YCR047C	Sbay_3.86	431.333	1.24451	0.170677	7.2916	3.06297e-13	2.25313e-12
YMR187C	Sbay_13.368	129.503	0.895998	0.242366	3.69688	0.000218268	0.000535448
YPL223C	Sbay_16.83	38.8141	-0.449974	0.38907	-1.15654	0.247461	0.314774
YML096W	Sbay_13.52	304.196	0.802391	0.170186	4.71478	2.41976e-06	8.14334e-06
YPL272C	Sbay_16.33	138.333	2.48137	0.271326	9.14531	5.94573e-20	7.78651e-19
YKL135C	Sbay_11.90	908.417	-0.0654344	0.115765	-0.565236	0.571914	0.641563
YER064C	Sbay_5.174	1194.96	0.603812	0.380123	1.58846	0.112181	0.157278
YDR389W	Sbay_2.565	742.095	1.22106	0.131895	9.25779	2.08715e-20	2.80414e-19
YOL002C	Sbay_15.173	451.425	0.498994	0.16418	3.03932	0.00237114	0.00487772
YLR190W	Sbay_10.286	625.53	-0.206423	0.123342	-1.67358	0.0942133	0.134228
YML111W	Sbay_13.33	450.333	0.582729	0.150919	3.86121	0.000112827	0.000292853
YOR359W	Sbay_8.415	266.013	0.497611	0.179643	2.77	0.00560559	0.0106642
YLL021W	Sbay_10.54	798.664	0.203256	0.119595	1.69953	0.0892186	0.127991
YKL205W	Sbay_11.17	439.458	0.030577	0.134617	0.227141	0.820314	0.857173
YLR407W	Sbay_10.523	182.704	-9.08105	1.29772	-6.99771	2.60178e-12	1.75917e-11
YBR088C	Sbay_4.335	761.167	-0.16482	0.141795	-1.16238	0.245081	0.312233
YLR425W	Sbay_10.542	219.555	-0.471253	0.175712	-2.68196	0.00731921	0.0135562
YBR055C	Sbay_4.287	326.917	-0.540468	0.161214	-3.35249	0.000800874	0.00179023
YOR175C	Sbay_8.228	919.254	-0.325349	0.114051	-2.85268	0.00433529	0.00844901
YER033C	Sbay_5.131	291.544	0.0995347	0.158908	0.626366	0.531075	0.603717
YNL329C	Sbay_14.12	910.065	1.13412	0.122755	9.23888	2.49095e-20	3.32084e-19
YFL005W	Sbay_6.54	1556.33	-0.0201933	0.0970692	-0.20803	0.835206	0.869755
YOR298W	Sbay_8.347	9.36866	-3.42743	1.12851	-3.03713	0.00238845	0.00490944
YCR010C	Sbay_3.35	6.5	0.574107	0.853058	0.672999	0.500948	0.575222
YKL110C	Sbay_11.113	440.5	-1.38999	0.175303	-7.92905	2.20831e-15	1.99518e-14
YMR014W	Sbay_13.181	508.394	-0.520076	0.152021	-3.42108	0.000623722	0.00142056
YPR040W	Sbay_16.369	436.413	0.601415	0.147811	4.06882	4.72523e-05	0.000130069
YGR056W	Sbay_7.338	454.287	0.185044	0.141154	1.31093	0.18988	0.24898
YMR152W	Sbay_13.330	1683	-3.513	0.111748	-31.4367	6.37922e-217	6.61653e-214
YPL166W	Sbay_16.144	155.567	0.1634	0.204769	0.797973	0.424886	0.501813
YML057W	Sbay_13.101	959.432	-0.724485	0.124338	-5.82674	5.65212e-09	2.70905e-08
YDR178W	Sbay_2.344	1107.67	0.0206541	0.112908	0.182929	0.854854	0.884003
YKR038C	Sbay_11.270	684.083	-0.195667	0.122339	-1.59938	0.109736	0.1541
YGL028C	Sbay_7.252	307.968	-11.6209	1.31624	-8.82889	1.05717e-18	1.26909e-17
YLR288C	Sbay_10.384	151.414	0.0316949	0.203692	0.155602	0.876347	0.902449
YJR004C	Sbay_12.87	150.677	-0.654967	0.202362	-3.23661	0.00120958	0.00261697
YCL026C-B	Sbay_3.188	17.4167	-7.82586	1.31066	-5.97092	2.35918e-09	1.18439e-08
YJL115W	Sbay_6.196	395.704	-0.271656	0.145814	-1.86303	0.0624587	0.0931314
YJR073C	Sbay_12.163	1741.83	0.442361	0.12304	3.59528	0.000324046	0.000772289
YGL004C	Sbay_7.278	396.642	-0.46303	0.134964	-3.43076	0.000601895	0.00137387
YLR204W	Sbay_10.298	1538.62	-0.698155	0.0962738	-7.25177	4.11368e-13	2.99208e-12
YML097C	Sbay_13.51	365.277	-0.217459	0.149914	-1.45056	0.146903	0.198966
YIR030C	Sbay_9.246	19.1494	2.23388	0.63699	3.50694	0.000453299	0.00105502
YLR055C	Sbay_10.139	338.868	0.380495	0.158712	2.3974	0.016512	0.0283547
YJL055W	Sbay_6.131	1382.08	-0.582934	0.112886	-5.16394	2.41811e-07	9.45013e-07
YPR102C	Sbay_16.428	10393.8	-0.582738	0.0816989	-7.13275	9.83808e-13	6.94154e-12
YNL225C	Sbay_14.117	181.833	-0.745372	0.200859	-3.71092	0.000206505	0.000508516
YHR193C	Sbay_15.396	8133.95	0.0524851	0.0848705	0.618415	0.536302	0.608991
YMR292W	Sbay_13.482	157.25	-0.495169	0.227715	-2.17451	0.0296671	0.0480492
YOR380W	Sbay_8.436	239.441	0.449191	0.186201	2.4124	0.0158479	0.0272956
YBL099W	Sbay_2.18	6882.83	0.394281	0.0780253	5.05325	4.34353e-07	1.64022e-06
YMR132C	Sbay_13.312	101.25	-0.874578	0.277944	-3.1466	0.00165179	0.00348929
YDR303C	Sbay_2.469	335.811	-0.293481	0.151828	-1.93298	0.0532383	0.0806584
YPL008W	Sbay_16.310	333.173	0.0550144	0.149204	0.36872	0.712337	0.767223
YJR035W	Sbay_12.118	463.488	0.184838	0.132308	1.39703	0.162405	0.217575
YOR126C	Sbay_8.178	349.333	0.829336	0.159631	5.19531	2.04375e-07	8.05387e-07
YNL191W	Sbay_14.150	401.92	-1.19364	0.180639	-6.60791	3.89785e-11	2.36572e-10
YDL116W	Sbay_4.130	621.917	0.438381	0.130512	3.35893	0.000782457	0.00175057
YPL184C	Sbay_16.123	381.376	-1.79126	0.1672	-10.7133	8.81583e-27	1.8361e-25
YER034W	Sbay_5.132	120.693	-0.509973	0.241108	-2.11512	0.0344196	0.0548051
YPR153W	Sbay_16.481	50.4588	1.31941	0.348236	3.78884	0.000151353	0.000384385
YMR042W	Sbay_13.212	153.108	0.197964	0.24346	0.813126	0.416146	0.493174
YDR252W	Sbay_2.418	91.6667	0.787037	0.276934	2.84197	0.00448361	0.00870535
YLL003W	Sbay_10.73	340.583	0.23331	0.156663	1.48925	0.136422	0.186622
YOR165W	Sbay_8.219	1321.29	-0.086505	0.0990876	-0.873015	0.382655	0.459044
YDR054C	Sbay_2.211	1305.3	0.435352	0.105041	4.14458	3.40443e-05	9.60574e-05
YNL323W	Sbay_14.17	715.039	0.805255	0.124473	6.4693	9.84557e-11	5.70493e-10
YLR409C	Sbay_10.525	1034.5	0.58047	0.125802	4.61415	3.94703e-06	1.28576e-05
YNL316C	Sbay_14.23	257.25	0.364278	0.173942	2.09425	0.0362377	0.0573303
YLR081W	Sbay_10.164	336.348	4.663	0.223835	20.8323	2.20462e-96	4.08328e-94
YDR109C	Sbay_2.269	270.502	0.436984	0.168856	2.5879	0.00965626	0.0174425
YPL088W	Sbay_16.224	959.583	-0.43148	0.127385	-3.38721	0.000706071	0.00159204
YJL046W	Sbay_6.120	367.942	-1.29082	0.164259	-7.85845	3.88931e-15	3.41285e-14
YPL099C	Sbay_16.212	268.286	-0.587762	0.158913	-3.69864	0.000216754	0.000532239
YOR092W	Sbay_8.145	448.776	-1.95497	0.19011	-10.2834	8.37193e-25	1.58456e-23
YMR041C	Sbay_13.210	177.42	0.00156375	0.202863	0.00770838	0.99385	0.996347
YDR221W	Sbay_2.388	506.03	-0.321907	0.137881	-2.33467	0.0195605	0.0329995
YML066C	Sbay_13.90	2.33333	3.98308	1.93079	2.06293	0.039119	0.061446
YLR109W	Sbay_10.199	20528	-0.550389	0.130056	-4.23192	2.317e-05	6.73919e-05
YMR096W	Sbay_13.273	2659.28	3.27698	0.29098	11.2619	2.02453e-29	4.72938e-28
YKR009C	Sbay_11.240	166.25	-0.955042	0.205024	-4.65819	3.19008e-06	1.05107e-05
YDR078C	Sbay_2.237	178.25	0.882934	0.212799	4.14915	3.33708e-05	9.44655e-05
YOR358W	Sbay_8.414	647.561	-0.327877	0.145137	-2.25908	0.0238784	0.0394248
YKL103C	Sbay_11.121	2122.58	0.256395	0.106819	2.40028	0.0163827	0.02817
YCR061W	Sbay_3.96	515.96	1.74032	0.164709	10.566	4.28167e-26	8.74203e-25
YMR109W	Sbay_13.288	1385.07	0.70389	0.107612	6.54099	6.11124e-11	3.63034e-10
YMR078C	Sbay_13.257	254.378	0.379796	0.171976	2.20842	0.027215	0.0444386
YLR094C	Sbay_10.178	323.4	0.289142	0.179	1.61532	0.106242	0.149763
YDL154W	Sbay_4.91	105.723	-1.51956	0.286021	-5.31274	1.07991e-07	4.39592e-07
YDR232W	Sbay_2.398	1178.08	-0.798798	0.103248	-7.73668	1.02049e-14	8.56352e-14
YNL262W	Sbay_14.80	489.255	-0.31567	0.133228	-2.3694	0.0178171	0.0303946
YDR245W	Sbay_2.411	1124.63	-0.482956	0.110483	-4.3713	1.23506e-05	3.75882e-05
YHR088W	Sbay_15.282	680.667	1.10784	0.125679	8.81486	1.19837e-18	1.43196e-17
YLR114C	Sbay_10.205	620.112	0.276645	0.13585	2.0364	0.0417098	0.0650547
YLR390W	Sbay_10.507	337.528	-0.116745	0.145812	-0.80066	0.423329	0.500201
YBR017C	Sbay_2.146	1235.07	0.317599	0.104276	3.04574	0.00232106	0.00478989
YKR014C	Sbay_11.246	1075.38	0.000139629	0.131176	0.00106444	0.999151	0.999536
YML037C	Sbay_13.122	78.2612	0.410644	0.271641	1.51172	0.130606	0.179661
YDL138W	Sbay_4.106	160.426	0.127227	0.230911	0.55098	0.581648	0.650933
YOR056C	Sbay_8.105	733.397	-0.129858	0.129408	-1.00348	0.315629	0.388248
YJR060W	Sbay_12.149	297.918	0.403961	0.164657	2.45336	0.014153	0.0246053
YPR118W	Sbay_16.446	607.417	-1.01378	0.13842	-7.32396	2.4075e-13	1.78616e-12
YLR141W	Sbay_10.235	81.9487	-0.168633	0.264534	-0.637471	0.523818	0.596775
YPR162C	Sbay_16.492	258.667	0.162875	0.173035	0.941288	0.346557	0.420114
YDL089W	Sbay_4.155	321.377	0.56486	0.15271	3.6989	0.000216533	0.000531947
YLR178C	Sbay_10.275	1577.67	-0.982792	0.147867	-6.64648	3.0018e-11	1.83577e-10
YHR175W	Sbay_15.375	569.586	-0.0705406	0.119919	-0.588238	0.556372	0.628069
YGR166W	Sbay_7.458	284.628	0.452066	0.190968	2.36723	0.017922	0.0305567
YDL161W	Sbay_4.83	937.812	0.0602813	0.11674	0.516375	0.605593	0.67265
YKL101W	Sbay_11.123	851.207	-0.1126	0.119379	-0.943212	0.345573	0.419443
YKL050C	Sbay_11.176	261.11	1.35282	0.186382	7.25829	3.92012e-13	2.86334e-12
YOR191W	Sbay_8.247	690.771	-0.353382	0.116251	-3.03982	0.00236718	0.00487152
YGR096W	Sbay_7.379	176.666	0.878124	0.218061	4.02696	5.65021e-05	0.000153333
YKL055C	Sbay_11.171	27.75	-3.20541	0.553933	-5.78664	7.18073e-09	3.39464e-08
YOR370C	Sbay_8.426	1330.62	-0.137829	0.10509	-1.31154	0.189676	0.248823
YDL212W	Sbay_4.35	1622.48	0.0272906	0.0955165	0.285716	0.775096	0.817666
YMR298W	Sbay_13.488	712.682	1.17988	0.116117	10.1612	2.95498e-24	5.39595e-23
YNL161W	Sbay_14.178	712.941	-0.636633	0.137888	-4.61703	3.89269e-06	1.26885e-05
YGR184C	Sbay_7.477	1200.5	-0.250524	0.121927	-2.05471	0.0399071	0.0625251
YDR096W	Sbay_2.255	852.333	-0.62022	0.109493	-5.66449	1.47458e-08	6.70218e-08
YJL126W	Sbay_6.205	254.417	0.0782291	0.166663	0.469385	0.638795	0.702272
YPR111W	Sbay_16.439	280.667	0.849096	0.155133	5.47333	4.41665e-08	1.88362e-07
YBR175W	Sbay_4.427	251.833	1.08156	0.172069	6.28563	3.26532e-10	1.81112e-09
YPL046C	Sbay_16.269	86.9314	1.31423	0.280492	4.68545	2.7934e-06	9.28628e-06
YGL099W	Sbay_7.167	746.167	0.887549	0.121303	7.31678	2.53983e-13	1.87897e-12
YMR251W	Sbay_13.435	27.9167	1.32218	0.467543	2.82794	0.00468489	0.00905547
YFL030W	Sbay_6.28	85.0833	-1.11969	0.266093	-4.2079	2.5775e-05	7.43845e-05
YIL119C	Sbay_9.74	5.7794	-2.08824	4.31769	-0.483646	0.628637	0.692168
YIL002W-A	Sbay_9.205	500.19	0.236804	0.129457	1.82921	0.0673681	0.0994792
YPL124W	Sbay_16.186	119.583	-0.377403	0.234263	-1.61102	0.107175	0.150912
YPL193W	Sbay_16.113	283.833	-0.718999	0.171488	-4.19271	2.75645e-05	7.92402e-05
YKL196C	Sbay_11.27	1361	0.466825	0.106737	4.37362	1.22204e-05	3.72576e-05
YDR314C	Sbay_2.482	120.083	-0.40927	0.218005	-1.87734	0.0604713	0.0903935
YJL144W	Sbay_6.224	583.492	-0.176213	0.168899	-1.04331	0.296807	0.368327
YLR231C	Sbay_10.327	483.212	1.48589	0.179456	8.28001	1.23168e-16	1.22601e-15
YPL067C	Sbay_16.245	249.917	1.8621	0.187662	9.92262	3.31932e-23	5.57087e-22
YOR360C	Sbay_8.417	639.546	-0.354852	0.131173	-2.70522	0.0068259	0.0127289
YDR255C	Sbay_2.421	384.583	0.166869	0.136061	1.22643	0.220038	0.283311
YFR021W	Sbay_6.93	396.583	0.45017	0.155773	2.88991	0.00385346	0.00756113
YKL098W	Sbay_11.126	257.619	-1.27345	0.188645	-6.75049	1.4735e-11	9.20672e-11
YJR139C	Sbay_12.232	2556.92	-0.0305111	0.0893693	-0.341405	0.732799	0.783887
YKL016C	Sbay_11.212	1464.33	0.988822	0.11373	8.69446	3.4847e-18	3.97179e-17
YBR133C	Sbay_4.382	913.927	1.82389	0.130554	13.9703	2.36463e-44	1.10477e-42
YGL017W	Sbay_7.262	276.167	0.364753	0.183485	1.98792	0.0468206	0.0719869
YBR162C	Sbay_4.413	2019.92	0.0723995	0.0926706	0.781256	0.434652	0.511947
YCR018C	Sbay_3.45	11.1083	-6.82004	1.38175	-4.93581	7.98174e-07	2.90479e-06
YIL004C	Sbay_9.203	210.417	-1.07995	0.179048	-6.03161	1.62332e-09	8.30231e-09
YPR129W	Sbay_16.456	1362.96	0.737159	0.0970513	7.59555	3.0648e-14	2.49906e-13
YKL174C	Sbay_11.49	529.254	-0.772509	0.124905	-6.18478	6.21898e-10	3.35605e-09
YJR013W	Sbay_12.98	316.167	0.126295	0.155576	0.811792	0.416911	0.493532
YJL133W	Sbay_6.213	366.333	-1.33416	0.156406	-8.53008	1.4625e-17	1.56705e-16
YGR260W	Sbay_7.557	2114.83	0.727392	0.124429	5.84583	5.04048e-09	2.43843e-08
YBL084C	Sbay_2.34	256.778	-0.38842	0.168539	-2.30463	0.0211873	0.0355244
YKR094C	Sbay_11.330	12978.6	0.132787	0.0786759	1.68777	0.091456	0.130623
YKR018C	Sbay_11.250	2011.69	-0.236733	0.113981	-2.07695	0.0378065	0.0595398
YDR143C	Sbay_2.304	623.705	-0.592562	0.130359	-4.54563	5.47707e-06	1.7501e-05
YDL176W	Sbay_4.71	169.333	-0.29938	0.200053	-1.4965	0.134522	0.184169
YBR111C	Sbay_4.359	1546.77	0.52581	0.11109	4.73317	2.21039e-06	7.50692e-06
YPR037C	Sbay_16.368	497.787	-0.174803	0.13204	-1.32386	0.185549	0.244413
YKL121W	Sbay_11.103	409.33	0.0195426	0.136831	0.142823	0.88643	0.910483
YML036W	Sbay_13.123	168.718	-1.00072	0.230525	-4.34105	1.41802e-05	4.29047e-05
YKR027W	Sbay_11.260	257.5	0.583807	0.196101	2.97707	0.00291017	0.00586785
YFL047W	Sbay_6.6	313.359	-0.727543	0.169389	-4.29512	1.74602e-05	5.192e-05
YGR201C	Sbay_7.495	121.083	-2.92228	0.256101	-11.4107	3.69854e-30	8.9629e-29
YPR122W	Sbay_16.451	15.2752	-1.35799	0.665318	-2.04111	0.0412396	0.0643988
YLR380W	Sbay_10.497	574.867	-0.866914	0.1298	-6.67886	2.40814e-11	1.48061e-10
YKL034W	Sbay_11.189	385	0.723971	0.141062	5.13228	2.86257e-07	1.10456e-06
YKL061W	Sbay_11.165	219.667	-0.157097	0.189594	-0.828595	0.407334	0.484614
YJR042W	Sbay_12.124	817.417	-0.718787	0.132056	-5.44305	5.2375e-08	2.21104e-07
YMR281W	Sbay_13.470	410.472	1.53869	0.147809	10.41	2.23168e-25	4.35094e-24
YNL058C	Sbay_14.282	506.621	-0.486331	0.144246	-3.37154	0.000747491	0.00167886
YMR012W	Sbay_13.176	4115.04	-0.114241	0.0916775	-1.24612	0.212721	0.275105
YER093C	Sbay_5.211	491.802	0.51211	0.137469	3.72526	0.000195111	0.000483211
YGR100W	Sbay_7.383	829.361	0.0585309	0.111103	0.526818	0.59832	0.665713
YLR133W	Sbay_10.226	581.5	0.00688104	0.135613	0.0507402	0.959533	0.968308
YNL023C	Sbay_14.324	408.328	-0.0271878	0.144304	-0.188406	0.850558	0.880812
YDR349C	Sbay_2.520	958.883	-0.384062	0.107485	-3.57317	0.000352691	0.000836713
YIR011C	Sbay_9.222	690.735	0.264945	0.129799	2.04119	0.0412317	0.0643988
YOR171C	Sbay_8.224	634.083	-0.96691	0.121888	-7.93278	2.143e-15	1.94294e-14
YDR214W	Sbay_2.382	1780	-0.173325	0.0981142	-1.76656	0.0773014	0.11264
YIL126W	Sbay_9.65	1113.47	0.107803	0.105796	1.01897	0.308217	0.380937
YIL106W	Sbay_9.89	302.185	-0.523615	0.151125	-3.46479	0.000530655	0.00122093
YLR201C	Sbay_10.296	813.167	1.14588	0.132067	8.67649	4.08158e-18	4.60154e-17
YLR295C	Sbay_10.390	961.917	0.124876	0.115742	1.07891	0.280627	0.350852
YDL201W	Sbay_4.47	481	0.0440567	0.144039	0.305866	0.759706	0.805934
YDR468C	Sbay_2.643	419.959	-0.181143	0.142139	-1.2744	0.20252	0.263489
YDR332W	Sbay_2.502	186.077	-0.476096	0.18466	-2.57823	0.0099308	0.0178886
YHR168W	Sbay_15.368	532.546	1.06063	0.144069	7.36197	1.81212e-13	1.36793e-12
YOL102C	Sbay_15.63	250.554	0.538372	0.176857	3.04411	0.00233366	0.00481208
YOR064C	Sbay_8.114	197.25	0.248075	0.213791	1.16036	0.245903	0.313099
YKL017C	Sbay_11.211	301.917	-0.491021	0.1829	-2.68465	0.00726067	0.0134574
YOR159C	Sbay_8.210	303.255	-0.0446146	0.154741	-0.288318	0.773103	0.816035
YOR048C	Sbay_8.100	1039.72	0.352819	0.107178	3.29188	0.000995206	0.00218878
YJL147C	Sbay_6.227	119.667	0.948523	0.235972	4.01965	5.82843e-05	0.000157839
YFR003C	Sbay_6.66	512.333	-0.627837	0.132802	-4.72761	2.27182e-06	7.70547e-06
YNL297C	Sbay_14.43	631.483	0.386283	0.116875	3.30509	0.000949461	0.00209617
YOL081W	Sbay_15.85	1304.25	-0.186906	0.103812	-1.80043	0.0717924	0.105472
YIL033C	Sbay_9.167	3189.83	-0.818497	0.103434	-7.9132	2.50865e-15	2.25474e-14
YOL036W	Sbay_15.132	672.645	0.0120476	0.120667	0.0998425	0.920469	0.936175
YGL148W	Sbay_7.116	2954.17	0.389091	0.0989403	3.93259	8.40371e-05	0.000222129
YOR002W	Sbay_15.177	717.75	-0.609509	0.119349	-5.10695	3.27404e-07	1.25586e-06
YNR041C	Sbay_14.397	734.592	1.82513	0.137208	13.3019	2.25648e-40	8.73291e-39
YPL162C	Sbay_16.148	258.445	0.871741	0.171892	5.07145	3.94791e-07	1.49882e-06
YIL048W	Sbay_9.152	749.766	0.677029	0.128397	5.27292	1.34272e-07	5.41472e-07
YDR189W	Sbay_2.358	1250.86	0.364301	0.109202	3.33603	0.000849838	0.00189072
YAL028W	Sbay_1.38	249.693	0.786389	0.16306	4.82269	1.41634e-06	4.95623e-06
YOL056W	Sbay_15.109	264.733	-0.271325	0.179436	-1.5121	0.130509	0.179614
YGR116W	Sbay_7.399	1920.92	-0.373902	0.0904801	-4.13242	3.58968e-05	0.000101001
YFR052W	Sbay_12.5	1017.17	0.191946	0.139356	1.37738	0.168396	0.224499
YMR302C	Sbay_13.492	1273.81	-0.326518	0.109987	-2.96869	0.00299073	0.00600927
YBR282W	Sbay_4.542	1283.17	-0.00439615	0.0995724	-0.0441502	0.964785	0.972473
YOR079C	Sbay_8.128	152.5	-0.53795	0.249504	-2.15608	0.0310775	0.0499901
YIL024C	Sbay_9.174	76.4036	0.586865	0.282252	2.07922	0.0375971	0.0592459
YHR132C	Sbay_15.328	1164.46	-0.404348	0.104648	-3.8639	0.000111592	0.000289792
YGR088W	Sbay_7.370	8749.17	1.06348	0.120778	8.80528	1.3053e-18	1.5455e-17
YLR103C	Sbay_10.188	193.555	0.40363	0.215663	1.87158	0.0612652	0.0914833
YBR230W-A	Sbay_4.486	136.408	-0.457007	0.235781	-1.93826	0.0525909	0.0797942
YLR188W	Sbay_10.284	609.567	-0.16239	0.120048	-1.35271	0.17615	0.233337
YGL073W	Sbay_7.197	435.75	-0.822167	0.137149	-5.99469	2.03873e-09	1.03049e-08
YDR194C	Sbay_2.362	6205.42	0.434984	0.0851025	5.1113	3.19955e-07	1.2291e-06
YNL243W	Sbay_14.99	1760.69	0.492975	0.0990213	4.97847	6.40885e-07	2.36389e-06
YDR014W	Sbay_2.162	105.944	-0.588596	0.250898	-2.34596	0.0189783	0.0321114
YKR074W	Sbay_11.310	547.738	-0.638092	0.127648	-4.99883	5.76806e-07	2.13971e-06
YJR108W	Sbay_12.198	22.2945	-7.60519	1.28326	-5.92647	3.09517e-09	1.53017e-08
YBR180W	Sbay_4.431	2.25	-0.197414	1.60298	-0.123154	0.901985	0.921169
YHL029C	Sbay_8.22	410.934	0.680306	0.162137	4.19588	2.7181e-05	7.82247e-05
YIL093C	Sbay_9.106	2624.42	-0.115362	0.0917936	-1.25676	0.208841	0.270695
YBR204C	Sbay_4.459	595.25	0.0604195	0.136672	0.442077	0.658433	0.720235
YJR115W	Sbay_12.206	238.488	0.786132	0.218406	3.5994	0.000318949	0.000760492
YDR466W	Sbay_2.642	478.347	-0.441751	0.135463	-3.26105	0.00111	0.00242072
YPL023C	Sbay_16.295	1068.83	-0.175064	0.120174	-1.45676	0.145183	0.196841
YLR397C	Sbay_10.514	375.417	-1.13721	0.173211	-6.56548	5.18665e-11	3.10959e-10
YJL210W	Sbay_6.289	511.75	0.650457	0.173698	3.74476	0.000180569	0.000451293
YFR045W	Sbay_12.12	443.501	0.268672	0.137202	1.95822	0.0502039	0.0766433
YPR152C	Sbay_16.480	259.924	0.544235	0.198612	2.74019	0.00614028	0.0115879
YIL104C	Sbay_9.91	246.417	0.944268	0.215917	4.37329	1.22389e-05	3.72921e-05
YIL151C	Sbay_9.37	495.149	-0.0359581	0.142049	-0.253138	0.800161	0.839667
YIL002C	Sbay_9.206	423	-0.233879	0.134834	-1.73456	0.0828181	0.11957
YMR112C	Sbay_13.291	157.6	-0.61291	0.208108	-2.94516	0.00322792	0.00641872
YGL086W	Sbay_7.183	362.507	-0.0164597	0.166597	-0.0987996	0.921297	0.936833
YGR159C	Sbay_7.450	5426.65	0.391987	0.097489	4.02084	5.7991e-05	0.000157127
YDL223C	Sbay_4.21	1105.46	0.960723	0.100835	9.52771	1.60788e-21	2.37563e-20
YAL044C	Sbay_1.20	2350.5	-0.221737	0.103127	-2.15013	0.031545	0.0506792
YBR213W	Sbay_4.471	139.417	0.464359	0.237027	1.9591	0.0501011	0.076509
YNL234W	Sbay_14.109	330.759	0.798226	0.174301	4.57959	4.65886e-06	1.50817e-05
YLR355C	Sbay_10.456	6333.33	0.768808	0.0885943	8.67785	4.03328e-18	4.56694e-17
YJL116C	Sbay_6.197	290.251	0.348258	0.21097	1.65075	0.0987904	0.140248
YGL089C	Sbay_7.180	7.36304	1.35204	0.935876	1.44468	0.148548	0.200879
YFR032C	Sbay_6.106	18.475	-2.13873	0.680651	-3.14219	0.00167689	0.00353798
YNL118C	Sbay_14.221	1435.55	-0.0174716	0.104137	-0.167776	0.86676	0.893641
YNR030W	Sbay_14.384	504.917	0.169207	0.130339	1.2982	0.194219	0.254091
YJR119C	Sbay_12.210	175.875	1.58435	0.221446	7.15456	8.39402e-13	5.9632e-12
YNR023W	Sbay_14.378	471.5	0.591997	0.141509	4.18347	2.87095e-05	8.23038e-05
YOL096C	Sbay_15.69	863	0.0856491	0.111886	0.765504	0.443972	0.521858
YGL228W	Sbay_7.31	1511.05	0.525808	0.124289	4.23053	2.33138e-05	6.77192e-05
YDR284C	Sbay_2.450	447.043	-2.39591	0.155779	-15.3802	2.22277e-53	1.47786e-51
YJR117W	Sbay_12.208	1079.42	-0.784599	0.106611	-7.35943	1.84697e-13	1.38818e-12
YJL097W	Sbay_6.171	486.167	0.316364	0.135307	2.33812	0.019381	0.0327287
YBR259W	Sbay_4.521	141.62	1.02179	0.230297	4.43682	9.12957e-06	2.82494e-05
YGR111W	Sbay_7.396	887.333	0.37025	0.1884	1.96523	0.0493874	0.0755526
YGL155W	Sbay_7.110	352.833	-0.594884	0.153191	-3.8833	0.000103049	0.00026882
YPR108W	Sbay_16.435	1799.67	0.429411	0.0978145	4.39006	1.1332e-05	3.45693e-05
YOR007C	Sbay_15.182	3768.5	-0.169893	0.0890513	-1.90781	0.0564154	0.0849261
YLR451W	Sbay_10.569	474.371	-1.02283	0.151118	-6.76841	1.30208e-11	8.19489e-11
YDR406W	Sbay_2.583	3434.35	2.05173	0.148578	13.8091	2.24565e-43	9.86943e-42
YBR193C	Sbay_4.447	318.418	0.0351687	0.149591	0.235099	0.814132	0.851914
YJR101W	Sbay_12.190	2568.08	-0.0411685	0.0955226	-0.430981	0.666482	0.727505
YJR120W	Sbay_12.211	115.155	0.422302	0.227887	1.85312	0.0638656	0.0946847
YPR163C	Sbay_16.493	5009.11	0.072948	0.0956065	0.763003	0.445462	0.523254
YHR143W	Sbay_15.340	872.831	0.719488	0.143638	5.00905	5.46985e-07	2.03637e-06
YBR222C	Sbay_4.479	1155.92	-0.460667	0.145834	-3.15885	0.00158391	0.00335958
YPR088C	Sbay_16.417	1693.64	-0.00412752	0.097149	-0.0424865	0.966111	0.973242
YLR131C	Sbay_10.224	326.35	0.234704	0.158627	1.4796	0.138981	0.189572
YPR101W	Sbay_16.427	326.25	0.921623	0.149777	6.1533	7.58847e-10	4.04875e-09
YER127W	Sbay_5.248	501.788	0.47751	0.138299	3.45273	0.000554943	0.0012723
YNL091W	Sbay_14.249	1656.1	-0.269471	0.0979364	-2.7515	0.00593238	0.0112364
YEL005C	Sbay_5.81	205.583	-0.937249	0.178533	-5.24973	1.52323e-07	6.09597e-07
YCL004W	Sbay_3.15	344.917	0.779077	0.1529	5.09535	3.48094e-07	1.33325e-06
YKR095W-A	Sbay_11.332	188.108	0.805553	0.189479	4.25141	2.12425e-05	6.22041e-05
YBR096W	Sbay_4.343	432	-0.380046	0.141336	-2.68895	0.00716775	0.0133042
YGR133W	Sbay_7.421	314.51	1.09872	0.217012	5.06294	4.12837e-07	1.56389e-06
YJL193W	Sbay_6.273	153.667	1.14045	0.221168	5.15647	2.51651e-07	9.79775e-07
YBL044W	Sbay_2.73	1.43829	-0.7365	2.2269	-0.330728	0.74085	0.79087
YEL027W	Sbay_5.42	3876.58	-0.169702	0.0844916	-2.0085	0.0445899	0.0688634
YHL012W	Sbay_8.40	3.33013	3.57234	1.69457	2.10811	0.0350211	0.0556064
YDL015C	Sbay_4.233	1301	0.046356	0.103686	0.447081	0.654816	0.716581
YDL071C	Sbay_4.178	0.760263	-2.23177	3.08938	-0.722403	0.470047	0.546439
YDR123C	Sbay_2.284	198.75	-0.0779653	0.21597	-0.361	0.718099	0.772365
YHR110W	Sbay_15.306	490.5	-0.305714	0.13071	-2.33886	0.0193426	0.0326745
YBR041W	Sbay_4.273	556.583	0.0140608	0.136905	0.102705	0.918197	0.934047
YPR145C-A	Sbay_16.475	114.447	0.183903	0.26089	0.704907	0.480868	0.556399
YDR430C	Sbay_2.606	2476	0.0330752	0.104767	0.315704	0.752227	0.799232
YGR193C	Sbay_7.487	1650.59	1.11519	0.101161	11.0239	2.92951e-28	6.60541e-27
YDR487C	Sbay_2.661	1522.58	-0.593934	0.117604	-5.05029	4.41137e-07	1.66009e-06
YPR185W	Sbay_16.517	530.938	-0.0444346	0.135045	-0.329037	0.742128	0.791746
YIL142W	Sbay_9.47	2359.92	-0.0204474	0.0885121	-0.231012	0.817305	0.854373
YGR015C	Sbay_7.297	106.489	0.264511	0.261235	1.01254	0.311278	0.383989
YOR242C	Sbay_8.292	7.3293	-3.97165	1.23527	-3.21522	0.00130346	0.00280372
YNR035C	Sbay_14.391	1855.92	-0.53525	0.0944115	-5.66933	1.43354e-08	6.52371e-08
YER065C	Sbay_5.175	86.5277	-2.16087	0.301124	-7.17602	7.1768e-13	5.12657e-12
YNR020C	Sbay_14.375	724.325	0.741838	0.139143	5.33147	9.74202e-08	4.00334e-07
YCR036W	Sbay_3.70	509.25	-1.38119	0.128649	-10.7361	6.89143e-27	1.4528e-25
YLR077W	Sbay_10.160	670.25	-0.206534	0.121605	-1.6984	0.0894319	0.12812
YDR119W-A	Sbay_2.280	436.002	1.05925	0.21274	4.97909	6.38837e-07	2.35801e-06
YNL219C	Sbay_14.123	827.167	-0.11996	0.115095	-1.04227	0.297287	0.368746
YDR037W	Sbay_2.195	1542.23	-1.46844	0.114414	-12.8345	1.05125e-37	3.61044e-36
YGR040W	Sbay_7.325	252.167	0.946836	0.182554	5.1866	2.14163e-07	8.40764e-07
YER178W	Sbay_5.314	3832.92	-0.0379911	0.0871915	-0.435721	0.663039	0.7239
YOR186W	Sbay_8.242	32.4994	1.92492	0.474158	4.05966	4.91444e-05	0.000134991
YML041C	Sbay_13.119	229.917	-0.0295507	0.17948	-0.164647	0.869222	0.895646
YLR057W	Sbay_10.141	417.333	-0.047679	0.138499	-0.344255	0.730655	0.782403
YOL038W	Sbay_15.131	2161	0.0970019	0.103129	0.94059	0.346915	0.420449
YCR004C	Sbay_3.24	2556.1	0.0770342	0.104422	0.737718	0.460686	0.537784
YJL091C	Sbay_6.165	190	1.16616	0.192393	6.06133	1.35003e-09	6.98728e-09
YLR320W	Sbay_10.416	241	0.162252	0.179619	0.903312	0.36636	0.441334
YHR005C	Sbay_8.59	29.8333	-0.324956	0.433103	-0.750298	0.453075	0.530155
YPR135W	Sbay_16.463	292.721	-0.163389	0.172411	-0.947669	0.343298	0.417529
YAR008W	Sbay_1.76	167.401	0.785454	0.222184	3.53516	0.000407527	0.000957172
YHR121W	Sbay_15.318	941.167	0.243249	0.121935	1.99491	0.0460524	0.0709109
YDL179W	Sbay_4.68	236.546	-0.957226	0.199447	-4.79939	1.59147e-06	5.54662e-06
YHR034C	Sbay_15.221	187.267	0.0334815	0.2054	0.163007	0.870513	0.896798
YMR231W	Sbay_13.415	457.062	1.06828	0.137231	7.78454	6.99674e-15	5.95814e-14
YOL070C	Sbay_15.95	533.839	-0.10421	0.128868	-0.808659	0.418711	0.495423
YOL138C	Sbay_15.22	437.93	0.725029	0.154539	4.69155	2.71139e-06	9.03682e-06
YOR188W	Sbay_8.244	362.194	0.354293	0.156156	2.26883	0.0232784	0.0386064
YJL085W	Sbay_6.158	459.833	1.24947	0.137471	9.08895	9.99997e-20	1.27734e-18
YDR533C	Sbay_2.715	387.281	-9.72467	0.873813	-11.129	9.06368e-29	2.0984e-27
YOL148C	Sbay_15.12	452.155	0.544806	0.133406	4.08381	4.43024e-05	0.000122274
YLR452C	Sbay_10.571	122.974	-0.0156392	0.245609	-0.0636753	0.949229	0.95903
YLR341W	Sbay_10.438	6.53979	1.39026	0.991421	1.40229	0.160827	0.215684
YNR054C	Sbay_14.409	344.176	-0.428497	0.162026	-2.64462	0.00817817	0.0149866
YBL029C-A	Sbay_2.90	910.28	2.02962	0.176292	11.5129	1.13638e-30	2.86992e-29
YDR130C	Sbay_2.293	201.167	-0.938737	0.193205	-4.85876	1.18121e-06	4.18649e-06
YIL015W	Sbay_9.186	16.4122	-2.04022	0.614502	-3.32011	0.000899806	0.00199675
YEL030W	Sbay_5.39	106.589	0.143866	0.235741	0.61027	0.541683	0.614294
YPR082C	Sbay_16.412	213.75	-0.0847434	0.1994	-0.424992	0.670842	0.73088
YBR291C	Sbay_4.551	357.5	1.06611	0.170344	6.25857	3.88522e-10	2.14121e-09
YNL002C	Sbay_14.346	1696.08	0.380646	0.108413	3.51106	0.000446319	0.00104121
YDR183C-A	Sbay_2.351	0.235983	0.25641	4.39665	0.0583195	0.953494	0.962964
YAR015W	Sbay_1.83	4903.42	0.480599	0.100401	4.7868	1.69459e-06	5.87837e-06
YPR046W	Sbay_16.375	87.8333	0.491604	0.268389	1.83168	0.0669984	0.0989614
YML114C	Sbay_13.29	401.113	0.249894	0.146499	1.70578	0.0880498	0.126524
YDR020C	Sbay_2.170	161.585	0.236569	0.208341	1.13549	0.256171	0.324579
YGR053C	Sbay_7.335	130.926	0.0534415	0.234884	0.227523	0.820017	0.857035
YJL093C	Sbay_6.167	349.464	-0.379835	0.14638	-2.59486	0.00946293	0.0171052
YNL081C	Sbay_14.258	1502.75	-0.110378	0.117038	-0.94309	0.345635	0.419443
YNR001C	Sbay_14.350	3447.58	-0.263276	0.135617	-1.94132	0.0522189	0.0793459
YOR347C	Sbay_8.401	491	-0.341234	0.143975	-2.3701	0.0177833	0.0303469
YNL082W	Sbay_14.257	216.656	-0.29115	0.192051	-1.51601	0.129517	0.178495
YKL115C	Sbay_11.109	2.95579	2.48149	1.64506	1.50845	0.13144	0.180713
YLL051C	Sbay_10.20	443.349	0.743085	0.165419	4.49215	7.05083e-06	2.21475e-05
YDR395W	Sbay_2.572	1355.08	0.523641	0.109946	4.7627	1.91016e-06	6.55166e-06
YOR279C	Sbay_8.327	134.542	-0.0416313	0.222769	-0.186881	0.851754	0.8815
YPL264C	Sbay_16.41	33.25	0.66151	0.398144	1.66148	0.0966165	0.137388
YGR008C	Sbay_7.291	5040.25	-1.26346	0.0947595	-13.3333	1.48176e-40	5.82154e-39
YKL211C	Sbay_11.9	910.167	0.0602671	0.112827	0.534157	0.593233	0.661187
YGL060W	Sbay_7.211	261.522	-0.0719138	0.161792	-0.444482	0.656694	0.718484
YNL311C	Sbay_14.28	149.26	-0.458978	0.21974	-2.08874	0.0367315	0.0580231
YPR161C	Sbay_16.491	475.134	-0.383103	0.140706	-2.72272	0.00647478	0.0121484
YLR297W	Sbay_10.391	164.405	0.857029	0.22261	3.84992	0.000118158	0.000305164
YLL002W	Sbay_10.74	178.076	0.930002	0.215594	4.31367	1.60564e-05	4.81044e-05
YJL030W	Sbay_12.50	271.667	0.30364	0.157612	1.92651	0.0540412	0.0818032
YLR424W	Sbay_10.540	198.913	0.203452	0.18389	1.10637	0.268564	0.33797
YLR408C	Sbay_10.524	105.246	1.20004	0.256479	4.6789	2.88418e-06	9.57578e-06
YGL123W	Sbay_7.145	34551.2	-0.497387	0.0762884	-6.51983	7.0387e-11	4.15275e-10
YKR066C	Sbay_11.301	1725.29	-0.705496	0.103614	-6.80886	9.83773e-12	6.25994e-11
YDR079W	Sbay_2.238	600.121	0.707331	0.144583	4.8922	9.97133e-07	3.59356e-06
YGR248W	Sbay_7.543	1756	0.459555	0.130451	3.52282	0.000426975	0.000998683
YNL154C	Sbay_14.185	2424.21	0.631571	0.09554	6.61054	3.82916e-11	2.33075e-10
YBR086C	Sbay_4.333	1183.5	0.0684058	0.108565	0.630088	0.528637	0.601156
YER043C	Sbay_5.143	9828.67	0.0643466	0.0905363	0.710727	0.477253	0.553244
YBR074W	Sbay_4.313	773.186	0.685135	0.124081	5.52166	3.35817e-08	1.4525e-07
YGR191W	Sbay_7.485	1162.67	0.271341	0.127501	2.12814	0.0333257	0.0532759
YOR150W	Sbay_8.201	1912.42	0.180084	0.101862	1.76792	0.0770741	0.112372
YMR106C	Sbay_13.283	146.932	-0.701768	0.230019	-3.05091	0.00228149	0.00471763
YDR055W	Sbay_2.212	1932.47	-0.464357	0.112992	-4.10963	3.96294e-05	0.000110316
YBL061C	Sbay_2.55	504.977	0.350107	0.134252	2.60783	0.00911171	0.0165453
YJR110W	Sbay_12.201	295.984	0.0287608	0.156242	0.184079	0.853951	0.883421
YPR054W	Sbay_16.382	7.68822	2.029	0.957968	2.11802	0.0341731	0.0544628
YMR140W	Sbay_13.320	852.127	0.732495	0.121875	6.0102	1.8529e-09	9.42075e-09
YLR095C	Sbay_10.179	668.83	0.156987	0.118708	1.32246	0.186015	0.244841
YBR034C	Sbay_4.266	2084.75	0.605789	0.148413	4.08178	4.46928e-05	0.000123286
YGR065C	Sbay_7.346	161.667	-0.270218	0.216352	-1.24897	0.211675	0.273957
YPL054W	Sbay_16.259	22.4232	1.9438	0.560494	3.46801	0.000524323	0.00120743
YLR040C	Sbay_10.125	4.04443	-1.81321	1.22697	-1.47779	0.139464	0.190131
YCR091W	Sbay_3.128	323.42	0.177338	0.153075	1.15851	0.246656	0.313904
YLR401C	Sbay_10.517	1110.44	0.773678	0.126947	6.09447	1.09801e-09	5.75178e-09
YDR244W	Sbay_2.410	655.222	-0.671612	0.136668	-4.91419	8.91487e-07	3.23078e-06
YLR304C	Sbay_10.399	8995.91	0.1553	0.0845362	1.83708	0.0661985	0.0978915
YKL018W	Sbay_11.210	277.917	0.483414	0.188735	2.56134	0.010427	0.018685
YDL088C	Sbay_4.156	752.553	0.453451	0.11673	3.8846	0.000102497	0.000267784
YDL137W	Sbay_4.107	4056.83	0.416013	0.100279	4.14857	3.34556e-05	9.46541e-05
YJR063W	Sbay_12.152	490.25	0.279892	0.138103	2.02669	0.0426938	0.0664097
YBR018C	Sbay_2.147	260.583	3.89284	0.271119	14.3584	9.43434e-47	4.70447e-45
YMR161W	Sbay_13.340	403.995	-0.234644	0.137719	-1.70379	0.088421	0.126987
YDL157C	Sbay_4.88	349.026	-0.345797	0.170042	-2.0336	0.0419921	0.0654359
YDR233C	Sbay_2.399	5289.48	0.0413203	0.106141	0.389297	0.697056	0.754054
YJL184W	Sbay_6.264	289.282	0.56205	0.161499	3.48021	0.000501022	0.00115737
YER025W	Sbay_5.120	3694.83	0.218009	0.0879343	2.47922	0.0131669	0.0230598
YDR527W	Sbay_2.709	564.833	0.0657738	0.132326	0.497058	0.619148	0.684774
YKL146W	Sbay_11.79	632.271	0.508772	0.124737	4.07877	4.52741e-05	0.00012469
YKL139W	Sbay_11.86	355.37	0.351389	0.149156	2.35586	0.0184801	0.0313914
YCR059C	Sbay_3.94	309.802	-0.186174	0.163496	-1.13871	0.254826	0.323125
YIL036W	Sbay_9.164	751.605	-0.675045	0.111051	-6.07872	1.21148e-09	6.30749e-09
YDL197C	Sbay_4.51	351.575	-1.07196	0.145395	-7.37272	1.67183e-13	1.26571e-12
YER078C	Sbay_5.191	752.288	-0.0298405	0.116395	-0.256372	0.797663	0.838003
YER130C	Sbay_5.251	1254.43	0.85803	0.162964	5.26515	1.40072e-07	5.63549e-07
YDR115W	Sbay_2.274	1556.75	0.0405221	0.109593	0.369752	0.711567	0.766713
YDR428C	Sbay_2.604	237	-1.05731	0.182417	-5.79614	6.7859e-09	3.21679e-08
YIL077C	Sbay_9.120	581.211	-0.0693179	0.149125	-0.464832	0.642052	0.705142
YGR071C	Sbay_7.354	187.564	-0.141061	0.204629	-0.689351	0.490602	0.565643
YER165W	Sbay_5.299	9444.5	0.160793	0.0781561	2.05733	0.0396548	0.0621674
YML038C	Sbay_13.121	491.19	-1.49833	0.153029	-9.79118	1.22848e-22	1.99715e-21
YCL059C	Sbay_3.153	1155	0.172758	0.116028	1.48893	0.136506	0.186688
YJL181W	Sbay_6.262	112.302	-0.537278	0.258387	-2.07935	0.0375848	0.0592446
YKR071C	Sbay_11.306	701.5	-0.0720486	0.128168	-0.56214	0.574021	0.643369
YKR031C	Sbay_11.264	546.034	-0.267169	0.121984	-2.1902	0.0285098	0.0463776
YDR489W	Sbay_2.665	198.942	0.257287	0.189087	1.36068	0.173616	0.230333
YGR196C	Sbay_7.490	481.275	0.24701	0.131151	1.88339	0.0596469	0.0892209
YNL101W	Sbay_14.238	569.909	0.266447	0.131657	2.0238	0.0429906	0.0667712
YMR244W	Sbay_13.429	18.7641	3.5922	0.740356	4.85198	1.22235e-06	4.30938e-06
YMR091C	Sbay_13.268	701.406	0.564652	0.135437	4.16913	3.05771e-05	8.71279e-05
YLR011W	Sbay_10.91	95.1956	-1.68169	0.259111	-6.49023	8.57079e-11	5.01672e-10
YPR049C	Sbay_16.378	177.773	-1.48241	0.195428	-7.58546	3.31303e-14	2.6804e-13
YDL057W	Sbay_4.192	82.0833	-1.09973	0.269017	-4.08796	4.35186e-05	0.000120431
YPR014C	Sbay_16.336	0.0538891	0.373343	4.39665	0.0849154	0.932329	0.94527
YGR257C	Sbay_7.555	608.083	-0.663345	0.152844	-4.34001	1.42473e-05	4.30826e-05
YNL070W	Sbay_14.270	1061.42	1.24869	0.10759	11.606	3.84382e-31	1.00677e-29
YHR150W	Sbay_15.349	188.167	-1.88785	0.254316	-7.42324	1.14293e-13	8.78916e-13
YLR263W	Sbay_10.361	94.2093	0.0397736	0.301341	0.131989	0.894993	0.916374
YPL235W	Sbay_16.71	1656.49	0.649378	0.107201	6.05759	1.38177e-09	7.13729e-09
YDL008W	Sbay_4.239	191.417	-0.495259	0.192565	-2.57191	0.0101141	0.0181808
YBL050W	Sbay_2.68	1359.56	0.532362	0.108848	4.89087	1.00391e-06	3.61548e-06
YJR086W	Sbay_12.174	9.99359	4.33055	1.04797	4.13231	3.59132e-05	0.000101001
YGR237C	Sbay_7.529	1374.04	0.90956	0.112611	8.07702	6.63664e-16	6.28059e-15
YLR031W	Sbay_10.111	7.28433	0.937281	0.863828	1.08503	0.277907	0.347787
YDL159W	Sbay_4.87	313.291	-0.119428	0.155881	-0.766149	0.443587	0.521643
YBL087C	Sbay_2.30	6682.21	-0.160596	0.0878983	-1.82707	0.0676892	0.099868
YJR014W	Sbay_12.99	1683.57	0.0766497	0.108222	0.708265	0.478781	0.55458
YJL132W	Sbay_6.212	103.546	0.851123	0.242905	3.50393	0.000458438	0.00106517
YGL190C	Sbay_7.74	721.937	0.658544	0.126825	5.19255	2.07432e-07	8.16195e-07
YBR110W	Sbay_4.357	517.083	0.542441	0.134499	4.03305	5.50587e-05	0.00014973
YDR144C	Sbay_2.305	588.368	-0.523196	0.166532	-3.14171	0.00167966	0.00354238
YOR180C	Sbay_8.236	50.6667	-6.9615	1.55131	-4.4875	7.20648e-06	2.26228e-05
YPL018W	Sbay_16.300	97.3519	0.174907	0.252396	0.692988	0.488317	0.563678
YGL018C	Sbay_7.261	279.917	-0.370878	0.164029	-2.26105	0.0237561	0.0392604
YMR075W	Sbay_13.252	341.929	-0.114665	0.150336	-0.76272	0.445631	0.523333
YGR202C	Sbay_7.496	1364.72	-0.429802	0.140943	-3.04948	0.00229241	0.00473644
YKL120W	Sbay_11.104	335.333	0.326592	0.168831	1.93444	0.0530595	0.080411
YJR041C	Sbay_12.123	330.507	-0.00744103	0.167338	-0.044467	0.964532	0.972407
YKL175W	Sbay_11.48	762.423	0.441825	0.131355	3.3636	0.000769341	0.00172569
YKR028W	Sbay_11.261	1161.17	-0.382677	0.102708	-3.72588	0.000194633	0.000482257
YFL046W	Sbay_6.7	322.583	0.507788	0.157816	3.21759	0.00129271	0.00278289
YDR379W	Sbay_2.552	628.488	0.192451	0.123442	1.55904	0.118987	0.165897
YMR179W	Sbay_13.360	167.343	-0.340277	0.224847	-1.51337	0.130186	0.179227
YLR381W	Sbay_10.498	104.467	-0.864035	0.272361	-3.17239	0.00151188	0.00322128
YNL176C	Sbay_14.165	621.967	-0.149288	0.120421	-1.23972	0.215077	0.277737
YHR169W	Sbay_15.369	267.427	-0.958193	0.198179	-4.835	1.33149e-06	4.67192e-06
YMR286W	Sbay_13.476	1326.95	0.550978	0.101812	5.41171	6.24254e-08	2.61501e-07
YDL175C	Sbay_4.72	359.928	0.409384	0.153003	2.67566	0.0074583	0.0137843
YHR104W	Sbay_15.300	3238.33	-0.548101	0.10617	-5.1625	2.43678e-07	9.51592e-07
YDR447C	Sbay_2.622	10365.1	0.587534	0.0849501	6.91623	4.63829e-12	3.04098e-11
YGL009C	Sbay_7.272	1502.5	-0.0385754	0.158904	-0.242759	0.808192	0.846681
YKL168C	Sbay_11.54	460.397	0.0404358	0.154461	0.261787	0.793485	0.834181
YBL042C	Sbay_2.75	181.008	-0.231175	0.238699	-0.968478	0.332806	0.406388
YDL102W	Sbay_4.144	383.75	-0.634903	0.151694	-4.18541	2.84649e-05	8.16928e-05
YLR237W	Sbay_10.332	1189.63	2.96714	0.163082	18.1942	5.73723e-74	6.91936e-72
YJR009C	Sbay_12.93	46096.4	-1.27192	0.0869281	-14.6319	1.75821e-48	9.59798e-47
YER092W	Sbay_5.210	486.087	-0.373755	0.13879	-2.69297	0.00708195	0.0131544
YIL121W	Sbay_9.71	82.7026	4.30571	0.407475	10.5668	4.24698e-26	8.70548e-25
YLR214W	Sbay_10.308	421.442	-1.20522	0.152474	-7.90442	2.69182e-15	2.40271e-14
YDL160C-A	Sbay_4.84	60	0.706988	0.313287	2.25668	0.0240283	0.0395841
YPL021W	Sbay_16.297	1.25573	-1.51716	2.36652	-0.641093	0.521462	0.594745
YIR010W	Sbay_9.221	226.004	-0.0194664	0.180917	-0.107599	0.914314	0.931741
YDR331W	Sbay_2.501	369	0.121665	0.148179	0.821063	0.41161	0.488469
YNL298W	Sbay_14.42	360.783	-0.350994	0.157778	-2.2246	0.0261079	0.0427789
YLR234W	Sbay_10.330	57.978	1.36487	0.347231	3.93073	8.46869e-05	0.000223732
YML056C	Sbay_13.103	5467.29	0.785944	0.0891696	8.81404	1.20716e-18	1.43916e-17
YKR044W	Sbay_11.279	137.304	1.09719	0.22466	4.88379	1.04064e-06	3.73222e-06
YJL127C	Sbay_6.206	248.167	-1.06969	0.178103	-6.00602	1.90128e-09	9.64776e-09
YGL029W	Sbay_7.249	415.917	-0.911194	0.186864	-4.87625	1.0812e-06	3.86165e-06
YFL004W	Sbay_6.55	1047.89	0.627367	0.114944	5.45803	4.81441e-08	2.04484e-07
YKL149C	Sbay_11.77	329.917	1.56953	0.176477	8.89368	5.91166e-19	7.23063e-18
YGL183C	Sbay_7.80	24.2551	2.98964	0.666859	4.48317	7.35435e-06	2.30451e-05
YER139C	Sbay_5.267	253.667	0.082803	0.168095	0.492597	0.622297	0.687084
YDL128W	Sbay_4.117	1157.5	1.12401	0.110189	10.2007	1.96849e-24	3.64592e-23
YLR433C	Sbay_10.550	430.183	0.789552	0.145436	5.42887	5.67111e-08	2.38527e-07
YMR068W	Sbay_13.243	166.909	-0.645078	0.194465	-3.3172	0.000909254	0.00201599
YPL098C	Sbay_16.213	690.917	0.231556	0.133436	1.73534	0.0826807	0.119471
YMR153W	Sbay_13.331	458.364	-0.485881	0.143213	-3.39272	0.000692024	0.00156376
YGR239C	Sbay_7.531	127.052	0.666606	0.242546	2.74837	0.00598918	0.0113316
YIR015W	Sbay_9.226	204.749	0.717893	0.175905	4.08115	4.4814e-05	0.000123554
YDL040C	Sbay_4.211	1771.69	0.325135	0.0974689	3.33578	0.000850603	0.00189161
YPL096W	Sbay_16.216	392.944	0.493731	0.162538	3.03763	0.00238443	0.00490312
YER032W	Sbay_5.129	181.167	-0.442006	0.201732	-2.19105	0.0284482	0.0463065
YJR070C	Sbay_12.160	1870.06	-0.563324	0.0972752	-5.79103	6.99558e-09	3.31014e-08
YKL185W	Sbay_11.39	1022.64	0.452039	0.117322	3.85297	0.000116694	0.000301983
YDL097C	Sbay_4.149	2545.8	0.285219	0.0909413	3.1363	0.00171092	0.00360099
YPR003C	Sbay_16.322	251.471	0.376509	0.16437	2.29061	0.0219857	0.0367207
YGL005C	Sbay_7.277	291.887	-1.36932	0.163571	-8.37142	5.69295e-17	5.81174e-16
YGR262C	Sbay_7.560	447.583	-0.715138	0.1537	-4.65282	3.27432e-06	1.07609e-05
YPL160W	Sbay_16.150	3210.09	0.222241	0.086747	2.56195	0.0104087	0.0186716
YIR024C	Sbay_9.240	502.561	0.44944	0.130348	3.448	0.000564752	0.00129307
YMR133W	Sbay_13.313	4.37506	-0.447473	1.08184	-0.413622	0.679151	0.738793
YOL016C	Sbay_15.155	9817.16	-2.33486	0.127113	-18.3683	2.35467e-75	3.13111e-73
YDR202C	Sbay_2.369	508.583	-0.498011	0.126863	-3.92558	8.65203e-05	0.000228343
YJL052W	Sbay_6.127	12147.2	-1.94565	0.333448	-5.83495	5.38069e-09	2.58852e-08
YMR029C	Sbay_13.197	590.333	-0.264476	0.123606	-2.13967	0.0323811	0.0519098
YBR066C	Sbay_4.305	382.333	2.22575	0.174142	12.7812	2.08701e-37	7.07403e-36
YLR104W	Sbay_10.189	342.018	0.853823	0.165497	5.15914	2.48084e-07	9.67341e-07
YKL159C	Sbay_11.67	381.71	2.04757	0.199173	10.2804	8.63879e-25	1.62322e-23
YGR215W	Sbay_7.509	841.917	-0.424343	0.110275	-3.84804	0.000119065	0.000307201
YDR253C	Sbay_2.419	100.417	-0.228078	0.271609	-0.839728	0.401061	0.477699
YDR059C	Sbay_2.218	283.505	1.13592	0.162595	6.98621	2.82403e-12	1.90447e-11
YOR335C	Sbay_8.385	2963.33	-0.408631	0.0893128	-4.57528	4.75587e-06	1.53765e-05
YDR368W	Sbay_2.540	1390.67	0.536116	0.100002	5.36106	8.27349e-08	3.42429e-07
YHR192W	Sbay_15.395	400.007	0.476816	0.139543	3.41697	0.000633222	0.00143984
YCR082W	Sbay_3.119	285.5	0.113431	0.167014	0.679169	0.497031	0.571657
YNL085W	Sbay_14.254	1876.8	1.2629	0.0950179	13.2912	2.60333e-40	1.00006e-38
YDR300C	Sbay_2.466	727.667	-0.089254	0.125523	-0.711056	0.477049	0.553215
YJL158C	Sbay_11.63	1348.87	-6.23608	0.233303	-26.7295	2.14018e-157	1.009e-154
YGL087C	Sbay_7.182	599.239	0.303999	0.123447	2.46259	0.0137939	0.0240778
YNL301C	Sbay_14.38	4167.22	1.10665	0.0897607	12.3289	6.3293e-35	1.94223e-33
YPL052W	Sbay_16.263	177.167	2.1356	0.228407	9.35	8.76508e-21	1.22292e-19
YIL003W	Sbay_9.204	164.377	-0.515875	0.205426	-2.51125	0.0120306	0.0212647
YPR080W	Sbay_16.409	26335.2	0.671809	0.0886023	7.5823	3.39484e-14	2.73805e-13
YBR245C	Sbay_4.505	972.25	0.958171	0.119469	8.02022	1.05555e-15	9.79262e-15
YPL155C	Sbay_16.155	305.909	-0.953902	0.161982	-5.88895	3.88661e-09	1.9015e-08
YBR163W	Sbay_4.415	289.75	0.102513	0.163858	0.625622	0.531563	0.604139
YDR465C	Sbay_2.641	557.81	-1.10033	0.140087	-7.85465	4.00889e-15	3.51184e-14
YLR276C	Sbay_10.374	959.167	-0.693229	0.122525	-5.65784	1.53293e-08	6.9552e-08
YKL186C	Sbay_11.38	701.985	-0.295045	0.125708	-2.34707	0.0189217	0.032026
YPL084W	Sbay_16.228	944.5	0.0820664	0.121441	0.675771	0.499186	0.573758
YDL222C	Sbay_4.22	437.596	1.02153	0.15237	6.70424	2.02461e-11	1.25294e-10
YKL079W	Sbay_11.145	366.942	-0.209776	0.147492	-1.42229	0.154942	0.208817
YFR044C	Sbay_12.13	3654.16	0.0166074	0.0922266	0.180071	0.857096	0.886145
YBR210W	Sbay_4.468	242.75	0.91728	0.192316	4.76966	1.84541e-06	6.34214e-06
YPL103C	Sbay_16.209	713.667	-0.341542	0.120911	-2.82473	0.00473202	0.00912617
YIL103W	Sbay_9.92	341.871	0.866047	0.15307	5.65786	1.53275e-08	6.9552e-08
YBR269C	Sbay_4.530	259.25	-0.901701	0.173192	-5.20636	1.92584e-07	7.60657e-07
YFR033C	Sbay_6.109	2324.75	-0.565577	0.106368	-5.31715	1.05407e-07	4.30426e-07
YDR283C	Sbay_2.449	459.4	0.503088	0.135131	3.72298	0.000196887	0.000487378
YJR096W	Sbay_12.184	620.5	0.248612	0.15171	1.63873	0.10127	0.143455
YOR361C	Sbay_8.418	4689.87	-0.081347	0.0859387	-0.946571	0.343857	0.418013
YLR398C	Sbay_10.515	857.912	0.0654412	0.115675	0.565732	0.571576	0.641322
YBR192W	Sbay_4.446	1165.92	-0.315706	0.107528	-2.93602	0.00332454	0.00659062
YNL188W	Sbay_14.154	142.091	0.211404	0.231296	0.913998	0.360718	0.435144
YJR116W	Sbay_12.207	95.3174	-0.667802	0.267482	-2.49663	0.0125381	0.0220715
YKL027W	Sbay_11.198	444.224	-0.533741	0.154639	-3.45154	0.000557403	0.00127737
YGR143W	Sbay_7.431	820.229	1.1372	0.148048	7.68132	1.57459e-14	1.30236e-13
YER007C-A	Sbay_5.95	935.022	-0.474687	0.112846	-4.20649	2.59373e-05	7.48112e-05
YGR112W	Sbay_7.397	1067.92	0.120774	0.104952	1.15075	0.249834	0.31748
YNR022C	Sbay_14.377	1452.17	-0.542327	0.0989416	-5.48128	4.22256e-08	1.80529e-07
YGL229C	Sbay_7.30	343.718	-0.157012	0.149241	-1.05207	0.292767	0.364098
YOR130C	Sbay_8.182	193.5	-1.05145	0.202844	-5.18353	2.1772e-07	8.54082e-07
YBR125C	Sbay_4.371	547.5	-0.349652	0.129539	-2.6992	0.00695062	0.0129289
YDR409W	Sbay_2.586	336.308	-0.0169487	0.164329	-0.103139	0.917853	0.934011
YLR356W	Sbay_10.457	263.081	-0.104818	0.190363	-0.550621	0.581893	0.651068
YBR221C	Sbay_4.478	3529.21	-0.481076	0.0967095	-4.97445	6.54342e-07	2.40839e-06
YAL005C	Sbay_1.63	16905.7	1.17222	0.0966861	12.124	7.88523e-34	2.24686e-32
YJL094C	Sbay_6.168	827.035	-0.123092	0.121263	-1.01509	0.310064	0.382673
YGR074W	Sbay_7.356	382.201	0.179844	0.158639	1.13367	0.256932	0.325225
YKL057C	Sbay_11.169	514.667	-0.0432051	0.133936	-0.32258	0.747013	0.796302
YGL098W	Sbay_7.168	465.583	0.917377	0.164107	5.59011	2.26932e-08	1.00468e-07
YJR056C	Sbay_12.144	227.48	0.505881	0.184251	2.74562	0.00603975	0.0114189
YDR097C	Sbay_2.256	404.836	-0.739131	0.148914	-4.96346	6.92481e-07	2.53795e-06
YLR404W	Sbay_10.520	121.583	0.435113	0.224071	1.94185	0.052155	0.0793184
YJL121C	Sbay_6.200	1069.33	-0.0928489	0.114363	-0.811877	0.416862	0.493532
YGR161C	Sbay_7.451	1862.67	1.03446	0.115076	8.98935	2.48686e-19	3.09278e-18
YGR186W	Sbay_7.479	1565.45	0.124345	0.0968015	1.28453	0.198955	0.259372
YIR001C	Sbay_9.210	328.833	-0.313071	0.155823	-2.00914	0.0445223	0.0687795
YOR047C	Sbay_8.99	429.317	-1.3989	0.177298	-7.89011	3.01928e-15	2.66292e-14
YPL254W	Sbay_16.52	381.226	0.597302	0.157361	3.79575	0.000147199	0.000374202
YDL213C	Sbay_4.34	913.187	0.470611	0.111244	4.23046	2.33217e-05	6.77192e-05
YIL132C	Sbay_9.57	45.3333	-1.48096	0.388896	-3.80812	0.000140026	0.000357722
YPL246C	Sbay_16.61	753.729	-0.59329	0.117612	-5.04447	4.54785e-07	1.7066e-06
YIL145C	Sbay_9.44	963.917	0.702971	0.132908	5.28914	1.22894e-07	4.97912e-07
YKL195W	Sbay_11.28	5595.3	0.0054375	0.0885361	0.0614156	0.951028	0.960661
YGL216W	Sbay_7.44	227.083	0.321347	0.183574	1.7505	0.0800314	0.116128
YDR317W	Sbay_2.486	4.4988	0.460411	1.30978	0.351518	0.7252	0.777769
YFL031W	Sbay_6.27	1791.07	-0.0306814	0.0958238	-0.320185	0.748828	0.797359
YDR478W	Sbay_2.652	137.685	0.182458	0.213179	0.855893	0.392057	0.468697
YHR064C	Sbay_15.253	5577.42	-0.283494	0.0846639	-3.34846	0.000812621	0.00181336
YKL015W	Sbay_11.213	268.181	0.794368	0.17366	4.57428	4.77862e-06	1.54369e-05
YKL197C	Sbay_11.25	237.456	-2.02749	0.179061	-11.3229	1.01041e-29	2.40367e-28
YMR020W	Sbay_13.187	1166.32	1.03052	0.137962	7.46959	8.04432e-14	6.27336e-13
YJR089W	Sbay_12.176	339.952	0.555596	0.149072	3.72703	0.000193747	0.000480751
YJL145W	Sbay_6.225	801.26	1.43258	0.132955	10.7749	4.52132e-27	9.72927e-26
YDR377W	Sbay_2.550	1125.17	0.637454	0.105176	6.06083	1.35425e-09	7.00214e-09
YIR007W	Sbay_9.218	369.568	0.881046	0.15213	5.79139	6.98082e-09	3.30617e-08
YJL201W	Sbay_6.281	231.991	-0.316237	0.193485	-1.63442	0.10217	0.144492
YDR152W	Sbay_2.314	838.478	-0.456474	0.126756	-3.60119	0.000316759	0.000755966
YLR153C	Sbay_10.252	4065.33	0.263032	0.0960164	2.73945	0.00615426	0.0116082
YLR146W-A	Sbay_10.244	64.275	1.69256	0.314795	5.37671	7.58591e-08	3.15481e-07
YNL126W	Sbay_14.213	103.874	-0.324355	0.272941	-1.18837	0.234688	0.300146
YBR132C	Sbay_4.381	398.256	1.01238	0.14898	6.79539	1.0802e-11	6.84846e-11
YKL040C	Sbay_11.185	754.863	0.157212	0.115659	1.35928	0.174059	0.230744
YPL192C	Sbay_16.114	8.35005	-0.617011	0.807881	-0.76374	0.445022	0.522856
YLR249W	Sbay_10.346	50568.5	-0.37197	0.0789057	-4.71411	2.42771e-06	8.16334e-06
YNL004W	Sbay_14.344	1451.8	0.0535318	0.109523	0.488773	0.625002	0.68919
YOR327C	Sbay_8.378	911.379	-0.560565	0.111987	-5.00564	5.56769e-07	2.07131e-06
YIR025W	Sbay_9.241	175	-0.409872	0.201187	-2.03727	0.0416228	0.0649387
YKR053C	Sbay_11.287	132.021	1.45539	0.304539	4.77898	1.76184e-06	6.08619e-06
YOR378W	Sbay_8.435	7.91667	-0.898327	0.951975	-0.943646	0.345351	0.419337
YGL158W	Sbay_7.106	125.99	-1.25363	0.288939	-4.33872	1.43313e-05	4.32608e-05
YDR336W	Sbay_2.506	267.075	0.8308	0.182263	4.55826	5.15792e-06	1.65526e-05
YCR020C-A	Sbay_3.50	131.514	-1.03012	0.225263	-4.57297	4.80862e-06	1.5518e-05
YMR230W	Sbay_13.414	6748.29	0.138883	0.0881992	1.57466	0.115336	0.161308
YOL139C	Sbay_15.21	6149.83	0.448704	0.0836647	5.36312	8.17962e-08	3.38914e-07
YNL067W-A	Sbay_14.273	0.247436	-0.854688	4.39665	-0.194395	0.845866	0.876806
YIL092W	Sbay_9.107	131.2	-0.790103	0.24063	-3.28348	0.00102535	0.00224936
YBR207W	Sbay_4.461	1012.29	-0.0027128	0.106491	-0.0254745	0.979676	0.985186
YPR133C	Sbay_16.460	1450.27	0.393131	0.0959528	4.09713	4.18298e-05	0.000115881
YPL222W	Sbay_16.84	386.105	-0.365086	0.154692	-2.36008	0.018271	0.031087
YOL073C	Sbay_15.92	395.25	0.384406	0.152097	2.52738	0.0114917	0.0204096
YLR321C	Sbay_10.417	474.28	-0.0865962	0.133319	-0.649541	0.515988	0.589279
YMR065W	Sbay_13.239	97.4337	0.415752	0.257031	1.61752	0.105766	0.149212
YOR266W	Sbay_8.315	513.497	0.528298	0.126316	4.18233	2.88531e-05	8.26698e-05
YPL203W	Sbay_16.104	1424.79	0.164201	0.122671	1.33854	0.18072	0.238659
YNR055C	Sbay_14.414	834.556	0.355047	0.11672	3.04185	0.00235127	0.0048426
YDR532C	Sbay_2.714	136.896	-0.336393	0.220143	-1.52807	0.126495	0.175089
YHL040C	Sbay_8.12	271.145	-2.85321	0.192763	-14.8016	1.42964e-49	7.97218e-48
YGR052W	Sbay_7.334	612.583	0.398076	0.131651	3.02372	0.00249689	0.00511734
YCL012C	Sbay_3.7	211.333	0.102651	0.1717	0.597855	0.549937	0.622022
YDR184C	Sbay_2.353	185.465	-0.872195	0.220651	-3.95282	7.72369e-05	0.00020541
YNR011C	Sbay_14.364	257.99	-0.710927	0.164666	-4.31738	1.57889e-05	4.73849e-05
YNL167C	Sbay_14.171	757.34	0.0716485	0.120378	0.595197	0.551712	0.623622
YKL210W	Sbay_11.10	3614.83	-0.316135	0.0879552	-3.59427	0.000325301	0.000774924
YNL221C	Sbay_14.121	611.56	-0.424151	0.130482	-3.25064	0.00115144	0.00250267
YLR194C	Sbay_10.290	3198.33	0.279016	0.112705	2.47563	0.0133002	0.0232473
YOR278W	Sbay_8.326	329.386	1.0161	0.146712	6.9258	4.33509e-12	2.86027e-11
YER146W	Sbay_5.274	466.167	-0.00778323	0.135953	-0.0572496	0.954346	0.963637
YOR365C	Sbay_8.422	7.25302	-1.28927	0.891028	-1.44695	0.147911	0.200122
YNR002C	Sbay_14.355	85.5	-0.335867	0.295603	-1.13621	0.255867	0.324274
YLR426W	Sbay_10.543	172.078	0.257232	0.196132	1.31153	0.18968	0.248823
YGL061C	Sbay_7.210	207.697	0.508252	0.19335	2.62866	0.0085721	0.0156523
YDR394W	Sbay_2.571	2192.58	0.0904165	0.0925649	0.97679	0.328673	0.401815
YKR102W	Sbay_11.340	230.508	-0.0256139	0.195854	-0.130781	0.895949	0.917171
YNL173C	Sbay_14.167	1418.68	0.0379717	0.129564	0.293074	0.769465	0.813381
YPR145W	Sbay_16.474	3506.25	1.8932	0.412201	4.59291	4.37115e-06	1.41857e-05
YDR399W	Sbay_2.576	2686.13	-1.40451	0.12129	-11.5798	5.21618e-31	1.35256e-29
YOR353C	Sbay_8.407	390.151	-0.118014	0.140423	-0.840422	0.400672	0.477345
YOR087W	Sbay_8.141	929.012	2.00013	0.126857	15.7668	5.26702e-56	3.84715e-54
YLR186W	Sbay_10.282	895.167	0.175134	0.111723	1.56757	0.116981	0.163258
YKL127W	Sbay_13.282	15173.4	5.52708	0.142392	38.816	0	0
YHR159W	Sbay_15.358	260.167	-0.2407	0.165932	-1.4506	0.146893	0.198966
YPL132W	Sbay_16.178	806.33	-0.178769	0.111111	-1.60892	0.107633	0.151475
YIL114C	Sbay_9.80	298.436	-0.254615	0.17683	-1.43989	0.149899	0.202495
YPL100W	Sbay_16.211	636.629	-0.263258	0.127927	-2.05788	0.0396015	0.0621026
YGL234W	Sbay_7.25	8333.17	-0.196841	0.100137	-1.96572	0.0493312	0.0754888
YOL055C	Sbay_15.110	237	-1.00513	0.176472	-5.6957	1.2287e-08	5.63397e-08
YPR093C	Sbay_16.420	151.67	0.0194591	0.210614	0.092392	0.926387	0.940165
YJL089W	Sbay_6.161	30.9094	1.4558	0.445677	3.26649	0.0010889	0.00238171
YNL302C	Sbay_14.37	9134.08	-0.392936	0.0865416	-4.54042	5.61418e-06	1.7895e-05
YOL082W	Sbay_15.84	1074.19	-1.24424	0.134036	-9.28288	1.64958e-20	2.24533e-19
YAL029C	Sbay_1.37	839.417	-0.638847	0.123162	-5.18703	2.13672e-07	8.39472e-07
YJL052C-A	Sbay_6.128	0.295264	0.704078	4.36884	0.161159	0.871968	0.898118
YKL112W	Sbay_11.112	678.184	0.849743	0.126983	6.69179	2.20464e-11	1.3611e-10
YOR148C	Sbay_8.199	228.349	0.0552863	0.180132	0.306921	0.758904	0.805408
YNL108C	Sbay_14.230	444.583	0.394045	0.138388	2.8474	0.00440778	0.00858061
YDR421W	Sbay_2.598	258.791	-1.18126	0.170682	-6.92081	4.49074e-12	2.95545e-11
YLR226W	Sbay_10.320	232.917	0.650707	0.188054	3.46021	0.000539761	0.00123943
YHL035C	Sbay_8.16	458.86	-0.524025	0.137631	-3.80747	0.000140395	0.000358487
YMR301C	Sbay_13.491	439.069	0.11216	0.152076	0.737526	0.460802	0.537784
YGL171W	Sbay_7.92	709.962	0.0229989	0.136874	0.168029	0.86656	0.893613
YDR294C	Sbay_2.460	1006.92	-0.772387	0.133098	-5.80315	6.5079e-09	3.09633e-08
YFR002W	Sbay_6.65	914.667	0.305721	0.110031	2.7785	0.00546113	0.0104238
YBR267W	Sbay_4.528	554.989	0.211824	0.139661	1.5167	0.129343	0.178302
YBR285W	Sbay_4.545	44.947	1.17137	0.356001	3.29036	0.00100061	0.00219972
YGR161W-C	Sbay_7.452	223.993	0.22241	0.173088	1.28495	0.198809	0.259247
YPR194C	Sbay_16.526	5.5	3.43783	1.36243	2.52331	0.0116256	0.0206262
YGR089W	Sbay_7.371	530.085	-0.329064	0.133764	-2.46003	0.0138926	0.0242419
YBL029W	Sbay_2.91	354.048	3.10038	0.447083	6.93468	4.07139e-12	2.70003e-11
YDR325W	Sbay_2.496	253.54	0.383554	0.176187	2.17697	0.0294828	0.0477954
YBR181C	Sbay_4.432	9907.21	-2.07001	0.0840671	-24.6233	7.10551e-134	2.45661e-131
YFR022W	Sbay_6.94	225.019	-0.324771	0.186502	-1.74138	0.0816171	0.118165
YNL131W	Sbay_14.208	3324.25	0.217992	0.107245	2.03265	0.0420874	0.0655604
YEL020W-A	Sbay_5.69	3088.72	0.15025	0.0885051	1.69765	0.0895744	0.128219
YNL124W	Sbay_14.216	470.002	0.528808	0.141454	3.73837	0.000185215	0.000461347
YJL073W	Sbay_6.148	237.492	1.04977	0.175761	5.97273	2.3332e-09	1.17248e-08
YBL005W	Sbay_2.121	438.984	0.718115	0.140684	5.10444	3.31771e-07	1.27166e-06
YOR078W	Sbay_8.127	452.667	-0.541514	0.139128	-3.8922	9.93387e-05	0.000259793
YNL048W	Sbay_14.292	621.75	0.427056	0.131269	3.25328	0.00114079	0.00248161
YOL125W	Sbay_15.35	344.832	-0.342077	0.152419	-2.24432	0.0248115	0.0408225
YLR371W	Sbay_10.487	674.458	-0.0528697	0.120678	-0.438104	0.661311	0.722317
YDL196W	Sbay_4.52	1.35225	-0.535895	2.01294	-0.266225	0.790066	0.830923
YNL327W	Sbay_14.14	2430.24	-0.761557	0.0958546	-7.94492	1.94322e-15	1.7711e-14
YLR130C	Sbay_10.223	841.046	-1.62032	0.129161	-12.5449	4.23949e-36	1.36559e-34
YER022W	Sbay_5.117	528.589	0.734681	0.163043	4.50605	6.60442e-06	2.08083e-05
YBR057C	Sbay_4.294	467.171	-0.399941	0.137558	-2.90743	0.00364417	0.0071749
YNR059W	Sbay_14.418	565.25	0.0248796	0.125289	0.198578	0.842593	0.874788
YDR041W	Sbay_2.198	2532.67	0.931145	0.0923412	10.0837	6.51972e-24	1.16591e-22
YGL047W	Sbay_7.228	242.128	-0.672907	0.173454	-3.87946	0.00010469	0.000272826
YOL114C	Sbay_15.45	86	0.919603	0.279336	3.29211	0.000994396	0.00218792
YKR070W	Sbay_11.305	496	-0.835835	0.131472	-6.35749	2.05075e-10	1.15726e-09
YNL059C	Sbay_14.281	987.333	-0.0522359	0.106619	-0.489932	0.624182	0.688642
YMR205C	Sbay_13.387	8967.5	-0.14099	0.0806113	-1.74901	0.080289	0.116372
YIL094C	Sbay_9.105	1665.5	-1.61284	0.134592	-11.9832	4.35414e-33	1.20752e-31
YNL183C	Sbay_14.158	578.851	-0.755651	0.13276	-5.69185	1.2567e-08	5.7573e-08
YCR005C	Sbay_3.25	2722.33	0.498129	0.112541	4.42621	9.59054e-06	2.95887e-05
YJL185C	Sbay_6.265	90.6667	-0.0944793	0.247932	-0.381069	0.703152	0.759298
YER164W	Sbay_5.298	1051.67	-0.767319	0.108084	-7.0993	1.25392e-12	8.71692e-12
YBL101C	Sbay_2.16	1014.91	0.654296	0.130964	4.99602	5.85264e-07	2.16798e-06
YNL237W	Sbay_14.107	72.5155	-2.63568	0.322603	-8.17006	3.08249e-16	2.99359e-15
YML017W	Sbay_13.142	732.939	1.8475	0.123819	14.921	2.40631e-50	1.37133e-48
YIL016W	Sbay_9.185	398.833	0.333611	0.144187	2.31374	0.0206822	0.0347563
YLR032W	Sbay_10.112	297.905	0.0323011	0.156132	0.206883	0.836101	0.869988
YOL047C	Sbay_15.123	4.1708	2.20206	1.31172	1.67875	0.0931999	0.132894
YPR141C	Sbay_16.469	137.01	-0.126515	0.222812	-0.567812	0.570163	0.639875
YPL011C	Sbay_16.307	352.32	0.565337	0.153658	3.67919	0.000233976	0.000570743
YBL051C	Sbay_2.67	1656.21	0.908515	0.100975	8.99744	2.31034e-19	2.88015e-18
YGR281W	Sbay_7.577	2025.78	2.65496	0.142599	18.6183	2.28159e-77	3.19792e-75
YDL185C-A	Sbay_4.62	0.171946	-0.160074	4.39665	-0.0364081	0.970957	0.97736
YLR089C	Sbay_10.173	1586.92	-0.373979	0.101087	-3.69958	0.000215955	0.000530778
YPL161C	Sbay_16.149	316.579	0.977549	0.156464	6.24776	4.16378e-10	2.28501e-09
YMR081C	Sbay_13.260	1458.52	0.624455	0.151606	4.11893	3.80641e-05	0.000106358
YPR015C	Sbay_16.338	31.6667	-1.58579	0.417434	-3.79889	0.000145345	0.000369852
YMR022W	Sbay_13.189	549.417	-0.364465	0.185187	-1.96809	0.0490574	0.0750921
YDR488C	Sbay_2.664	129.723	-1.01521	0.267352	-3.79726	0.000146305	0.000372113
YNL115C	Sbay_14.224	946.843	0.346824	0.133651	2.59501	0.00945893	0.0171039
YGR236C	Sbay_7.528	54.903	0.773388	0.31466	2.45785	0.0139771	0.0243811
YOL021C	Sbay_15.147	1277.33	0.13459	0.105966	1.27013	0.204037	0.26513
YGR256W	Sbay_7.554	418.583	1.16036	0.139319	8.32876	8.16934e-17	8.25852e-16
YEL042W	Sbay_5.27	1070.08	0.00435381	0.105431	0.0412955	0.96706	0.974009
YLR113W	Sbay_10.202	3832.25	-0.367301	0.0969464	-3.7887	0.000151438	0.000384414
YBL027W	Sbay_2.93	20341.8	0.741812	0.0751264	9.87418	5.38719e-23	8.86919e-22
YHL013C	Sbay_8.39	304.264	-0.308378	0.15869	-1.94328	0.0519823	0.0791486
YOL060C	Sbay_15.105	1438.59	-0.0844303	0.104755	-0.805976	0.420257	0.496911
YML129C	Sbay_13.13	1616.96	-0.838184	0.0972676	-8.6173	6.85535e-18	7.54816e-17
YGR009C	Sbay_7.292	832.984	0.406583	0.112817	3.60391	0.00031347	0.00074915
YNL208W	Sbay_14.135	6865.67	-0.719949	0.0872769	-8.24902	1.59693e-16	1.57746e-15
YMR185W	Sbay_13.366	231.583	0.10747	0.201055	0.534532	0.592973	0.66104
YCL005W	Sbay_3.14	182.927	-0.0283572	0.186383	-0.152145	0.879073	0.904717
YGL105W	Sbay_7.162	4227.61	-0.096885	0.100143	-0.967463	0.333313	0.406911
YBR097W	Sbay_4.344	256.5	0.225746	0.164675	1.37086	0.170419	0.226818
YLR014C	Sbay_10.94	118.362	-0.560682	0.244052	-2.29739	0.0215968	0.0361169
YDL076C	Sbay_4.172	502.33	-0.258706	0.138815	-1.86367	0.0623675	0.093022
YOR137C	Sbay_8.189	390.375	0.583821	0.165128	3.53555	0.000406922	0.000956183
YDR120C	Sbay_2.281	779.809	-0.300079	0.128757	-2.33058	0.0197755	0.0333298
YER126C	Sbay_5.247	1325.25	-0.463204	0.108969	-4.2508	2.13006e-05	6.23391e-05
YPR186C	Sbay_16.518	168.18	0.226969	0.200305	1.13312	0.257164	0.325361
YOR113W	Sbay_8.166	289.19	-0.715572	0.174361	-4.10396	4.06137e-05	0.000112859
YGR194C	Sbay_7.488	1076.03	-0.0727418	0.122523	-0.593697	0.552715	0.624619
YDR486C	Sbay_2.660	444.583	-0.48923	0.145621	-3.3596	0.000780552	0.00174706
YJL192C	Sbay_6.272	915.296	0.094183	0.119542	0.787868	0.430774	0.507956
YHR117W	Sbay_15.314	1033.13	0.424073	0.12856	3.29864	0.000971544	0.0021431
YBR040W	Sbay_4.272	1.66537	1.58091	2.18475	0.723613	0.469303	0.545819
YOL130W	Sbay_15.29	810.824	-1.38828	0.124865	-11.1182	1.02281e-28	2.35746e-27
YDR030C	Sbay_2.181	162.384	0.83016	0.216231	3.83923	0.000123421	0.000317806
YOR014W	Sbay_15.191	1096.79	0.339248	0.113468	2.9898	0.00279157	0.00565216
YOR238W	Sbay_8.288	251.506	-0.21672	0.172586	-1.25572	0.209216	0.271113
YNL325C	Sbay_14.16	175.672	-0.33414	0.210542	-1.58704	0.112503	0.157686
YPL274W	Sbay_16.31	585.953	0.58024	0.152317	3.80942	0.000139294	0.000356026
YNL257C	Sbay_14.85	367.756	-0.156376	0.155294	-1.00696	0.313952	0.386644
YBL047C	Sbay_2.70	3143.41	-0.0217618	0.0846317	-0.257136	0.797074	0.837614
YNL293W	Sbay_14.46	337.164	-0.583317	0.148971	-3.91563	9.01693e-05	0.00023749
YEL051W	Sbay_5.18	2456.48	0.45832	0.0970847	4.72082	2.34891e-06	7.93581e-06
YCR045C	Sbay_3.84	7.36341	2.69776	0.996633	2.70687	0.00679207	0.0126749
YLL023C	Sbay_10.51	1168.98	0.289807	0.12614	2.2975	0.0215905	0.0361169
YKL203C	Sbay_11.20	470.156	-0.395941	0.141381	-2.80053	0.00510193	0.00979586
YOL004W	Sbay_15.171	1122.07	-0.503022	0.103682	-4.85158	1.22483e-06	4.31518e-06
YOR275C	Sbay_8.324	503.924	-0.532404	0.137738	-3.86535	0.000110931	0.000288364
YPL209C	Sbay_16.97	50.1516	0.783608	0.379178	2.0666	0.0387722	0.0609681
YGR014W	Sbay_7.296	748.968	2.05826	0.163998	12.5505	3.94866e-36	1.27986e-34
YOR005C	Sbay_15.180	320.861	-1.45048	0.153397	-9.45568	3.20934e-21	4.66208e-20
YGL050W	Sbay_7.224	348	-0.588491	0.148234	-3.97	7.18712e-05	0.000192225
YNL181W	Sbay_14.160	679.5	0.199901	0.119577	1.67173	0.0945778	0.134636
YER179W	Sbay_5.315	11.9963	-0.414837	0.686306	-0.604449	0.545545	0.617999
YDL036C	Sbay_4.215	319.743	0.122164	0.150974	0.809174	0.418415	0.495185
YMR032W	Sbay_13.201	305.932	0.194215	0.158529	1.22511	0.220534	0.283865
YMR150C	Sbay_13.329	308.091	0.453485	0.15345	2.95526	0.00312406	0.0062409
YFL007W	Sbay_6.53	1108.4	-0.127293	0.104359	-1.21975	0.222558	0.286256
YML059C	Sbay_13.98	692.526	-0.655606	0.140968	-4.65073	3.30755e-06	1.08632e-05
YDL129W	Sbay_4.116	212.04	0.464344	0.183776	2.52668	0.0115146	0.0204433
YDR063W	Sbay_2.222	797.583	0.0856984	0.114885	0.745952	0.455697	0.532622
YKR045C	Sbay_11.280	100.635	-0.454769	0.238031	-1.91054	0.0560633	0.084445
YLR388W	Sbay_10.505	3809.44	0.226941	0.0855217	2.6536	0.00796377	0.0146247
YGR238C	Sbay_7.530	336.201	1.539	0.164641	9.34759	8.96679e-21	1.24336e-19
YCR012W	Sbay_3.38	79206.8	-0.276417	0.0765353	-3.61163	0.000304276	0.000729869
YML121W	Sbay_13.22	642.827	0.232856	0.123408	1.88689	0.0591758	0.0886774
YER035W	Sbay_5.133	305.627	-0.458968	0.163229	-2.8118	0.00492655	0.00948017
YDR201W	Sbay_2.368	184.672	-0.23911	0.189826	-1.25963	0.207804	0.269687
YOR065W	Sbay_8.115	3777.01	0.073843	0.0872935	0.845916	0.3976	0.474121
YDR254W	Sbay_2.420	112.667	-0.935448	0.246972	-3.78767	0.000152065	0.000385817
YPR128C	Sbay_16.455	692.88	0.688	0.129079	5.33007	9.81751e-08	4.03117e-07
YGR263C	Sbay_7.561	379.083	1.84054	0.17541	10.4928	9.32124e-26	1.85923e-24
YKL156W	Sbay_11.70	3350.26	-0.446588	0.0919141	-4.85875	1.18127e-06	4.18649e-06
YMR310C	Sbay_13.503	450.25	1.72538	0.155769	11.0765	1.63044e-28	3.74135e-27
YHR191C	Sbay_15.394	103.25	-0.356218	0.240029	-1.48406	0.137792	0.188198
YDL110C	Sbay_4.136	2093.33	0.842509	0.1088	7.74365	9.66006e-15	8.13264e-14
YDL098C	Sbay_4.148	134.173	0.0708892	0.229217	0.309266	0.757119	0.803935
YDR301W	Sbay_2.467	458.354	0.432243	0.148394	2.9128	0.00358202	0.00705789
YJL053W	Sbay_6.129	714.505	-0.161718	0.115752	-1.3971	0.162384	0.217575
YPR104C	Sbay_16.431	325.853	0.212776	0.155294	1.37015	0.170642	0.227026
YMR069W	Sbay_13.244	27.8411	-0.688359	0.512006	-1.34443	0.178808	0.236255
YPL129W	Sbay_16.181	1064.24	0.227417	0.106736	2.13065	0.0331183	0.0529608
YOR245C	Sbay_8.295	456.25	0.51622	0.137969	3.74157	0.000182877	0.000456181
YGR214W	Sbay_7.508	13618.6	-0.451398	0.0808717	-5.58165	2.38246e-08	1.05153e-07
YPR151C	Sbay_16.479	688.326	0.221672	0.147615	1.50169	0.133177	0.182568
YOR283W	Sbay_8.331	408.75	-0.201523	0.140515	-1.43418	0.151521	0.204578
YPR002W	Sbay_16.320	112.712	0.700913	0.27618	2.53788	0.0111525	0.0198684
YGL006W	Sbay_7.276	3669.03	0.210293	0.0992553	2.11871	0.0341149	0.0544035
YPL006W	Sbay_16.312	683.667	0.150125	0.138671	1.0826	0.278988	0.34897
YOR293W	Sbay_8.342	14061.3	-0.259804	0.0765114	-3.39562	0.000684737	0.00155068
YKR005C	Sbay_11.236	185.07	2.2381	0.207896	10.7655	5.01155e-27	1.07396e-25
YCR083W	Sbay_3.120	444.635	-0.0735265	0.130307	-0.564255	0.572581	0.642172
YKR067W	Sbay_11.302	1656.91	1.05768	0.143637	7.36357	1.79057e-13	1.35363e-12
YMR143W	Sbay_13.322	11627.2	-0.149387	0.0786587	-1.89918	0.0575411	0.0864951
YER084W	Sbay_5.197	18.1593	2.43051	0.671966	3.61702	0.000298019	0.000716518
YML028W	Sbay_13.131	18347.9	0.036502	0.0944198	0.386593	0.699058	0.755746
YCR063W	Sbay_3.102	67.25	1.14354	0.319503	3.57912	0.000344747	0.000818616
YLL001W	Sbay_10.75	1243.08	0.737254	0.104476	7.05672	1.7048e-12	1.17101e-11
YOR168W	Sbay_8.223	3223.62	0.062704	0.0915981	0.684556	0.493624	0.568622
YDR052C	Sbay_2.210	568.005	-0.554236	0.1316	-4.21152	2.53658e-05	7.32853e-05
YHL006C	Sbay_8.48	59.6667	0.0771199	0.327333	0.2356	0.813743	0.851679
YMR043W	Sbay_13.213	730.741	-0.259763	0.119902	-2.16646	0.0302759	0.0489282
YPR173C	Sbay_16.506	1847.33	0.292627	0.091043	3.21417	0.00130824	0.00281166
YGR249W	Sbay_7.544	2441.34	1.26004	0.145792	8.64267	5.4915e-18	6.11136e-17
YCL047C	Sbay_3.166	229.833	0.592632	0.184056	3.21985	0.00128259	0.00276226
YJL031C	Sbay_12.49	392.757	-0.189766	0.144248	-1.31555	0.188326	0.247443
YML077W	Sbay_13.75	210	0.368536	0.181452	2.03104	0.0422511	0.0657605
YER068W	Sbay_5.180	670.847	-0.141047	0.125641	-1.12262	0.261597	0.330004
YER013W	Sbay_5.103	286.954	-0.513495	0.171129	-3.00063	0.00269419	0.00548786
YDR223W	Sbay_2.390	104.586	-2.71818	0.280581	-9.68767	3.40202e-22	5.33017e-21
YMR269W	Sbay_13.453	273	-1.34433	0.189138	-7.10764	1.18042e-12	8.23911e-12
YKL053C-A	Sbay_11.173	1311.11	-0.149097	0.113585	-1.31264	0.189303	0.248475
YGL122C	Sbay_7.146	945.679	0.491667	0.110881	4.43419	9.242e-06	2.85632e-05
YDL021W	Sbay_4.227	1074.83	2.31597	0.135349	17.111	1.22861e-65	1.15847e-63
YLR143W	Sbay_10.239	496.737	0.520833	0.135594	3.84113	0.00012247	0.000315515
YLR043C	Sbay_10.127	2341.42	-0.689726	0.0997573	-6.91404	4.71031e-12	3.0843e-11
YJL008C	Sbay_12.71	2220	0.264662	0.0933814	2.83421	0.00459395	0.00889961
YDL018C	Sbay_4.231	212.75	-1.47849	0.213289	-6.93185	4.15362e-12	2.75104e-11
YPL176C	Sbay_16.133	763.57	0.350514	0.129319	2.71046	0.00671891	0.0125475
YLL042C	Sbay_10.27	40.75	-0.190451	0.359312	-0.530044	0.596081	0.663879
YML060W	Sbay_13.97	144.495	0.309512	0.229217	1.3503	0.17692	0.234237
YJR062C	Sbay_12.151	306.479	-0.956743	0.158822	-6.02398	1.70179e-09	8.69505e-09
YBR239C	Sbay_4.498	191.526	-0.172964	0.199449	-0.867209	0.385827	0.462102
YBR035C	Sbay_4.267	1199.75	-0.18416	0.102777	-1.79185	0.0731575	0.107325
YPR160W	Sbay_16.490	12309	0.460688	0.0833924	5.52434	3.30723e-08	1.43294e-07
YMR191W	Sbay_13.372	413.75	0.399253	0.145746	2.73938	0.00615551	0.0116082
YBL060W	Sbay_2.56	580.043	2.90067	0.191204	15.1706	5.54022e-52	3.38019e-50
YML035C	Sbay_13.124	1461.77	-0.95068	0.115399	-8.23822	1.74787e-16	1.72328e-15
YNL277W	Sbay_14.66	336	1.2231	0.202717	6.03356	1.60389e-09	8.21917e-09
YLR154C	Sbay_10.253	172.712	-0.541183	0.200748	-2.69584	0.00702117	0.0130508
YCL010C	Sbay_3.9	345.919	-0.732557	0.154411	-4.74421	2.09325e-06	7.13245e-06
YDL136W	Sbay_4.108	4872.09	-0.39251	0.0880566	-4.45747	8.29314e-06	2.57998e-05
YNL144C	Sbay_14.195	1126.31	0.674077	0.157953	4.26757	1.9761e-05	5.82606e-05
YBR019C	Sbay_2.148	148.083	5.54149	0.363285	15.2538	1.55285e-52	9.82085e-51
YPR171W	Sbay_16.504	253.714	-0.545885	0.175365	-3.11285	0.00185289	0.00387717
YKL056C	Sbay_11.170	13376.8	-0.206766	0.0777985	-2.65771	0.00786726	0.0144731
YAL060W	Sbay_1.7	5360	-1.57786	0.335951	-4.6967	2.64394e-06	8.8461e-06
YKL065W-A	Sbay_11.159	15.4357	0.88199	0.580852	1.51844	0.128903	0.177743
YFL025C	Sbay_6.33	254.167	0.46227	0.169209	2.73195	0.00629604	0.0118516
YKL009W	Sbay_11.219	1675.58	-0.0517835	0.102509	-0.505161	0.613446	0.679638
YIL144W	Sbay_9.45	273.787	-0.175888	0.162589	-1.08179	0.279345	0.349333
YPL270W	Sbay_16.35	661.613	-0.33724	0.126644	-2.6629	0.00774707	0.0142672
YOR124C	Sbay_8.176	856.821	-0.742851	0.106693	-6.96253	3.34211e-12	2.24219e-11
YOR332W	Sbay_8.382	4206.83	-0.334123	0.0940573	-3.55234	0.000381827	0.00090212
YKR056W	Sbay_11.290	595.523	0.109397	0.13656	0.801087	0.423081	0.500023
YCL057C-A	Sbay_3.155	581.667	-1.49672	0.12276	-12.1922	3.41955e-34	1.0076e-32
YJR057W	Sbay_12.146	368.36	-0.487844	0.149694	-3.25893	0.00111832	0.0024368
YKR098C	Sbay_11.335	353.618	-0.265352	0.159955	-1.65892	0.097132	0.138007
YHR164C	Sbay_15.363	210.077	-0.991598	0.180813	-5.48411	4.15557e-08	1.77959e-07
YKL150W	Sbay_11.76	6215	-0.172441	0.118897	-1.45034	0.146963	0.198995
YIL133C	Sbay_9.56	8840.93	-0.214226	0.079326	-2.70058	0.00692184	0.0128985
YHR063C	Sbay_15.252	566.459	-0.0639001	0.121896	-0.52422	0.600126	0.667292
YJL200C	Sbay_6.280	726.833	-0.940136	0.129148	-7.2795	3.35052e-13	2.45421e-12
YBR148W	Sbay_4.397	71.3577	1.70316	0.320547	5.3133	1.07659e-07	4.38585e-07
YGL211W	Sbay_7.50	516.667	0.515774	0.137984	3.73793	0.000185542	0.000461516
YDR316W	Sbay_2.484	1837.67	0.591149	0.0950426	6.21983	4.97702e-10	2.70554e-09
YMR093W	Sbay_13.270	622.583	0.462411	0.131757	3.50959	0.000448802	0.00104559
YPL033C	Sbay_16.283	1.16578	0.81824	2.41358	0.339015	0.734598	0.785328
YPL113C	Sbay_16.196	536.321	4.73201	0.226195	20.92	3.51967e-97	7.02039e-95
YCR076C	Sbay_3.114	350.088	0.292741	0.150722	1.94225	0.0521064	0.0792678
YLR377C	Sbay_10.494	9.66667	-1.32622	0.746658	-1.77621	0.0756982	0.110614
YNL107W	Sbay_14.231	203.411	-0.609428	0.191588	-3.18094	0.001468	0.00313295
YIR036C	Sbay_9.252	445.167	-1.51772	0.132088	-11.4902	1.47785e-30	3.68469e-29
YIL009C-A	Sbay_9.195	142.244	0.608253	0.227901	2.66893	0.0076093	0.0140434
YBL063W	Sbay_2.54	147.165	-0.286194	0.220699	-1.29676	0.194713	0.254609
YDL210W	Sbay_4.38	9	1.82694	0.792389	2.30561	0.0211325	0.0354556
YDR479C	Sbay_2.653	524.551	-0.450782	0.123113	-3.66152	0.000250719	0.000610437
YAL059W	Sbay_1.8	370.631	0.0829327	0.162585	0.510088	0.609989	0.676954
YMR033W	Sbay_13.202	747.333	0.00319562	0.132513	0.0241154	0.980761	0.985929
YKL194C	Sbay_11.29	917.167	-0.227951	0.109067	-2.09	0.0366176	0.0578608
YFR023W	Sbay_6.95	44.1792	7.40753	1.24837	5.93376	2.96078e-09	1.46934e-08
YKL096W	Sbay_11.129	2743.87	-1.8405	0.127148	-14.4753	1.73511e-47	8.99828e-46
YDR089W	Sbay_2.250	484.5	-1.66136	0.200158	-8.30024	1.03899e-16	1.03819e-15
YKL014C	Sbay_11.214	655.631	0.372823	0.129719	2.87407	0.00405219	0.00792408
YGL160W	Sbay_7.103	482.456	-1.27566	0.14256	-8.94822	3.61253e-19	4.47126e-18
YMR021C	Sbay_13.188	331.814	-0.301812	0.191789	-1.57367	0.115565	0.161541
YNR036C	Sbay_14.392	1429.25	-0.938334	0.107028	-8.76722	1.83129e-18	2.12939e-17
YPL216W	Sbay_16.90	232.162	1.27363	0.180083	7.07244	1.5223e-12	1.05122e-11
YJR040W	Sbay_12.122	450.224	0.323315	0.13247	2.44067	0.0146601	0.0254016
YPR119W	Sbay_16.448	423.172	1.06655	0.172515	6.18236	6.31513e-10	3.4044e-09
YJR015W	Sbay_12.100	340.652	-3.34885	0.22233	-15.0625	2.85862e-51	1.6472e-49
YLR207W	Sbay_10.301	636.117	0.688679	0.126055	5.46332	4.67306e-08	1.9897e-07
YDR378C	Sbay_2.551	640.982	0.393385	0.131288	2.99635	0.00273231	0.00555242
YOL122C	Sbay_15.38	617.78	-2.69152	0.156049	-17.2479	1.15969e-66	1.20283e-64
YBL086C	Sbay_2.31	882.925	0.237782	0.114195	2.08224	0.0373205	0.0588996
YKL176C	Sbay_11.47	686.769	-0.208329	0.136341	-1.52801	0.126511	0.175089
YKR029C	Sbay_11.262	501.581	1.68992	0.15635	10.8086	3.13484e-27	6.77387e-26
YIR027C	Sbay_9.243	8.09671	1.7974	0.936079	1.92014	0.0548406	0.082844
YDR249C	Sbay_2.415	295.813	3.2494	0.202791	16.0234	8.77367e-58	6.79108e-56
YGL191W	Sbay_7.73	1803.17	0.294896	0.108673	2.7136	0.00665564	0.0124338
YJL104W	Sbay_6.180	1092.33	-0.511108	0.127813	-3.99888	6.36435e-05	0.000171546
YPR010C-A	Sbay_16.333	556.503	0.890663	0.147399	6.04253	1.5172e-09	7.79801e-09
YOR296W	Sbay_8.345	201.414	-0.119399	0.181988	-0.656082	0.511771	0.585236
YFL041W	Sbay_6.16	920.667	0.777641	0.120271	6.46574	1.00801e-10	5.83432e-10
YJL168C	Sbay_6.249	437.033	-0.815687	0.158417	-5.149	2.61884e-07	1.01733e-06
YDR145W	Sbay_2.306	1040.74	0.333591	0.117903	2.82935	0.00466423	0.00902226
YFL009W	Sbay_6.51	503.461	0.198563	0.12815	1.54945	0.121273	0.168658
YDL174C	Sbay_4.73	3423.97	0.0630389	0.11842	0.532333	0.594495	0.66231
YER091C	Sbay_5.207	5408.67	1.14483	0.138024	8.29443	1.09109e-16	1.08815e-15
YJL062W	Sbay_6.138	417.167	0.455768	0.144214	3.16036	0.00157575	0.00334364
YMR194C-B	Sbay_13.376	45.5404	-1.44088	0.349751	-4.11972	3.79334e-05	0.00010605
YDL103C	Sbay_4.143	909.5	-1.11534	0.122133	-9.13213	6.71645e-20	8.75163e-19
YLR303W	Sbay_10.397	2184	0.931612	0.120584	7.72584	1.11121e-14	9.29472e-14
YJR008W	Sbay_12.92	397	-0.472026	0.148843	-3.1713	0.00151757	0.00323209
YDL203C	Sbay_4.45	341.328	0.221619	0.147452	1.50299	0.132843	0.182255
YFR024C-A	Sbay_6.96	1699.83	0.361429	0.102325	3.53217	0.000412167	0.000967631
YML031W	Sbay_13.128	648.614	-0.205782	0.120961	-1.70123	0.0888998	0.127604
YLR215C	Sbay_10.310	217.869	0.844223	0.184839	4.56733	4.93975e-06	1.59004e-05
YML082W	Sbay_13.68	518.123	-0.0281768	0.141718	-0.198823	0.842402	0.874788
YLR363W-A	Sbay_10.466	218.083	0.933314	0.195146	4.78265	1.72995e-06	5.98501e-06
YKL100C	Sbay_11.124	940.083	-1.09356	0.114391	-9.55982	1.17957e-21	1.76799e-20
YDR216W	Sbay_2.383	393.546	-0.016559	0.16874	-0.0981334	0.921826	0.936887
YIL120W	Sbay_9.70	44.7145	1.73421	0.499458	3.47217	0.000516266	0.00118994
YKL130C	Sbay_11.94	233.083	-0.219121	0.170036	-1.28867	0.197512	0.257749
YPL131W	Sbay_16.179	30213.9	-0.0301958	0.0760674	-0.396962	0.691396	0.74954
YOR106W	Sbay_8.158	321.248	0.547488	0.179099	3.05691	0.00223633	0.00463053
YPL138C	Sbay_16.172	352.167	0.589504	0.161239	3.6561	0.000256082	0.000621432
YNL021W	Sbay_14.326	661.083	1.26354	0.134499	9.39444	5.75241e-21	8.21819e-20
YNL236W	Sbay_14.108	497.605	0.359863	0.142322	2.52852	0.0114545	0.0203575
YOL054W	Sbay_15.115	293.339	0.442286	0.160444	2.75664	0.0058398	0.0110773
YFR001W	Sbay_6.64	723.41	-0.533178	0.152521	-3.49575	0.000472723	0.00109493
YOR023C	Sbay_8.77	538.282	-0.596862	0.134209	-4.44727	8.69704e-06	2.69754e-05
YBR220C	Sbay_4.477	448.302	1.08611	0.146385	7.41953	1.17537e-13	9.01697e-13
YIL019W	Sbay_9.181	345.521	-0.224294	0.149791	-1.49738	0.134295	0.183907
YIL115C	Sbay_9.79	1202.89	0.366826	0.0987121	3.71612	0.000202303	0.000499117
YKR013W	Sbay_11.245	546.198	-0.612229	0.193127	-3.17008	0.00152395	0.00324301
YPL007C	Sbay_16.311	211.167	0.052769	0.176995	0.298138	0.765598	0.809965
YNL182C	Sbay_14.159	595.138	0.767141	0.138866	5.52433	3.30742e-08	1.43294e-07
YGL233W	Sbay_7.26	357.654	-0.088852	0.144646	-0.614271	0.539036	0.61156
YCL027W	Sbay_3.186	15.4997	-0.0992218	0.579799	-0.171131	0.864121	0.891629
YGR113W	Sbay_7.398	377.22	-0.35099	0.145474	-2.41274	0.0158332	0.0272793
YLR318W	Sbay_10.414	72.9269	0.141256	0.285284	0.495143	0.6205	0.685683
YLR319C	Sbay_10.415	445.386	-0.0762127	0.133742	-0.569849	0.56878	0.639062
YKL033W-A	Sbay_11.190	865.083	0.730406	0.108226	6.7489	1.48972e-11	9.29688e-11
YMR036C	Sbay_13.205	192.761	0.169295	0.205226	0.824921	0.409416	0.486534
YMR235C	Sbay_13.419	1900.77	0.642786	0.117865	5.45359	4.93622e-08	2.09315e-07
YOL053W	Sbay_15.116	535.444	0.386698	0.127951	3.02224	0.0025091	0.0051391
YHR029C	Sbay_15.215	128.917	-1.02894	0.23983	-4.29028	1.78449e-05	5.29426e-05
YPL091W	Sbay_16.221	1628.67	-0.600767	0.100356	-5.98635	2.14606e-09	1.08158e-08
YPR164W	Sbay_16.494	317.76	0.256223	0.151698	1.68903	0.0912133	0.130312
YIL031W	Sbay_9.168	270.577	0.481486	0.180392	2.66911	0.00760522	0.0140408
YDR295C	Sbay_2.461	405.333	-0.278036	0.137628	-2.02019	0.0433636	0.0672901
YAL033W	Sbay_1.33	156.281	-0.839529	0.220581	-3.80599	0.000141239	0.000360287
YLR203C	Sbay_10.297	2963	-0.0719788	0.0878245	-0.819576	0.412458	0.489363
YGR155W	Sbay_7.446	5945.92	-0.0860553	0.104272	-0.825293	0.409205	0.486394
YGL208W	Sbay_7.53	472.571	-1.64465	0.161458	-10.1863	2.28353e-24	4.21437e-23
YFR049W	Sbay_12.8	377.25	-0.295326	0.139051	-2.12388	0.0336805	0.0537934
YBR284W	Sbay_4.544	259.333	-1.96805	0.182846	-10.7634	5.12427e-27	1.0936e-25
YMR195W	Sbay_13.377	808.239	1.39688	0.170065	8.21381	2.1427e-16	2.09661e-15
YDR108W	Sbay_2.268	249.439	-0.00962161	0.169937	-0.0566187	0.954849	0.963957
YNR049C	Sbay_14.404	361.5	0.598721	0.158208	3.78439	0.000154087	0.000389993
YDR192C	Sbay_2.361	260.814	-0.0060233	0.164472	-0.0366221	0.970786	0.97736
YOL112W	Sbay_15.48	434.417	-0.39636	0.147695	-2.68364	0.00728256	0.0134932
YKR004C	Sbay_11.235	81.033	0.541146	0.312415	1.73214	0.0832494	0.120092
YML109W	Sbay_13.35	218.722	-0.349615	0.185381	-1.88593	0.059304	0.0888105
YJR159W	Sbay_6.12	23.7378	3.48136	0.556662	6.254	4.00081e-10	2.20257e-09
YOL083W	Sbay_15.83	160.831	0.52407	0.205404	2.55141	0.0107288	0.0191728
YLR335W	Sbay_10.432	1529.69	-0.258879	0.0988953	-2.61771	0.00885222	0.0161192
YNL251C	Sbay_14.91	1220.3	-0.318813	0.105689	-3.01653	0.00255687	0.00523439
YJR102C	Sbay_12.191	241.417	0.388622	0.172082	2.25835	0.0239239	0.0394623
YPL089C	Sbay_16.223	772.753	0.28333	0.120596	2.34941	0.0188034	0.0318571
YHR134W	Sbay_15.331	314.652	0.283486	0.159815	1.77384	0.0760896	0.111093
YOR020C	Sbay_8.73	4582.17	-0.943366	0.0847151	-11.1358	8.40326e-29	1.95423e-27
YBL028C	Sbay_2.92	788.667	1.44385	0.158238	9.12451	7.20598e-20	9.29608e-19
YBL004W	Sbay_2.123	883.179	-0.372411	0.114694	-3.247	0.00116629	0.00253282
YBR186W	Sbay_4.437	1.93636	0.806688	1.61853	0.498408	0.618197	0.683867
YPR053C	Sbay_16.381	31.1033	1.11951	0.443979	2.52153	0.0116845	0.0207094
YBR164C	Sbay_4.416	773.083	0.795645	0.134209	5.92839	3.05911e-09	1.51434e-08
YIL153W	Sbay_9.35	350.083	-0.568629	0.165733	-3.43101	0.000601349	0.00137323
YIL045W	Sbay_9.155	575.564	1.7373	0.161575	10.7522	5.78383e-27	1.2293e-25
YJR088C	Sbay_12.175	829.675	0.241675	0.118612	2.03752	0.0415978	0.0649191
YIR029W	Sbay_9.245	102.167	1.40876	0.283031	4.97741	6.44392e-07	2.37514e-06
YHR074W	Sbay_15.265	1160.42	-0.207597	0.106719	-1.94527	0.0517424	0.0788297
YDR464W	Sbay_2.640	488.168	-0.552057	0.143563	-3.8454	0.000120355	0.000310373
YMR030W	Sbay_13.198	191.293	0.480783	0.212553	2.26194	0.0237011	0.039182
YLR368W	Sbay_10.484	218.97	0.132934	0.182202	0.729598	0.465636	0.542513
YBR268W	Sbay_4.529	931.667	0.316166	0.108423	2.91604	0.003545	0.00699025
YFR030W	Sbay_6.103	645.083	0.393681	0.144344	2.72738	0.00638404	0.0119999
YKL089W	Sbay_11.136	179.61	0.613843	0.194768	3.15166	0.00162347	0.00343645
YOR006C	Sbay_15.181	430.502	-0.429387	0.151022	-2.8432	0.00446625	0.00867489
YBR131W	Sbay_4.379	186.343	1.11276	0.209604	5.30887	1.1031e-07	4.47978e-07
YJR093C	Sbay_12.180	610.58	1.00082	0.129779	7.7117	1.24153e-14	1.03348e-13
YLR277C	Sbay_10.375	467.322	0.0205221	0.141338	0.145199	0.884554	0.909096
YAL011W	Sbay_1.57	428.584	1.05022	0.138366	7.59015	3.19537e-14	2.59736e-13
YDL155W	Sbay_4.90	368.082	0.254285	0.145029	1.75334	0.0795431	0.115549
YBR244W	Sbay_4.504	1008.83	-0.629546	0.164193	-3.83418	0.000125981	0.000324077
YIL055C	Sbay_9.144	192.892	-0.742441	0.198631	-3.7378	0.000185639	0.000461516
YPL053C	Sbay_16.261	867.883	0.499837	0.121186	4.12455	3.71459e-05	0.000104242
YLR436C	Sbay_10.552	790.39	0.759749	0.128536	5.91077	3.40505e-09	1.67698e-08
YOR028C	Sbay_8.81	590.268	1.60217	0.165655	9.6717	3.977e-22	6.15663e-21
YBR179C	Sbay_4.430	1053.17	0.445027	0.110048	4.04394	5.25594e-05	0.000143535
YDR282C	Sbay_2.448	346.729	-0.408116	0.148038	-2.75684	0.00583637	0.0110748
YDR009W	Sbay_4.262	166.016	1.09197	0.230036	4.74696	2.06499e-06	7.05007e-06
YJR097W	Sbay_12.185	63.7519	1.9956	0.395909	5.04055	4.64197e-07	1.7394e-06
YPR091C	Sbay_16.419	1148.24	0.584582	0.112012	5.2189	1.79987e-07	7.15259e-07
YLR351C	Sbay_10.452	991.167	-0.247433	0.112253	-2.20425	0.0275071	0.0448873
YOL094C	Sbay_15.71	389.167	1.00015	0.143842	6.95311	3.57317e-12	2.38488e-11
YPR116W	Sbay_16.444	86.3977	0.34542	0.27818	1.24171	0.214342	0.277054
YAL002W	Sbay_1.69	557.24	0.286784	0.135217	2.12091	0.0339294	0.0541242
YJL095W	Sbay_6.169	286.995	0.0505865	0.164867	0.306831	0.758972	0.805408
YHR018C	Sbay_15.201	731.667	1.01821	0.152189	6.69041	2.22549e-11	1.37071e-10
YDR408C	Sbay_2.585	1381.47	-0.386252	0.121445	-3.18046	0.00147044	0.00313686
YOR260W	Sbay_8.310	1292.63	0.190097	0.10619	1.79015	0.0734291	0.107693
YBR126C	Sbay_4.372	11665.9	-0.500848	0.0903908	-5.54092	3.00891e-08	1.31128e-07
YLR287C-A	Sbay_8.239	6810.54	-1.09988	0.0826095	-13.3142	1.91301e-40	7.4593e-39
YLR257W	Sbay_10.354	7339.67	0.885057	0.104754	8.44893	2.93973e-17	3.08612e-16
YGL202W	Sbay_7.61	2427.17	-0.434065	0.0945177	-4.59242	4.38138e-06	1.421e-05
YPL106C	Sbay_16.206	9677.25	-0.00617176	0.0777026	-0.079428	0.936692	0.948581
YLR173W	Sbay_10.270	409.654	1.07142	0.137289	7.80415	5.99051e-15	5.14351e-14
YOR046C	Sbay_8.98	1373	-0.307608	0.110306	-2.78869	0.00529215	0.0101423
YKR035W-A	Sbay_11.267	865	-0.5699	0.115452	-4.93623	7.96462e-07	2.9006e-06
YNL141W	Sbay_14.197	312.5	-0.413095	0.208651	-1.97983	0.0477222	0.0731778
YPL208W	Sbay_16.98	308.41	-1.40435	0.172648	-8.13417	4.14774e-16	3.96867e-15
YBL026W	Sbay_2.95	534.398	1.08307	0.173279	6.25044	4.09297e-10	2.24853e-09
YPR187W	Sbay_16.519	1727.79	-0.284289	0.102722	-2.76756	0.00564773	0.0107404
YKL032C	Sbay_11.193	855.425	-1.84447	0.121524	-15.1778	4.96387e-52	3.10152e-50
YEL018W	Sbay_5.66	365.863	1.20434	0.168592	7.14349	9.09876e-13	6.43468e-12
YDR121W	Sbay_2.282	181.694	-0.372611	0.202806	-1.83727	0.0661696	0.0978766
YER125W	Sbay_5.246	3034.42	0.2032	0.0878163	2.31392	0.0206719	0.0347502
YDR432W	Sbay_2.608	1657.72	-1.02917	0.107435	-9.57945	9.75598e-22	1.47506e-20
YGR195W	Sbay_7.489	534.417	-0.917702	0.135286	-6.78342	1.17361e-11	7.42235e-11
YPL211W	Sbay_16.95	1025.08	0.504349	0.113629	4.43855	9.05668e-06	2.80573e-05
YMR115W	Sbay_13.294	476.412	0.610904	0.136352	4.48035	7.45219e-06	2.33235e-05
YDL077C	Sbay_4.171	496.677	-0.189616	0.129767	-1.46121	0.143959	0.195437
YOR222W	Sbay_8.274	847.333	0.525654	0.12113	4.3396	1.42741e-05	4.31133e-05
YEL021W	Sbay_5.70	502.333	10.0088	2.05678	4.86624	1.13742e-06	4.04572e-06
YOL061W	Sbay_15.104	1521.69	-0.468926	0.0975695	-4.80607	1.53924e-06	5.3718e-06
YOR206W	Sbay_8.259	1261.02	-0.125564	0.106721	-1.17656	0.23937	0.305531
YGL104C	Sbay_7.163	404.759	-0.436629	0.146964	-2.971	0.0029683	0.00596883
YER152C	Sbay_5.281	506.909	-0.178629	0.155926	-1.1456	0.25196	0.319947
YLR015W	Sbay_10.95	254.836	-0.888241	0.17447	-5.09109	3.56006e-07	1.36154e-06
YHR116W	Sbay_15.313	568.409	-0.223371	0.124148	-1.79923	0.0719826	0.105691
YLL046C	Sbay_10.24	3.09997	-3.18117	1.57131	-2.02453	0.0429159	0.0666952
YDR523C	Sbay_2.703	17.4303	-3.25451	0.722407	-4.50509	6.6344e-06	2.08901e-05
YNL283C	Sbay_14.60	397.936	-0.157193	0.151777	-1.03568	0.300352	0.371925
YJL206C	Sbay_6.285	186.604	0.332482	0.187098	1.77705	0.0755606	0.110476
YMR114C	Sbay_13.293	479.076	0.313667	0.139018	2.2563	0.0240517	0.0396101
YDR402C	Sbay_2.578	12.1667	-0.0643244	0.698392	-0.0921037	0.926616	0.940213
YJL191W	Sbay_6.271	2294.39	-0.169099	0.109255	-1.54775	0.121683	0.169136
YPR066W	Sbay_16.394	106.998	-0.144865	0.247517	-0.585275	0.558363	0.629979
YBL046W	Sbay_2.71	421.75	1.06467	0.143426	7.42311	1.14398e-13	8.78916e-13
YGR017W	Sbay_7.299	887.346	-0.143973	0.116571	-1.23506	0.216807	0.279734
YDR031W	Sbay_2.182	839.333	1.29382	0.110345	11.7253	9.45865e-32	2.51551e-30
YJR061W	Sbay_12.150	140.315	0.242714	0.208332	1.16503	0.244006	0.310989
YOL005C	Sbay_15.169	355.364	-1.23222	0.164893	-7.47287	7.84636e-14	6.13744e-13
YOR213C	Sbay_8.266	217.91	-1.21911	0.223312	-5.45921	4.78245e-08	2.03294e-07
YOL107W	Sbay_15.57	132.417	1.05853	0.224849	4.70774	2.50482e-06	8.39689e-06
YEL050C	Sbay_5.19	3909.08	0.780856	0.0902745	8.64979	5.15941e-18	5.75412e-17
YFR016C	Sbay_6.76	1268.95	-1.84988	0.120685	-15.3282	4.95556e-53	3.21244e-51
YHR016C	Sbay_15.199	1820.24	0.239944	0.101011	2.37541	0.0175293	0.0299528
YOL072W	Sbay_15.93	385.917	0.113559	0.151345	0.750329	0.453057	0.530155
YLR450W	Sbay_10.568	553.606	-0.524462	0.12425	-4.22101	2.43205e-05	7.04616e-05
YNR048W	Sbay_14.403	177.425	-0.125745	0.191337	-0.657193	0.511057	0.584548
YGL159W	Sbay_7.104	406.801	1.57289	0.164729	9.54835	1.31777e-21	1.95816e-20
YOR155C	Sbay_8.206	581.667	-0.50109	0.123533	-4.05634	4.9847e-05	0.000136631
YGR109C	Sbay_7.393	38.7637	1.51281	0.619972	2.44013	0.0146821	0.0254313
YGL224C	Sbay_7.38	480.667	0.258289	0.13294	1.9429	0.0520281	0.079195
YIL017C	Sbay_9.184	671.923	0.655864	0.119158	5.50414	3.70966e-08	1.5992e-07
YNL268W	Sbay_14.75	1836.92	0.619119	0.120861	5.12256	3.01411e-07	1.16044e-06
YOR307C	Sbay_8.359	384.417	-0.0277374	0.146453	-0.189394	0.849784	0.880516
YLR396C	Sbay_10.513	429.364	1.49344	0.151404	9.86393	5.96682e-23	9.79238e-22
YNR009W	Sbay_14.362	137.556	-0.0823072	0.252406	-0.32609	0.744356	0.793633
YHR147C	Sbay_15.346	1766.33	-0.0495854	0.092463	-0.536273	0.59177	0.660409
YOL123W	Sbay_15.37	4261.47	-0.521294	0.0970043	-5.37393	7.70381e-08	3.20128e-07
YDR132C	Sbay_2.295	78.1074	-2.17915	0.313139	-6.95906	3.42559e-12	2.29524e-11
YML116W	Sbay_13.27	248.956	0.682223	0.194265	3.51182	0.000445048	0.00103871
YMR126C	Sbay_13.305	109.833	-0.281745	0.254905	-1.1053	0.269032	0.338476
YGL066W	Sbay_7.202	605.913	0.0715167	0.124192	0.575854	0.564714	0.635411
YGR156W	Sbay_7.447	372.065	0.592191	0.140649	4.21042	2.54901e-05	7.36033e-05
YNR056C	Sbay_14.415	20.4696	1.46459	0.5847	2.50485	0.0122503	0.0216162
YDR185C	Sbay_2.354	383.917	0.66768	0.150938	4.42355	9.70912e-06	2.98999e-05
YOR070C	Sbay_8.120	337.358	-1.32056	0.152801	-8.64236	5.50653e-18	6.11277e-17
YLR179C	Sbay_10.276	1351.17	-3.98775	0.157534	-25.3135	2.26735e-141	9.79873e-139
YBR084C-A	Sbay_4.329	12948.8	0.728502	0.0777136	9.37418	6.97123e-21	9.82413e-20
YCL011C	Sbay_3.8	2169.34	-0.330339	0.0942819	-3.50373	0.000458784	0.0010655
YOR166C	Sbay_8.221	301.041	-0.378381	0.161928	-2.33673	0.0194532	0.0328293
YHR207C	Sbay_15.413	360.14	0.564645	0.150491	3.75202	0.000175414	0.00043968
YOL086C	Sbay_15.81	85438.8	-0.0558406	0.09695	-0.575974	0.564633	0.635411
YHL038C	Sbay_8.14	424.583	-0.018735	0.156696	-0.119563	0.90483	0.923892
YER141W	Sbay_5.269	2863.5	-0.0211575	0.112314	-0.188379	0.850579	0.880812
YNL044W	Sbay_14.296	934.371	0.350998	0.114365	3.06911	0.00214696	0.00446259
YMR313C	Sbay_13.506	559.202	0.108401	0.133537	0.81177	0.416924	0.493532
YDR425W	Sbay_2.602	324.353	0.743343	0.167507	4.43769	9.09303e-06	2.81531e-05
YNL220W	Sbay_14.122	4676.67	0.401802	0.0996314	4.03289	5.50951e-05	0.00014975
YBL007C	Sbay_2.118	2241.19	-0.338524	0.0896705	-3.7752	0.00015988	0.000403868
YGR060W	Sbay_7.342	3445.5	0.212848	0.0889658	2.39247	0.0167354	0.0286898
YNL210W	Sbay_14.133	0.166674	-0.0263985	4.40738	-0.00598962	0.995221	0.997247
YCL064C	Sbay_3.150	1452.94	0.805547	0.138044	5.83542	5.36543e-09	2.58358e-08
YML076C	Sbay_13.76	229.273	-1.06876	0.207709	-5.14548	2.66837e-07	1.03347e-06
YER174C	Sbay_5.308	292.583	-0.268272	0.196124	-1.36787	0.171353	0.227856
YPL147W	Sbay_16.163	182.5	0.800554	0.197813	4.04702	5.18742e-05	0.000141739
YML029W	Sbay_13.130	454.575	0.321694	0.139263	2.30998	0.0208891	0.0350699
YCL048W	Sbay_3.165	5.91667	-6.1834	1.53213	-4.03582	5.4413e-05	0.000148051
YOL133W	Sbay_15.26	372.5	-0.817101	0.148619	-5.49795	3.84233e-08	1.6509e-07
YNL313C	Sbay_14.26	645.583	0.341045	0.155812	2.18882	0.02861	0.0465125
YNL022C	Sbay_14.325	492.083	-0.48093	0.137163	-3.50627	0.000454433	0.00105681
YPL178W	Sbay_16.131	660.599	-0.537273	0.11724	-4.58268	4.5905e-06	1.48697e-05
YGL219C	Sbay_7.43	786.41	-0.820805	0.126763	-6.47509	9.47537e-11	5.52748e-10
YLR127C	Sbay_10.220	256.422	-0.0230221	0.163761	-0.140584	0.888199	0.911577
YGL031C	Sbay_7.247	17592.9	0.15872	0.0773539	2.05187	0.0401827	0.0628809
YCR048W	Sbay_3.87	622.404	-0.277782	0.143413	-1.93693	0.0527536	0.0800175
YCR033W	Sbay_3.67	741.471	-0.577642	0.113591	-5.08528	3.67091e-07	1.3998e-06
YER069W	Sbay_5.181	365.833	0.704938	0.174363	4.04292	5.27898e-05	0.000143937
YGL121C	Sbay_7.147	363.5	1.62932	0.168193	9.68721	3.41722e-22	5.33786e-21
YER012W	Sbay_5.102	1995.08	0.758647	0.0940197	8.06902	7.08653e-16	6.68195e-15
YDR104C	Sbay_2.263	228.793	0.61536	0.185569	3.31606	0.000912961	0.00202303
YDR222W	Sbay_2.389	56.2242	-3.06961	0.501823	-6.11693	9.53979e-10	5.03802e-09
YBL067C	Sbay_2.50	518.02	-0.847134	0.133055	-6.36678	1.93043e-10	1.09412e-09
YLR111W	Sbay_10.201	1.31909	-2.02219	2.14622	-0.94221	0.346085	0.419737
YMR208W	Sbay_13.391	1331.25	0.228565	0.106174	2.15275	0.0313385	0.050363
YHR098C	Sbay_15.293	1156.57	-0.218425	0.108615	-2.01101	0.0443246	0.0684944
YDL019C	Sbay_4.229	2364.69	0.336345	0.0894491	3.76019	0.000169787	0.000426812
YLR196W	Sbay_10.292	1293.29	-0.374893	0.105913	-3.53961	0.000400713	0.000943304
YML034W	Sbay_13.126	401.362	-0.175776	0.160839	-1.09287	0.274451	0.344292
YDL135C	Sbay_4.109	773.583	0.428472	0.110605	3.87391	0.000107104	0.000278696
YPR023C	Sbay_16.350	767.333	-0.420868	0.114855	-3.66435	0.000247968	0.000604023
YLR042C	Sbay_10.126	16.2005	2.55099	0.858205	2.97248	0.00295408	0.00594253
YCR093W	Sbay_3.131	1406.31	0.264649	0.100214	2.64084	0.00827015	0.0151382
YMR011W	Sbay_13.174	19244.6	0.420555	0.0902538	4.6597	3.16672e-06	1.04403e-05
YLR144C	Sbay_10.241	417.462	1.11238	0.142895	7.78457	6.9949e-15	5.95814e-14
YKR059W	Sbay_11.294	5437.9	-0.199621	0.0883899	-2.25842	0.0239197	0.0394623
YIL152W	Sbay_9.36	580.614	2.92745	0.181453	16.1334	1.48706e-58	1.18645e-56
YPR058W	Sbay_16.386	520	0.225797	0.132477	1.70443	0.0883016	0.126851
YDL020C	Sbay_4.228	1481.61	0.16604	0.124925	1.32912	0.183807	0.242365
YOL084W	Sbay_15.82	1793.45	3.70611	0.432064	8.57768	9.68088e-18	1.05918e-16
YDR168W	Sbay_2.332	1809	0.127079	0.0965714	1.3159	0.188207	0.247349
YML061C	Sbay_13.96	341.333	-0.719428	0.157807	-4.55891	5.14205e-06	1.65119e-05
YBR050C	Sbay_4.283	38.1585	-0.0138294	0.374288	-0.0369484	0.970526	0.97731
YGL080W	Sbay_7.190	718.789	0.60917	0.161086	3.78164	0.0001558	0.000394136
YNL202W	Sbay_14.139	20.6667	0.171288	0.491419	0.348557	0.727422	0.779262
YDL191W	Sbay_4.57	7337.8	-0.877091	0.0802292	-10.9323	8.07609e-28	1.79754e-26
YJL186W	Sbay_6.266	840.417	0.40863	0.144939	2.81933	0.00481237	0.00926391
YER023W	Sbay_5.118	3170.33	1.22877	0.0996776	12.3274	6.44686e-35	1.96667e-33
YER163C	Sbay_5.297	393.25	-0.881357	0.14012	-6.29002	3.17416e-10	1.76433e-09
YPL268W	Sbay_16.37	235.298	-0.464322	0.177915	-2.6098	0.00905951	0.016462
YER132C	Sbay_5.253	264.78	0.718061	0.179261	4.00567	6.18409e-05	0.000167122
YPL116W	Sbay_16.194	614.922	0.596223	0.126455	4.71491	2.41822e-06	8.14334e-06
YPL140C	Sbay_16.170	302.982	-1.43145	0.182492	-7.8439	4.36778e-15	3.80056e-14
YBR069C	Sbay_4.308	367.663	-0.0869141	0.189254	-0.459245	0.646058	0.708642
YOR060C	Sbay_8.110	189.417	0.110048	0.217935	0.504959	0.613587	0.679638
YML016C	Sbay_13.143	767.935	-0.943317	0.129024	-7.31118	2.64811e-13	1.95628e-12
YGL040C	Sbay_7.234	1406.83	-1.07492	0.106945	-10.0511	9.08072e-24	1.61276e-22
YKR084C	Sbay_11.320	1091.11	0.221205	0.113689	1.94571	0.0516899	0.0787728
YDL017W	Sbay_4.232	216.417	-0.386189	0.190377	-2.02855	0.0425042	0.0661346
YDR512C	Sbay_2.692	288.028	-0.437377	0.170058	-2.57193	0.0101133	0.0181808
YDR113C	Sbay_2.273	154.556	-0.142447	0.235333	-0.605299	0.54498	0.617583
YKR073C	Sbay_11.308	3.87631	1.12834	1.18973	0.948401	0.342925	0.417271
YOR021C	Sbay_8.75	1236.5	-0.520151	0.104047	-4.9992	5.75677e-07	2.13705e-06
YLR033W	Sbay_10.113	605.293	-0.031106	0.128139	-0.242753	0.808197	0.846681
YLL064C	Sbay_1.88	3.15366	4.90098	1.79536	2.72981	0.00633714	0.0119204
YBR021W	Sbay_2.150	179.5	1.14542	0.206719	5.54093	3.00871e-08	1.31128e-07
YLR438C-A	Sbay_10.556	497.017	-0.381098	0.140167	-2.71889	0.0065501	0.0122764
YGR255C	Sbay_7.552	932.702	-0.298455	0.11555	-2.58291	0.00979721	0.0176848
YNL156C	Sbay_14.183	1346.24	0.607663	0.108456	5.60285	2.10851e-08	9.378e-08
YNL138W	Sbay_14.200	2514.63	-0.338153	0.0977245	-3.46026	0.000539646	0.00123943
YGL110C	Sbay_7.158	474.866	-0.278837	0.135284	-2.06111	0.0392923	0.061655
YDL051W	Sbay_4.199	1303.76	0.0173732	0.113874	0.152565	0.878742	0.904556
YDR179W-A	Sbay_2.346	82.7997	0.904006	0.298155	3.032	0.00242941	0.00498573
YKL074C	Sbay_11.149	427.833	0.529335	0.140452	3.7688	0.000164033	0.000413351
YBL102W	Sbay_2.15	438.917	-0.12858	0.13776	-0.933366	0.350631	0.424457
YOR030W	Sbay_8.82	266.996	0.222867	0.171361	1.30057	0.193404	0.253217
YMR242C	Sbay_13.427	10272.4	0.567651	0.0803361	7.06595	1.59519e-12	1.09863e-11
YIL038C	Sbay_9.162	865.314	-0.29258	0.114222	-2.56151	0.010422	0.018685
YGR282C	Sbay_7.579	7654.58	-0.326931	0.087741	-3.72609	0.000194471	0.000482089
YMR280C	Sbay_13.468	140.138	1.89837	0.224575	8.45317	2.83503e-17	2.9883e-16
YBR079C	Sbay_4.319	5139.64	-0.0130524	0.095372	-0.136858	0.891143	0.913153
YOR061W	Sbay_8.111	1661.92	0.0852266	0.112034	0.760724	0.446822	0.524614
YMR077C	Sbay_13.256	198.861	-0.0578121	0.192335	-0.30058	0.763735	0.808972
YPL183C	Sbay_16.126	468.333	-1.64254	0.163499	-10.0462	9.5519e-24	1.69065e-22
YDR166C	Sbay_2.330	425.005	-0.103502	0.132651	-0.780253	0.435242	0.512526
YKR088C	Sbay_11.324	418.417	-0.269676	0.133691	-2.01715	0.0436796	0.0677042
YNL068C	Sbay_14.272	256.72	-0.920403	0.172171	-5.34586	8.99882e-08	3.71121e-07
YPL186C	Sbay_16.122	406.922	-1.33811	0.146599	-9.12767	6.99893e-20	9.07411e-19
YGR204W	Sbay_7.498	4539.08	-0.711851	0.0861252	-8.2653	1.3934e-16	1.38168e-15
YMR198W	Sbay_13.380	152.639	0.289916	0.204839	1.41534	0.156969	0.211056
YJR080C	Sbay_12.169	1013.25	0.153884	0.103575	1.48573	0.137351	0.187695
YJL005W	Sbay_12.76	1274.74	-0.425811	0.100715	-4.22788	2.35902e-05	6.84222e-05
YJL050W	Sbay_6.125	1134.75	0.387039	0.104018	3.72086	0.000198542	0.000490539
YDL192W	Sbay_4.56	5402.83	-0.220787	0.0812788	-2.71641	0.00659935	0.0123493
YOL095C	Sbay_15.70	183.674	0.350423	0.217606	1.61035	0.107321	0.151076
YDR146C	Sbay_2.307	330.257	0.518911	0.174497	2.97376	0.0029418	0.00592472
YKR063C	Sbay_11.298	256.608	0.090452	0.181212	0.49915	0.617674	0.683434
YHR056C	Sbay_15.245	474.512	0.807085	0.144207	5.59672	2.18451e-08	9.68278e-08
YBR112C	Sbay_4.361	1614.46	0.0806081	0.113559	0.709837	0.477806	0.553721
YPL158C	Sbay_16.152	903.985	0.0232286	0.132815	0.174895	0.861162	0.889462
YJL105W	Sbay_6.181	10.2952	-1.60631	0.747565	-2.14872	0.0316563	0.0508423
YBL081W	Sbay_2.37	237.485	-0.21597	0.175655	-1.22952	0.218879	0.282084
YDR248C	Sbay_2.414	549.938	-0.332492	0.137181	-2.42375	0.0153614	0.0265547
YFL040W	Sbay_6.17	6.5	1.45154	0.900409	1.61209	0.106943	0.150627
YDL202W	Sbay_4.46	2033.28	0.632901	0.0913507	6.92825	4.26075e-12	2.81481e-11
YDL100C	Sbay_4.146	2393.08	0.427481	0.0878677	4.86505	1.1443e-06	4.06739e-06
YFL008W	Sbay_6.52	446.168	0.550439	0.136829	4.02283	5.75019e-05	0.000155883
YDR337W	Sbay_2.507	2043.25	0.256727	0.0950859	2.69995	0.00693509	0.012914
YOL006C	Sbay_15.168	839.526	0.346877	0.116006	2.99017	0.00278824	0.00564836
YJL061W	Sbay_6.137	606.904	0.263144	0.127766	2.05959	0.0394381	0.0618651
YML083C	Sbay_13.67	5.58333	1.73301	1.08011	1.60448	0.108608	0.152682
YMR206W	Sbay_13.388	74	-0.300065	0.273898	-1.09553	0.273282	0.342992
YLR216C	Sbay_10.311	3219.42	0.448494	0.124394	3.60543	0.000311631	0.000745441
YPR181C	Sbay_16.513	3089.25	0.275846	0.0926543	2.97715	0.00290938	0.00586785
YMR017W	Sbay_13.184	31.7092	1.76725	0.446306	3.95974	7.50321e-05	0.00020006
YDR217C	Sbay_2.385	244.122	0.846635	0.217347	3.89531	9.8073e-05	0.000256742
YOR250C	Sbay_8.299	424.75	0.246002	0.156668	1.57021	0.116366	0.162574
YGR063C	Sbay_7.345	418.333	-0.416126	0.159933	-2.60188	0.00927148	0.016806
YDR441C	Sbay_2.617	194.75	0.341745	0.184186	1.85543	0.0635346	0.0942951
YGL140C	Sbay_7.124	542.762	-0.421605	0.129885	-3.24598	0.00117047	0.00254083
YLR432W	Sbay_10.549	3080.7	-0.107035	0.112807	-0.948834	0.342705	0.417101
YNL020C	Sbay_14.327	517.293	-0.955682	0.157588	-6.06444	1.32417e-09	6.86026e-09
YOR101W	Sbay_8.155	912.999	1.23411	0.144888	8.51767	1.62799e-17	1.74077e-16
YLR290C	Sbay_10.386	340	0.606357	0.15724	3.85625	0.000115138	0.000298552
YER090W	Sbay_5.206	1099.25	-0.0952088	0.102109	-0.932428	0.351116	0.424944
YIL123W	Sbay_9.68	1226.71	0.834341	0.111227	7.50124	6.32188e-14	4.975e-13
YOR314W-A	Sbay_8.365	0.654514	-1.28159	3.67077	-0.349135	0.726988	0.779099
YMR246W	Sbay_13.431	2060.38	0.318238	0.107245	2.96741	0.00300323	0.00603206
YMR035W	Sbay_13.204	218.5	-0.552733	0.175473	-3.14996	0.00163294	0.00345505
YDR231C	Sbay_2.397	566.154	-0.0536532	0.119822	-0.447773	0.654317	0.716307
YLR352W	Sbay_10.453	426.726	0.579644	0.133347	4.34688	1.3809e-05	4.18549e-05
YJL112W	Sbay_6.187	672.083	0.212668	0.121349	1.75253	0.0796822	0.115654
YCR015C	Sbay_3.40	165.38	-0.0980661	0.19261	-0.509143	0.610652	0.677544
YOR178C	Sbay_8.234	665.477	0.943515	0.146315	6.44852	1.12948e-10	6.50831e-10
YHR152W	Sbay_15.351	390.347	0.285412	0.148831	1.91768	0.055151	0.0832401
YKR011C	Sbay_11.243	624.095	-0.226365	0.120583	-1.87726	0.0604831	0.0903935
YOR274W	Sbay_8.323	312.5	0.427403	0.167489	2.55183	0.010716	0.0191566
YDR159W	Sbay_2.322	508.13	0.0293028	0.141942	0.206442	0.836445	0.869997
YMR173W	Sbay_13.354	5154.81	5.76836	0.303863	18.9834	2.33823e-80	3.46459e-78
YGL185C	Sbay_7.78	202.689	-0.637455	0.271123	-2.35116	0.0187149	0.0317276
YMR059W	Sbay_13.232	163.844	1.38468	0.222037	6.23626	4.4816e-10	2.44906e-09
YDR062W	Sbay_2.221	2099.25	0.152199	0.0905461	1.6809	0.0927819	0.132387
YLL033W	Sbay_10.39	65.0343	-0.855808	0.307634	-2.7819	0.00540416	0.0103303
YNL265C	Sbay_14.77	581.259	0.0940803	0.124125	0.757947	0.448483	0.525968
YOR230W	Sbay_8.281	5320.05	-1.72034	0.0943273	-18.238	2.5758e-74	3.1805e-72
YML058W	Sbay_13.100	972.981	-1.06764	0.109574	-9.74349	1.96684e-22	3.14815e-21
YML123C	Sbay_13.20	1455.44	-0.955834	0.146213	-6.53728	6.26492e-11	3.71484e-10
YOR251C	Sbay_8.300	1023.33	0.977285	0.115635	8.45147	2.87659e-17	3.02596e-16
YDR107C	Sbay_2.267	220.333	1.43316	0.189319	7.57005	3.7309e-14	3.00441e-13
YJR076C	Sbay_12.166	1003.33	-0.691112	0.109893	-6.28894	3.19644e-10	1.77481e-09
YHR190W	Sbay_15.393	4731.75	0.320627	0.0906735	3.53606	0.000406144	0.000954787
YLR106C	Sbay_10.191	2642.48	-0.931153	0.108748	-8.56245	1.10489e-17	1.20378e-16
YPR013C	Sbay_16.335	909.333	-0.585393	0.140686	-4.16098	3.16884e-05	8.99486e-05
YPR005C	Sbay_16.324	256.382	1.44534	0.194563	7.42867	1.09698e-13	8.45308e-13
YKR065C	Sbay_11.300	1069.93	-0.193836	0.114182	-1.6976	0.0895831	0.128219
YKL157W	Sbay_11.69	2775.8	0.699921	0.103464	6.76487	1.33426e-11	8.3771e-11
YKR002W	Sbay_11.232	816.553	0.552464	0.121708	4.53927	5.64492e-06	1.79819e-05
YGR044C	Sbay_7.329	7.72397	-2.3331	0.893196	-2.61208	0.00899931	0.0163641
YBR003W	Sbay_2.132	1739.75	-0.246672	0.100457	-2.45551	0.0140686	0.0244914
YDR200C	Sbay_2.367	347.65	-0.274242	0.149988	-1.82843	0.0674849	0.0995949
YPL050C	Sbay_16.265	1375.58	0.21303	0.101141	2.10626	0.0351816	0.0557786
YBR068C	Sbay_4.307	1426.83	-0.0464909	0.130862	-0.355265	0.722391	0.775796
YOL140W	Sbay_15.20	188.167	0.262495	0.201148	1.30498	0.191898	0.251309
YDR279W	Sbay_2.445	222.051	-0.635397	0.192922	-3.29354	0.000989333	0.00217771
YDL113C	Sbay_4.133	766.333	0.616748	0.127279	4.84565	1.26196e-06	4.43996e-06
YNL138W-A	Sbay_14.199	159.31	-0.896089	0.198335	-4.51805	6.24121e-06	1.976e-05
YPL083C	Sbay_16.229	293.08	0.704764	0.166999	4.22016	2.4413e-05	7.069e-05
YNL011C	Sbay_14.336	414.65	0.0295184	0.148788	0.198392	0.842738	0.874788
YDR357C	Sbay_2.529	149.167	-0.411803	0.23494	-1.7528	0.0796367	0.115653
YDL099W	Sbay_4.147	1065.78	-0.290676	0.115799	-2.51017	0.0120674	0.0213007
YGL007W	Sbay_7.274	1.61984	-2.25824	2.12356	-1.06343	0.287589	0.358346
YGL226C-A	Sbay_7.33	191.396	-1.18274	0.202314	-5.84607	5.03329e-09	2.43722e-08
YML090W	Sbay_13.61	0.413474	1.65149	4.36884	0.378017	0.705418	0.761194
YBR130C	Sbay_4.378	604.417	0.663294	0.128269	5.17112	2.327e-07	9.1078e-07
YLR274W	Sbay_10.372	369.417	-0.270747	0.144894	-1.86858	0.0616807	0.0920507
YPR016C	Sbay_16.339	2057.08	-0.949559	0.106541	-8.91259	4.98558e-19	6.12683e-18
YBR247C	Sbay_4.508	846.224	0.311943	0.126088	2.47401	0.0133607	0.0233452
YLR185W	Sbay_10.281	7234.28	0.221052	0.0833138	2.65325	0.00797203	0.0146347
YDR463W	Sbay_2.639	986.991	0.657059	0.105242	6.24331	4.28417e-10	2.3486e-09
YIL001W	Sbay_9.207	240.076	0.231895	0.176573	1.31331	0.189079	0.248307
YAL010C	Sbay_1.58	294.907	0.726683	0.159226	4.56385	5.0223e-06	1.61473e-05
YIL154C	Sbay_9.34	953.234	-0.20966	0.135195	-1.5508	0.12095	0.168298
YPL149W	Sbay_16.161	491.434	-1.73019	0.14842	-11.6574	2.10438e-31	5.56802e-30
YHR174W	Sbay_15.374	114709	0.553756	0.0769075	7.20028	6.00895e-13	4.32211e-12
YIL101C	Sbay_9.95	98.7431	1.44392	0.29493	4.89581	9.79029e-07	3.53569e-06
YBR165W	Sbay_4.418	185.888	-0.0659136	0.191004	-0.34509	0.730027	0.781891
YNL261W	Sbay_14.81	206	-0.192261	0.185379	-1.03713	0.299677	0.371268
YHR097C	Sbay_15.292	1689.1	0.185415	0.0999748	1.85462	0.0636506	0.0944198
YDL220C	Sbay_4.25	158.975	-0.29223	0.200667	-1.45629	0.145312	0.196965
YGR170W	Sbay_7.463	552.315	-0.222954	0.12579	-1.77243	0.0763239	0.111403
YHR075C	Sbay_15.266	259.833	1.53383	0.179184	8.56008	1.12788e-17	1.22624e-16
YKL004W	Sbay_11.225	543.917	-0.881313	0.136961	-6.43475	1.23674e-10	7.11057e-10
YOR208W	Sbay_8.261	409.569	-0.304167	0.144289	-2.10803	0.0350282	0.0556064
YNL142W	Sbay_14.196	51.5	-1.4812	0.45395	-3.26291	0.00110274	0.00240691
YMR250W	Sbay_13.434	2934.21	0.0761251	0.108661	0.700576	0.483568	0.5589
YFR031C	Sbay_6.104	370.5	-1.2014	0.151435	-7.93343	2.13178e-15	1.93615e-14
YMR083W	Sbay_13.261	5015.17	-0.209848	0.0858239	-2.4451	0.0144813	0.0251256
YHR019C	Sbay_15.202	5286.25	0.223193	0.0945861	2.35968	0.0182905	0.03111
YJR129C	Sbay_12.220	168.027	-0.015409	0.224124	-0.0687522	0.945187	0.955691
YOR367W	Sbay_8.423	453.696	1.18769	0.148313	8.00802	1.16572e-15	1.07379e-14
YDR281C	Sbay_2.447	27.1378	3.97018	0.679321	5.84433	5.086e-09	2.45815e-08
YAL003W	Sbay_1.68	12591.3	-0.119499	0.0862545	-1.38543	0.165922	0.221714
YNL053W	Sbay_14.287	188.25	-0.165266	0.210602	-0.784732	0.432611	0.509977
YIL149C	Sbay_9.39	985.454	0.526645	0.124077	4.24451	2.19073e-05	6.40063e-05
YNL271C	Sbay_14.71	932.383	0.180067	0.113006	1.59343	0.111064	0.155838
YLR200W	Sbay_10.295	393.25	-0.27723	0.159313	-1.74016	0.0818311	0.118409
YGR138C	Sbay_7.425	4651.83	0.843325	0.0957847	8.80438	1.31578e-18	1.55436e-17
YPL075W	Sbay_16.237	1444.29	0.769851	0.0982739	7.83373	4.736e-15	4.08667e-14
YLR258W	Sbay_10.356	8298.25	0.495888	0.0849962	5.83423	5.40386e-09	2.59726e-08
YNR015W	Sbay_14.368	432.257	-0.909696	0.139051	-6.54219	6.06247e-11	3.6055e-10
YJR098C	Sbay_12.186	180.41	-0.936741	0.197539	-4.74207	2.11548e-06	7.19874e-06
YBR127C	Sbay_4.375	8670.08	0.478514	0.0862467	5.54821	2.88614e-08	1.26202e-07
YOL098C	Sbay_15.67	1309.98	0.234478	0.103755	2.25991	0.0238271	0.0393652
YLR350W	Sbay_10.451	1278.79	-0.699329	0.111497	-6.27218	3.56037e-10	1.97055e-09
YMR253C	Sbay_13.438	350.877	-0.523856	0.149125	-3.51287	0.000443301	0.00103531
YFL024C	Sbay_6.34	302.768	-0.298512	0.160558	-1.85922	0.0629957	0.0937703
YPL243W	Sbay_16.64	1692.42	0.196065	0.107729	1.81999	0.068761	0.101305
YAL061W	Sbay_1.6	1568.33	1.17489	0.109348	10.7445	6.29038e-27	1.33151e-25
YHR176W	Sbay_15.376	178.75	1.14847	0.241263	4.76023	1.93371e-06	6.61985e-06
YGR163W	Sbay_7.455	394.917	0.0305755	0.139637	0.218964	0.826678	0.862137
YGL126W	Sbay_7.137	342.748	-2.41182	0.172342	-13.9944	1.68637e-44	7.95048e-43
YKL022C	Sbay_11.204	235.138	-0.130299	0.184007	-0.708124	0.478868	0.55458
YLR018C	Sbay_10.98	381.688	0.216508	0.141043	1.53504	0.124773	0.172922
YIL130W	Sbay_9.59	399.022	0.0466387	0.159799	0.291859	0.770394	0.814031
YOR012W	Sbay_15.190	65.1855	3.81373	0.791561	4.81799	1.45011e-06	5.071e-06
YBL092W	Sbay_2.24	21106.5	-0.0813575	0.075825	-1.07296	0.283287	0.35358
YBR201C-A	Sbay_4.456	30.3922	-1.6766	0.519189	-3.22926	0.00124109	0.0026818
YBR101C	Sbay_4.346	1973.33	0.0199006	0.142097	0.140049	0.888621	0.911649
YLR147C	Sbay_10.245	252.983	0.315926	0.164637	1.91893	0.0549938	0.0830512
YDL164C	Sbay_4.82	514.917	0.718301	0.142728	5.03265	4.83738e-07	1.81e-06
YJR050W	Sbay_12.134	304.168	-0.623774	0.170493	-3.65864	0.000253556	0.000616475
YOR156C	Sbay_8.207	159.674	0.173908	0.200661	0.866673	0.386121	0.462347
YPR188C	Sbay_16.520	293.833	-0.291933	0.168971	-1.72771	0.0840398	0.121165
YHR132W-A	Sbay_15.329	632.583	-0.468303	0.128355	-3.64849	0.00026379	0.000639557
YDL211C	Sbay_4.36	111.967	3.26972	0.352405	9.27832	1.7217e-20	2.33126e-19
YDR375C	Sbay_2.548	1684	-0.619147	0.105148	-5.88835	3.90078e-09	1.90664e-08
YHR062C	Sbay_15.251	287.417	-0.407634	0.16872	-2.41604	0.0156903	0.0270692
YIL014W	Sbay_9.191	422.397	-0.03689	0.151693	-0.243188	0.80786	0.846681
YBR149W	Sbay_4.398	6006.25	-1.10707	0.0908104	-12.191	3.47327e-34	1.01765e-32
YGL210W	Sbay_7.51	485	0.498927	0.147226	3.38885	0.000701863	0.00158393
YNL179C	Sbay_14.162	38.9104	1.22243	0.389001	3.14247	0.00167526	0.00353598
YDR088C	Sbay_2.248	296.75	0.156648	0.156478	1.00109	0.316785	0.389392
YDR320C	Sbay_2.489	447.33	-0.111638	0.144871	-0.770605	0.440941	0.518766
YOL149W	Sbay_15.11	406.333	0.541202	0.139134	3.8898	0.000100327	0.000262247
YKL042W	Sbay_11.183	224.919	0.766722	0.204053	3.75746	0.000171647	0.000430862
YLR376C	Sbay_10.492	79.5	1.26984	0.33598	3.77952	0.000157132	0.000397117
YLR281C	Sbay_10.377	14.0659	2.4738	0.680152	3.63712	0.000275704	0.000665952
YNL158W	Sbay_14.181	183.327	0.349412	0.199256	1.75358	0.0795023	0.115522
YNL066W	Sbay_14.275	532.794	0.258607	0.129185	2.00183	0.0453029	0.0698812
YLR453C	Sbay_10.572	66.6667	-2.27595	0.347557	-6.54841	5.81536e-11	3.46251e-10
YPL112C	Sbay_16.197	556.886	0.572177	0.188699	3.03222	0.00242762	0.00498402
YPL030W	Sbay_16.287	385.5	0.478093	0.159785	2.9921	0.00277067	0.00561936
YAL058W	Sbay_1.9	312.29	1.33623	0.164121	8.14173	3.89679e-16	3.73544e-15
YDR452W	Sbay_2.627	2219.42	-1.32789	0.100451	-13.2192	6.79545e-40	2.53534e-38
YLR316C	Sbay_10.413	164.359	-0.125316	0.19892	-0.629982	0.528706	0.601156
YDR319C	Sbay_2.488	153.464	-0.557652	0.203926	-2.73458	0.00624599	0.0117617
YFL033C	Sbay_6.26	572.054	0.313266	0.120582	2.59796	0.00937789	0.0169692
YKL095W	Sbay_11.130	247.903	-0.505777	0.170585	-2.96495	0.00302732	0.00607809
YJR136C	Sbay_12.228	276.833	0.896593	0.1642	5.46038	4.75121e-08	2.02131e-07
YGL225W	Sbay_7.37	1900	0.509835	0.106675	4.77931	1.75897e-06	6.08135e-06
YHR037W	Sbay_15.224	2478.17	1.26394	0.115121	10.9792	4.80941e-28	1.07507e-26
YJL098W	Sbay_6.172	518.288	1.03876	0.142255	7.30207	2.83373e-13	2.08746e-12
[truncated: 3,193 more rows]
